# Supplementary material
Source: publisher figshare collection journal article supplement (https://acs.figshare.com/ndownloader/files/3823456)
Supplement: Supplementary file 1 [file 3823456]

# CIF file for compound 13b?

data_mgrav3041_2
_audit_creation_date              2014-01-02
_audit_creation_method
;
Olex2 1.2-beta
(compiled 2013.12.10 svn.r2850 for OlexSys, GUI svn.r4736)
;
_shelxl_version_number            2013-3
_publ_contact_author_address      ?
_publ_contact_author_email        ?
_publ_contact_author_name         ''
_publ_contact_author_phone        ?
_publ_section_references
;
Dolomanov, O.V., Bourhis, L.J., Gildea, R.J, Howard, J.A.K. & Puschmann, H.
 (2009), J. Appl. Cryst. 42, 339-341.


Palatinus, L. & Chapuis, G. (2007). J. Appl. Cryst., 40, 786-790;
Palatinus, L. & van der Lee, A. (2008). J. Appl. Cryst. 41, 975-984;
Palatinus, L., Prathapa, S. J. & van Smaalen, S. (2012). J. Appl. Cryst. 45,
 575-580
Sheldrick, G.M. (2008). Acta Cryst. A64, 112-122
;
_chemical_name_common             ?
_chemical_name_systematic
;
 ?
;
_chemical_formula_moiety          'C16 H14 Cl N3 O5'
_chemical_formula_sum             'C16 H14 Cl N3 O5'
_chemical_formula_weight          363.75
_chemical_absolute_configuration  ad
_chemical_melting_point           ?
loop_
  _atom_type_symbol
  _atom_type_description
  _atom_type_scat_dispersion_real
  _atom_type_scat_dispersion_imag
  _atom_type_scat_source
 'C' 'C' 0.0033 0.0016 'International Tables Vol C Tables 4.2.6.8 and 6.1.1.4'
 'H' 'H' 0.0000 0.0000 'International Tables Vol C Tables 4.2.6.8 and 6.1.1.4'
 'Cl' 'Cl' 0.1484 0.1585 'International Tables Vol C Tables 4.2.6.8 and 6.1.1.4'
 'N' 'N' 0.0061 0.0033 'International Tables Vol C Tables 4.2.6.8 and 6.1.1.4'
 'O' 'O' 0.0106 0.0060 'International Tables Vol C Tables 4.2.6.8 and 6.1.1.4'

_shelx_space_group_comment
;
The symmetry employed for this shelxl refinement is uniquely defined
by the following loop, which should always be used as a source of
symmetry information in preference to the above space-group names.
They are only intended as comments.
;
_space_group_crystal_system       'orthorhombic'
_space_group_IT_number            29
_space_group_name_H-M_alt         'P c a 21'
_space_group_name_Hall            'P 2c -2ac'
loop_
  _space_group_symop_operation_xyz
 'x, y, z'
 '-x, -y, z+1/2'
 '-x+1/2, y, z+1/2'
 'x+1/2, -y, z'

_cell_length_a                    20.8077(17)
_cell_length_b                    10.5281(9)
_cell_length_c                    7.0437(6)
_cell_angle_alpha                 90
_cell_angle_beta                  90
_cell_angle_gamma                 90
_cell_volume                      1543.0(2)
_cell_formula_units_Z             4
_cell_measurement_reflns_used     9276
_cell_measurement_temperature     110(2)
_cell_measurement_theta_max       31.128
_cell_measurement_theta_min       2.752
_shelx_estimated_absorpt_T_max    ?
_shelx_estimated_absorpt_T_min    ?
_exptl_absorpt_coefficient_mu     0.283
_exptl_absorpt_correction_T_max   0.7462
_exptl_absorpt_correction_T_min   0.7020
_exptl_absorpt_correction_type    multi-scan
_exptl_absorpt_process_details
;
SADABS-2012/1 (Bruker,2012) was used for absorption correction.
wR2(int) was 0.0588 before and 0.0373 after correction.
The Ratio of minimum to maximum transmission is 0.9408.
The \l/2 correction factor is 0.0015.
;
_exptl_crystal_colour             colourless
_exptl_crystal_colour_primary     colourless
_exptl_crystal_density_diffrn     1.566
_exptl_crystal_density_meas       ?
_exptl_crystal_density_method     ?
_exptl_crystal_description        needle
_exptl_crystal_F_000              752
_exptl_crystal_recrystallization_method
;
'The material was recrystallised from a mixture of DCM and 
hexane by solvent layering'
;
_exptl_crystal_size_max           0.623
_exptl_crystal_size_mid           0.526
_exptl_crystal_size_min           0.312
_exptl_special_details
;
 ?
;
_exptl_transmission_factor_max    ?
_exptl_transmission_factor_min    ?
_diffrn_reflns_av_R_equivalents   0.0232
_diffrn_reflns_av_unetI/netI      0.0197
_diffrn_reflns_Laue_measured_fraction_full 0.999
_diffrn_reflns_Laue_measured_fraction_max 0.999
_diffrn_reflns_limit_h_max        30
_diffrn_reflns_limit_h_min        -30
_diffrn_reflns_limit_k_max        15
_diffrn_reflns_limit_k_min        -15
_diffrn_reflns_limit_l_max        10
_diffrn_reflns_limit_l_min        -10
_diffrn_reflns_number             19546
_diffrn_reflns_point_group_measured_fraction_full 0.999
_diffrn_reflns_point_group_measured_fraction_max 0.999
_diffrn_reflns_theta_full         26.000
_diffrn_reflns_theta_max          31.129
_diffrn_reflns_theta_min          1.934
_diffrn_ambient_temperature       110(2)
_diffrn_detector_area_resol_mean  512
_diffrn_measured_fraction_theta_full 0.999
_diffrn_measured_fraction_theta_max 0.999
_diffrn_measurement_device_type   'Bruker APEX-II CCD'
_diffrn_measurement_method        '\f and \w scans'
_diffrn_radiation_monochromator   graphite
_diffrn_radiation_type            MoK\a
_diffrn_radiation_wavelength      0.71073
_diffrn_source                    'fine-focus sealed tube'
_diffrn_standards_number          0
_reflns_Friedel_coverage          0.861
_reflns_Friedel_fraction_full     1.000
_reflns_Friedel_fraction_max      1.000
_reflns_number_gt                 4893
_reflns_number_total              4990
_reflns_special_details
;
 Reflections were merged by SHELXL according to the crystal
 class for the calculation of statistics and refinement.
 
 _reflns_Friedel_fraction is defined as the number of unique
 Friedel pairs measured divided by the number that would be
 possible theoretically, ignoring centric projections and
 systematic absences.
;
_reflns_threshold_expression      'I > 2\s(I)'
_computing_cell_refinement        'SAINT v8.32B (Bruker, 2013)'
_computing_data_collection        'APEX2 v2013.6-2 (Bruker, 2013)'
_computing_data_reduction         'SAINT v8.32B (Bruker, 2013)'
_computing_molecular_graphics     'Olex2 (Dolomanov et al., 2009)'
_computing_publication_material   'Olex2 (Dolomanov et al., 2009)'
_computing_structure_refinement   'ShelXL (Sheldrick, 2008)'
_computing_structure_solution
;
Superflip (Palatinus & Chapuis, 2007;Palatinus & van der Lee, 2008;
Palatinus et al., 2012)
;
_refine_diff_density_max          0.404
_refine_diff_density_min          -0.256
_refine_diff_density_rms          0.061
_refine_ls_abs_structure_details
;
 Flack x determined using 2234 quotients [(I+)-(I-)]/[(I+)+(I-)]
 (Parsons and Flack (2004), Acta Cryst. A60, s61).
;
_refine_ls_abs_structure_Flack    0.060(11)
_refine_ls_extinction_coef        .
_refine_ls_extinction_method      none
_refine_ls_goodness_of_fit_ref    1.092
_refine_ls_hydrogen_treatment     refall
_refine_ls_matrix_type            full
_refine_ls_number_parameters      282
_refine_ls_number_reflns          4990
_refine_ls_number_restraints      1
_refine_ls_R_factor_all           0.0315
_refine_ls_R_factor_gt            0.0309
_refine_ls_restrained_S_all       1.092
_refine_ls_shift/su_max           0.001
_refine_ls_shift/su_mean          0.000
_refine_ls_structure_factor_coef  Fsqd
_refine_ls_weighting_details
'w=1/[\s^2^(Fo^2^)+(0.0564P)^2^+0.1484P] where P=(Fo^2^+2Fc^2^)/3'
_refine_ls_weighting_scheme       calc
_refine_ls_wR_factor_gt           0.0782
_refine_ls_wR_factor_ref          0.0794
_refine_special_details
;
 ?
;
_olex2_refinement_description
;
;
_atom_sites_solution_hydrogens    difmap
_atom_sites_solution_primary      iterative
_atom_sites_solution_secondary    ?
loop_
  _atom_site_label
  _atom_site_type_symbol
  _atom_site_fract_x
  _atom_site_fract_y
  _atom_site_fract_z
  _atom_site_U_iso_or_equiv
  _atom_site_adp_type
  _atom_site_occupancy
  _atom_site_site_symmetry_order
  _atom_site_calc_flag
  _atom_site_refinement_flags_posn
  _atom_site_refinement_flags_adp
  _atom_site_refinement_flags_occupancy
  _atom_site_disorder_assembly
  _atom_site_disorder_group
 Cl1 Cl 0.64472(2) 0.63520(3) 0.84817(6) 0.01886(9) Uani 1 1 d . . . . .
 O3 O 0.58050(5) 0.23974(11) 0.47031(18) 0.0170(2) Uani 1 1 d . . . . .
 O2 O 0.83380(6) 0.05538(11) 0.5869(2) 0.0186(2) Uani 1 1 d . . . . .
 O5 O 0.62410(6) 0.07834(12) 0.6377(2) 0.0251(3) Uani 1 1 d . . . . .
 O4 O 0.74470(6) -0.02256(11) 0.4456(2) 0.0235(2) Uani 1 1 d . . . . .
 O1 O 0.67395(6) 0.62334(11) 0.29963(17) 0.0163(2) Uani 1 1 d . . . . .
 C16 C 0.51781(7) 0.18116(17) 0.4926(3) 0.0206(3) Uani 1 1 d . . . . .
 N2 N 0.76149(6) 0.40327(12) 0.5042(2) 0.0175(2) Uani 1 1 d . . . . .
 N1 N 0.69884(6) 0.37376(11) 0.52222(19) 0.0132(2) Uani 1 1 d . . . . .
 N3 N 0.79444(6) 0.29691(12) 0.5012(2) 0.0173(2) Uani 1 1 d . . . . .
 C12 C 0.69084(7) 0.24527(13) 0.5292(2) 0.0133(2) Uani 1 1 d . . . . .
 C15 C 0.62902(7) 0.17721(14) 0.5541(2) 0.0156(3) Uani 1 1 d . . . . .
 C5 C 0.56701(7) 0.59528(13) 0.3728(2) 0.0140(2) Uani 1 1 d . . . . .
 C3 C 0.65023(6) 0.47449(13) 0.5344(2) 0.0127(2) Uani 1 1 d . . . . .
 C13 C 0.77513(7) 0.06398(13) 0.5112(2) 0.0154(2) Uani 1 1 d . . . . .
 C6 C 0.58732(7) 0.70868(13) 0.4575(2) 0.0146(2) Uani 1 1 d . . . . .
 C10 C 0.50239(7) 0.56488(14) 0.3577(2) 0.0166(2) Uani 1 1 d . . . . .
 C11 C 0.75270(7) 0.19781(13) 0.5170(2) 0.0138(2) Uani 1 1 d . . . . .
 C8 C 0.47794(8) 0.76802(16) 0.5060(2) 0.0202(3) Uani 1 1 d . . . . .
 C14 C 0.86083(9) -0.07112(17) 0.5825(3) 0.0261(4) Uani 1 1 d . . . . .
 C7 C 0.54351(8) 0.79669(14) 0.5256(2) 0.0182(3) Uani 1 1 d . . . . .
 C2 C 0.67768(7) 0.59904(13) 0.6210(2) 0.0134(2) Uani 1 1 d . . . . .
 C9 C 0.45785(7) 0.65378(16) 0.4252(2) 0.0185(3) Uani 1 1 d . . . . .
 C1 C 0.65986(7) 0.69822(13) 0.4669(2) 0.0147(2) Uani 1 1 d . . . . .
 C4 C 0.62835(6) 0.52216(13) 0.3348(2) 0.0141(2) Uani 1 1 d . . . . .
 H16A H 0.4894(13) 0.242(3) 0.425(5) 0.031(7) Uiso 1 1 d . . . . .
 H16B H 0.5186(12) 0.106(2) 0.428(4) 0.019(6) Uiso 1 1 d . . . . .
 H16C H 0.5081(15) 0.177(3) 0.624(5) 0.035(7) Uiso 1 1 d . . . . .
 H14A H 0.8984(16) -0.069(3) 0.663(5) 0.038(8) Uiso 1 1 d . . . . .
 H14B H 0.8687(13) -0.090(3) 0.465(5) 0.025(6) Uiso 1 1 d . . . . .
 H14C H 0.8275(14) -0.129(2) 0.633(4) 0.025(6) Uiso 1 1 d . . . . .
 H3 H 0.6140(12) 0.442(2) 0.599(4) 0.020(5) Uiso 1 1 d . . . . .
 H2 H 0.7224(12) 0.595(2) 0.632(4) 0.020(5) Uiso 1 1 d . . . . .
 H1 H 0.6846(15) 0.773(3) 0.477(5) 0.034(7) Uiso 1 1 d . . . . .
 H4 H 0.6295(10) 0.462(2) 0.241(3) 0.010(5) Uiso 1 1 d . . . . .
 H7 H 0.5580(14) 0.876(2) 0.582(4) 0.026(6) Uiso 1 1 d . . . . .
 H9 H 0.4144(14) 0.636(2) 0.419(4) 0.024(6) Uiso 1 1 d . . . . .
 H10 H 0.4874(11) 0.485(3) 0.308(4) 0.024(6) Uiso 1 1 d . . . . .
 H8 H 0.4451(16) 0.821(3) 0.546(5) 0.035(7) Uiso 1 1 d . . . . .

loop_
  _atom_site_aniso_label
  _atom_site_aniso_U_11
  _atom_site_aniso_U_22
  _atom_site_aniso_U_33
  _atom_site_aniso_U_23
  _atom_site_aniso_U_13
  _atom_site_aniso_U_12
 Cl1 0.02433(17) 0.01755(15) 0.01468(14) -0.00212(12) -0.00146(13) 0.00423(12)
 O3 0.0107(4) 0.0181(5) 0.0221(5) 0.0021(4) -0.0019(4) -0.0025(4)
 O2 0.0144(5) 0.0146(4) 0.0268(5) 0.0016(4) -0.0008(4) 0.0034(4)
 O5 0.0188(6) 0.0208(5) 0.0357(7) 0.0107(5) -0.0009(5) -0.0039(4)
 O4 0.0237(5) 0.0165(5) 0.0303(6) -0.0026(5) -0.0054(5) -0.0006(4)
 O1 0.0141(5) 0.0188(5) 0.0162(5) 0.0005(4) 0.0032(4) -0.0014(4)
 C16 0.0117(6) 0.0260(7) 0.0240(8) 0.0008(6) -0.0007(5) -0.0056(5)
 N2 0.0098(5) 0.0154(5) 0.0271(7) -0.0006(5) 0.0016(5) -0.0010(4)
 N1 0.0105(5) 0.0121(5) 0.0171(6) -0.0004(4) 0.0006(4) -0.0006(4)
 N3 0.0124(5) 0.0145(5) 0.0250(6) -0.0007(5) 0.0010(5) -0.0004(4)
 C12 0.0122(6) 0.0126(5) 0.0152(6) 0.0000(5) -0.0001(5) -0.0008(4)
 C15 0.0113(6) 0.0167(6) 0.0187(7) -0.0002(5) 0.0001(5) -0.0022(5)
 C5 0.0121(5) 0.0152(5) 0.0146(6) 0.0004(5) -0.0010(5) 0.0022(4)
 C3 0.0106(5) 0.0124(6) 0.0151(6) -0.0011(4) 0.0001(5) 0.0007(4)
 C13 0.0151(6) 0.0141(6) 0.0169(6) 0.0012(5) 0.0010(5) 0.0017(5)
 C6 0.0135(6) 0.0147(6) 0.0154(6) 0.0013(5) -0.0008(5) 0.0007(4)
 C10 0.0133(6) 0.0197(6) 0.0167(6) 0.0005(6) -0.0025(5) 0.0002(5)
 C11 0.0120(5) 0.0137(5) 0.0158(6) -0.0005(5) -0.0001(5) 0.0003(5)
 C8 0.0183(6) 0.0240(7) 0.0184(7) -0.0004(6) -0.0004(5) 0.0078(6)
 C14 0.0221(7) 0.0176(7) 0.0387(10) 0.0048(7) 0.0013(7) 0.0073(6)
 C7 0.0211(7) 0.0158(6) 0.0177(6) 0.0003(5) -0.0018(5) 0.0040(5)
 C2 0.0123(6) 0.0135(5) 0.0143(6) -0.0017(5) -0.0009(5) 0.0003(4)
 C9 0.0132(6) 0.0252(7) 0.0172(7) 0.0014(5) -0.0007(5) 0.0039(5)
 C1 0.0137(6) 0.0141(6) 0.0165(6) 0.0007(5) -0.0003(5) -0.0016(5)
 C4 0.0120(5) 0.0155(5) 0.0147(6) -0.0005(5) -0.0005(5) 0.0002(4)

_geom_special_details
;
 All esds (except the esd in the dihedral angle between two l.s. planes)
 are estimated using the full covariance matrix.  The cell esds are taken
 into account individually in the estimation of esds in distances, angles
 and torsion angles; correlations between esds in cell parameters are only
 used when they are defined by crystal symmetry.  An approximate (isotropic)
 treatment of cell esds is used for estimating esds involving l.s. planes.
;
loop_
  _geom_bond_atom_site_label_1
  _geom_bond_atom_site_label_2
  _geom_bond_distance
  _geom_bond_site_symmetry_2
  _geom_bond_publ_flag
 Cl1 C2 1.7820(15) . ?
 O3 C16 1.4514(17) . ?
 O3 C15 1.3421(18) . ?
 O2 C13 1.3350(19) . ?
 O2 C14 1.446(2) . ?
 O5 C15 1.200(2) . ?
 O4 C13 1.2021(19) . ?
 O1 C1 1.4473(19) . ?
 O1 C4 1.4480(17) . ?
 C16 H16A 0.99(3) . ?
 C16 H16B 0.91(3) . ?
 C16 H16C 0.95(3) . ?
 N2 N1 1.3459(17) . ?
 N2 N3 1.3132(17) . ?
 N1 C12 1.3639(17) . ?
 N1 C3 1.4681(17) . ?
 N3 C11 1.3621(18) . ?
 C12 C15 1.483(2) . ?
 C12 C11 1.3833(19) . ?
 C5 C6 1.400(2) . ?
 C5 C10 1.3862(19) . ?
 C5 C4 1.5143(19) . ?
 C3 C2 1.555(2) . ?
 C3 C4 1.560(2) . ?
 C3 H3 0.95(3) . ?
 C13 C11 1.485(2) . ?
 C6 C7 1.385(2) . ?
 C6 C1 1.515(2) . ?
 C10 C9 1.400(2) . ?
 C10 H10 0.96(3) . ?
 C8 C7 1.404(2) . ?
 C8 C9 1.395(2) . ?
 C8 H8 0.92(3) . ?
 C14 H14A 0.97(3) . ?
 C14 H14B 0.87(3) . ?
 C14 H14C 0.99(3) . ?
 C7 H7 0.97(3) . ?
 C2 C1 1.551(2) . ?
 C2 H2 0.93(3) . ?
 C9 H9 0.92(3) . ?
 C1 H1 0.94(3) . ?
 C4 H4 0.92(2) . ?

loop_
  _geom_angle_atom_site_label_1
  _geom_angle_atom_site_label_2
  _geom_angle_atom_site_label_3
  _geom_angle
  _geom_angle_site_symmetry_1
  _geom_angle_site_symmetry_3
  _geom_angle_publ_flag
 C15 O3 C16 114.84(12) . . ?
 C13 O2 C14 114.18(13) . . ?
 C1 O1 C4 97.39(11) . . ?
 O3 C16 H16A 102.1(17) . . ?
 O3 C16 H16B 107.3(16) . . ?
 O3 C16 H16C 108(2) . . ?
 H16A C16 H16B 109(2) . . ?
 H16A C16 H16C 112(3) . . ?
 H16B C16 H16C 117(3) . . ?
 N3 N2 N1 108.08(12) . . ?
 N2 N1 C12 110.52(12) . . ?
 N2 N1 C3 120.40(11) . . ?
 C12 N1 C3 129.07(12) . . ?
 N2 N3 C11 108.59(12) . . ?
 N1 C12 C15 126.12(13) . . ?
 N1 C12 C11 104.03(12) . . ?
 C11 C12 C15 129.78(13) . . ?
 O3 C15 C12 111.31(13) . . ?
 O5 C15 O3 125.23(14) . . ?
 O5 C15 C12 123.46(14) . . ?
 C6 C5 C4 104.73(12) . . ?
 C10 C5 C6 121.49(13) . . ?
 C10 C5 C4 133.36(13) . . ?
 N1 C3 C2 112.26(11) . . ?
 N1 C3 C4 112.38(12) . . ?
 N1 C3 H3 108.4(16) . . ?
 C2 C3 C4 100.92(11) . . ?
 C2 C3 H3 114.2(16) . . ?
 C4 C3 H3 108.5(16) . . ?
 O2 C13 C11 109.92(13) . . ?
 O4 C13 O2 125.72(14) . . ?
 O4 C13 C11 124.35(14) . . ?
 C5 C6 C1 104.91(12) . . ?
 C7 C6 C5 121.28(14) . . ?
 C7 C6 C1 133.57(14) . . ?
 C5 C10 C9 117.49(14) . . ?
 C5 C10 H10 122.9(15) . . ?
 C9 C10 H10 119.6(15) . . ?
 N3 C11 C12 108.77(12) . . ?
 N3 C11 C13 121.60(13) . . ?
 C12 C11 C13 129.57(13) . . ?
 C7 C8 H8 124.0(19) . . ?
 C9 C8 C7 121.10(15) . . ?
 C9 C8 H8 114.9(19) . . ?
 O2 C14 H14A 106.2(19) . . ?
 O2 C14 H14B 107.8(19) . . ?
 O2 C14 H14C 106.6(16) . . ?
 H14A C14 H14B 114(3) . . ?
 H14A C14 H14C 112(3) . . ?
 H14B C14 H14C 110(3) . . ?
 C6 C7 C8 117.49(15) . . ?
 C6 C7 H7 120.8(17) . . ?
 C8 C7 H7 121.7(17) . . ?
 Cl1 C2 H2 108.5(17) . . ?
 C3 C2 Cl1 113.02(10) . . ?
 C3 C2 H2 111.3(15) . . ?
 C1 C2 Cl1 113.12(10) . . ?
 C1 C2 C3 101.84(11) . . ?
 C1 C2 H2 109.0(16) . . ?
 C10 C9 H9 119.7(16) . . ?
 C8 C9 C10 121.11(14) . . ?
 C8 C9 H9 119.1(16) . . ?
 O1 C1 C6 101.89(12) . . ?
 O1 C1 C2 98.89(11) . . ?
 O1 C1 H1 114(2) . . ?
 C6 C1 C2 108.51(12) . . ?
 C6 C1 H1 119.2(18) . . ?
 C2 C1 H1 112(2) . . ?
 O1 C4 C5 102.04(11) . . ?
 O1 C4 C3 101.52(11) . . ?
 O1 C4 H4 111.7(14) . . ?
 C5 C4 C3 104.50(12) . . ?
 C5 C4 H4 120.1(14) . . ?
 C3 C4 H4 114.8(15) . . ?

loop_
  _geom_torsion_atom_site_label_1
  _geom_torsion_atom_site_label_2
  _geom_torsion_atom_site_label_3
  _geom_torsion_atom_site_label_4
  _geom_torsion
  _geom_torsion_site_symmetry_1
  _geom_torsion_site_symmetry_2
  _geom_torsion_site_symmetry_3
  _geom_torsion_site_symmetry_4
  _geom_torsion_publ_flag
 Cl1 C2 C1 O1 -162.04(9) . . . . ?
 Cl1 C2 C1 C6 -56.23(14) . . . . ?
 O2 C13 C11 N3 32.3(2) . . . . ?
 O2 C13 C11 C12 -150.96(16) . . . . ?
 O4 C13 C11 N3 -146.91(18) . . . . ?
 O4 C13 C11 C12 29.9(3) . . . . ?
 C16 O3 C15 O5 2.2(2) . . . . ?
 C16 O3 C15 C12 -178.36(13) . . . . ?
 N2 N1 C12 C15 178.08(14) . . . . ?
 N2 N1 C12 C11 0.86(18) . . . . ?
 N2 N1 C3 C2 -27.94(19) . . . . ?
 N2 N1 C3 C4 85.01(16) . . . . ?
 N2 N3 C11 C12 0.42(19) . . . . ?
 N2 N3 C11 C13 177.80(15) . . . . ?
 N1 N2 N3 C11 0.12(18) . . . . ?
 N1 C12 C15 O3 33.9(2) . . . . ?
 N1 C12 C15 O5 -146.68(18) . . . . ?
 N1 C12 C11 N3 -0.77(17) . . . . ?
 N1 C12 C11 C13 -177.87(16) . . . . ?
 N1 C3 C2 Cl1 -112.35(12) . . . . ?
 N1 C3 C2 C1 125.99(13) . . . . ?
 N1 C3 C4 O1 -89.61(13) . . . . ?
 N1 C3 C4 C5 164.58(11) . . . . ?
 N3 N2 N1 C12 -0.63(18) . . . . ?
 N3 N2 N1 C3 178.49(14) . . . . ?
 C12 N1 C3 C2 151.00(15) . . . . ?
 C12 N1 C3 C4 -96.05(18) . . . . ?
 C15 C12 C11 N3 -177.85(15) . . . . ?
 C15 C12 C11 C13 5.0(3) . . . . ?
 C5 C6 C7 C8 -0.2(2) . . . . ?
 C5 C6 C1 O1 31.85(14) . . . . ?
 C5 C6 C1 C2 -71.87(15) . . . . ?
 C5 C10 C9 C8 -0.5(2) . . . . ?
 C3 N1 C12 C15 -0.9(3) . . . . ?
 C3 N1 C12 C11 -178.17(14) . . . . ?
 C3 C2 C1 O1 -40.45(12) . . . . ?
 C3 C2 C1 C6 65.36(14) . . . . ?
 C6 C5 C10 C9 1.9(2) . . . . ?
 C6 C5 C4 O1 -31.64(15) . . . . ?
 C6 C5 C4 C3 73.79(14) . . . . ?
 C10 C5 C6 C7 -1.6(2) . . . . ?
 C10 C5 C6 C1 173.44(14) . . . . ?
 C10 C5 C4 O1 155.92(17) . . . . ?
 C10 C5 C4 C3 -98.65(19) . . . . ?
 C11 C12 C15 O3 -149.60(16) . . . . ?
 C11 C12 C15 O5 29.8(3) . . . . ?
 C14 O2 C13 O4 1.0(2) . . . . ?
 C14 O2 C13 C11 -178.18(15) . . . . ?
 C7 C6 C1 O1 -153.99(17) . . . . ?
 C7 C6 C1 C2 102.30(19) . . . . ?
 C7 C8 C9 C10 -1.2(3) . . . . ?
 C2 C3 C4 O1 30.17(12) . . . . ?
 C2 C3 C4 C5 -75.64(12) . . . . ?
 C9 C8 C7 C6 1.5(2) . . . . ?
 C1 O1 C4 C5 50.41(13) . . . . ?
 C1 O1 C4 C3 -57.33(12) . . . . ?
 C1 C6 C7 C8 -173.55(16) . . . . ?
 C4 O1 C1 C6 -50.40(12) . . . . ?
 C4 O1 C1 C2 60.78(12) . . . . ?
 C4 C5 C6 C7 -175.18(14) . . . . ?
 C4 C5 C6 C1 -0.12(16) . . . . ?
 C4 C5 C10 C9 173.35(16) . . . . ?
 C4 C3 C2 Cl1 127.79(10) . . . . ?
 C4 C3 C2 C1 6.13(13) . . . . ?

_shelx_res_file
;
TITL MGRAV3041_2 in Pca2(1)
CELL 0.71073 20.8077 10.5281 7.0437 90 90 90
ZERR 4 0.0017 0.0009 0.0006 0 0 0
LATT -1
SYMM -X,-Y,0.5+Z
SYMM 0.5-X,+Y,0.5+Z
SYMM 0.5+X,-Y,+Z
 
SFAC C H Cl N O
UNIT 64 56 4 12 20
 
L.S. 4 0 0
PLAN  20
TEMP -163(2)
MORE -1
BOND $H
fmap 2 53
acta 52
CONF
REM <HKL>Z:/CHE-XRAY-16P/C/C035/work/MGRAV3041_2.hkl</HKL>
 
WGHT    0.056400    0.148400
FVAR       0.12768
CL1   3    0.644715    0.635202    0.848170    11.00000    0.02433    0.01755 =
         0.01468   -0.00212   -0.00146    0.00423
O3    5    0.580500    0.239737    0.470309    11.00000    0.01067    0.01813 =
         0.02209    0.00211   -0.00186   -0.00246
O2    5    0.833798    0.055382    0.586879    11.00000    0.01443    0.01460 =
         0.02680    0.00160   -0.00076    0.00345
O5    5    0.624098    0.078345    0.637725    11.00000    0.01878    0.02085 =
         0.03572    0.01068   -0.00094   -0.00388
O4    5    0.744700   -0.022564    0.445557    11.00000    0.02372    0.01652 =
         0.03027   -0.00257   -0.00542   -0.00064
O1    5    0.673950    0.623343    0.299632    11.00000    0.01407    0.01875 =
         0.01619    0.00046    0.00323   -0.00140
C16   1    0.517809    0.181159    0.492640    11.00000    0.01170    0.02597 =
         0.02404    0.00078   -0.00073   -0.00558
N2    4    0.761485    0.403267    0.504189    11.00000    0.00985    0.01540 =
         0.02714   -0.00060    0.00161   -0.00104
N1    4    0.698844    0.373759    0.522222    11.00000    0.01049    0.01209 =
         0.01713   -0.00040    0.00063   -0.00056
N3    4    0.794441    0.296906    0.501184    11.00000    0.01237    0.01450 =
         0.02504   -0.00065    0.00097   -0.00043
C12   1    0.690841    0.245267    0.529154    11.00000    0.01220    0.01260 =
         0.01521    0.00004   -0.00010   -0.00081
C15   1    0.629025    0.177208    0.554113    11.00000    0.01132    0.01668 =
         0.01869   -0.00016    0.00012   -0.00216
C5    1    0.567009    0.595281    0.372791    11.00000    0.01214    0.01524 =
         0.01461    0.00037   -0.00101    0.00215
C3    1    0.650226    0.474486    0.534398    11.00000    0.01056    0.01245 =
         0.01506   -0.00109    0.00005    0.00073
C13   1    0.775132    0.063976    0.511234    11.00000    0.01512    0.01407 =
         0.01687    0.00122    0.00101    0.00170
C6    1    0.587320    0.708680    0.457510    11.00000    0.01354    0.01472 =
         0.01544    0.00128   -0.00085    0.00071
C10   1    0.502390    0.564878    0.357691    11.00000    0.01334    0.01974 =
         0.01669    0.00046   -0.00252    0.00016
C11   1    0.752697    0.197809    0.517047    11.00000    0.01199    0.01369 =
         0.01581   -0.00047   -0.00015    0.00033
C8    1    0.477936    0.768022    0.506009    11.00000    0.01834    0.02397 =
         0.01842   -0.00043   -0.00045    0.00777
C14   1    0.860825   -0.071117    0.582508    11.00000    0.02214    0.01758 =
         0.03873    0.00482    0.00126    0.00734
C7    1    0.543507    0.796690    0.525587    11.00000    0.02105    0.01576 =
         0.01775    0.00032   -0.00180    0.00404
C2    1    0.677683    0.599038    0.621016    11.00000    0.01232    0.01352 =
         0.01429   -0.00170   -0.00090    0.00030
C9    1    0.457851    0.653776    0.425200    11.00000    0.01318    0.02524 =
         0.01721    0.00139   -0.00074    0.00386
C1    1    0.659860    0.698222    0.466856    11.00000    0.01367    0.01405 =
         0.01648    0.00067   -0.00025   -0.00160
C4    1    0.628349    0.522159    0.334832    11.00000    0.01200    0.01551 =
         0.01473   -0.00049   -0.00049    0.00021
H16A  2    0.489415    0.241718    0.425068    11.00000    0.03109
H16B  2    0.518605    0.105938    0.428084    11.00000    0.01912
H16C  2    0.508144    0.177002    0.623595    11.00000    0.03461
H14A  2    0.898437   -0.068838    0.663419    11.00000    0.03838
H14B  2    0.868711   -0.090052    0.465216    11.00000    0.02532
H14C  2    0.827528   -0.128881    0.633168    11.00000    0.02548
H3    2    0.613961    0.441855    0.599019    11.00000    0.02021
H2    2    0.722409    0.595224    0.632217    11.00000    0.01962
H1    2    0.684577    0.772667    0.476603    11.00000    0.03436
H4    2    0.629480    0.461825    0.240974    11.00000    0.01039
H7    2    0.557956    0.875645    0.582203    11.00000    0.02557
H9    2    0.414401    0.635998    0.419077    11.00000    0.02398
H10   2    0.487401    0.484962    0.307539    11.00000    0.02420
H8    2    0.445125    0.820759    0.545596    11.00000    0.03495
HKLF 4
 
REM  MGRAV3041_2 in Pca2(1)
REM R1 =  0.0309 for    4893 Fo > 4sig(Fo)  and  0.0315 for all    4990 data
REM    282 parameters refined using      1 restraints
 
END  
     
WGHT      0.0564      0.1484 

REM Highest difference peak  0.404,  deepest hole -0.256,  1-sigma level  0.061
Q1    1   0.7607  0.1288  0.5202  11.00000  0.05    0.40
Q2    1   0.5973  0.5560  0.3529  11.00000  0.05    0.40
Q3    1   0.5776  0.6415  0.4400  11.00000  0.05    0.38
Q4    1   0.7208  0.2173  0.5328  11.00000  0.05    0.38
Q5    1   0.6606  0.2059  0.5328  11.00000  0.05    0.38
Q6    1   0.5369  0.5782  0.3744  11.00000  0.05    0.37
Q7    1   0.6438  0.7047  0.8454  11.00000  0.05    0.37
Q8    1   0.6953  0.3067  0.5241  11.00000  0.05    0.35
Q9    1   0.7772  0.2413  0.5184  11.00000  0.05    0.34
Q10   1   0.4820  0.6208  0.3670  11.00000  0.05    0.34
Q11   1   0.4685  0.7033  0.4812  11.00000  0.05    0.33
Q12   1   0.5632  0.7428  0.4920  11.00000  0.05    0.32
Q13   1   0.6430  0.5660  0.8427  11.00000  0.05    0.32
Q14   1   0.6206  0.7054  0.4781  11.00000  0.05    0.31
Q15   1   0.6240  0.1179  0.5710  11.00000  0.05    0.30
Q16   1   0.6626  0.5370  0.5820  11.00000  0.05    0.29
Q17   1   0.5133  0.7791  0.5186  11.00000  0.05    0.29
Q18   1   0.6001  0.2050  0.5062  11.00000  0.05    0.28
Q19   1   0.8052  0.0555  0.5491  11.00000  0.05    0.28
Q20   1   0.6776  0.6369  0.8270  11.00000  0.05    0.27

REM The information below was added by Olex2.
REM
REM R1 = 0.0309 for 4893 Fo > 4sig(Fo) and 0.0315 for all 20329 data
REM n/a parameters refined using n/a restraints
REM Highest difference peak 0.40, deepest hole -0.26
REM Mean Shift 0, Max Shift 0.

REM +++ Tabular Listing of Refinement Information +++
REM R1_all = 0.0315
REM R1_gt = 0.0309
REM wR_ref = 0.0794
REM GOOF = 1.092
REM Shift_max = 0
REM Shift_mean = 0
REM Reflections_all = 20329
REM Reflections_gt = 4893
REM Parameters = n/a
REM Hole = -0.26
REM Peak = 0.40
REM Flack = 0.060(11)

;
loop_
  _refln_index_h
  _refln_index_k
  _refln_index_l
  _refln_F_squared_meas
  _refln_F_squared_sigma
 0 0 1 -1.09 0.01
 0 0 2 934.33 28.16
 0 0 2 994.1 27.68
 0 0 -2 1000 27.04
 0 0 -3 -0.09 0
 0 0 3 -0.07 0.01
 0 0 3 -0.07 0.02
 0 0 -4 74.47 1.88
 0 0 4 74.08 2.03
 0 0 4 74.94 1.99
 0 0 5 0 0.01
 0 0 -5 -0.01 0.01
 0 0 5 -0.01 0.01
 0 0 6 65.46 1.84
 0 0 -6 66.64 1.71
 0 0 6 68.34 1.8
 0 0 7 -0.02 0.01
 0 0 -7 0 0.01
 0 0 8 10.11 0.33
 0 0 -8 9.75 0.31
 0 0 -9 0.01 0.02
 0 0 9 -0.02 0.01
 0 0 -10 5.58 0.21
 0 0 10 5.37 0.22
 0 -1 0 79.45 2.13
 0 -1 1 -0.14 0.01
 0 -1 -1 -0.16 0.01
 0 1 1 -0.16 0.01
 0 -1 -1 -0.16 0.01
 0 -1 -1 -0.17 0.01
 0 1 -1 -0.15 0.01
 0 -1 1 -0.19 0.01
 0 1 2 315.81 8.44
 0 -1 -2 335.83 7.98
 0 -1 2 315.85 8.61
 0 1 -2 320.21 7.97
 0 1 2 307.78 8.59
 0 -1 2 306.76 8.46
 0 1 3 -0.01 0
 0 1 -3 -0.01 0.01
 0 1 3 -0.01 0
 0 -1 3 -0.02 0
 0 -1 -3 -0.01 0
 0 -1 3 0.02 0.01
 0 -1 4 25.33 0.68
 0 -1 -4 25.05 0.65
 0 1 -4 23.66 0.64
 0 1 4 25.28 0.69
 0 -1 4 24.11 0.7
 0 1 4 25.04 0.67
 0 1 -5 0.01 0.01
 0 1 5 0 0.01
 0 -1 5 0 0.01
 0 1 5 0.01 0.01
 0 -1 5 0 0.01
 0 -1 -5 0.04 0.03
 0 -1 -6 25.86 0.71
 0 1 6 27.22 0.77
 0 1 6 27.47 0.74
 0 1 -6 25.89 0.71
 0 -1 6 27.25 0.77
 0 -1 6 27.05 0.74
 0 -1 -7 0.02 0.01
 0 1 -7 0.02 0.01
 0 1 7 0 0.01
 0 -1 7 -0.01 0.01
 0 -1 7 0.01 0.01
 0 1 -8 2.6 0.12
 0 -1 -8 2.63 0.12
 0 -1 8 2.88 0.13
 0 1 8 2.88 0.13
 0 -1 -9 0.02 0.02
 0 -1 9 0.01 0.02
 0 1 -9 0.01 0.02
 0 1 9 0 0.01
 0 1 10 2.83 0.14
 0 1 -10 2.9 0.14
 0 -1 10 2.78 0.15
 0 -1 -10 2.76 0.14
 0 -2 0 11.82 0.31
 0 2 0 11 0.29
 0 -2 0 11.26 0.31
 0 -2 -1 -0.11 0.01
 0 -2 -1 -0.09 0.01
 0 -2 1 -0.1 0.01
 0 -2 1 -0.09 0.01
 0 2 -1 -0.09 0.01
 0 -2 -1 -0.08 0.01
 0 -2 -2 151.76 3.76
 0 -2 2 146.67 4.1
 0 -2 2 144.83 4.03
 0 2 2 153.07 4.07
 0 -2 -2 147.73 3.99
 0 2 -2 153.93 3.74
 0 2 3 0.02 0.01
 0 -2 -3 0.07 0.02
 0 2 -3 0 0.01
 0 -2 3 0.03 0.02
 0 -2 -3 0.02 0.01
 0 -2 4 102.38 2.82
 0 -2 -4 104.27 2.61
 0 2 -4 101.18 2.61
 0 -2 4 103.6 2.77
 0 2 4 105.31 2.81
 0 2 4 105.26 2.76
 0 -2 5 -0.01 0.01
 0 2 5 0 0.01
 0 -2 5 0 0.01
 0 2 5 0 0.01
 0 -2 -5 0 0.01
 0 2 -5 0 0.01
 0 -2 -6 8.24 0.25
 0 2 -6 8.17 0.25
 0 -2 6 8.12 0.27
 0 -2 6 7.88 0.25
 0 2 6 8.43 0.26
 0 -2 7 -0.01 0.01
 0 2 -7 0.01 0.01
 0 2 7 -0.01 0.01
 0 -2 -7 0.01 0.01
 0 -2 7 0.01 0.01
 0 2 8 0.69 0.06
 0 -2 8 0.78 0.07
 0 -2 -8 0.69 0.07
 0 2 -8 0.71 0.07
 0 2 9 -0.01 0.01
 0 2 -9 -0.01 0.01
 0 -2 -9 -0.02 0.01
 0 -2 9 -0.01 0.01
 0 2 -10 0.11 0.05
 0 2 10 0.11 0.05
 0 -2 10 0.11 0.06
 0 -2 -10 0.06 0.02
 0 -3 0 102.65 2.8
 0 -3 0 107.44 2.86
 0 3 -1 0.01 0.01
 0 -3 1 -0.02 0.01
 0 -3 -1 -0.02 0.01
 0 -3 -1 -0.01 0.01
 0 -3 -1 -0.02 0.01
 0 -3 2 72.46 1.95
 0 -3 -2 71.42 1.96
 0 -3 2 71.72 1.92
 0 -3 -2 70.75 1.91
 0 -3 -2 73.39 1.81
 0 -3 -3 0 0.01
 0 3 3 0 0
 0 -3 3 0 0.01
 0 -3 -3 0.04 0.01
 0 3 -3 0 0.01
 0 -3 3 0 0.01
 0 3 -4 16.49 0.45
 0 -3 4 16.57 0.48
 0 -3 -4 15.97 0.45
 0 3 4 16.99 0.47
 0 3 4 16.91 0.46
 0 -3 4 17.3 0.47
 0 -3 5 -0.01 0.01
 0 3 5 0.02 0.01
 0 -3 -5 0.01 0.01
 0 -3 5 -0.02 0.01
 0 3 5 0.02 0.02
 0 3 -5 0.01 0.01
 0 3 -6 7.79 0.24
 0 -3 6 7.61 0.24
 0 -3 -6 7.48 0.23
 0 3 6 7.44 0.24
 0 -3 6 7.23 0.25
 0 3 -7 0 0.01
 0 -3 -7 0.01 0.01
 0 -3 7 -0.02 0.01
 0 -3 7 0 0.01
 0 3 7 -0.01 0.01
 0 -3 8 7.18 0.26
 0 -3 -8 7.42 0.24
 0 3 8 6.86 0.25
 0 3 -8 7.23 0.24
 0 3 -9 0 0.02
 0 -3 -9 -0.01 0.02
 0 3 9 0 0.01
 0 -3 9 0.01 0.02
 0 -3 -10 0.47 0.06
 0 3 -10 0.6 0.07
 0 -3 10 0.64 0.08
 0 3 10 0.65 0.07
 0 4 0 19.88 0.52
 0 -4 0 20.81 0.56
 0 -4 0 20.22 0.55
 0 -4 1 -0.04 0.02
 0 -4 -1 -0.03 0.01
 0 -4 -1 -0.03 0.01
 0 -4 -2 90.18 2.4
 0 -4 2 90.13 2.37
 0 -4 2 86.08 2.41
 0 4 -2 87.08 2.23
 0 -4 -2 87.65 2.23
 0 -4 -2 91.45 2.38
 0 -4 -3 0.03 0.02
 0 -4 -3 0.09 0.02
 0 -4 3 0 0.01
 0 4 -3 0.03 0.02
 0 -4 3 0 0.01
 0 4 4 77.91 2.06
 0 -4 -4 80.19 2.07
 0 4 4 76.83 2.1
 0 -4 4 75.14 2.11
 0 -4 -4 76.4 1.96
 0 4 -4 76.45 1.96
 0 -4 4 78.6 2.08
 0 -4 5 0 0.01
 0 4 5 0.01 0.01
 0 -4 -5 0.04 0.02
 0 4 -5 0.01 0.01
 0 -4 5 0 0.01
 0 4 5 0.01 0.01
 0 4 6 3.5 0.13
 0 -4 6 3.29 0.13
 0 4 -6 3.41 0.13
 0 -4 6 3.56 0.14
 0 -4 -6 3.35 0.13
 0 -4 7 0 0.01
 0 -4 -7 0 0.01
 0 4 7 0 0.01
 0 4 -7 0 0.01
 0 -4 7 0 0.01
 0 -4 8 1.68 0.09
 0 4 8 1.7 0.09
 0 -4 -8 1.51 0.09
 0 4 -8 1.67 0.1
 0 -4 8 1.85 0.11
 0 -4 -9 0.07 0.05
 0 4 -9 -0.01 0.01
 0 -4 9 0.01 0.02
 0 5 0 79.87 2.01
 0 -5 0 79.06 2.15
 0 -5 0 80.47 2.14
 0 -5 -1 0.02 0.01
 0 -5 -1 0.03 0.01
 0 -5 1 0.02 0.01
 0 -5 -1 0.01 0.01
 0 -5 1 -0.01 0.01
 0 -5 -2 21.15 0.57
 0 -5 -2 20.61 0.55
 0 -5 2 21.18 0.58
 0 -5 -2 20.28 0.57
 0 -5 2 21.3 0.58
 0 5 -2 20.49 0.55
 0 5 3 0.02 0.01
 0 -5 3 0.03 0.02
 0 5 -3 0 0.01
 0 -5 -3 0 0.01
 0 -5 -3 0.04 0.01
 0 -5 3 0 0.01
 0 -5 4 11.05 0.34
 0 5 4 11.26 0.33
 0 -5 -4 10.96 0.32
 0 -5 -4 12 0.32
 0 5 -4 11.17 0.32
 0 -5 4 11.14 0.34
 0 -5 -5 0.01 0.01
 0 5 -5 0 0.01
 0 -5 5 0 0.01
 0 -5 5 0.01 0.01
 0 5 5 0 0.01
 0 -5 6 11.14 0.34
 0 -5 -6 10.54 0.32
 0 5 -6 10.63 0.32
 0 -5 6 10.56 0.34
 0 5 6 10.9 0.33
 0 -5 -7 0.01 0.01
 0 -5 7 -0.01 0.01
 0 -5 7 0 0.01
 0 5 7 -0.01 0.01
 0 5 -7 0.07 0.04
 0 -5 8 3.83 0.16
 0 5 -8 3.98 0.16
 0 -5 8 4.19 0.18
 0 -5 -8 3.83 0.16
 0 5 -9 -0.01 0.02
 0 -5 -9 -0.01 0.01
 0 -5 9 -0.01 0.02
 0 -6 0 22.76 0.64
 0 -6 0 23.15 0.63
 0 6 0 23.38 0.61
 0 6 1 0 0.01
 0 -6 -1 -0.01 0.01
 0 -6 -1 0.01 0.01
 0 -6 1 -0.01 0.01
 0 6 -1 -0.01 0
 0 -6 1 0.03 0.01
 0 -6 -2 29.52 0.79
 0 -6 2 29.11 0.81
 0 6 -2 29.48 0.76
 0 -6 -2 28.48 0.76
 0 -6 -2 28.84 0.79
 0 -6 2 28.94 0.81
 0 -6 3 -0.01 0.01
 0 -6 -3 0.03 0.01
 0 -6 -3 0 0.01
 0 -6 3 0.01 0.01
 0 6 -3 0.01 0.01
 0 -6 -3 0 0.01
 0 6 3 0.08 0.02
 0 -6 -4 0.63 0.04
 0 6 4 0.54 0.04
 0 -6 -4 0.6 0.05
 0 -6 4 0.55 0.05
 0 6 -4 0.65 0.05
 0 -6 4 0.6 0.05
 0 -6 5 -0.01 0.01
 0 -6 5 0 0.01
 0 6 -5 0 0.01
 0 -6 -5 0 0.01
 0 6 5 -0.01 0.01
 0 -6 -6 0.7 0.06
 0 -6 6 0.73 0.06
 0 -6 6 0.77 0.06
 0 6 -6 0.68 0.06
 0 -6 7 0 0.02
 0 -6 7 0 0.01
 0 6 -7 0.08 0.04
 0 -6 -7 0 0.01
 0 -6 8 6.83 0.24
 0 6 -8 6.89 0.24
 0 -6 8 6.87 0.26
 0 -6 -8 6.91 0.24
 0 -6 9 0 0.02
 0 -6 -9 -0.01 0.02
 0 6 -9 0.01 0.02
 0 -7 0 96.23 2.61
 0 -7 0 99.1 2.63
 0 7 0 96.66 2.46
 0 -7 1 -0.01 0.01
 0 -7 -1 0 0
 0 -7 1 0.02 0.01
 0 7 -1 -0.01 0.01
 0 7 1 0 0.01
 0 -7 -1 0.01 0.01
 0 -7 -2 1.29 0.06
 0 -7 -2 1.23 0.06
 0 -7 2 1.52 0.07
 0 7 -2 1.27 0.07
 0 -7 2 1.31 0.06
 0 7 2 1.35 0.07
 0 -7 -2 1.19 0.05
 0 -7 3 0.07 0.02
 0 -7 -3 0.03 0.02
 0 -7 3 0.01 0.01
 0 7 -3 0 0.01
 0 -7 -3 0 0.01
 0 7 -4 30.64 0.8
 0 -7 -4 29.41 0.8
 0 -7 4 30.22 0.85
 0 -7 4 30.02 0.85
 0 7 -5 0 0.01
 0 -7 5 0.01 0.01
 0 -7 -5 0 0.01
 0 -7 5 0.01 0.01
 0 -7 -6 10.75 0.33
 0 7 -6 10.9 0.33
 0 -7 6 10.7 0.35
 0 -7 6 10.96 0.35
 0 -7 -7 0 0.01
 0 -7 7 0.01 0.02
 0 -7 7 0.01 0.01
 0 7 -7 0.09 0.04
 0 -7 8 0.16 0.05
 0 -7 -8 0.18 0.05
 0 -7 8 0.19 0.05
 0 7 -8 0.24 0.05
 0 -7 -9 0.02 0.02
 0 -7 9 0 0.02
 0 7 -9 -0.01 0.02
 0 8 0 0.26 0.03
 0 -8 0 0.2 0.02
 0 -8 0 0.24 0.03
 0 8 -1 0 0.01
 0 8 1 0.01 0.01
 0 -8 -1 0 0.01
 0 -8 1 0 0.01
 0 -8 1 0 0.01
 0 -8 2 44.24 1.26
 0 -8 -2 46.03 1.18
 0 -8 -2 47.7 1.25
 0 8 -2 44.68 1.18
 0 8 2 44.89 1.18
 0 -8 2 46.7 1.26
 0 -8 -3 0.04 0.03
 0 8 -3 0.01 0.01
 0 -8 -3 0.03 0.02
 0 -8 3 0 0.01
 0 -8 3 0.01 0.01
 0 8 -4 2.06 0.1
 0 -8 4 2.12 0.1
 0 -8 -4 2.13 0.1
 0 -8 4 2.06 0.1
 0 -8 5 0 0.01
 0 -8 5 0 0.01
 0 -8 -5 0 0.01
 0 8 -5 0.07 0.04
 0 -8 -6 4.13 0.16
 0 8 -6 3.94 0.16
 0 -8 6 3.93 0.17
 0 -8 6 3.79 0.16
 0 -8 -7 0 0.01
 0 -8 7 0.01 0.02
 0 -8 7 0 0.01
 0 8 -7 0.02 0.02
 0 -8 8 0.34 0.06
 0 -8 8 0.26 0.06
 0 -8 -8 0.39 0.06
 0 8 -8 0.48 0.06
 0 9 0 27.68 0.75
 0 -9 0 28.78 0.79
 0 9 1 0.01 0.01
 0 -9 -1 0 0.01
 0 9 -1 0 0.01
 0 -9 1 -0.01 0.01
 0 -9 2 5.32 0.19
 0 -9 -2 5.54 0.18
 0 9 2 5.52 0.19
 0 9 -2 5.25 0.18
 0 -9 2 5.56 0.18
 0 -9 3 0.01 0.01
 0 9 -3 -0.01 0.01
 0 -9 -3 -0.01 0.01
 0 -9 3 0.01 0.01
 0 9 3 0 0.01
 0 -9 -3 0 0.01
 0 9 -4 7.4 0.24
 0 -9 4 7.27 0.25
 0 -9 -4 7.41 0.24
 0 -9 4 7.85 0.26
 0 -9 5 -0.01 0.01
 0 -9 -5 0.01 0.01
 0 -9 5 -0.01 0.01
 0 9 -5 0.01 0.01
 0 -9 -6 0.45 0.06
 0 -9 6 0.46 0.06
 0 9 -6 0.42 0.06
 0 -9 6 0.4 0.06
 0 -9 7 -0.01 0.01
 0 9 -7 0.07 0.05
 0 -9 -7 -0.01 0.01
 0 -9 7 0.02 0.02
 0 -9 -8 0.82 0.08
 0 -9 8 0.86 0.08
 0 -9 8 0.81 0.08
 0 9 -8 0.88 0.08
 0 10 0 0.22 0.04
 0 -10 0 0.28 0.04
 0 -10 -1 0.02 0.01
 0 10 -1 0.06 0.04
 0 -10 1 0 0.01
 0 10 1 0.06 0.04
 0 -10 -2 4.72 0.16
 0 10 2 4.47 0.17
 0 -10 2 4.5 0.18
 0 10 -2 4.65 0.17
 0 -10 3 0 0.02
 0 10 -3 -0.03 0.01
 0 10 3 -0.01 0.01
 0 10 -4 8.22 0.27
 0 -10 4 7.73 0.26
 0 10 4 8.18 0.26
 0 -10 -4 8.03 0.26
 0 -10 4 8.43 0.28
 0 10 -5 0.02 0.01
 0 -10 -5 0.01 0.01
 0 -10 5 0 0.01
 0 -10 5 0 0.02
 0 10 -6 1.86 0.11
 0 -10 6 1.86 0.11
 0 -10 -6 1.7 0.1
 0 -10 6 1.7 0.1
 0 10 -7 -0.01 0.02
 0 -10 7 0.08 0.05
 0 -10 -7 0.01 0.02
 0 -10 7 0.02 0.02
 0 -11 0 3.54 0.14
 0 11 0 3.42 0.14
 0 11 1 0.01 0.01
 0 -11 1 -0.01 0.01
 0 -11 -1 0.01 0.01
 0 11 -1 0 0.01
 0 -11 -2 7.5 0.25
 0 11 -2 7.59 0.25
 0 11 2 7.56 0.25
 0 -11 2 7.52 0.26
 0 11 3 0 0.01
 0 -11 3 0.02 0.02
 0 11 -3 0.01 0.01
 0 -11 -4 5.11 0.19
 0 -11 4 4.94 0.2
 0 11 -4 5.03 0.19
 0 11 4 4.97 0.19
 0 -11 -5 0.08 0.04
 0 11 5 0 0.01
 0 -11 5 0 0.02
 0 11 -5 -0.01 0.01
 0 11 -6 4.26 0.18
 0 -11 -6 4.47 0.18
 0 -11 6 4.68 0.2
 0 -11 7 -0.01 0.02
 0 -11 -7 -0.01 0.02
 0 11 -7 -0.01 0.02
 0 -11 7 0 0.01
 0 -12 0 5.21 0.2
 0 12 0 5.3 0.2
 0 -12 -1 0.05 0.04
 0 12 1 -0.01 0.01
 0 12 -1 0.01 0.01
 0 -12 1 -0.01 0.01
 0 -12 2 5.02 0.19
 0 -12 -2 4.35 0.18
 0 12 2 5.06 0.19
 0 12 -2 5.02 0.19
 0 12 -3 0.01 0.02
 0 -12 3 0.01 0.02
 0 12 3 0.01 0.02
 0 12 -4 3.03 0.14
 0 12 4 2.71 0.14
 0 -12 4 2.93 0.15
 0 12 5 0 0.02
 0 -12 5 -0.02 0.02
 0 12 -5 -0.02 0.01
 0 12 -6 2.44 0.13
 0 -12 6 2.34 0.13
 0 12 6 2.44 0.13
 0 -12 -6 2.37 0.13
 0 13 0 5.57 0.21
 0 -13 0 5.18 0.2
 0 13 1 0 0.01
 0 -13 -1 0 0.01
 0 -13 1 -0.02 0.01
 0 13 -1 0.1 0.05
 0 13 -2 1.93 0.11
 0 13 2 1.67 0.1
 0 -13 2 1.86 0.11
 0 13 3 0.11 0.05
 0 -13 3 0 0.02
 0 13 -3 0.09 0.05
 0 13 -4 1.02 0.09
 0 -13 4 1.1 0.09
 0 13 4 1.18 0.09
 0 13 5 0.1 0.05
 0 13 -5 -0.01 0.02
 0 -13 5 0.03 0.02
 0 -14 0 1.3 0.09
 0 14 0 1.38 0.1
 0 -14 1 0 0.02
 0 -14 -1 -0.01 0.02
 0 14 1 -0.01 0.02
 0 14 -1 0.01 0.02
 0 14 -2 2.27 0.13
 0 -14 2 2.41 0.13
 0 14 2 2.13 0.12
 0 14 3 0.1 0.05
 0 14 -3 0 0.02
 0 -14 3 0.02 0.02
 0 14 -4 2.29 0.13
 0 14 4 2.05 0.12
 0 15 0 1.33 0.1
 0 -15 0 1.38 0.1
 0 -15 1 -0.01 0.02
 0 15 -1 -0.02 0.02
 0 15 1 -0.02 0.02
 0 15 2 8.66 0.3
 0 15 -2 8.61 0.3
 0 -15 2 8.58 0.31
 1 0 1 -0.09 0.01
 1 0 -1 -0.09 0.01
 -1 0 -1 -0.11 0.01
 -1 0 1 -0.06 0.01
 -1 0 1 -0.05 0.01
 1 0 -1 -0.08 0.01
 1 0 1 -0.08 0
 -1 0 -2 0.01 0.02
 1 0 2 -0.05 0
 -1 0 2 -0.01 0.01
 1 0 2 -0.04 0.01
 -1 0 2 -0.03 0.01
 1 0 -2 -0.03 0.01
 -1 0 3 0 0
 1 0 -3 -0.01 0
 -1 0 3 0.05 0.01
 -1 0 -3 -0.01 0
 1 0 3 0 0
 1 0 3 0 0
 -1 0 4 0.01 0.01
 1 0 -4 -0.01 0.01
 1 0 4 -0.01 0.01
 1 0 4 0 0.01
 -1 0 4 0.01 0.01
 -1 0 -4 0 0.01
 1 0 -5 0 0.01
 1 0 5 -0.01 0.01
 -1 0 5 0 0.01
 1 0 5 0.03 0.02
 -1 0 -5 0.01 0.01
 -1 0 5 0.02 0.02
 -1 0 6 0.01 0.01
 -1 0 -6 0 0.01
 -1 0 6 0.01 0.01
 1 0 -6 0.05 0.03
 1 0 6 0 0.01
 1 0 6 0 0.01
 -1 0 -7 -0.01 0.01
 1 0 7 0.01 0.01
 -1 0 7 0 0.01
 1 0 -7 0.01 0.01
 1 0 -8 -0.05 0.01
 -1 0 -8 -0.02 0.01
 1 0 8 0.01 0.01
 -1 0 8 -0.02 0.01
 -1 0 -9 0 0.02
 -1 0 9 0.01 0.02
 1 0 -9 -0.02 0.01
 1 0 9 -0.01 0.02
 -1 0 10 -0.02 0.02
 -1 0 -10 0 0.02
 1 0 -10 0.01 0.02
 1 0 10 0.01 0.02
 1 -1 0 26.13 0.71
 -1 -1 0 25.33 0.67
 -1 -1 0 28.25 0.7
 -1 1 0 24.82 0.65
 1 -1 0 25.18 0.69
 -1 -1 1 9.43 0.26
 -1 -1 1 9.67 0.27
 1 -1 -1 9.23 0.26
 1 -1 -1 9.97 0.25
 -1 1 -1 9.61 0.25
 1 -1 -1 9.49 0.27
 1 1 1 9.37 0.26
 1 1 -1 9.23 0.25
 1 -1 1 9.86 0.27
 -1 -1 -1 9.48 0.25
 -1 -1 -1 9.49 0.26
 1 -1 1 9.47 0.26
 1 -1 -2 251.6 6.58
 -1 -1 2 262.62 6.99
 -1 1 -2 278.6 6.6
 1 -1 -2 270.76 6.98
 1 1 2 258.98 7.09
 -1 -1 2 262.83 7.12
 1 -1 -2 253.55 7.11
 1 1 2 268.39 6.95
 -1 1 2 273.24 6.98
 -1 1 2 249.97 7.09
 -1 -1 -2 255.45 6.57
 1 1 -2 256.53 6.58
 1 -1 2 248.87 7.1
 1 -1 2 269.04 6.98
 1 1 3 5.86 0.18
 1 -1 -3 6.1 0.17
 1 1 3 5.98 0.17
 -1 -1 3 5.93 0.18
 -1 -1 3 5.59 0.18
 -1 1 -3 6.23 0.17
 1 -1 3 6.13 0.18
 -1 1 3 5.84 0.18
 -1 1 3 5.97 0.17
 1 1 -3 6.28 0.17
 1 -1 3 6.27 0.18
 -1 -1 -3 6.09 0.17
 -1 1 -4 57.53 1.49
 1 1 4 60.09 1.56
 -1 -1 4 56.52 1.6
 1 -1 -4 59.27 1.49
 1 1 4 58.89 1.6
 -1 -1 4 59.86 1.57
 1 -1 4 58.59 1.61
 1 1 -4 56.54 1.49
 1 -1 4 60.52 1.57
 -1 1 4 57.12 1.6
 -1 -1 -4 58.36 1.49
 -1 1 4 59.71 1.57
 -1 -1 5 1.73 0.08
 1 1 5 1.71 0.06
 -1 1 -5 1.53 0.07
 1 1 5 1.73 0.08
 1 -1 -5 1.73 0.07
 -1 -1 5 1.64 0.07
 -1 -1 -5 1.64 0.08
 -1 1 5 1.76 0.07
 1 1 -5 1.67 0.07
 1 -1 5 1.74 0.07
 1 -1 5 1.61 0.08
 -1 1 5 1.77 0.08
 -1 -1 6 6.06 0.2
 1 1 6 6.07 0.19
 1 -1 -6 6.24 0.2
 -1 -1 6 6.11 0.21
 -1 1 -6 6.22 0.2
 1 1 6 6.09 0.21
 1 1 -6 6.48 0.2
 -1 1 6 6.2 0.21
 -1 -1 -6 6.11 0.2
 -1 1 6 6.04 0.19
 1 -1 6 5.86 0.19
 1 -1 6 6.56 0.21
 -1 -1 7 1.45 0.09
 1 -1 -7 1.49 0.08
 -1 -1 7 1.43 0.07
 -1 1 -7 1.55 0.08
 1 1 7 1.27 0.08
 1 1 -7 1.52 0.08
 -1 1 7 1.48 0.09
 -1 -1 -7 1.55 0.08
 1 -1 7 1.46 0.09
 1 -1 -8 11.95 0.36
 -1 1 -8 12.24 0.36
 -1 -1 8 12.2 0.39
 1 1 8 11.99 0.38
 1 1 -8 11.46 0.36
 -1 1 8 11.85 0.38
 -1 -1 -8 12.05 0.36
 1 -1 8 12.06 0.39
 1 1 9 1.92 0.11
 1 -1 -9 1.99 0.11
 -1 1 -9 2.1 0.11
 -1 -1 9 1.88 0.12
 1 -1 9 2.01 0.12
 -1 -1 -9 2.03 0.11
 1 1 -9 2.09 0.11
 -1 1 9 1.95 0.12
 1 -1 -10 3.09 0.14
 1 1 10 3.21 0.15
 -1 -1 10 2.89 0.15
 -1 1 -10 2.94 0.14
 -1 1 10 3.1 0.15
 1 1 -10 2.89 0.14
 1 -1 10 3.26 0.16
 -1 -1 -10 3.16 0.15
 1 -2 0 152.83 4.03
 -1 2 0 143.46 3.74
 -1 -2 0 145.25 3.96
 1 -2 0 154.66 3.97
 -1 -2 0 148.86 3.75
 1 2 0 144.71 3.74
 -1 -2 1 64.19 1.7
 1 2 1 59.83 1.73
 1 -2 -1 68.86 1.74
 1 -2 -1 70.88 1.72
 1 -2 -1 68.07 1.61
 -1 2 -1 61.53 1.6
 -1 -2 1 62.75 1.74
 1 -2 1 62.17 1.7
 -1 -2 -1 63.76 1.71
 1 2 -1 62.54 1.6
 1 -2 1 57.6 1.73
 -1 -2 -1 62.75 1.6
 1 -2 -2 59.54 1.57
 -1 -2 2 56.97 1.57
 -1 2 -2 59.1 1.46
 1 2 2 56.72 1.57
 1 -2 -2 56.78 1.45
 -1 -2 2 57.66 1.54
 1 -2 -2 57.76 1.54
 1 2 -2 59.84 1.45
 1 -2 2 57.9 1.57
 1 -2 2 55.68 1.54
 -1 -2 -2 57.06 1.54
 -1 -2 -2 57.96 1.46
 -1 -2 3 4.96 0.16
 1 -2 -3 5.46 0.16
 1 2 3 5.28 0.15
 1 -2 -3 5.34 0.15
 -1 2 -3 5.23 0.16
 -1 -2 3 5.21 0.17
 1 2 3 5.22 0.16
 1 -2 3 5.31 0.17
 -1 2 3 5.24 0.15
 1 -2 3 5.44 0.16
 1 2 -3 5.41 0.15
 -1 2 3 5.15 0.16
 -1 -2 -3 5.41 0.16
 -1 -2 4 57.63 1.59
 1 2 4 56.98 1.54
 -1 2 -4 56.24 1.47
 -1 -2 4 59.02 1.56
 1 -2 -4 56.85 1.47
 1 2 4 59.39 1.58
 -1 2 4 58.43 1.58
 -1 -2 -4 56.78 1.47
 1 -2 4 56.39 1.59
 1 -2 4 59.33 1.55
 1 2 -4 57.88 1.47
 -1 2 4 58.63 1.55
 1 2 5 16.16 0.44
 1 -2 -5 15.28 0.43
 1 2 5 16.06 0.46
 -1 2 -5 15.35 0.43
 -1 -2 5 15.65 0.47
 -1 -2 5 15.93 0.45
 1 -2 5 15.95 0.47
 1 2 -5 15.88 0.43
 -1 2 5 15.53 0.46
 -1 2 5 16.15 0.44
 -1 -2 -5 15.92 0.43
 1 -2 5 15.53 0.45
 -1 2 -6 4.65 0.16
 -1 -2 6 4.21 0.16
 1 -2 -6 4.52 0.15
 1 2 6 4.22 0.16
 -1 -2 6 4.18 0.15
 1 -2 6 4.47 0.15
 1 2 -6 4.58 0.15
 -1 2 6 4.4 0.16
 -1 -2 -6 4.34 0.15
 -1 2 6 4.37 0.14
 1 -2 6 4.28 0.16
 1 2 7 1.77 0.09
 1 -2 -7 1.76 0.09
 -1 -2 7 1.86 0.08
 -1 -2 7 1.77 0.1
 -1 2 -7 1.65 0.09
 -1 -2 -7 1.61 0.09
 1 2 -7 1.66 0.09
 1 -2 7 1.81 0.1
 -1 2 7 1.76 0.09
 1 -2 7 1.79 0.08
 -1 2 -8 5.12 0.19
 1 2 8 5.13 0.19
 1 -2 -8 4.88 0.18
 -1 -2 8 5.09 0.2
 1 -2 8 5.07 0.2
 1 2 -8 4.74 0.18
 -1 -2 -8 5.03 0.19
 -1 2 8 4.69 0.19
 1 2 9 0.41 0.06
 -1 2 -9 0.59 0.07
 -1 -2 9 0.57 0.07
 1 -2 -9 0.49 0.06
 -1 2 9 0.5 0.06
 1 -2 9 0.52 0.07
 1 2 -9 0.48 0.06
 -1 -2 -9 0.45 0.06
 1 2 10 1.75 0.11
 -1 2 -10 1.56 0.1
 1 -2 -10 1.64 0.1
 -1 -2 10 1.84 0.12
 -1 -2 -10 1.51 0.1
 1 2 -10 1.66 0.1
 -1 2 10 1.81 0.11
 1 -2 10 1.75 0.12
 1 -3 0 25.13 0.67
 -1 -3 0 24.84 0.67
 1 -3 0 24.71 0.67
 -1 3 0 25.13 0.63
 -1 -3 0 23.95 0.67
 1 -3 -1 18.38 0.5
 1 -3 -1 18.65 0.47
 -1 3 -1 18.16 0.47
 1 -3 -1 18.51 0.5
 -1 -3 1 18.62 0.51
 1 3 -1 18.01 0.47
 -1 -3 -1 18.44 0.5
 1 -3 1 18.87 0.5
 1 -3 1 18.19 0.51
 -1 -3 -1 18.03 0.5
 -1 -3 -1 18.12 0.47
 1 -3 -2 48.52 1.23
 1 -3 -2 47.6 1.32
 -1 -3 2 49.7 1.31
 1 -3 -2 46.86 1.3
 1 3 2 48.48 1.32
 -1 -3 2 48.54 1.32
 -1 3 -2 49.32 1.23
 1 3 -2 50.17 1.23
 1 -3 2 48.87 1.31
 -1 -3 -2 48.42 1.29
 1 -3 2 48.35 1.33
 -1 -3 -2 48.29 1.23
 -1 3 -3 6.08 0.18
 1 3 3 6.26 0.18
 1 -3 -3 6.31 0.18
 -1 -3 3 6.08 0.19
 1 -3 -3 6.37 0.18
 1 -3 -3 6.12 0.19
 -1 -3 3 6.29 0.19
 1 -3 3 5.92 0.19
 1 3 -3 6.26 0.18
 -1 -3 -3 6.07 0.18
 -1 3 3 6.21 0.19
 -1 -3 -3 6.31 0.18
 1 3 4 11.36 0.3
 1 -3 -4 10.21 0.29
 1 -3 -4 10.01 0.28
 -1 -3 4 9.33 0.3
 -1 3 -4 9.9 0.29
 1 3 4 10.18 0.28
 -1 -3 4 10.04 0.3
 -1 -3 -4 9.57 0.28
 -1 3 4 10.25 0.29
 1 -3 4 10.53 0.3
 -1 3 4 10.28 0.3
 1 3 -4 10.15 0.28
 1 -3 -5 1.42 0.07
 -1 3 -5 1.6 0.07
 1 3 5 1.47 0.07
 1 3 5 1.48 0.05
 -1 -3 5 1.88 0.08
 -1 -3 5 1.41 0.08
 1 -3 5 1.45 0.07
 1 -3 5 1.48 0.08
 -1 3 5 1.43 0.06
 1 3 -5 1.52 0.07
 -1 3 5 1.4 0.07
 -1 -3 -5 1.51 0.07
 -1 -3 6 0.88 0.06
 -1 3 -6 0.9 0.06
 1 3 6 0.82 0.06
 -1 -3 6 0.85 0.06
 1 -3 -6 0.8 0.06
 1 -3 6 0.85 0.06
 1 3 -6 0.9 0.06
 -1 3 6 0.82 0.06
 -1 -3 -6 0.82 0.06
 1 -3 6 0.82 0.05
 -1 -3 7 0.8 0.07
 -1 3 -7 0.64 0.06
 -1 -3 7 0.74 0.06
 1 -3 -7 0.77 0.06
 1 3 7 0.69 0.06
 -1 3 7 0.71 0.06
 1 3 -7 0.82 0.06
 -1 -3 -7 0.75 0.06
 1 -3 7 0.65 0.06
 1 -3 7 0.73 0.05
 1 3 8 1.26 0.08
 -1 3 -8 1.21 0.08
 1 -3 -8 1.44 0.09
 -1 -3 8 1.24 0.09
 1 -3 8 1.28 0.09
 1 3 -8 1.15 0.08
 -1 -3 -8 1.39 0.09
 -1 3 8 1.11 0.08
 -1 3 -9 0.52 0.07
 1 -3 -9 0.69 0.07
 1 3 9 0.55 0.07
 -1 -3 9 0.59 0.07
 -1 -3 -9 0.55 0.07
 1 3 -9 0.64 0.07
 -1 3 9 0.57 0.07
 1 -3 9 0.6 0.07
 -1 -3 10 0.39 0.07
 1 -3 -10 0.36 0.06
 -1 3 -10 0.5 0.07
 1 3 -10 0.45 0.06
 -1 3 10 0.49 0.07
 1 -3 10 0.44 0.07
 -1 -3 -10 0.5 0.07
 1 -4 0 3.14 0.11
 -1 -4 0 3.23 0.1
 1 4 0 3.24 0.1
 -1 4 0 3.3 0.1
 1 -4 0 3.32 0.1
 -1 -4 0 3.51 0.11
 -1 -4 1 2.64 0.09
 1 -4 -1 2.71 0.08
 -1 -4 1 2.59 0.09
 -1 4 -1 2.84 0.09
 1 -4 -1 2.77 0.09
 -1 -4 -1 2.62 0.09
 1 -4 1 2.67 0.09
 1 -4 1 2.74 0.09
 -1 -4 -1 2.67 0.08
 1 4 -1 2.74 0.09
 -1 -4 -1 2.7 0.09
 -1 4 -2 25.13 0.65
 -1 -4 2 25.57 0.7
 1 -4 -2 25.73 0.65
 -1 -4 2 24.26 0.7
 1 4 2 25.1 0.69
 1 -4 -2 25.85 0.69
 1 -4 -2 24.38 0.69
 1 -4 2 25.79 0.7
 1 -4 2 24.85 0.7
 1 4 -2 25.17 0.65
 -1 -4 -2 25.97 0.65
 -1 -4 -2 25.5 0.68
 -1 -4 3 43.04 1.2
 1 4 3 43.79 1.19
 1 -4 -3 44.71 1.17
 1 -4 -3 41.69 1.12
 1 -4 -3 45.08 1.19
 -1 -4 3 44.74 1.19
 -1 4 -3 42.99 1.12
 1 4 -3 41.75 1.11
 -1 -4 -3 45.14 1.17
 1 -4 3 44.74 1.19
 -1 4 3 43.14 1.19
 -1 -4 -3 43.76 1.12
 1 -4 3 43.24 1.2
 1 4 4 10.23 0.28
 1 -4 -4 10.03 0.28
 -1 -4 4 9.93 0.3
 -1 -4 4 9.5 0.3
 1 4 4 9.89 0.29
 -1 4 -4 9.78 0.29
 1 -4 -4 10.7 0.29
 1 -4 4 9.83 0.31
 -1 -4 -4 10.47 0.28
 -1 4 4 10.14 0.29
 -1 -4 -4 9.52 0.28
 -1 4 4 10.17 0.3
 1 -4 4 10.18 0.3
 1 4 -4 9.85 0.28
 -1 -4 5 8.26 0.27
 -1 4 -5 7.82 0.25
 1 4 5 8.32 0.25
 1 -4 -5 7.97 0.24
 -1 -4 5 8.51 0.26
 1 -4 5 8.36 0.26
 -1 4 5 8.41 0.25
 -1 -4 -5 7.97 0.25
 -1 4 5 8.57 0.24
 1 4 -5 8.05 0.24
 1 -4 5 7.98 0.26
 1 -4 -6 0.33 0.04
 -1 4 -6 0.38 0.05
 -1 -4 6 0.3 0.04
 -1 -4 6 0.3 0.04
 1 4 6 0.36 0.04
 1 -4 6 0.42 0.04
 1 -4 6 0.46 0.05
 1 4 -6 0.33 0.04
 -1 -4 -6 0.34 0.04
 -1 4 6 0.44 0.04
 -1 -4 7 5.29 0.2
 1 -4 -7 5.34 0.19
 -1 -4 7 4.97 0.19
 1 4 7 5.42 0.19
 -1 4 -7 5.44 0.19
 -1 4 7 5.34 0.19
 -1 -4 -7 5.28 0.19
 1 -4 7 5.19 0.19
 1 4 -7 5.57 0.19
 1 -4 7 5.28 0.2
 1 -4 -8 1.86 0.1
 -1 -4 8 1.64 0.09
 1 4 8 1.79 0.1
 -1 4 -8 1.92 0.1
 -1 -4 8 2.01 0.11
 1 -4 8 2.05 0.11
 1 4 -8 1.85 0.1
 -1 4 8 1.71 0.1
 -1 -4 -8 2.11 0.11
 1 -4 -9 0.21 0.05
 -1 4 -9 0.22 0.06
 1 -4 9 0.1 0.06
 1 4 -9 0.1 0.05
 -1 4 9 0.14 0.05
 -1 -4 -9 0.17 0.05
 1 -5 0 58.19 1.59
 1 -5 0 58.15 1.58
 -1 -5 0 58.87 1.58
 -1 5 0 59 1.49
 1 5 0 59.25 1.49
 -1 -5 0 58.68 1.59
 -1 5 -1 8.48 0.24
 1 -5 -1 8.81 0.25
 1 -5 -1 8.47 0.24
 -1 -5 1 8.57 0.25
 -1 -5 1 8.63 0.26
 1 -5 -1 8.82 0.24
 -1 -5 -1 8.67 0.25
 -1 5 1 8.76 0.24
 1 -5 1 8.85 0.26
 1 -5 1 8.6 0.25
 -1 -5 -1 8.55 0.24
 1 5 -1 8.66 0.24
 1 5 2 0.19 0.01
 -1 -5 2 0.23 0.02
 -1 -5 2 0.2 0.03
 1 -5 -2 0.26 0.02
 1 -5 -2 0.28 0.02
 1 -5 -2 0.24 0.03
 -1 5 -2 0.29 0.03
 1 -5 2 0.25 0.03
 -1 -5 -2 0.28 0.02
 1 5 -2 0.3 0.03
 1 -5 2 0.23 0.02
 -1 -5 -2 0.28 0.02
 -1 -5 -2 0.28 0.03
 1 -5 -3 5.7 0.18
 1 5 3 5.79 0.17
 1 -5 -3 6.24 0.18
 1 -5 -3 5.95 0.18
 -1 -5 3 5.89 0.19
 -1 5 -3 5.79 0.18
 -1 -5 3 5.71 0.19
 1 -5 3 5.71 0.19
 -1 -5 -3 5.9 0.18
 1 5 -3 5.91 0.18
 -1 -5 -3 5.79 0.17
 1 -5 3 5.74 0.19
 -1 5 -4 14.7 0.4
 1 -5 -4 15.68 0.41
 -1 -5 4 14.01 0.42
 1 -5 -4 14.18 0.4
 1 5 4 14.66 0.41
 -1 -5 4 14.38 0.43
 -1 -5 -4 15.24 0.4
 -1 5 4 14.58 0.41
 1 -5 4 13.8 0.43
 -1 -5 -4 14.42 0.4
 1 -5 4 14.2 0.42
 1 5 -4 14.2 0.4
 1 -5 -5 17.99 0.51
 -1 5 -5 18.78 0.51
 1 5 5 19.5 0.53
 -1 -5 5 18.33 0.55
 -1 -5 5 18.89 0.54
 1 -5 5 18.16 0.55
 1 5 -5 19.02 0.51
 -1 5 5 19.26 0.54
 -1 -5 -5 18.64 0.51
 1 -5 5 18.72 0.54
 -1 5 -6 6.54 0.22
 -1 -5 6 6.52 0.22
 1 5 6 6.77 0.21
 1 -5 -6 6.59 0.21
 -1 -5 6 6.79 0.23
 1 -5 6 6.35 0.23
 1 5 -6 6.6 0.21
 -1 5 6 6.79 0.22
 -1 -5 -6 6.44 0.22
 1 -5 6 6.47 0.22
 1 -5 -7 7.69 0.25
 -1 -5 7 7.76 0.26
 1 5 7 7.53 0.26
 -1 5 -7 8.01 0.26
 -1 -5 7 7.77 0.27
 1 5 -7 7.47 0.25
 -1 -5 -7 7.95 0.26
 -1 5 7 7.63 0.25
 1 -5 7 8.05 0.28
 1 -5 7 7.96 0.26
 -1 -5 8 1.66 0.11
 -1 5 -8 1.67 0.1
 -1 -5 8 1.8 0.1
 1 -5 -8 1.71 0.1
 1 -5 8 1.94 0.11
 -1 -5 -8 1.64 0.1
 1 5 -8 1.69 0.1
 1 -5 8 1.7 0.1
 -1 5 -9 2.9 0.14
 -1 -5 9 2.99 0.15
 1 -5 -9 2.85 0.13
 -1 -5 -9 2.69 0.13
 1 5 -9 2.54 0.13
 1 -5 9 2.72 0.15
 1 -6 0 0.93 0.05
 -1 6 0 1.04 0.05
 1 -6 0 0.97 0.04
 1 6 0 0.98 0.05
 -1 -6 0 1.03 0.05
 -1 -6 0 0.94 0.04
 1 -6 -1 10.56 0.29
 1 -6 -1 9.83 0.29
 -1 -6 1 10.36 0.29
 -1 -6 1 9.95 0.3
 -1 6 -1 9.92 0.28
 1 6 1 9.95 0.28
 -1 -6 -1 10.41 0.29
 -1 -6 -1 10.21 0.28
 1 -6 1 10.4 0.29
 -1 -6 -1 10.11 0.28
 -1 6 1 10.55 0.28
 1 -6 1 9.44 0.3
 1 6 -1 9.81 0.28
 1 -6 -2 47.5 1.26
 -1 -6 2 47.35 1.27
 -1 -6 2 45.73 1.27
 1 -6 -2 48.79 1.26
 -1 6 -2 45.35 1.19
 1 -6 -2 45.53 1.19
 1 6 -2 45.7 1.19
 1 -6 2 46.13 1.28
 1 -6 2 42.63 1.26
 -1 -6 -2 47.97 1.26
 -1 -6 -2 47.88 1.25
 -1 -6 -2 47.04 1.19
 -1 6 -3 8.11 0.25
 1 6 3 8.72 0.24
 1 -6 -3 8.1 0.24
 -1 -6 3 8.21 0.26
 -1 -6 3 8.32 0.26
 1 -6 -3 8.29 0.25
 1 -6 -3 8.57 0.24
 1 -6 3 8.62 0.26
 -1 -6 -3 7.81 0.24
 -1 -6 -3 8.59 0.24
 1 6 -3 8.04 0.24
 1 -6 3 8.59 0.26
 1 -6 -4 10.96 0.32
 1 -6 -4 11.33 0.32
 -1 -6 4 10.99 0.34
 -1 6 -4 10.96 0.32
 -1 -6 4 11.39 0.34
 1 6 4 11.39 0.32
 -1 -6 -4 10.53 0.32
 1 -6 4 11.07 0.34
 1 6 -4 10.95 0.32
 1 -6 4 11.06 0.34
 -1 6 4 11.27 0.32
 -1 -6 5 0.92 0.06
 1 -6 -5 0.85 0.06
 -1 -6 5 0.8 0.06
 -1 6 -5 0.8 0.06
 1 -6 5 0.96 0.06
 -1 6 5 0.79 0.05
 1 -6 5 0.67 0.06
 -1 -6 -5 0.9 0.06
 1 6 -5 0.83 0.06
 -1 -6 6 0.52 0.05
 -1 6 -6 0.63 0.06
 -1 -6 6 0.48 0.06
 1 -6 -6 0.49 0.05
 1 6 -6 0.58 0.05
 1 -6 6 0.57 0.06
 1 -6 6 0.47 0.05
 -1 -6 -6 0.55 0.05
 -1 -6 7 7.72 0.27
 -1 -6 7 7.49 0.26
 -1 6 -7 7.62 0.25
 1 -6 -7 8.01 0.25
 1 -6 7 7.31 0.26
 1 -6 7 7.67 0.27
 1 6 -7 8.06 0.25
 -1 -6 -7 7.45 0.25
 -1 -6 8 0.66 0.07
 1 -6 -8 0.83 0.07
 -1 6 -8 0.99 0.08
 -1 -6 8 0.8 0.08
 -1 -6 -8 0.86 0.08
 1 -6 8 0.74 0.07
 1 -6 8 0.76 0.08
 1 6 -8 0.82 0.07
 -1 -6 9 6.89 0.27
 1 -6 -9 6.91 0.24
 -1 6 -9 6.85 0.25
 -1 -6 -9 7.23 0.25
 1 6 -9 6.96 0.24
 1 -6 9 7.03 0.27
 1 -7 0 1.31 0.07
 1 7 0 1.26 0.06
 -1 -7 0 1.27 0.06
 -1 7 0 1.46 0.07
 -1 -7 0 1.27 0.05
 1 -7 0 1.34 0.05
 -1 -7 1 2.3 0.08
 -1 -7 1 2.18 0.09
 1 -7 -1 2.28 0.09
 -1 7 -1 2.02 0.09
 1 -7 -1 2.29 0.07
 1 7 -1 2.24 0.09
 -1 -7 -1 2.14 0.09
 1 -7 1 2.2 0.09
 -1 -7 -1 2.22 0.07
 -1 7 1 2.26 0.09
 1 -7 1 2.21 0.08
 1 -7 -2 7.77 0.22
 -1 -7 2 7.37 0.24
 1 -7 -2 7.73 0.23
 -1 -7 2 7.7 0.23
 1 -7 -2 7.72 0.23
 -1 7 -2 7.57 0.23
 1 -7 2 7.65 0.23
 1 -7 2 7.47 0.24
 -1 7 2 7.51 0.23
 -1 -7 -2 7.67 0.23
 -1 -7 -2 7.59 0.23
 1 7 -2 7.61 0.23
 -1 -7 3 2.9 0.11
 1 -7 -3 2.74 0.1
 1 -7 -3 2.59 0.1
 -1 7 -3 2.64 0.11
 1 -7 3 2.73 0.11
 -1 -7 -3 2.68 0.11
 1 -7 3 2.67 0.11
 -1 -7 -3 2.82 0.1
 1 7 -3 2.55 0.1
 -1 -7 4 14.9 0.44
 1 -7 -4 14.57 0.41
 -1 -7 4 14.72 0.44
 1 -7 -4 15.33 0.42
 -1 7 -4 14.61 0.41
 -1 -7 -4 14.2 0.41
 1 -7 4 14.94 0.44
 1 -7 4 14.35 0.44
 1 7 -4 14.01 0.41
 -1 7 -5 0.16 0.04
 1 -7 -5 0.16 0.04
 -1 -7 5 0.16 0.04
 -1 -7 5 0.19 0.04
 -1 -7 -5 0.14 0.03
 1 -7 5 0.16 0.04
 1 -7 5 0.24 0.04
 1 7 -5 0.19 0.03
 -1 -7 6 1.25 0.08
 1 -7 -6 1.25 0.08
 -1 7 -6 1.25 0.08
 -1 -7 6 1.2 0.08
 1 7 -6 1.18 0.08
 -1 -7 -6 1.07 0.08
 1 -7 6 1.22 0.08
 1 -7 6 1.16 0.08
 -1 7 -7 1.13 0.08
 -1 -7 7 1.07 0.08
 -1 -7 7 1.04 0.08
 1 -7 -7 1.05 0.08
 -1 -7 -7 1.03 0.08
 1 -7 7 1.09 0.08
 1 -7 7 0.94 0.08
 1 7 -7 1.06 0.08
 1 -7 -8 0.12 0.05
 -1 7 -8 0.16 0.05
 -1 -7 8 0.16 0.05
 -1 -7 8 0.1 0.05
 1 -7 8 0.22 0.05
 -1 -7 -8 0.17 0.05
 1 7 -8 0.18 0.05
 1 -7 8 0.25 0.06
 -1 -7 9 1.45 0.11
 -1 7 -9 1.8 0.11
 1 -7 -9 1.66 0.1
 -1 -7 -9 1.56 0.1
 1 -7 9 1.47 0.11
 1 7 -9 1.71 0.11
 1 8 0 1.08 0.06
 -1 -8 0 1.17 0.06
 1 -8 0 1.02 0.06
 1 -8 0 1.08 0.05
 -1 8 0 1.05 0.06
 -1 -8 1 4.55 0.14
 1 -8 -1 4.44 0.15
 1 8 1 4.36 0.15
 -1 -8 1 4.52 0.16
 -1 8 -1 4.59 0.15
 1 -8 1 4.32 0.16
 -1 8 1 4.65 0.15
 1 8 -1 4.4 0.15
 -1 -8 -1 4.47 0.15
 1 -8 1 4.69 0.14
 1 8 2 2.8 0.11
 -1 8 -2 2.98 0.11
 -1 -8 2 2.76 0.1
 -1 -8 2 2.68 0.12
 1 -8 -2 2.93 0.11
 -1 -8 -2 2.72 0.1
 1 -8 2 2.98 0.11
 -1 8 2 2.71 0.11
 1 8 -2 2.8 0.11
 -1 -8 -2 2.9 0.11
 1 -8 2 2.59 0.11
 -1 8 -3 2.14 0.1
 -1 -8 3 2.21 0.09
 -1 -8 3 2.12 0.1
 1 -8 -3 2.26 0.09
 1 -8 -3 2.18 0.1
 1 -8 3 2.1 0.09
 -1 -8 -3 2.3 0.09
 -1 -8 -3 2.14 0.1
 1 8 -3 2.14 0.09
 1 -8 3 2.15 0.1
 1 -8 -4 7.62 0.24
 -1 8 -4 7.63 0.25
 -1 -8 4 7.71 0.26
 -1 -8 4 7.8 0.25
 1 -8 4 7.75 0.26
 -1 -8 -4 7.67 0.25
 1 8 -4 7.95 0.25
 1 -8 4 7.98 0.25
 1 -8 -5 0.34 0.05
 -1 8 -5 0.32 0.05
 -1 -8 5 0.43 0.05
 -1 -8 5 0.36 0.05
 1 -8 5 0.39 0.05
 1 -8 5 0.31 0.05
 1 8 -5 0.35 0.05
 -1 -8 -5 0.3 0.05
 -1 -8 6 4.33 0.18
 -1 8 -6 4.12 0.17
 -1 -8 6 4.3 0.17
 1 -8 -6 4.48 0.17
 1 8 -6 4.55 0.17
 -1 -8 -6 4.3 0.17
 1 -8 6 4.28 0.18
 1 -8 6 4.47 0.18
 -1 8 -7 1.78 0.1
 -1 -8 7 1.79 0.11
 -1 -8 7 1.57 0.1
 1 -8 -7 1.74 0.1
 -1 -8 -7 1.75 0.1
 1 -8 7 1.88 0.11
 1 8 -7 1.88 0.1
 1 -8 7 1.75 0.11
 -1 -8 8 1.15 0.09
 -1 -8 8 1.19 0.09
 1 -8 -8 1.2 0.09
 -1 8 -8 1.05 0.09
 1 8 -8 1.3 0.09
 -1 -8 -8 1.18 0.09
 1 -8 8 1.32 0.1
 1 -8 8 1.24 0.09
 -1 -9 0 10.94 0.33
 1 9 0 10.66 0.32
 1 -9 0 10.78 0.33
 -1 9 -1 10.43 0.31
 1 9 1 10.65 0.31
 -1 -9 1 10.27 0.33
 1 -9 -1 10.79 0.32
 -1 -9 -1 10.73 0.32
 1 -9 1 10.07 0.33
 1 9 -1 10.17 0.31
 1 -9 1 10.98 0.31
 -1 9 1 10.75 0.31
 -1 -9 2 11.2 0.36
 -1 9 -2 11.31 0.34
 1 9 2 11.4 0.34
 1 -9 -2 11.67 0.35
 -1 -9 2 12.11 0.34
 1 9 -2 11.57 0.34
 1 -9 2 11.7 0.36
 -1 -9 -2 12.09 0.35
 1 -9 2 12.09 0.35
 -1 9 2 11.8 0.34
 -1 9 -3 1.78 0.09
 1 -9 -3 1.9 0.08
 1 9 3 2.02 0.09
 1 -9 -3 1.76 0.09
 -1 -9 3 2.04 0.1
 -1 -9 3 1.96 0.09
 1 -9 3 2.09 0.1
 1 -9 3 2.12 0.09
 1 9 -3 1.72 0.09
 -1 9 3 1.98 0.09
 -1 -9 -3 1.75 0.09
 -1 -9 4 3.24 0.14
 -1 -9 4 3.15 0.13
 -1 9 -4 3.19 0.13
 1 -9 -4 3.01 0.13
 1 9 -4 3.28 0.13
 1 -9 4 3.41 0.13
 1 -9 4 3.46 0.15
 -1 -9 -4 3.17 0.13
 1 -9 -5 3.61 0.15
 -1 -9 5 3.63 0.16
 -1 -9 5 3.62 0.15
 -1 9 -5 3.85 0.15
 1 -9 5 3.5 0.15
 1 9 -5 3.6 0.15
 -1 -9 -5 3.81 0.15
 1 -9 5 3.7 0.16
 -1 9 -6 6.34 0.23
 -1 -9 6 6.07 0.23
 1 -9 -6 6.73 0.23
 -1 -9 6 6.08 0.23
 -1 -9 -6 6.49 0.23
 1 9 -6 6.49 0.22
 1 -9 6 6.03 0.23
 1 -9 6 6.52 0.24
 -1 -9 7 3.93 0.17
 -1 -9 7 3.61 0.16
 1 -9 -7 3.68 0.16
 -1 9 -7 3.59 0.16
 1 -9 7 3.71 0.17
 1 -9 7 3.65 0.16
 -1 -9 -7 3.91 0.16
 1 9 -7 3.47 0.16
 1 -9 -8 1.7 0.1
 -1 9 -8 1.51 0.1
 -1 -9 8 1.59 0.11
 -1 -9 8 1.57 0.11
 1 -9 8 1.69 0.11
 -1 -9 -8 1.66 0.1
 1 -9 8 1.52 0.1
 1 9 -8 1.39 0.1
 -1 -10 0 0.07 0.03
 1 -10 0 0.02 0.01
 -1 10 0 0.05 0.03
 1 10 0 0.04 0.01
 -1 10 -1 8.4 0.26
 -1 -10 1 8.67 0.28
 1 10 1 8.42 0.26
 1 -10 -1 7.74 0.26
 -1 10 1 8.23 0.26
 1 10 -1 8.34 0.26
 -1 -10 -1 8.41 0.27
 1 -10 1 8.28 0.27
 1 10 2 20.17 0.56
 -1 10 -2 20.14 0.56
 1 -10 -2 20.84 0.58
 -1 -10 2 19.63 0.59
 -1 -10 -2 20.6 0.58
 1 -10 2 19.18 0.59
 -1 10 2 19.94 0.56
 1 10 -2 20.6 0.56
 1 10 3 0.42 0.05
 -1 -10 3 0.36 0.05
 1 -10 -3 0.48 0.04
 -1 10 -3 0.38 0.05
 -1 -10 -3 0.48 0.05
 1 -10 3 0.42 0.06
 1 10 -3 0.53 0.05
 1 -10 3 0.39 0.04
 -1 10 3 0.33 0.05
 1 -10 -4 5.87 0.2
 -1 -10 4 5.53 0.2
 -1 -10 4 5.63 0.21
 1 10 4 5.54 0.2
 -1 10 -4 5.63 0.2
 1 10 -4 5.69 0.2
 -1 -10 -4 5.74 0.2
 1 -10 4 5.65 0.2
 -1 10 4 5.87 0.2
 1 -10 4 5.89 0.22
 -1 -10 5 4.21 0.17
 1 -10 -5 4.33 0.17
 -1 10 -5 4.25 0.17
 -1 -10 5 4.46 0.18
 -1 -10 -5 4.51 0.17
 1 -10 5 4.36 0.18
 1 -10 5 4.39 0.17
 1 10 -5 4.42 0.17
 -1 -10 6 0.85 0.07
 -1 10 -6 0.86 0.08
 1 -10 -6 0.84 0.07
 -1 -10 6 0.98 0.08
 1 -10 6 0.94 0.08
 1 10 -6 1.01 0.08
 1 -10 6 0.99 0.08
 -1 -10 -6 0.87 0.08
 -1 10 -7 4.1 0.18
 -1 -10 7 4.08 0.18
 1 -10 -7 4.02 0.17
 -1 -10 7 4.53 0.19
 1 -10 7 4.19 0.18
 1 -10 7 4.13 0.18
 -1 -10 -7 4.09 0.17
 1 10 -7 4.14 0.17
 1 -11 0 7.75 0.26
 1 11 0 7.93 0.26
 -1 11 0 7.78 0.26
 -1 -11 0 8 0.26
 1 -11 -1 2.82 0.12
 1 11 1 2.76 0.12
 -1 -11 1 2.84 0.13
 -1 11 -1 2.74 0.12
 -1 11 1 2.55 0.12
 1 11 -1 3.07 0.13
 1 -11 1 2.94 0.13
 -1 -11 -1 2.81 0.12
 -1 11 -2 1.37 0.09
 1 11 2 1.33 0.08
 1 -11 -2 1.27 0.08
 -1 -11 2 1.36 0.09
 1 11 -2 1.36 0.09
 -1 -11 -2 1.32 0.07
 1 -11 2 1.53 0.09
 -1 11 2 1.44 0.09
 1 11 3 0.68 0.07
 -1 11 -3 0.71 0.07
 -1 -11 3 0.72 0.07
 -1 11 3 0.72 0.07
 1 11 -3 0.75 0.07
 1 -11 3 0.88 0.07
 1 11 4 1.5 0.09
 -1 11 -4 1.53 0.1
 -1 -11 4 1.43 0.1
 -1 -11 -4 1.57 0.09
 -1 11 4 1.65 0.1
 1 -11 4 1.46 0.1
 1 11 -4 1.51 0.09
 -1 -11 5 1.65 0.11
 1 -11 -5 1.71 0.1
 1 11 5 1.65 0.1
 -1 11 -5 1.59 0.1
 -1 -11 -5 1.76 0.1
 -1 11 5 1.69 0.1
 1 -11 5 1.66 0.1
 1 11 -5 1.52 0.1
 1 -11 -6 3.44 0.15
 -1 11 -6 3.71 0.16
 -1 -11 6 3.43 0.17
 1 -11 6 3.36 0.16
 -1 11 6 3.33 0.15
 1 -11 6 3.28 0.15
 -1 -11 -6 3.38 0.15
 1 11 -6 3.65 0.16
 -1 -11 7 1.24 0.1
 -1 11 -7 1.35 0.1
 1 -11 -7 1.29 0.09
 1 11 -7 1.35 0.1
 1 -11 7 1.28 0.09
 -1 -11 -7 1.23 0.09
 1 -11 7 1.32 0.1
 1 12 0 5.19 0.19
 1 -12 0 5.26 0.2
 -1 -12 0 5.03 0.19
 -1 12 0 5.02 0.19
 1 12 1 1.38 0.09
 -1 12 -1 1.23 0.09
 1 -12 -1 1.47 0.09
 -1 -12 1 1.41 0.09
 -1 -12 -1 1.24 0.08
 1 -12 1 1.44 0.09
 1 12 -1 1.51 0.09
 -1 -12 2 3.28 0.15
 -1 12 -2 2.92 0.14
 1 12 2 3.17 0.14
 1 -12 -2 2.8 0.13
 1 -12 2 3.2 0.15
 1 12 -2 3.04 0.14
 -1 12 2 3.47 0.14
 -1 -12 3 0.73 0.07
 -1 12 -3 0.68 0.07
 1 12 3 0.64 0.06
 -1 12 3 0.77 0.07
 1 -12 3 0.65 0.07
 1 12 -3 0.66 0.07
 1 12 4 0.96 0.08
 -1 12 -4 1 0.08
 -1 -12 4 0.87 0.08
 -1 12 4 0.87 0.08
 1 12 -4 0.93 0.08
 1 -12 4 0.85 0.08
 1 12 5 1.41 0.09
 -1 12 -5 1.48 0.1
 -1 -12 5 1.35 0.1
 -1 -12 -5 1.36 0.09
 -1 12 5 1.53 0.1
 1 -12 5 1.43 0.1
 1 12 -5 1.3 0.09
 1 12 6 1.51 0.1
 1 -12 -6 1.45 0.1
 -1 -12 6 1.54 0.11
 -1 12 -6 1.55 0.1
 -1 12 6 1.54 0.1
 1 12 -6 1.71 0.11
 1 -12 6 1.48 0.11
 -1 -12 -6 1.5 0.1
 1 -13 0 0.84 0.07
 -1 13 0 0.89 0.07
 -1 -13 0 0.85 0.07
 1 13 0 0.92 0.08
 1 -13 -1 2.73 0.13
 -1 -13 1 2.7 0.13
 -1 13 -1 3.07 0.14
 1 13 1 2.83 0.13
 1 13 -1 2.99 0.14
 1 -13 1 2.88 0.14
 -1 -13 -1 2.82 0.13
 -1 13 1 2.61 0.13
 -1 -13 2 2.27 0.12
 1 13 2 2.29 0.12
 -1 13 -2 2.31 0.12
 1 -13 2 2.6 0.13
 1 13 -2 2.39 0.13
 -1 13 2 2.36 0.12
 1 13 3 9.72 0.32
 -1 13 -3 9.49 0.32
 -1 -13 3 10.17 0.34
 1 -13 3 9.6 0.34
 1 13 -3 9.81 0.32
 -1 13 3 9.91 0.32
 -1 -13 4 1.06 0.09
 -1 13 -4 0.97 0.09
 1 13 4 0.86 0.08
 1 13 -4 1.04 0.09
 1 -13 4 1.12 0.09
 -1 13 4 1 0.09
 -1 13 -5 2.32 0.13
 -1 -13 5 2.3 0.13
 1 13 5 2.35 0.13
 -1 13 5 2.34 0.13
 1 -13 5 2.23 0.13
 1 13 -5 2.49 0.13
 1 14 0 3.57 0.16
 -1 -14 0 3.46 0.16
 -1 14 0 3.88 0.17
 1 -14 0 3.75 0.16
 -1 -14 1 1.33 0.09
 -1 14 -1 1.23 0.09
 1 -14 -1 1.18 0.08
 1 14 1 1.35 0.1
 -1 14 1 1.27 0.1
 1 -14 1 1.26 0.09
 1 14 -1 1.39 0.1
 -1 -14 2 1.96 0.11
 -1 14 -2 1.84 0.11
 1 14 2 1.66 0.11
 -1 14 2 1.91 0.11
 1 -14 2 1.98 0.12
 1 14 -2 1.78 0.11
 1 14 3 1.29 0.1
 -1 14 -3 1.15 0.09
 -1 -14 3 1.22 0.1
 1 14 -3 1.42 0.1
 1 -14 3 1.24 0.09
 -1 14 3 1.27 0.1
 -1 14 -4 0.15 0.06
 1 14 4 0.15 0.05
 1 14 -4 0.29 0.06
 -1 14 4 0.23 0.06
 -1 -15 0 3.07 0.14
 1 -15 0 2.85 0.14
 -1 15 0 2.9 0.15
 1 15 0 2.94 0.15
 -1 15 -1 1.24 0.1
 1 15 1 1.36 0.1
 -1 -15 1 1.28 0.1
 1 15 -1 1.27 0.1
 -1 15 1 1.21 0.1
 1 -15 1 1.17 0.09
 -1 15 -2 1.91 0.12
 1 15 2 1.53 0.11
 -1 15 2 1.74 0.11
 1 15 -2 1.66 0.11
 2 0 1 142.87 3.83
 -2 0 -1 140.04 3.63
 2 0 -1 138.58 3.61
 2 0 -1 157.08 3.92
 2 0 -1 162.41 3.86
 2 0 1 135.52 3.9
 -2 0 1 129.44 3.84
 2 0 2 87.32 2.3
 -2 0 -2 87.85 2.15
 -2 0 2 83.8 2.29
 -2 0 2 84.48 2.32
 2 0 -2 87.2 2.15
 2 0 2 82.85 2.34
 -2 0 3 36.84 1.01
 -2 0 3 36.84 0.99
 2 0 3 37.15 0.98
 2 0 -3 37.56 0.93
 2 0 3 36.15 1.01
 -2 0 -3 35.95 0.94
 -2 0 4 36.85 1.03
 2 0 4 36.68 1.03
 2 0 -4 36.9 0.95
 -2 0 -4 36.98 0.96
 2 0 4 37.3 1
 -2 0 4 37.73 1.01
 2 0 -5 30.95 0.82
 -2 0 5 30.94 0.88
 -2 0 5 32.01 0.86
 2 0 5 31.99 0.85
 2 0 5 31.91 0.88
 -2 0 -5 30.67 0.82
 -2 0 6 2.84 0.12
 -2 0 -6 3.04 0.12
 -2 0 6 3.19 0.11
 2 0 6 3.35 0.11
 2 0 -6 3.1 0.12
 2 0 6 3.16 0.13
 -2 0 7 0.88 0.07
 -2 0 7 0.86 0.06
 -2 0 -7 0.98 0.07
 2 0 -7 0.93 0.06
 2 0 7 0.87 0.07
 -2 0 8 0.83 0.07
 2 0 8 0.81 0.07
 -2 0 -8 0.96 0.07
 2 0 -8 0.85 0.07
 2 0 -9 5.43 0.21
 -2 0 -9 6.21 0.22
 -2 0 9 6.09 0.23
 2 0 9 6.14 0.23
 2 0 -10 2.65 0.13
 2 0 10 2.55 0.14
 -2 0 10 2.56 0.14
 -2 0 -10 2.78 0.14
 2 -1 0 2.03 0.06
 -2 -1 0 1.99 0.06
 2 -1 0 2.1 0.06
 -2 1 0 2.09 0.06
 -2 -1 0 2.09 0.06
 2 -1 -1 45.18 1.16
 -2 1 -1 47.38 1.16
 2 1 1 44.5 1.25
 2 -1 -1 46.79 1.25
 2 -1 -1 47.6 1.23
 -2 -1 1 46.29 1.25
 -2 -1 1 46.69 1.23
 2 1 -1 46.05 1.25
 2 1 -1 44.91 1.16
 2 -1 1 45.19 1.25
 2 -1 1 47.49 1.26
 -2 -1 -1 46.16 1.16
 2 1 2 23.33 0.62
 -2 1 -2 24.06 0.6
 2 -1 -2 22.25 0.63
 2 -1 -2 23.79 0.59
 2 -1 -2 22.79 0.64
 2 1 2 23.26 0.64
 -2 -1 2 23.5 0.64
 2 1 -2 23.9 0.59
 2 -1 2 23.08 0.63
 -2 1 2 23.33 0.63
 -2 -1 -2 23.16 0.6
 2 -1 2 23.08 0.64
 2 1 3 35.45 0.94
 -2 -1 3 35.1 0.97
 -2 -1 3 35.25 0.95
 2 -1 -3 35.41 0.9
 -2 1 -3 34.81 0.9
 2 1 3 35.71 0.96
 2 -1 3 35.11 0.95
 -2 -1 -3 34.48 0.9
 2 -1 3 35.46 0.97
 -2 1 3 36.11 0.97
 2 1 -3 33.04 0.89
 -2 1 3 35.92 0.95
 -2 1 -4 15.65 0.42
 2 -1 -4 15.87 0.41
 2 1 4 16.07 0.44
 -2 -1 4 15.76 0.44
 -2 -1 4 15.23 0.45
 2 1 4 15.34 0.42
 -2 1 4 15.49 0.43
 2 -1 4 15.39 0.43
 -2 1 4 15.4 0.45
 -2 -1 -4 14.97 0.42
 2 -1 4 15.37 0.45
 2 1 -4 15.23 0.41
 2 1 5 0.34 0.02
 2 -1 -5 0.38 0.04
 -2 1 -5 0.32 0.04
 2 1 5 0.4 0.04
 -2 -1 5 0.42 0.04
 -2 -1 5 0.34 0.04
 2 1 -5 0.32 0.03
 2 -1 5 0.35 0.03
 -2 1 5 0.29 0.04
 -2 1 5 0.35 0.03
 -2 -1 -5 0.36 0.04
 2 -1 5 0.42 0.04
 2 -1 -6 5.15 0.17
 -2 -1 6 4.85 0.17
 -2 1 -6 4.78 0.17
 -2 -1 6 4.92 0.18
 2 1 6 5.07 0.18
 2 -1 6 4.88 0.16
 2 -1 6 4.7 0.18
 -2 1 6 5.01 0.16
 -2 1 6 5.05 0.18
 2 1 -6 5.08 0.17
 -2 -1 -6 4.96 0.17
 -2 -1 7 3.66 0.13
 -2 -1 7 3.78 0.15
 2 1 7 3.55 0.15
 -2 1 -7 3.59 0.14
 2 -1 -7 3.65 0.14
 2 -1 7 3.74 0.15
 -2 1 7 3.78 0.15
 2 1 -7 3.54 0.14
 -2 -1 -7 3.49 0.14
 -2 1 -8 0.76 0.07
 2 1 8 0.63 0.07
 2 -1 -8 0.78 0.06
 -2 -1 8 0.8 0.07
 2 1 -8 0.71 0.06
 -2 -1 -8 0.69 0.07
 -2 1 8 0.74 0.07
 2 -1 8 0.72 0.07
 -2 -1 9 1.53 0.1
 -2 1 -9 1.54 0.1
 2 -1 -9 1.28 0.09
 2 1 9 1.54 0.1
 -2 1 9 1.63 0.1
 -2 -1 -9 1.45 0.1
 2 -1 9 1.62 0.1
 2 1 -9 1.41 0.09
 -2 -1 10 0.56 0.08
 2 -1 -10 0.63 0.07
 -2 1 -10 0.6 0.07
 2 1 10 0.66 0.07
 -2 -1 -10 0.54 0.07
 2 1 -10 0.58 0.07
 2 -1 10 0.51 0.07
 -2 1 10 0.59 0.07
 2 -2 0 88.43 2.42
 -2 -2 0 86.46 2.4
 -2 -2 0 88.01 2.26
 2 -2 0 92.92 2.41
 2 2 0 89.46 2.26
 -2 -2 1 45.69 1.25
 2 2 1 44.89 1.25
 2 -2 -1 46.3 1.16
 -2 -2 1 48.02 1.24
 -2 2 -1 46.31 1.16
 2 -2 -1 46.63 1.23
 2 -2 -1 46.54 1.25
 -2 -2 -1 47.85 1.24
 2 2 -1 45.83 1.16
 2 -2 1 46.48 1.25
 -2 -2 -1 44.67 1.16
 2 -2 1 44.74 1.23
 2 2 2 60.76 1.65
 2 -2 -2 59.26 1.53
 -2 2 -2 62.81 1.54
 -2 -2 2 61.82 1.63
 2 -2 -2 58.98 1.65
 2 -2 -2 60.59 1.63
 -2 -2 2 64.07 1.66
 -2 -2 -2 60.52 1.54
 2 2 -2 60.42 1.53
 2 -2 2 60.72 1.63
 -2 -2 -2 60.59 1.62
 2 -2 2 60.58 1.66
 2 -2 -3 54.48 1.39
 2 -2 -3 54.64 1.5
 2 2 3 56.31 1.49
 -2 2 -3 54.62 1.39
 -2 -2 3 54.2 1.48
 -2 -2 3 55.79 1.5
 2 2 3 54.19 1.46
 2 -2 -3 53.86 1.47
 -2 -2 -3 55.11 1.39
 -2 2 3 57.01 1.47
 -2 2 3 55.23 1.5
 2 -2 3 54.44 1.5
 2 -2 3 56.03 1.47
 2 2 -3 52.8 1.39
 -2 -2 4 13.18 0.37
 -2 -2 4 13.12 0.38
 2 2 4 12.99 0.36
 2 -2 -4 12.86 0.35
 -2 2 -4 12.82 0.36
 2 2 4 13.29 0.38
 2 -2 4 12.88 0.38
 -2 2 4 13.19 0.37
 2 2 -4 12.94 0.35
 -2 2 4 13.14 0.38
 -2 -2 -4 13.16 0.36
 2 -2 4 12.96 0.37
 2 2 5 2.62 0.1
 -2 2 -5 2.44 0.1
 -2 -2 5 2.48 0.11
 2 2 5 2.69 0.08
 -2 -2 5 2.77 0.1
 2 -2 -5 2.61 0.1
 -2 2 5 2.7 0.09
 2 -2 5 2.51 0.1
 2 -2 5 2.69 0.11
 -2 -2 -5 2.81 0.11
 -2 2 5 2.68 0.1
 2 2 -5 2.57 0.1
 -2 -2 6 4.77 0.17
 -2 2 -6 4.73 0.17
 2 -2 -6 4.78 0.16
 2 2 6 4.94 0.17
 -2 -2 6 4.62 0.18
 2 2 -6 5.14 0.17
 -2 2 6 5.15 0.18
 -2 2 6 5.06 0.16
 -2 -2 -6 4.97 0.17
 2 -2 6 4.83 0.18
 2 -2 6 4.93 0.16
 -2 2 -7 3.5 0.14
 2 -2 -7 3.58 0.14
 -2 -2 7 3.58 0.15
 2 2 7 3.65 0.14
 -2 -2 7 3.56 0.14
 -2 -2 -7 3.66 0.14
 2 -2 7 3.44 0.14
 -2 2 7 3.49 0.14
 2 -2 7 3.52 0.15
 2 2 -7 3.51 0.14
 2 2 8 0.18 0.05
 2 -2 -8 0.2 0.05
 -2 2 -8 0.24 0.05
 -2 -2 8 0.22 0.05
 2 2 -8 0.27 0.05
 -2 -2 -8 0.22 0.05
 2 -2 8 0.17 0.05
 -2 2 8 0.19 0.05
 2 2 9 1.48 0.09
 -2 2 -9 1.31 0.09
 2 -2 -9 1.41 0.09
 -2 -2 9 1.47 0.1
 -2 -2 -9 1.28 0.09
 2 2 -9 1.41 0.09
 2 -2 9 1.28 0.1
 -2 2 9 1.32 0.09
 2 2 10 0.21 0.05
 -2 -2 10 0.38 0.07
 -2 2 -10 0.18 0.06
 2 -2 -10 0.15 0.05
 -2 -2 -10 0.14 0.06
 2 2 -10 0.2 0.06
 -2 2 10 0.22 0.06
 2 -2 10 0.27 0.06
 -2 3 0 169.86 4.26
 2 -3 0 180.69 4.54
 2 -3 0 143.93 4.55
 -2 -3 0 168.28 4.5
 -2 -3 0 171.82 4.54
 2 3 0 174.27 4.26
 2 -3 -1 70.07 1.75
 -2 3 -1 70.63 1.76
 -2 -3 1 70.76 1.91
 2 -3 -1 72.62 1.86
 2 -3 -1 67.59 1.89
 2 3 -1 67.5 1.75
 -2 -3 -1 70.32 1.76
 2 -3 1 69.46 1.87
 2 -3 1 70.86 1.91
 -2 -3 -1 68.99 1.88
 -2 -3 2 30.1 0.8
 2 -3 -2 28.72 0.75
 -2 3 -2 29.28 0.75
 -2 -3 2 29.03 0.81
 2 3 2 29.31 0.8
 2 -3 -2 28.56 0.8
 2 -3 -2 29.56 0.79
 -2 -3 -2 28.76 0.78
 2 -3 2 28.94 0.81
 -2 -3 -2 29.43 0.75
 2 3 -2 29.38 0.75
 2 -3 2 31.02 0.8
 -2 3 -3 7.36 0.21
 2 -3 -3 7.35 0.22
 2 3 3 8.44 0.21
 -2 -3 3 6.58 0.22
 2 3 3 7.01 0.2
 -2 -3 3 7 0.22
 2 -3 -3 7.49 0.21
 2 -3 -3 7.08 0.2
 2 -3 3 7.14 0.22
 2 3 -3 7.34 0.2
 2 -3 3 6.82 0.22
 -2 -3 -3 7.26 0.21
 -2 -3 -3 7.38 0.2
 -2 3 -4 9.11 0.26
 2 3 4 8.7 0.26
 2 3 4 8.68 0.24
 -2 -3 4 8.92 0.27
 2 -3 -4 8.89 0.25
 2 -3 -4 9.02 0.26
 -2 -3 4 8.42 0.27
 2 3 -4 8.89 0.25
 2 -3 4 8.46 0.27
 -2 3 4 9.1 0.27
 -2 3 4 8.82 0.26
 2 -3 4 9.2 0.26
 -2 -3 -4 8.88 0.26
 -2 -3 5 36.25 1.01
 -2 3 -5 34.61 0.94
 2 3 5 35.65 1
 -2 -3 5 36.69 0.99
 2 -3 -5 34.78 0.93
 -2 3 5 37.72 0.98
 -2 3 5 36.94 1
 2 -3 5 35.8 0.98
 2 -3 5 35.85 1.01
 2 3 -5 35.14 0.93
 -2 -3 -5 35.62 0.94
 -2 3 -6 6.46 0.21
 -2 -3 6 6.44 0.21
 -2 -3 6 6.55 0.23
 2 -3 -6 6.38 0.21
 2 3 6 6.72 0.22
 -2 3 6 6.53 0.22
 -2 3 6 6.83 0.2
 2 -3 6 6.32 0.22
 2 3 -6 6.69 0.21
 -2 -3 -6 6.66 0.21
 2 -3 6 6.24 0.21
 2 -3 -7 3.86 0.15
 2 3 7 3.92 0.15
 -2 -3 7 3.98 0.15
 -2 -3 7 3.85 0.16
 -2 3 -7 3.75 0.15
 2 -3 7 3.71 0.14
 -2 -3 -7 3.98 0.15
 2 3 -7 3.71 0.14
 -2 3 7 4.02 0.15
 2 -3 7 4.03 0.16
 -2 3 -8 1.87 0.1
 2 -3 -8 1.86 0.1
 -2 -3 8 1.82 0.11
 -2 -3 8 1.8 0.09
 2 3 8 1.85 0.1
 2 3 -8 1.8 0.1
 -2 3 8 1.81 0.1
 2 -3 8 1.98 0.11
 -2 -3 -8 1.8 0.1
 2 -3 -9 4.09 0.16
 -2 -3 9 3.99 0.18
 -2 3 -9 4.08 0.17
 2 3 9 3.92 0.17
 -2 -3 -9 4.02 0.17
 2 3 -9 4.03 0.16
 2 -3 9 4.23 0.18
 -2 3 9 4.02 0.17
 2 -3 -10 0.04 0.02
 -2 -3 10 0.04 0.02
 -2 3 -10 0.04 0.02
 2 -3 10 0.11 0.06
 -2 -3 -10 0.02 0.02
 -2 3 10 0.03 0.02
 -2 -4 0 10.95 0.3
 2 -4 0 10.5 0.3
 2 -4 0 10.53 0.3
 -2 -4 0 10.61 0.29
 -2 4 0 11 0.29
 2 -4 -1 69.14 1.85
 -2 -4 1 67.52 1.85
 2 -4 -1 69.32 1.83
 -2 4 -1 67.05 1.72
 2 -4 -1 66.56 1.72
 -2 -4 1 68.44 1.83
 2 4 -1 68.34 1.72
 -2 -4 -1 69.42 1.72
 2 -4 1 70.52 1.83
 2 -4 1 67.58 1.86
 -2 -4 -1 68.38 1.82
 2 4 2 1.74 0.06
 -2 4 -2 1.72 0.07
 -2 -4 2 1.61 0.07
 2 -4 -2 1.8 0.06
 2 -4 -2 1.79 0.06
 -2 -4 2 1.76 0.07
 2 -4 2 1.79 0.07
 2 -4 2 1.66 0.07
 2 4 -2 1.79 0.06
 -2 -4 -2 1.84 0.06
 -2 4 -3 18.59 0.51
 2 -4 -3 18.89 0.51
 -2 -4 3 19.75 0.54
 2 -4 -3 18.65 0.54
 -2 -4 3 20.46 0.54
 2 4 3 19.9 0.53
 2 -4 -3 18.93 0.53
 2 4 -3 17.82 0.5
 2 -4 3 19.72 0.55
 -2 -4 -3 19.05 0.52
 -2 -4 -3 18.39 0.51
 2 -4 3 19.89 0.54
 -2 -4 4 10.4 0.32
 2 -4 -4 10.39 0.3
 2 4 4 10.66 0.31
 2 4 4 10.72 0.29
 -2 4 -4 10.13 0.3
 -2 -4 4 10.67 0.32
 2 -4 -4 10.9 0.31
 -2 4 4 10.41 0.3
 -2 -4 -4 10.59 0.3
 2 -4 4 10.39 0.32
 2 4 -4 10.63 0.3
 2 -4 4 11.04 0.32
 -2 4 4 10.85 0.31
 -2 -4 -4 10.98 0.29
 2 -4 -5 9.33 0.27
 2 4 5 9.35 0.28
 -2 -4 5 9.14 0.3
 -2 4 -5 9.49 0.28
 -2 -4 5 9.11 0.29
 2 -4 -5 9.68 0.28
 -2 4 5 9.42 0.27
 2 -4 5 9.61 0.29
 -2 -4 -5 9.33 0.28
 -2 4 5 9.7 0.29
 2 4 -5 9.74 0.28
 2 -4 5 8.89 0.3
 2 -4 -6 6.98 0.22
 -2 4 -6 6.6 0.22
 2 4 6 7.01 0.22
 -2 -4 6 6.43 0.23
 -2 -4 6 6.74 0.22
 -2 -4 -6 6.71 0.22
 2 -4 6 6.73 0.23
 2 4 -6 6.72 0.21
 -2 4 6 6.59 0.22
 2 -4 6 6.48 0.22
 2 4 7 6.07 0.21
 -2 -4 7 6.22 0.22
 -2 4 -7 6.14 0.21
 2 -4 -7 5.95 0.2
 -2 -4 7 6.24 0.21
 -2 -4 -7 6.04 0.21
 2 -4 7 6.3 0.22
 2 4 -7 5.82 0.2
 2 -4 7 5.75 0.2
 -2 4 7 5.79 0.21
 2 -4 -8 1.3 0.08
 -2 -4 8 1.23 0.08
 -2 4 -8 1.22 0.08
 2 4 8 1.19 0.08
 -2 -4 8 1.27 0.09
 -2 -4 -8 1.15 0.08
 2 4 -8 1.17 0.08
 -2 4 8 1.12 0.08
 2 -4 8 1.11 0.08
 -2 -4 9 10.66 0.36
 -2 4 -9 11.03 0.34
 2 -4 -9 10.35 0.33
 -2 -4 -9 10.25 0.33
 2 -4 9 10.31 0.36
 -2 4 9 9.86 0.34
 2 4 -9 9.98 0.32
 -2 5 0 2.13 0.08
 -2 -5 0 2.27 0.08
 2 -5 0 2.2 0.08
 2 -5 0 2.15 0.07
 -2 -5 0 2.21 0.07
 -2 5 -1 4.45 0.13
 -2 -5 1 4.27 0.13
 2 -5 -1 4.61 0.13
 -2 -5 1 4.25 0.14
 2 -5 -1 4.38 0.14
 -2 5 1 4.34 0.13
 2 -5 1 4.21 0.14
 2 -5 1 4.21 0.14
 2 5 -1 4.53 0.13
 -2 -5 -1 4.31 0.13
 -2 -5 -1 4.39 0.13
 -2 5 -2 0.68 0.04
 -2 -5 2 0.64 0.04
 2 -5 -2 0.68 0.03
 -2 -5 2 0.57 0.04
 2 -5 -2 0.64 0.04
 -2 -5 -2 0.67 0.03
 2 5 -2 0.63 0.04
 2 -5 2 0.64 0.04
 -2 -5 -2 0.61 0.04
 2 -5 -3 14.31 0.39
 -2 -5 3 15.07 0.42
 -2 5 -3 14.56 0.4
 2 -5 -3 14.56 0.41
 -2 -5 3 14.67 0.42
 2 5 3 14.67 0.41
 2 -5 -3 14.94 0.41
 2 -5 3 15.13 0.42
 2 -5 3 13.78 0.42
 2 5 -3 14.64 0.4
 -2 -5 -3 14.07 0.4
 -2 -5 -3 14.64 0.4
 -2 5 -4 0.16 0.03
 -2 -5 4 0.16 0.03
 2 -5 -4 0.12 0.03
 2 5 4 0.16 0.02
 -2 -5 4 0.17 0.03
 2 -5 -4 0.15 0.03
 2 -5 -4 0.16 0.02
 2 5 -4 0.18 0.03
 -2 -5 -4 0.14 0.03
 2 -5 4 0.15 0.03
 -2 5 4 0.22 0.03
 2 -5 4 0.23 0.03
 2 -5 -5 0.35 0.04
 -2 5 -5 0.37 0.04
 -2 -5 5 0.34 0.05
 2 -5 -5 0.35 0.03
 2 5 5 0.4 0.03
 -2 -5 5 0.32 0.04
 2 -5 5 0.4 0.04
 -2 -5 -5 0.38 0.04
 2 5 -5 0.42 0.04
 2 -5 5 0.42 0.05
 -2 5 5 0.41 0.03
 -2 5 5 0.33 0.04
 -2 5 -6 2.82 0.12
 -2 -5 6 2.8 0.12
 2 -5 -6 2.69 0.11
 -2 -5 6 2.82 0.13
 2 5 6 2.84 0.11
 2 5 -6 2.89 0.12
 -2 -5 -6 2.87 0.12
 -2 5 6 2.74 0.11
 2 -5 6 2.62 0.12
 2 -5 6 2.73 0.12
 -2 -5 7 3.18 0.14
 -2 5 -7 3.69 0.14
 2 -5 -7 3.34 0.14
 -2 -5 7 3.44 0.15
 2 -5 7 3.3 0.14
 -2 5 7 3.24 0.13
 -2 -5 -7 3.37 0.14
 2 5 -7 3.34 0.14
 2 -5 7 3.31 0.15
 -2 5 -8 0.97 0.08
 -2 -5 8 1.2 0.09
 2 -5 -8 1.16 0.08
 -2 -5 8 1.11 0.08
 2 5 -8 1.19 0.08
 -2 5 8 1 0.07
 2 -5 8 1.24 0.09
 -2 -5 -8 1.07 0.08
 -2 -5 9 4.57 0.2
 -2 5 -9 4.88 0.19
 2 -5 -9 4.72 0.18
 2 -5 9 4.68 0.2
 -2 -5 -9 4.86 0.19
 2 5 -9 4.54 0.18
 -2 -6 0 0.03 0.02
 -2 -6 0 0.02 0.01
 2 -6 0 0.05 0.01
 2 6 0 0.03 0.02
 2 -6 0 0.03 0.02
 -2 6 0 0.01 0.01
 2 -6 -1 2.05 0.08
 -2 -6 1 2.2 0.07
 -2 6 -1 2.2 0.08
 -2 -6 1 2.04 0.09
 2 -6 -1 2.14 0.07
 -2 -6 -1 2.15 0.08
 2 -6 1 2.16 0.09
 2 6 -1 2.02 0.08
 -2 6 1 2.21 0.08
 2 -6 1 2.19 0.08
 -2 -6 -1 2.05 0.08
 2 -6 -2 16.1 0.44
 -2 -6 2 15.89 0.45
 2 -6 -2 16 0.45
 -2 6 -2 16 0.43
 -2 -6 2 15.67 0.45
 2 -6 -2 15.54 0.43
 2 6 2 15.51 0.43
 2 -6 2 15.98 0.45
 2 6 -2 15.65 0.43
 -2 -6 -2 16.17 0.44
 -2 -6 -2 15.66 0.43
 2 -6 2 15.25 0.45
 2 -6 -3 14.29 0.4
 2 -6 -3 14.87 0.41
 -2 -6 3 14.15 0.42
 -2 6 -3 13.75 0.4
 2 6 3 14.94 0.4
 2 -6 -3 14.74 0.41
 -2 -6 3 14.86 0.42
 -2 -6 -3 15.07 0.4
 2 -6 3 14.31 0.42
 -2 -6 -3 14.21 0.4
 2 6 -3 14.14 0.4
 2 -6 3 14.66 0.43
 -2 -6 4 2.27 0.1
 2 -6 -4 2.38 0.09
 -2 6 -4 2.21 0.1
 -2 -6 4 2.37 0.1
 2 -6 -4 2.31 0.09
 2 -6 -4 2.34 0.09
 2 6 -4 2.22 0.09
 2 -6 4 2.36 0.1
 -2 -6 -4 2.23 0.1
 -2 6 4 2.31 0.09
 2 -6 4 2.4 0.1
 -2 6 -5 2.48 0.11
 2 -6 -5 2.5 0.1
 -2 -6 5 2.36 0.11
 -2 -6 5 2.53 0.11
 2 -6 5 2.67 0.11
 -2 -6 -5 2.37 0.1
 2 6 -5 2.47 0.1
 -2 6 5 2.56 0.1
 2 -6 5 2.39 0.11
 -2 -6 6 0.24 0.05
 2 -6 -6 0.24 0.04
 -2 -6 6 0.22 0.04
 -2 6 -6 0.27 0.05
 2 -6 6 0.21 0.05
 2 6 -6 0.42 0.05
 -2 6 6 0.19 0.04
 -2 -6 -6 0.28 0.04
 2 -6 6 0.24 0.04
 -2 -6 7 3.95 0.17
 2 -6 -7 4.43 0.16
 -2 6 -7 4.3 0.17
 -2 -6 7 4.16 0.17
 2 -6 7 3.91 0.16
 2 -6 7 4.02 0.17
 -2 -6 -7 4.16 0.16
 2 6 -7 3.99 0.16
 -2 6 -8 1.2 0.09
 2 -6 -8 1.22 0.08
 -2 -6 8 1.34 0.1
 -2 -6 8 1.23 0.09
 2 -6 8 1.19 0.08
 -2 -6 -8 1.41 0.09
 2 -6 8 1.14 0.09
 2 6 -8 1.21 0.08
 -2 6 -9 0.22 0.06
 2 -6 -9 0.12 0.05
 -2 -6 9 0.08 0.06
 -2 -6 -9 0.17 0.06
 2 -6 9 0.2 0.06
 2 6 -9 0.1 0.05
 -2 -7 0 1.37 0.05
 -2 7 0 1.34 0.06
 2 7 0 1.33 0.06
 2 -7 0 1.44 0.05
 2 -7 0 1.3 0.07
 -2 -7 0 1.33 0.06
 2 -7 -1 12.15 0.35
 2 7 1 11.92 0.34
 2 -7 -1 12.36 0.34
 -2 -7 1 12.4 0.34
 -2 7 -1 11.81 0.34
 -2 -7 1 12.1 0.36
 2 -7 1 11.52 0.36
 2 7 -1 11.52 0.34
 2 -7 1 12.55 0.35
 -2 7 1 12.14 0.34
 -2 -7 -1 12.1 0.35
 -2 7 -2 3.77 0.13
 -2 -7 2 3.84 0.13
 2 -7 -2 3.82 0.13
 -2 -7 2 3.63 0.14
 2 -7 -2 3.9 0.13
 2 -7 -2 4 0.12
 2 -7 2 3.83 0.14
 2 7 -2 3.91 0.13
 2 -7 2 3.8 0.13
 -2 -7 -2 4.06 0.13
 -2 -7 -2 3.77 0.13
 -2 7 2 3.71 0.13
 -2 -7 3 8.72 0.26
 2 -7 -3 8.81 0.25
 -2 -7 3 8.24 0.27
 2 -7 -3 8.74 0.26
 -2 7 -3 8.03 0.26
 2 -7 -3 8.33 0.25
 -2 -7 -3 8.57 0.25
 -2 -7 -3 8.61 0.26
 2 -7 3 8.86 0.27
 2 -7 3 8.78 0.27
 2 7 -3 8.34 0.25
 2 -7 -4 11.76 0.34
 2 -7 -4 12.49 0.35
 -2 -7 4 12.3 0.36
 -2 7 -4 11.71 0.35
 -2 -7 4 11.54 0.37
 2 -7 4 12.05 0.37
 -2 -7 -4 11.68 0.34
 2 7 -4 11.73 0.34
 -2 7 4 12.03 0.35
 2 -7 4 11.79 0.37
 -2 -7 5 8.02 0.26
 -2 -7 5 8.43 0.26
 2 -7 -5 7.69 0.24
 -2 7 -5 7.29 0.25
 2 -7 5 7.68 0.26
 2 -7 5 7.84 0.26
 2 7 -5 7.61 0.24
 -2 -7 -5 7.53 0.25
 -2 -7 6 3.54 0.15
 2 -7 -6 3.33 0.14
 -2 7 -6 3.42 0.14
 -2 -7 6 3.84 0.15
 2 7 -6 3.56 0.14
 2 -7 6 3.57 0.15
 -2 -7 -6 3.59 0.15
 2 -7 6 3.71 0.15
 -2 -7 7 3.66 0.16
 2 -7 -7 3.79 0.15
 -2 7 -7 3.66 0.15
 -2 -7 7 3.55 0.16
 2 -7 7 3.47 0.15
 2 -7 7 3.41 0.16
 2 7 -7 3.4 0.14
 -2 -7 -7 3.63 0.15
 2 -7 -8 0.33 0.06
 -2 -7 8 0.37 0.06
 -2 7 -8 0.35 0.06
 -2 -7 8 0.3 0.06
 2 -7 8 0.43 0.06
 2 7 -8 0.26 0.05
 2 -7 8 0.32 0.06
 -2 -7 -8 0.3 0.06
 -2 -7 9 7.93 0.28
 -2 7 -9 7.83 0.27
 -2 -7 9 7.84 0.29
 2 -7 -9 7.72 0.27
 2 -7 9 7.86 0.3
 -2 -7 -9 7.85 0.27
 2 7 -9 7.89 0.27
 2 8 0 2.87 0.11
 2 -8 0 3.12 0.1
 -2 -8 0 2.94 0.11
 -2 8 0 2.87 0.11
 2 -8 0 2.83 0.11
 2 -8 -1 3.33 0.1
 2 8 1 3.01 0.12
 2 -8 -1 2.99 0.12
 -2 -8 1 2.91 0.12
 -2 8 -1 3.23 0.12
 -2 -8 1 3.05 0.1
 -2 -8 -1 3.27 0.12
 2 -8 1 2.94 0.12
 2 8 -1 3.05 0.12
 2 -8 1 3.04 0.11
 -2 8 1 2.82 0.11
 -2 -8 2 5.42 0.16
 2 -8 -2 4.96 0.17
 -2 8 -2 5.09 0.17
 -2 -8 2 4.75 0.18
 2 8 2 5.03 0.17
 -2 -8 -2 5.37 0.17
 -2 8 2 5.01 0.17
 2 8 -2 5.19 0.17
 2 -8 2 5.22 0.17
 -2 -8 -2 5 0.17
 2 -8 2 4.97 0.18
 -2 -8 3 13.35 0.42
 2 -8 -3 14.34 0.4
 -2 8 -3 13.36 0.4
 -2 -8 3 14.74 0.41
 2 -8 -3 13.62 0.39
 -2 -8 -3 13.24 0.39
 2 8 -3 13.38 0.39
 2 -8 3 14.15 0.41
 -2 -8 -3 14.48 0.4
 -2 8 3 14.06 0.39
 2 -8 3 13.76 0.42
 -2 -8 4 2.29 0.1
 2 -8 -4 2.34 0.09
 2 -8 -4 2.32 0.1
 -2 -8 4 2.25 0.11
 -2 8 -4 2.29 0.11
 -2 -8 -4 2.14 0.1
 2 -8 4 2.33 0.1
 2 8 -4 2.22 0.1
 2 -8 4 2.34 0.11
 2 -8 -5 1.26 0.08
 -2 8 -5 1.21 0.08
 -2 -8 5 1.43 0.09
 -2 -8 5 1.37 0.08
 -2 -8 -5 1.13 0.08
 2 -8 5 1.35 0.08
 2 -8 5 1.38 0.09
 2 8 -5 1.2 0.08
 -2 -8 6 1.07 0.08
 2 -8 -6 0.89 0.07
 -2 8 -6 0.82 0.07
 -2 -8 6 0.77 0.07
 -2 -8 -6 0.86 0.07
 2 -8 6 0.81 0.07
 2 -8 6 0.8 0.07
 2 8 -6 0.88 0.07
 -2 8 -7 3.64 0.16
 2 -8 -7 3.64 0.15
 -2 -8 7 3.74 0.16
 -2 -8 7 3.47 0.16
 2 8 -7 3.27 0.15
 2 -8 7 3.84 0.17
 2 -8 7 3.59 0.16
 -2 -8 -7 3.57 0.15
 2 -8 -8 0.07 0.05
 -2 8 -8 0.15 0.05
 -2 -8 8 0.14 0.05
 -2 -8 8 0.09 0.05
 2 -8 8 0.19 0.05
 -2 -8 -8 0.17 0.06
 2 -8 8 0.16 0.06
 2 8 -8 0.11 0.05
 2 9 0 17.97 0.51
 -2 9 0 18.19 0.51
 2 -9 0 18.4 0.54
 -2 -9 0 19.36 0.54
 -2 -9 1 0.6 0.05
 2 9 1 0.58 0.05
 2 -9 -1 0.44 0.04
 -2 9 -1 0.5 0.05
 -2 -9 -1 0.51 0.04
 -2 9 1 0.54 0.05
 2 -9 1 0.5 0.05
 2 -9 1 0.5 0.04
 2 9 -1 0.51 0.05
 -2 -9 2 3.98 0.16
 -2 9 -2 3.99 0.15
 2 9 2 4.25 0.15
 2 -9 -2 4.14 0.15
 2 -9 2 3.85 0.15
 -2 9 2 3.84 0.15
 -2 -9 -2 4.17 0.14
 2 9 -2 3.84 0.15
 2 -9 2 4.28 0.14
 -2 -9 3 0.28 0.05
 2 -9 -3 0.27 0.04
 2 9 3 0.25 0.04
 -2 9 -3 0.23 0.04
 2 -9 -3 0.25 0.04
 -2 -9 3 0.23 0.03
 2 -9 3 0.24 0.04
 -2 -9 -3 0.22 0.04
 2 9 -3 0.18 0.04
 -2 9 3 0.27 0.04
 2 -9 3 0.24 0.04
 -2 9 -4 2.55 0.12
 -2 -9 4 2.54 0.12
 2 -9 -4 2.66 0.12
 -2 -9 4 2.67 0.11
 2 -9 4 2.74 0.12
 2 -9 4 2.63 0.13
 -2 9 4 2.64 0.12
 -2 -9 -4 2.65 0.12
 2 9 -4 2.59 0.12
 -2 9 -5 0.82 0.07
 -2 -9 5 0.88 0.06
 2 -9 -5 0.74 0.06
 -2 -9 5 0.85 0.07
 2 -9 5 0.83 0.07
 -2 -9 -5 0.75 0.06
 2 -9 5 0.78 0.06
 2 9 -5 0.75 0.06
 -2 9 -6 1.34 0.09
 -2 -9 6 1.44 0.1
 -2 -9 6 1.29 0.09
 2 -9 -6 1.28 0.08
 2 -9 6 1.38 0.09
 -2 -9 -6 1.34 0.09
 2 -9 6 1.39 0.09
 2 9 -6 1.31 0.09
 -2 -9 7 0.16 0.05
 2 -9 -7 0.07 0.05
 -2 -9 7 0.11 0.05
 -2 9 -7 0.09 0.05
 2 9 -7 0.17 0.05
 2 -9 7 0.16 0.05
 2 -9 7 0.16 0.05
 -2 -9 -7 0.16 0.05
 -2 -9 8 0.68 0.08
 -2 -9 8 0.86 0.08
 -2 9 -8 0.75 0.08
 2 -9 -8 0.85 0.08
 2 -9 8 0.73 0.08
 2 9 -8 0.69 0.07
 -2 -9 -8 0.76 0.08
 2 -9 8 0.77 0.08
 -2 -10 0 1.16 0.07
 2 -10 0 1.13 0.07
 2 10 0 1.11 0.07
 -2 10 0 1.17 0.07
 2 10 1 9.55 0.29
 -2 10 -1 9.58 0.29
 2 -10 -1 9.33 0.3
 -2 -10 1 9.33 0.3
 2 10 -1 9.05 0.29
 -2 10 1 9.7 0.29
 2 -10 1 9.68 0.31
 -2 -10 -1 9.27 0.29
 2 10 2 1.38 0.08
 2 -10 -2 1.26 0.07
 -2 -10 2 1.33 0.08
 -2 10 -2 1.36 0.08
 2 10 -2 1.3 0.08
 -2 -10 -2 1.43 0.07
 2 -10 2 1.39 0.08
 -2 10 2 1.35 0.08
 -2 -10 3 5.54 0.21
 -2 10 -3 5.53 0.2
 2 -10 -3 5.48 0.19
 2 10 3 5.5 0.19
 2 -10 3 5.75 0.21
 -2 -10 -3 5.45 0.19
 2 10 -3 5.55 0.19
 -2 10 3 5.61 0.19
 2 -10 3 5.63 0.19
 2 10 4 2.48 0.11
 2 -10 -4 2.28 0.11
 -2 -10 4 2.46 0.12
 -2 10 -4 2.18 0.11
 2 10 -4 2.38 0.11
 2 -10 4 2.4 0.11
 -2 -10 -4 2.4 0.11
 2 -10 4 2.33 0.12
 -2 10 4 2.46 0.11
 -2 10 -5 1.68 0.1
 -2 -10 5 1.49 0.09
 2 -10 -5 1.61 0.09
 -2 -10 5 1.67 0.1
 2 -10 5 1.73 0.09
 -2 -10 -5 1.58 0.09
 2 -10 5 1.74 0.11
 -2 10 5 1.82 0.1
 2 10 -5 1.6 0.09
 2 -10 -6 1.58 0.1
 -2 10 -6 1.52 0.1
 -2 -10 6 1.64 0.11
 -2 -10 6 1.39 0.09
 -2 -10 -6 1.47 0.1
 2 -10 6 1.73 0.11
 2 -10 6 1.62 0.1
 2 10 -6 1.48 0.1
 -2 -10 7 1.83 0.12
 2 -10 -7 2.04 0.11
 -2 -10 7 2 0.11
 -2 10 -7 2.02 0.12
 2 -10 7 2.1 0.12
 -2 -10 -7 2.08 0.12
 2 10 -7 1.92 0.11
 2 -10 7 2.03 0.12
 2 11 0 0.01 0.01
 2 -11 0 0.01 0.01
 -2 11 0 0.02 0.01
 -2 -11 0 0.02 0.02
 2 -11 -1 6.79 0.23
 2 11 1 6.72 0.23
 -2 -11 1 6.58 0.23
 -2 11 -1 6.86 0.23
 -2 11 1 6.85 0.23
 -2 -11 -1 6.92 0.23
 2 -11 1 6.48 0.24
 2 11 -1 6.78 0.23
 -2 -11 2 2.44 0.12
 2 -11 -2 2.21 0.11
 2 11 2 2.35 0.11
 -2 11 -2 2.34 0.11
 -2 11 2 2.45 0.11
 2 -11 2 2.29 0.12
 2 11 -2 2.23 0.11
 -2 -11 3 11.69 0.37
 -2 11 -3 11.22 0.35
 2 11 3 10.92 0.34
 2 -11 3 11.29 0.37
 2 11 -3 11.36 0.35
 -2 11 3 11.14 0.35
 -2 11 -4 0.61 0.07
 -2 -11 4 0.7 0.07
 2 11 4 0.61 0.07
 -2 -11 -4 0.75 0.07
 2 11 -4 0.5 0.06
 2 -11 4 0.71 0.07
 -2 11 4 0.66 0.07
 2 -11 -5 1.86 0.11
 -2 -11 5 2.14 0.12
 -2 11 -5 1.93 0.11
 2 11 5 1.9 0.11
 -2 -11 -5 1.94 0.11
 2 11 -5 1.8 0.11
 2 -11 5 1.88 0.11
 -2 11 5 1.98 0.11
 2 -11 5 1.8 0.1
 2 -11 -6 1.14 0.09
 -2 -11 6 1.1 0.09
 -2 11 -6 1.13 0.09
 -2 11 6 1.17 0.09
 2 -11 6 1.09 0.08
 -2 -11 -6 1.1 0.09
 2 -11 6 1.07 0.09
 2 11 -6 1.07 0.08
 -2 -11 7 4.49 0.2
 -2 11 -7 4.74 0.2
 2 -11 -7 4.65 0.19
 2 -11 7 4.67 0.19
 -2 -11 -7 4.62 0.19
 2 11 -7 4.74 0.19
 2 -11 7 4.59 0.2
 -2 -12 0 4.12 0.16
 2 -12 0 4.13 0.17
 2 12 0 4.01 0.16
 -2 12 0 4.13 0.16
 -2 12 -1 1.02 0.08
 -2 -12 1 0.91 0.07
 2 12 1 0.86 0.07
 2 -12 -1 0.8 0.07
 -2 12 1 1.04 0.08
 -2 -12 -1 0.83 0.06
 2 12 -1 0.74 0.07
 2 -12 1 0.87 0.07
 2 -12 -2 1.43 0.09
 2 12 2 1.42 0.09
 -2 12 -2 1.62 0.1
 -2 -12 2 1.67 0.1
 2 12 -2 1.54 0.09
 -2 12 2 1.52 0.09
 2 -12 2 1.69 0.1
 -2 12 -3 4.13 0.17
 -2 -12 3 4.24 0.18
 2 12 3 4.3 0.17
 2 -12 3 4 0.18
 -2 12 3 4.29 0.17
 2 12 -3 3.98 0.17
 -2 12 -4 0.17 0.05
 2 12 4 0.07 0.04
 -2 -12 4 0.13 0.05
 2 12 -4 0.15 0.05
 -2 12 4 0.2 0.05
 2 -12 4 0.12 0.05
 -2 -12 5 3.02 0.15
 2 12 5 3.31 0.15
 -2 12 -5 2.77 0.14
 -2 12 5 2.96 0.14
 2 -12 5 2.93 0.15
 -2 -12 -5 2.8 0.14
 2 12 -5 2.97 0.14
 -2 12 -6 0.61 0.07
 2 12 6 0.54 0.07
 -2 -12 6 0.45 0.07
 2 -12 -6 0.52 0.07
 2 12 -6 0.5 0.07
 -2 -12 -6 0.54 0.07
 2 -12 6 0.49 0.07
 -2 12 6 0.41 0.07
 -2 13 0 1.93 0.11
 -2 -13 0 1.83 0.1
 2 -13 0 1.86 0.11
 2 13 0 1.93 0.11
 -2 13 -1 1.71 0.1
 2 -13 -1 1.68 0.1
 -2 -13 1 1.57 0.1
 2 13 1 1.57 0.1
 -2 13 1 1.54 0.1
 2 13 -1 1.49 0.1
 -2 -13 -1 1.5 0.09
 2 -13 1 1.52 0.1
 -2 -13 2 0.3 0.06
 2 13 2 0.37 0.06
 -2 13 -2 0.35 0.06
 -2 13 2 0.29 0.06
 2 13 -2 0.36 0.06
 2 -13 2 0.28 0.06
 2 13 3 0.35 0.06
 -2 -13 3 0.25 0.06
 -2 13 -3 0.28 0.06
 2 13 -3 0.27 0.06
 2 -13 3 0.19 0.06
 -2 13 3 0.21 0.06
 -2 13 -4 0.15 0.06
 2 13 4 0.16 0.06
 -2 -13 4 0.11 0.05
 -2 13 4 0.2 0.06
 2 13 -4 0.11 0.05
 2 -13 4 0.19 0.05
 2 13 5 1.18 0.09
 -2 13 -5 1.05 0.09
 -2 -13 5 1.01 0.09
 2 -13 5 1.17 0.1
 2 13 -5 1.12 0.09
 -2 13 5 1.21 0.09
 -2 -14 0 0.06 0.04
 2 14 0 0.12 0.05
 2 -14 0 0.18 0.05
 -2 14 0 0.15 0.05
 2 -14 -1 6.41 0.24
 2 14 1 6.67 0.24
 -2 -14 1 6.38 0.24
 -2 14 -1 6.3 0.24
 2 -14 1 6.54 0.24
 2 14 -1 6.5 0.24
 -2 14 1 6.45 0.24
 -2 14 -2 0.08 0.05
 2 14 2 0.07 0.05
 -2 -14 2 0.14 0.05
 -2 14 2 0.09 0.05
 2 14 -2 0.22 0.06
 2 -14 2 0.08 0.05
 -2 -14 3 0.87 0.09
 2 14 3 0.92 0.08
 -2 14 -3 1.06 0.09
 2 14 -3 0.97 0.08
 -2 14 3 0.96 0.09
 2 -14 3 0.86 0.08
 2 14 4 0.01 0.02
 -2 14 -4 0.03 0.02
 2 14 -4 0.12 0.05
 -2 14 4 0.03 0.02
 -2 15 0 0.18 0.06
 2 -15 0 0.13 0.05
 2 15 0 0.15 0.05
 -2 15 -1 1.08 0.09
 2 15 1 1.22 0.09
 -2 -15 1 1.1 0.09
 -2 15 1 1.3 0.1
 2 15 -1 1.37 0.1
 2 -15 1 1.08 0.09
 3 0 0 -0.13 0.01
 -3 0 1 -0.03 0.01
 3 0 -1 -0.03 0.01
 -3 0 -1 -0.03 0.01
 3 0 -1 0.01 0.01
 3 0 1 -0.03 0.01
 3 0 1 -0.01 0.01
 3 0 -1 -0.05 0
 3 0 2 -0.11 0.01
 -3 0 -2 -0.12 0.01
 3 0 2 -0.1 0.01
 3 0 -2 -0.11 0.01
 3 0 -2 -0.11 0.01
 3 0 3 0 0
 3 0 3 0.04 0.02
 -3 0 -3 -0.01 0.01
 -3 0 3 0 0.01
 3 0 -3 0 0.01
 -3 0 3 0.03 0.02
 -3 0 -4 0.06 0.02
 3 0 4 0.04 0.01
 3 0 -4 0.03 0.02
 -3 0 4 0.01 0.01
 3 0 4 0.03 0.02
 3 0 5 0.01 0.01
 3 0 -5 0 0.01
 -3 0 -5 0 0.01
 3 0 5 0 0.01
 -3 0 5 0.01 0.01
 -3 0 5 0 0.01
 -3 0 -6 -0.01 0.01
 -3 0 6 0.01 0.01
 -3 0 6 0 0.01
 3 0 -6 -0.01 0.01
 3 0 6 0 0.01
 -3 0 -7 0 0.01
 -3 0 7 0.01 0.01
 -3 0 7 0.01 0.01
 3 0 7 0 0.01
 3 0 -7 0 0.01
 -3 0 8 0.02 0.02
 -3 0 -8 -0.01 0.01
 3 0 8 -0.01 0.01
 3 0 -8 0 0.01
 -3 0 -9 0 0.02
 3 0 -9 0.08 0.05
 3 0 9 0 0.02
 -3 0 9 -0.02 0.01
 -3 0 -10 0.1 0.05
 -3 1 0 54.64 1.37
 3 1 0 57.57 1.48
 -3 -1 0 53.05 1.37
 3 -1 0 57.46 1.46
 3 -1 0 47.43 1.48
 -3 -1 0 56.72 1.47
 3 -1 -1 29.48 0.75
 3 1 1 29.94 0.81
 3 -1 -1 28.91 0.8
 -3 1 -1 29.85 0.75
 3 -1 -1 29.57 0.81
 -3 -1 1 30.82 0.8
 3 -1 1 29.34 0.81
 3 1 -1 29.59 0.75
 3 1 -1 29.67 0.81
 3 -1 1 31.36 0.8
 -3 -1 -1 28.94 0.79
 -3 -1 -1 29.68 0.75
 3 -1 -2 21.47 0.55
 3 -1 -2 20.6 0.58
 -3 -1 2 21.92 0.59
 3 1 2 20.84 0.57
 -3 -1 2 21.33 0.59
 3 -1 -2 22.17 0.6
 -3 1 -2 21.58 0.55
 3 1 2 21.35 0.59
 3 1 -2 20.7 0.55
 -3 1 2 21.73 0.58
 3 -1 2 21.71 0.58
 3 -1 2 22.5 0.6
 -3 -1 -2 21.54 0.55
 3 -1 -3 4.64 0.13
 -3 -1 3 4.47 0.15
 3 1 3 4.57 0.14
 3 -1 -3 4.64 0.15
 3 1 3 4.35 0.13
 -3 1 -3 4.68 0.14
 -3 -1 3 4.33 0.14
 -3 1 3 4.41 0.14
 3 -1 3 4.68 0.14
 -3 -1 -3 4.68 0.14
 3 1 -3 4.54 0.13
 -3 1 3 4.5 0.14
 3 1 4 16.28 0.46
 -3 1 -4 16.5 0.43
 3 -1 -4 15.91 0.42
 -3 -1 4 15.53 0.46
 -3 -1 4 15.95 0.45
 3 1 4 15.67 0.43
 3 1 -4 16.7 0.43
 3 -1 4 15.73 0.46
 -3 -1 -4 16.15 0.43
 -3 1 4 16.15 0.46
 -3 1 4 16.09 0.45
 3 -1 4 15.46 0.44
 3 1 5 39.88 1.08
 -3 -1 5 38.23 1.08
 3 -1 -5 39.13 1
 -3 1 -5 37.94 1
 3 1 5 39.19 1.04
 -3 -1 5 39.82 1.06
 -3 -1 -5 37.89 1
 3 -1 5 38.33 1.05
 3 -1 5 37.31 1.08
 -3 1 5 38.92 1.05
 -3 1 5 39.36 1.08
 3 1 -5 37.62 0.99
 -3 1 -6 16.25 0.46
 -3 -1 6 15.72 0.49
 3 -1 -6 16.67 0.45
 3 1 6 16.52 0.49
 -3 -1 6 16.7 0.48
 -3 1 6 17.1 0.49
 -3 -1 -6 15.86 0.46
 3 -1 6 16.62 0.49
 3 -1 6 16.54 0.46
 -3 1 6 16.58 0.47
 3 1 -6 16.95 0.45
 -3 -1 7 10.64 0.32
 -3 1 -7 10.2 0.32
 -3 -1 7 10.56 0.34
 3 -1 -7 10.11 0.31
 3 1 7 10.68 0.34
 -3 1 7 10.82 0.32
 -3 -1 -7 9.86 0.32
 3 -1 7 11.06 0.34
 3 1 -7 10.47 0.31
 -3 1 7 10.9 0.34
 3 -1 -8 2.04 0.1
 -3 1 -8 2.01 0.11
 3 1 8 2.03 0.11
 -3 -1 8 2.17 0.12
 3 -1 8 2.25 0.12
 3 1 -8 2.09 0.1
 -3 1 8 2.09 0.11
 -3 -1 -8 2.18 0.11
 3 1 9 2.99 0.15
 3 -1 -9 3.16 0.14
 -3 -1 9 3.22 0.15
 -3 1 -9 3.32 0.15
 3 -1 9 3.28 0.15
 -3 1 9 3.26 0.15
 3 1 -9 3.11 0.14
 -3 -1 -9 3.3 0.15
 3 1 10 0.5 0.07
 -3 1 -10 0.51 0.07
 -3 -1 10 0.58 0.08
 3 -1 10 0.42 0.07
 -3 -1 -10 0.63 0.07
 -3 1 10 0.52 0.08
 3 -2 0 89.08 2.34
 3 -2 0 80.12 2.29
 -3 -2 0 88.54 2.31
 3 2 0 84.44 2.33
 -3 2 0 86.33 2.19
 -3 -2 0 86.64 2.18
 3 -2 -1 55.39 1.52
 3 -2 -1 55.82 1.54
 -3 2 -1 57.1 1.43
 -3 -2 1 57.21 1.55
 3 -2 -1 59.19 1.44
 3 2 1 55.19 1.54
 -3 -2 1 59.08 1.52
 -3 -2 -1 57.71 1.43
 -3 -2 -1 56.78 1.53
 3 -2 1 57.39 1.55
 3 2 -1 56.44 1.44
 3 -2 1 56.28 1.52
 3 -2 -2 19.66 0.54
 -3 -2 2 19.48 0.54
 3 2 2 19.71 0.54
 -3 -2 2 20.15 0.54
 3 -2 -2 19.16 0.54
 3 -2 -2 19.16 0.5
 -3 2 -2 19.52 0.51
 -3 -2 -2 19.17 0.51
 3 -2 2 20.31 0.55
 3 2 -2 19.48 0.5
 3 -2 2 19.83 0.54
 3 -2 -3 32.67 0.86
 3 -2 -3 31.9 0.92
 -3 -2 3 34.25 0.93
 3 2 3 33.45 0.89
 3 2 3 34.07 0.92
 -3 -2 3 34.53 0.91
 -3 2 -3 32.56 0.86
 3 -2 -3 32.4 0.91
 -3 2 3 34.61 0.91
 3 2 -3 33.71 0.86
 3 -2 3 34.69 0.91
 -3 -2 -3 33.54 0.86
 3 -2 3 33.66 0.93
 3 2 4 1.09 0.04
 -3 -2 4 1.07 0.05
 3 -2 -4 1.02 0.05
 -3 -2 4 1 0.06
 3 2 4 1.07 0.05
 -3 2 4 1.08 0.05
 3 2 -4 1 0.05
 3 -2 4 1.13 0.06
 -3 2 4 1.08 0.05
 -3 -2 -4 1.07 0.05
 3 -2 4 1.03 0.05
 -3 -2 5 27.66 0.75
 3 2 5 27.18 0.76
 -3 2 -5 26.77 0.72
 3 -2 -5 27.42 0.71
 -3 -2 5 26.34 0.77
 -3 2 5 27.58 0.74
 -3 2 5 28.32 0.77
 3 -2 5 27.23 0.74
 -3 -2 -5 25.92 0.71
 3 -2 5 25.89 0.77
 3 2 -5 26.83 0.71
 -3 2 -6 6.87 0.22
 -3 -2 6 6.31 0.23
 3 -2 -6 7.04 0.21
 -3 -2 6 6.65 0.22
 3 2 6 6.85 0.22
 3 -2 6 6.32 0.23
 3 -2 6 6.77 0.21
 -3 2 6 7 0.21
 3 2 -6 6.86 0.21
 -3 2 6 6.74 0.23
 -3 -2 -6 6.35 0.21
 3 -2 -7 8.03 0.25
 -3 -2 7 8.03 0.26
 -3 -2 7 8.36 0.28
 3 2 7 8.36 0.27
 -3 2 -7 7.87 0.26
 -3 -2 -7 8.02 0.26
 3 -2 7 8.49 0.28
 -3 2 7 8.52 0.27
 3 2 -7 7.97 0.25
 -3 -2 8 3.24 0.14
 -3 2 -8 3.64 0.15
 -3 -2 8 3.66 0.16
 3 2 8 3.42 0.15
 3 -2 -8 3.37 0.14
 -3 2 8 3.6 0.15
 3 2 -8 3.51 0.14
 3 -2 8 3.56 0.16
 -3 -2 -8 3.68 0.15
 -3 2 -9 5.49 0.21
 3 2 9 5.71 0.22
 -3 -2 9 5.93 0.23
 3 -2 -9 5.39 0.2
 -3 2 9 5.63 0.22
 -3 -2 -9 5.99 0.22
 3 -2 9 6.24 0.23
 3 2 -9 5.21 0.2
 -3 2 -10 2.1 0.12
 3 2 10 2.38 0.13
 -3 -2 10 2.38 0.14
 3 -2 10 2.31 0.13
 -3 -2 -10 2.15 0.12
 -3 2 10 2.46 0.13
 -3 3 0 13.24 0.35
 3 3 0 13.68 0.35
 -3 -3 0 13.32 0.35
 -3 -3 0 13.51 0.37
 -3 -3 0 13.21 0.36
 3 -3 0 13.51 0.37
 3 -3 -1 12.77 0.34
 3 -3 -1 12.22 0.34
 -3 3 -1 12.17 0.32
 3 -3 -1 11.83 0.32
 -3 -3 1 12.36 0.34
 -3 -3 1 12.16 0.34
 3 -3 1 12.37 0.35
 -3 -3 -1 12.17 0.32
 3 3 -1 12.37 0.32
 -3 -3 -1 12.08 0.33
 3 -3 1 11.92 0.34
 -3 -3 2 23.85 0.65
 3 -3 -2 22.75 0.61
 3 3 2 23.43 0.65
 -3 -3 2 23.32 0.66
 3 -3 -2 23.76 0.66
 3 -3 -2 23.62 0.65
 -3 -3 -2 23.84 0.64
 3 3 -2 23.7 0.61
 3 -3 2 24.6 0.66
 3 -3 2 24.82 0.65
 -3 -3 -2 23.99 0.61
 -3 -3 3 31.5 0.85
 3 -3 -3 30.94 0.84
 3 -3 -3 30.93 0.79
 3 -3 -3 30.87 0.86
 3 3 3 31.41 0.85
 -3 3 -3 29.89 0.8
 -3 -3 3 29.78 0.86
 3 3 3 30.85 0.82
 3 -3 3 31.81 0.86
 -3 -3 -3 30.49 0.82
 3 3 -3 30.76 0.79
 -3 -3 -3 31 0.8
 3 -3 3 31.95 0.84
 3 -3 -4 3.91 0.13
 3 -3 -4 4.06 0.14
 -3 -3 4 3.85 0.14
 3 -3 -4 3.9 0.13
 -3 -3 4 3.75 0.13
 -3 3 -4 3.85 0.13
 3 3 4 3.76 0.13
 -3 3 4 4.06 0.13
 3 -3 4 3.74 0.14
 -3 3 4 3.79 0.13
 3 3 -4 4.07 0.13
 -3 -3 -4 3.86 0.13
 3 -3 4 3.75 0.13
 3 -3 -5 1.86 0.08
 -3 3 -5 2.03 0.09
 -3 -3 5 2.06 0.09
 3 3 5 1.91 0.08
 -3 -3 5 1.99 0.09
 3 -3 5 1.93 0.09
 -3 -3 -5 1.74 0.08
 3 3 -5 1.86 0.08
 3 -3 5 2.06 0.08
 -3 3 5 2.07 0.08
 -3 3 5 2.09 0.09
 -3 -3 6 6.05 0.21
 -3 3 -6 6.36 0.21
 -3 -3 6 6.06 0.22
 3 -3 -6 6.38 0.2
 3 3 6 6.33 0.21
 -3 -3 -6 6.25 0.21
 3 3 -6 6.1 0.2
 3 -3 6 6.35 0.22
 3 -3 6 6.25 0.2
 -3 3 6 6.54 0.2
 -3 3 6 6.1 0.21
 3 -3 -7 4.43 0.16
 -3 3 -7 4.35 0.16
 -3 -3 7 4.32 0.17
 -3 -3 7 4.49 0.16
 3 3 7 4.34 0.16
 -3 3 7 4.34 0.17
 -3 -3 -7 4.42 0.17
 3 -3 7 4.45 0.16
 3 3 -7 4.43 0.16
 3 -3 7 4.53 0.18
 3 -3 -8 3.54 0.14
 -3 -3 8 3.44 0.16
 3 3 8 3.28 0.14
 -3 -3 8 3.27 0.14
 -3 3 -8 3.4 0.15
 -3 -3 -8 3.26 0.14
 -3 3 8 3.37 0.15
 3 -3 8 3.47 0.16
 3 3 -8 3.09 0.13
 -3 -3 9 6.19 0.24
 3 3 9 6.04 0.23
 -3 3 -9 6.53 0.23
 3 -3 -9 6.17 0.22
 3 3 -9 5.98 0.22
 3 -3 9 6.47 0.25
 -3 -3 -9 6.42 0.23
 -3 3 9 6.16 0.23
 -3 4 0 0.03 0.01
 3 -4 0 0.03 0.01
 -3 -4 0 0.03 0.01
 3 4 0 0.01 0
 -3 -4 0 0.03 0.01
 3 -4 0 0.04 0.02
 3 -4 -1 22.49 0.62
 -3 -4 1 22.68 0.62
 -3 -4 1 21.33 0.62
 3 -4 -1 23.01 0.58
 3 -4 -1 21.99 0.62
 -3 4 -1 22.16 0.58
 3 -4 1 22.29 0.62
 3 4 -1 22.15 0.58
 -3 4 1 22.56 0.58
 3 -4 1 23.69 0.62
 -3 -4 -1 22.77 0.58
 -3 -4 -1 22.76 0.61
 3 -4 -2 4.68 0.14
 -3 -4 2 4.8 0.15
 3 -4 -2 4.69 0.15
 -3 -4 2 4.62 0.15
 -3 4 -2 4.7 0.14
 3 4 2 4.67 0.13
 3 -4 -2 4.68 0.15
 3 -4 2 4.74 0.15
 -3 -4 -2 4.76 0.14
 3 4 -2 4.72 0.14
 3 -4 2 4.85 0.15
 -3 -4 -2 4.79 0.14
 3 -4 -3 28.58 0.82
 3 -4 -3 29.05 0.81
 -3 -4 3 29.91 0.83
 3 4 3 29.91 0.81
 -3 -4 3 29.9 0.82
 3 -4 -3 29.61 0.77
 -3 4 -3 29.83 0.77
 3 4 -3 30.13 0.77
 -3 -4 -3 30.21 0.77
 3 -4 3 29.91 0.82
 -3 -4 -3 30.57 0.8
 -3 -4 4 4.01 0.14
 3 -4 -4 4.21 0.14
 3 -4 -4 4.05 0.13
 -3 4 -4 3.99 0.14
 -3 -4 4 4.05 0.14
 3 4 4 4.03 0.13
 3 -4 -4 4.22 0.13
 -3 4 4 4.13 0.14
 3 -4 4 3.91 0.14
 3 4 -4 4.04 0.13
 3 -4 4 4.02 0.15
 -3 -4 -4 4.05 0.14
 -3 4 4 3.88 0.13
 -3 4 -5 5.91 0.19
 3 -4 -5 5.82 0.18
 3 -4 -5 6.21 0.19
 -3 -4 5 5.77 0.2
 -3 -4 5 5.76 0.2
 3 4 5 5.86 0.19
 3 -4 5 5.81 0.2
 -3 4 5 5.98 0.19
 3 4 -5 5.83 0.18
 3 -4 5 5.77 0.19
 -3 -4 -5 5.49 0.19
 -3 4 5 5.89 0.18
 -3 -4 6 0.26 0.04
 -3 4 -6 0.29 0.04
 -3 -4 6 0.34 0.04
 3 -4 -6 0.38 0.04
 3 4 6 0.31 0.04
 3 -4 6 0.3 0.04
 -3 4 6 0.3 0.04
 -3 -4 -6 0.34 0.05
 3 4 -6 0.31 0.04
 3 -4 6 0.32 0.05
 3 -4 -7 2.25 0.1
 -3 4 -7 2.22 0.11
 -3 -4 7 2.09 0.1
 -3 -4 7 2.35 0.12
 3 4 7 2.23 0.1
 3 4 -7 2.24 0.1
 3 -4 7 2.17 0.11
 -3 -4 -7 2.42 0.11
 -3 4 7 2.18 0.1
 3 -4 7 2.19 0.1
 -3 4 -8 1.48 0.09
 -3 -4 8 1.4 0.09
 -3 -4 8 1.52 0.1
 3 -4 -8 1.45 0.09
 3 4 -8 1.43 0.09
 -3 -4 -8 1.42 0.09
 -3 4 8 1.4 0.09
 3 -4 8 1.45 0.1
 -3 4 -9 0.27 0.06
 3 -4 -9 0.22 0.06
 -3 -4 9 0.15 0.05
 3 4 -9 0.24 0.05
 3 -4 9 0.23 0.06
 -3 4 9 0.29 0.06
 -3 -4 -9 0.29 0.06
 3 5 0 3.87 0.12
 -3 -5 0 3.75 0.12
 3 -5 0 4.09 0.12
 -3 5 0 3.72 0.12
 -3 -5 0 3.81 0.11
 3 -5 0 3.8 0.13
 -3 5 -1 6.48 0.19
 -3 -5 1 6.61 0.2
 3 -5 -1 6.37 0.2
 -3 -5 1 6.69 0.19
 3 -5 -1 6.58 0.19
 3 -5 1 6.59 0.2
 -3 5 1 6.57 0.19
 -3 -5 -1 6.64 0.19
 3 5 -1 6.75 0.19
 3 -5 1 6.99 0.21
 -3 -5 -1 6.76 0.19
 3 -5 -2 1 0.05
 3 -5 -2 0.92 0.05
 -3 -5 2 1.07 0.05
 -3 5 -2 0.95 0.05
 -3 -5 2 1.02 0.05
 3 -5 -2 1 0.04
 3 5 -2 0.89 0.05
 -3 -5 -2 1 0.04
 3 -5 2 0.97 0.05
 -3 -5 -2 1.03 0.05
 3 -5 2 1.02 0.05
 3 5 3 9.36 0.26
 -3 -5 3 9.24 0.28
 -3 5 -3 8.86 0.26
 -3 -5 3 9.01 0.27
 3 -5 -3 9.37 0.27
 3 -5 -3 9.19 0.27
 3 -5 -3 8.64 0.26
 -3 -5 -3 9.37 0.25
 -3 -5 -3 9.06 0.26
 3 -5 3 9.21 0.28
 3 5 -3 9.26 0.26
 3 -5 3 8.89 0.28
 -3 5 -4 1.39 0.07
 3 -5 -4 1.39 0.06
 3 5 4 1.67 0.06
 -3 -5 4 1.54 0.08
 3 -5 -4 1.44 0.07
 -3 -5 4 1.57 0.07
 3 -5 -4 1.42 0.07
 3 -5 4 1.58 0.07
 -3 -5 -4 1.47 0.07
 3 5 -4 1.48 0.07
 -3 5 4 1.48 0.07
 3 -5 4 1.57 0.08
 -3 -5 5 6.94 0.23
 3 -5 -5 6.78 0.22
 3 -5 -5 7.27 0.22
 3 5 5 7.35 0.22
 -3 -5 5 7.11 0.23
 -3 5 -5 6.8 0.22
 3 5 -5 7 0.22
 -3 5 5 7.3 0.22
 3 -5 5 7.14 0.23
 -3 5 5 7.32 0.22
 3 -5 5 6.9 0.24
 -3 -5 -5 6.51 0.22
 -3 5 -6 1.83 0.09
 3 5 6 1.74 0.08
 -3 -5 6 1.67 0.09
 3 -5 -6 1.94 0.09
 -3 -5 6 1.84 0.09
 -3 -5 -6 1.86 0.09
 3 5 -6 2.02 0.09
 -3 5 6 1.77 0.09
 3 -5 6 1.68 0.1
 3 -5 6 1.63 0.09
 3 -5 -7 2.24 0.1
 -3 -5 7 2.11 0.11
 -3 5 -7 2.27 0.11
 -3 -5 7 2.07 0.11
 -3 -5 -7 2.41 0.11
 3 -5 7 1.91 0.1
 -3 5 7 2 0.1
 3 5 -7 2.21 0.1
 3 -5 7 2.03 0.11
 -3 -5 8 1.76 0.1
 -3 5 -8 1.59 0.1
 3 -5 -8 1.71 0.1
 -3 -5 8 1.7 0.11
 -3 -5 -8 1.82 0.1
 3 -5 8 1.93 0.11
 3 5 -8 1.69 0.1
 -3 5 8 1.75 0.1
 -3 -5 9 4.96 0.21
 3 -5 -9 4.62 0.18
 -3 5 -9 4.96 0.2
 -3 -5 -9 5.08 0.2
 3 -5 9 4.94 0.21
 3 5 -9 4.46 0.19
 3 -6 0 0.02 0.01
 -3 -6 0 0.1 0.02
 3 -6 0 0.01 0.01
 3 6 0 0.01 0.01
 -3 -6 0 0.04 0.01
 -3 6 0 0.08 0.02
 -3 6 -1 19.23 0.51
 3 -6 -1 19.14 0.54
 -3 -6 1 19.24 0.54
 3 -6 -1 19.31 0.54
 -3 -6 1 20.2 0.54
 -3 6 1 19.35 0.51
 3 6 -1 18.64 0.51
 -3 -6 -1 19.25 0.51
 -3 -6 -1 19.29 0.54
 3 -6 1 19.47 0.54
 3 -6 -2 2.11 0.08
 3 -6 -2 2.17 0.08
 -3 -6 2 2.12 0.09
 -3 -6 2 2.06 0.08
 -3 6 -2 2.23 0.09
 3 -6 -2 2.22 0.08
 3 -6 2 1.99 0.09
 -3 -6 -2 2.18 0.08
 3 -6 2 2.12 0.08
 3 6 -2 2.14 0.08
 -3 6 2 2.03 0.08
 -3 6 -3 8.84 0.27
 3 -6 -3 9.44 0.27
 3 -6 -3 9.01 0.27
 -3 -6 3 9.61 0.29
 -3 -6 3 9.82 0.28
 3 -6 -3 8.82 0.27
 -3 -6 -3 8.93 0.27
 3 -6 3 9.5 0.29
 -3 -6 -3 9.34 0.26
 3 -6 3 9.67 0.29
 3 6 -3 8.89 0.26
 3 -6 -4 12.58 0.35
 3 -6 -4 12.66 0.36
 -3 -6 4 11.68 0.37
 3 -6 -4 12.32 0.34
 -3 6 -4 12.32 0.35
 -3 -6 4 12.04 0.37
 3 -6 4 11.7 0.37
 3 6 -4 12.19 0.34
 -3 -6 -4 12.28 0.35
 3 -6 4 11.93 0.37
 -3 6 -5 7.64 0.25
 -3 -6 5 7.71 0.26
 3 -6 -5 8.57 0.25
 -3 -6 5 7.79 0.26
 3 -6 -5 7.55 0.24
 -3 -6 -5 7.69 0.24
 -3 6 5 8.04 0.24
 3 -6 5 7.51 0.26
 -3 6 5 7.89 0.24
 3 -6 5 7.75 0.25
 3 6 -5 7.62 0.24
 3 -6 -6 15.76 0.45
 -3 -6 6 16.13 0.49
 -3 6 -6 15.57 0.46
 -3 -6 6 16.87 0.49
 3 -6 6 15.94 0.49
 3 6 -6 15.63 0.45
 -3 -6 -6 16.22 0.46
 3 -6 6 15.84 0.48
 -3 6 6 15.94 0.47
 -3 6 -7 7.81 0.27
 -3 -6 7 8.18 0.28
 3 -6 -7 8.61 0.26
 -3 -6 7 8.17 0.28
 3 -6 7 8.45 0.29
 3 6 -7 7.66 0.26
 -3 -6 -7 8.22 0.27
 3 -6 7 7.83 0.27
 3 -6 -8 4.06 0.16
 -3 -6 8 4.21 0.18
 -3 -6 8 4.3 0.17
 -3 6 -8 3.97 0.17
 3 -6 8 3.97 0.16
 -3 -6 -8 3.86 0.17
 3 6 -8 3.78 0.16
 3 -6 8 4.45 0.19
 3 -6 -9 2.9 0.14
 -3 -6 9 2.91 0.15
 -3 -6 9 2.92 0.14
 -3 6 -9 2.9 0.14
 -3 -6 -9 2.79 0.14
 3 -6 9 2.72 0.15
 3 -7 0 2.05 0.07
 3 7 0 2.14 0.08
 3 -7 0 2.01 0.09
 -3 -7 0 2.1 0.08
 -3 -7 0 2.01 0.06
 -3 7 0 1.99 0.08
 3 -7 -1 9.24 0.26
 -3 -7 1 8.62 0.27
 -3 -7 1 9.18 0.26
 3 -7 -1 9 0.27
 -3 7 -1 8.54 0.26
 3 7 1 8.93 0.26
 3 -7 1 8.75 0.28
 -3 -7 -1 9.1 0.27
 -3 7 1 9.06 0.26
 3 -7 1 9.5 0.27
 3 7 -1 8.78 0.26
 -3 7 -2 1.94 0.09
 3 -7 -2 2.03 0.07
 3 -7 -2 1.96 0.08
 3 -7 -2 1.93 0.08
 -3 -7 2 1.86 0.09
 -3 -7 2 2.07 0.08
 3 -7 2 2.07 0.09
 -3 -7 -2 1.97 0.08
 3 -7 2 2.2 0.08
 3 7 -2 1.91 0.08
 -3 -7 -2 2.04 0.08
 -3 7 2 2.02 0.08
 -3 -7 3 3.31 0.12
 3 -7 -3 2.99 0.12
 -3 -7 3 3.33 0.13
 -3 7 -3 3.05 0.12
 3 -7 -3 3.29 0.11
 3 -7 -3 3.28 0.12
 -3 -7 -3 3.2 0.11
 -3 -7 -3 3.13 0.12
 3 7 -3 3.1 0.12
 3 -7 3 3.25 0.13
 3 -7 3 3.25 0.12
 3 -7 -4 0.62 0.04
 -3 7 -4 0.65 0.05
 3 -7 -4 0.53 0.05
 -3 -7 4 0.56 0.05
 -3 -7 4 0.59 0.05
 3 -7 -4 0.57 0.04
 3 -7 4 0.52 0.05
 -3 -7 -4 0.6 0.05
 3 7 -4 0.64 0.05
 3 -7 4 0.6 0.05
 -3 -7 5 2.37 0.11
 -3 7 -5 2.2 0.11
 3 -7 -5 2.38 0.1
 -3 -7 5 2.33 0.11
 -3 -7 -5 2.47 0.11
 3 7 -5 2.63 0.11
 3 -7 5 2.26 0.11
 3 -7 5 2.21 0.11
 -3 -7 6 3.45 0.15
 -3 7 -6 3.2 0.14
 -3 -7 6 3.26 0.14
 3 -7 -6 3.28 0.13
 3 7 -6 3.36 0.13
 -3 -7 -6 3.38 0.14
 3 -7 6 3.31 0.14
 3 -7 6 3.38 0.15
 -3 -7 7 4.63 0.18
 -3 -7 7 4.54 0.19
 3 -7 -7 4.58 0.17
 -3 7 -7 4.88 0.18
 3 7 -7 4.02 0.17
 3 -7 7 4.77 0.19
 -3 -7 -7 4.51 0.18
 3 -7 7 4.5 0.18
 -3 -7 8 0.2 0.06
 3 -7 -8 0.17 0.05
 -3 7 -8 0.25 0.06
 -3 -7 8 0.31 0.06
 3 7 -8 0.22 0.05
 -3 -7 -8 0.33 0.06
 3 -7 8 0.16 0.06
 3 -7 8 0.25 0.05
 -3 -7 9 1.61 0.11
 3 -7 -9 1.67 0.1
 -3 -7 9 1.67 0.11
 -3 7 -9 1.92 0.11
 3 -7 9 1.55 0.11
 -3 -7 -9 1.75 0.11
 -3 8 0 1.6 0.08
 3 8 0 1.68 0.08
 3 -8 0 1.69 0.08
 -3 -8 0 1.76 0.08
 3 -8 0 1.8 0.07
 -3 -8 1 30.61 0.84
 3 8 1 30.3 0.79
 -3 8 -1 29.81 0.8
 3 -8 -1 30 0.84
 3 -8 -1 31.08 0.83
 3 -8 1 29.35 0.84
 -3 8 1 29.57 0.79
 -3 -8 -1 30.3 0.83
 3 8 -1 28.51 0.79
 3 -8 1 31.37 0.84
 -3 8 -2 2.16 0.09
 3 -8 -2 2.22 0.09
 -3 -8 2 2.03 0.08
 -3 -8 2 2.08 0.1
 -3 -8 -2 2.15 0.08
 -3 -8 -2 2.08 0.09
 3 8 -2 1.93 0.09
 3 -8 2 1.86 0.09
 -3 8 2 2.05 0.09
 3 -8 2 1.96 0.08
 3 -8 -3 2.34 0.1
 -3 -8 3 2.13 0.09
 3 -8 -3 2.21 0.1
 -3 -8 3 2.01 0.1
 -3 8 -3 2.23 0.1
 3 8 -3 2.23 0.1
 3 -8 3 2.19 0.11
 -3 -8 -3 2.26 0.1
 -3 8 3 2.24 0.1
 3 -8 3 2.33 0.1
 -3 -8 4 3.37 0.15
 -3 -8 4 3.65 0.14
 3 -8 -4 3.72 0.14
 3 -8 -4 3.73 0.13
 -3 8 -4 3.52 0.14
 3 -8 4 3.71 0.15
 -3 -8 -4 3.5 0.14
 3 -8 4 3.76 0.14
 3 8 -4 3.53 0.14
 -3 -8 5 0.53 0.06
 -3 -8 5 0.62 0.06
 -3 8 -5 0.66 0.06
 3 -8 -5 0.59 0.06
 -3 -8 -5 0.69 0.06
 3 -8 5 0.58 0.06
 3 -8 5 0.58 0.06
 3 8 -5 0.68 0.06
 3 -8 -6 0.31 0.05
 -3 -8 6 0.31 0.05
 -3 8 -6 0.37 0.05
 -3 -8 6 0.31 0.06
 3 -8 6 0.29 0.05
 3 -8 6 0.39 0.06
 3 8 -6 0.35 0.05
 -3 -8 -6 0.4 0.05
 -3 8 -7 1.87 0.11
 -3 -8 7 2.06 0.12
 3 -8 -7 1.75 0.1
 -3 -8 7 2.09 0.12
 3 -8 7 2.08 0.12
 3 -8 7 2.07 0.11
 -3 -8 -7 1.91 0.11
 3 8 -7 1.89 0.1
 3 -8 -8 0.68 0.07
 -3 8 -8 0.69 0.08
 -3 -8 8 0.6 0.08
 -3 -8 8 0.83 0.08
 -3 -8 -8 0.67 0.08
 3 8 -8 0.72 0.07
 3 -8 8 0.71 0.08
 3 -8 8 0.67 0.07
 3 -9 0 9.15 0.3
 3 9 0 9.13 0.28
 -3 -9 0 9.97 0.3
 -3 9 0 9.4 0.28
 3 -9 0 9.55 0.28
 3 9 1 15.53 0.44
 -3 -9 1 15.49 0.46
 -3 9 -1 14.86 0.44
 3 -9 -1 15.41 0.46
 3 -9 1 15.38 0.46
 3 9 -1 15.17 0.43
 3 -9 1 16.25 0.45
 -3 -9 -1 15.86 0.45
 -3 9 1 15.35 0.44
 -3 -9 2 21.25 0.63
 -3 9 -2 21.13 0.6
 3 9 2 21.4 0.59
 3 -9 -2 22.36 0.62
 -3 -9 -2 22.69 0.61
 -3 9 2 21.78 0.59
 3 9 -2 22.07 0.59
 -3 -9 -2 21.77 0.59
 3 -9 2 22.26 0.62
 3 -9 2 21.17 0.63
 -3 -9 3 4.31 0.17
 -3 -9 3 4.78 0.16
 -3 9 -3 4.09 0.16
 3 -9 -3 4.39 0.16
 3 -9 3 4.69 0.17
 -3 9 3 4.55 0.16
 -3 -9 -3 4.39 0.16
 3 -9 3 4.53 0.16
 3 9 -3 4.29 0.16
 3 -9 -4 14.98 0.43
 -3 9 -4 14.88 0.44
 -3 -9 4 15.45 0.45
 -3 -9 4 15.61 0.47
 3 -9 4 14.94 0.46
 3 -9 4 15.93 0.47
 -3 9 4 15.33 0.43
 3 9 -4 14.53 0.43
 -3 -9 -4 15.23 0.44
 3 -9 -5 4.65 0.17
 -3 9 -5 5.04 0.18
 -3 -9 5 4.67 0.19
 -3 -9 5 4.36 0.17
 3 9 -5 4.87 0.17
 3 -9 5 4.53 0.18
 -3 -9 -5 4.74 0.18
 3 -9 5 4.67 0.18
 -3 -9 6 0.54 0.07
 3 -9 -6 0.53 0.06
 -3 -9 6 0.6 0.06
 -3 9 -6 0.51 0.06
 3 -9 6 0.54 0.06
 3 -9 6 0.62 0.07
 -3 -9 -6 0.57 0.06
 3 9 -6 0.53 0.06
 -3 -9 7 6.38 0.24
 -3 -9 7 6.29 0.24
 -3 9 -7 6.16 0.23
 3 -9 -7 6.21 0.22
 -3 -9 -7 6.25 0.23
 3 9 -7 5.93 0.22
 3 -9 7 6.66 0.24
 3 -9 7 6.53 0.24
 -3 9 -8 0.38 0.07
 -3 -9 8 0.28 0.06
 3 -9 -8 0.3 0.06
 -3 -9 8 0.31 0.06
 3 -9 8 0.34 0.06
 3 9 -8 0.38 0.06
 -3 -9 -8 0.34 0.06
 3 -9 8 0.36 0.06
 -3 10 0 6.9 0.22
 3 10 0 6.64 0.22
 -3 -10 0 6.82 0.23
 3 -10 0 6.43 0.23
 3 10 1 1.93 0.09
 -3 -10 1 2.02 0.1
 3 -10 -1 1.8 0.09
 -3 10 -1 1.75 0.09
 3 10 -1 1.79 0.09
 -3 10 1 1.97 0.09
 3 -10 1 1.89 0.1
 -3 -10 -1 1.85 0.09
 -3 10 -2 7.03 0.24
 3 -10 -2 7.08 0.24
 3 10 2 7.24 0.24
 -3 -10 2 7.11 0.25
 3 -10 2 7.4 0.23
 -3 -10 -2 7.11 0.23
 3 10 -2 7.06 0.23
 3 -10 2 7.59 0.25
 -3 10 2 7.38 0.24
 -3 10 -3 0.54 0.06
 3 10 3 0.53 0.06
 3 -10 -3 0.6 0.05
 -3 -10 3 0.57 0.06
 3 10 -3 0.63 0.06
 -3 -10 -3 0.58 0.06
 -3 10 3 0.56 0.06
 3 -10 3 0.61 0.05
 3 -10 3 0.61 0.06
 3 -10 -4 0.57 0.06
 -3 -10 4 0.56 0.06
 -3 10 -4 0.6 0.06
 3 -10 4 0.56 0.05
 -3 10 4 0.53 0.06
 -3 -10 -4 0.58 0.06
 3 10 -4 0.62 0.06
 3 -10 4 0.56 0.06
 -3 -10 5 3.28 0.15
 -3 -10 5 3.96 0.17
 3 -10 -5 3.59 0.15
 -3 10 -5 3.48 0.15
 3 10 -5 3.7 0.15
 -3 10 5 3.81 0.15
 3 -10 5 3.53 0.15
 -3 -10 -5 3.71 0.15
 3 -10 5 3.77 0.16
 3 -10 -6 1.2 0.08
 -3 -10 6 1.18 0.09
 -3 -10 6 1.01 0.08
 -3 10 -6 1.15 0.08
 3 -10 6 1.08 0.09
 -3 -10 -6 1.06 0.09
 3 -10 6 1.2 0.09
 3 10 -6 1.05 0.08
 3 -10 -7 0.69 0.07
 -3 -10 7 0.82 0.08
 -3 10 -7 0.74 0.08
 -3 -10 7 0.67 0.08
 -3 -10 -7 0.72 0.08
 3 10 -7 0.58 0.07
 3 -10 7 0.82 0.08
 3 -10 7 0.86 0.08
 3 -11 0 6.42 0.23
 -3 11 0 6.49 0.22
 -3 -11 0 6.2 0.22
 3 11 0 6.24 0.21
 3 11 1 3.74 0.15
 -3 -11 1 3.91 0.16
 3 -11 -1 3.76 0.15
 -3 11 -1 3.69 0.15
 -3 -11 -1 3.79 0.15
 3 11 -1 3.98 0.15
 -3 11 1 3.88 0.15
 3 -11 1 3.89 0.16
 3 -11 -2 2.48 0.11
 -3 -11 2 2.53 0.12
 3 11 2 2.48 0.12
 -3 11 -2 2.82 0.13
 -3 11 2 2.63 0.12
 3 -11 2 2.5 0.12
 3 11 -2 2.52 0.12
 -3 -11 3 1.61 0.1
 -3 11 -3 1.57 0.1
 3 -11 -3 1.5 0.08
 3 11 3 1.78 0.1
 3 -11 3 1.54 0.1
 -3 11 3 1.61 0.09
 3 11 -3 1.57 0.09
 -3 -11 4 0.51 0.07
 -3 11 -4 0.44 0.06
 3 11 4 0.59 0.07
 -3 -11 -4 0.49 0.06
 3 -11 4 0.63 0.07
 3 11 -4 0.59 0.06
 -3 11 4 0.65 0.07
 3 -11 -5 0.81 0.07
 -3 -11 5 0.81 0.07
 -3 11 -5 0.72 0.07
 3 11 -5 0.74 0.07
 3 -11 5 0.65 0.07
 -3 11 5 0.66 0.07
 -3 -11 -5 0.79 0.07
 3 -11 5 0.66 0.06
 3 -11 -6 1.76 0.1
 -3 -11 6 1.71 0.11
 -3 11 -6 1.65 0.11
 -3 -11 -6 1.52 0.1
 3 -11 6 1.64 0.1
 -3 11 6 1.82 0.11
 3 -11 6 1.77 0.11
 3 11 -6 1.64 0.1
 3 -11 -7 2.3 0.12
 -3 11 -7 2.43 0.13
 -3 -11 7 2.09 0.13
 3 -11 7 2.23 0.13
 -3 11 7 2.32 0.12
 -3 -11 -7 2.27 0.13
 3 -11 7 2.27 0.13
 3 -12 0 1.7 0.1
 -3 12 0 1.72 0.1
 3 12 0 1.85 0.1
 -3 -12 0 1.64 0.09
 -3 12 -1 5.87 0.21
 3 -12 -1 5.71 0.21
 3 12 1 5.81 0.21
 -3 -12 1 5.81 0.21
 3 -12 1 6.16 0.22
 3 12 -1 5.87 0.21
 -3 12 1 5.97 0.21
 -3 -12 -1 5.53 0.2
 -3 12 -2 1.42 0.09
 3 -12 -2 1.34 0.08
 -3 -12 2 1.32 0.09
 3 12 2 1.35 0.09
 -3 12 2 1.44 0.09
 3 -12 2 1.29 0.09
 3 12 -2 1.46 0.09
 -3 -12 3 6.06 0.23
 3 12 3 5.94 0.22
 -3 12 -3 6.16 0.22
 3 -12 3 6.26 0.23
 3 12 -3 5.86 0.22
 -3 12 3 6.03 0.22
 3 12 4 0.25 0.06
 -3 -12 4 0.18 0.06
 -3 12 -4 0.26 0.06
 3 12 -4 0.27 0.06
 -3 12 4 0.4 0.06
 3 -12 4 0.22 0.06
 -3 -12 5 1.71 0.11
 3 12 5 1.54 0.1
 -3 12 -5 1.38 0.1
 -3 12 5 1.71 0.1
 3 -12 5 1.59 0.11
 -3 -12 -5 1.42 0.1
 3 12 -5 1.53 0.1
 3 12 6 0.13 0.05
 -3 12 -6 0.13 0.06
 -3 -12 6 0.08 0.06
 3 12 -6 0.15 0.06
 -3 -12 -6 0.22 0.06
 3 -12 6 0.1 0.06
 -3 12 6 0.05 0.02
 -3 -13 0 8.52 0.3
 3 -13 0 8.96 0.31
 3 13 0 9.28 0.3
 -3 13 0 9.23 0.3
 -3 13 -1 3.01 0.14
 3 13 1 2.93 0.14
 3 -13 -1 3.1 0.14
 -3 -13 1 2.97 0.14
 -3 13 1 3.09 0.14
 3 13 -1 2.9 0.14
 3 -13 1 2.97 0.14
 3 13 2 5.14 0.2
 3 -13 -2 4.54 0.19
 -3 13 -2 4.81 0.19
 -3 -13 2 5.21 0.2
 3 13 -2 4.78 0.19
 -3 13 2 5.37 0.2
 3 -13 2 5.11 0.2
 -3 -13 3 9.14 0.32
 -3 13 -3 9.51 0.31
 3 13 3 8.77 0.3
 3 -13 3 8.9 0.32
 -3 13 3 9.2 0.3
 3 13 -3 9.53 0.31
 3 13 4 1.67 0.11
 -3 -13 4 1.54 0.11
 -3 13 -4 1.54 0.11
 -3 13 4 1.53 0.1
 3 13 -4 1.63 0.1
 3 -13 4 1.31 0.1
 3 13 5 1.18 0.09
 -3 13 -5 1.15 0.09
 -3 -13 5 1.17 0.1
 -3 13 5 1.19 0.09
 3 13 -5 1.18 0.09
 3 -13 5 0.91 0.09
 -3 -14 0 2.24 0.12
 -3 14 0 2.44 0.13
 3 14 0 2.29 0.12
 3 -14 0 2.26 0.12
 3 -14 -1 1.13 0.09
 3 14 1 1.3 0.1
 -3 -14 1 1.4 0.09
 -3 14 -1 1.16 0.09
 3 -14 1 1.24 0.09
 -3 14 1 1.17 0.09
 3 14 -1 1.34 0.09
 -3 14 -2 0.77 0.08
 3 14 2 0.9 0.08
 -3 -14 2 0.82 0.08
 -3 14 2 0.79 0.08
 3 -14 2 0.93 0.08
 3 14 -2 0.94 0.08
 -3 -14 3 1.97 0.12
 3 14 3 1.98 0.12
 -3 14 -3 1.95 0.12
 3 14 -3 2.21 0.12
 -3 14 3 2.15 0.12
 3 -14 3 1.9 0.12
 3 14 4 0.43 0.07
 -3 14 -4 0.42 0.07
 3 14 -4 0.37 0.06
 -3 14 4 0.34 0.07
 3 -15 0 0.02 0.02
 -3 15 0 0.02 0.02
 3 15 0 0.1 0.05
 -3 15 -1 0.27 0.06
 3 15 1 0.45 0.07
 3 -15 -1 0.38 0.06
 -3 -15 1 0.32 0.06
 -3 15 1 0.39 0.07
 3 -15 1 0.37 0.06
 3 15 -1 0.31 0.06
 4 0 0 32.46 0.85
 4 0 0 30.92 0.86
 -4 0 0 31.35 0.8
 -4 0 1 26.55 0.7
 -4 0 -1 26.18 0.65
 4 0 1 27.31 0.69
 4 0 1 27.3 0.7
 4 0 -1 24.19 0.7
 4 0 -1 23.28 0.7
 4 0 2 134.82 3.47
 4 0 2 122.87 3.53
 -4 0 -2 127.88 3.27
 4 0 -2 129.89 3.26
 -4 0 2 133.23 3.49
 4 0 -3 8.58 0.23
 4 0 3 9.01 0.24
 4 0 3 8.7 0.26
 -4 0 3 8.64 0.26
 -4 0 -3 8.55 0.24
 -4 0 3 8.89 0.25
 4 0 4 128.78 3.49
 4 0 4 126.19 3.54
 -4 0 4 135.23 3.48
 -4 0 4 129.93 3.54
 4 0 -4 130.24 3.27
 -4 0 -4 132.64 3.28
 4 0 5 4.55 0.13
 -4 0 -5 4.12 0.15
 4 0 5 4.6 0.16
 4 0 -5 4.32 0.14
 -4 0 5 4.43 0.15
 -4 0 -6 0.9 0.06
 -4 0 6 0.9 0.06
 -4 0 6 1.08 0.07
 4 0 -6 1.1 0.06
 4 0 6 1.04 0.07
 -4 0 7 8.55 0.27
 -4 0 -7 8.44 0.27
 4 0 -7 8.59 0.26
 4 0 7 9.07 0.29
 -4 0 7 8.94 0.29
 -4 0 8 17.36 0.53
 4 0 -8 17.12 0.49
 4 0 8 17.08 0.53
 -4 0 -8 17.52 0.5
 -4 0 9 13.27 0.42
 4 0 -9 12.31 0.38
 4 0 9 12.7 0.42
 -4 0 -9 13.08 0.4
 4 0 10 10.47 0.36
 -4 0 -10 10.54 0.35
 -4 0 10 10.82 0.37
 4 -1 0 23.34 0.6
 -4 -1 0 21.05 0.55
 4 1 0 21.28 0.6
 -4 1 0 21.35 0.56
 -4 -1 0 22.28 0.59
 4 -1 0 22.17 0.59
 4 -1 -1 86.37 2.18
 4 1 1 78.26 2.15
 -4 1 -1 82.6 1.99
 -4 -1 1 81.09 2.12
 4 -1 -1 80.55 2
 4 -1 -1 78.91 2.11
 4 1 1 79.99 2.12
 4 -1 1 79.09 2.17
 -4 -1 -1 78.61 1.99
 -4 -1 -1 80.69 2.11
 4 -1 1 69.03 2.13
 4 1 -1 76.81 2.15
 4 1 -1 79.14 1.99
 4 -1 -2 103.31 2.92
 4 -1 -2 117.14 2.72
 -4 -1 2 106.73 2.9
 -4 -1 2 109.86 2.96
 -4 1 -2 107.05 2.71
 4 1 2 110.09 2.94
 4 1 -2 108.85 2.96
 4 -1 2 107.84 2.88
 4 1 -2 105.28 2.7
 -4 -1 -2 104.88 2.71
 -4 1 -3 47.23 1.22
 4 -1 -3 45.87 1.29
 4 1 3 49.26 1.31
 4 -1 -3 47.55 1.31
 -4 -1 3 48.92 1.31
 4 1 3 46.22 1.27
 -4 -1 3 49.57 1.29
 4 -1 -3 46.85 1.21
 4 -1 3 47.6 1.31
 4 -1 3 46.42 1.28
 -4 1 3 50.13 1.29
 -4 -1 -3 48.78 1.22
 4 1 -3 47.59 1.21
 -4 -1 4 3.55 0.12
 4 -1 -4 3.48 0.11
 4 1 4 3.41 0.1
 -4 1 -4 3.61 0.12
 4 1 4 3.44 0.12
 -4 -1 4 3.21 0.12
 4 -1 4 3.62 0.13
 4 -1 4 3.31 0.11
 4 1 -4 3.75 0.11
 -4 -1 -4 3.58 0.12
 -4 1 4 3.59 0.12
 -4 1 4 3.27 0.12
 4 1 5 0.85 0.05
 4 1 5 0.81 0.04
 -4 -1 5 0.85 0.06
 -4 -1 5 0.9 0.05
 -4 1 -5 0.81 0.06
 4 -1 -5 0.81 0.05
 4 1 -5 0.8 0.05
 4 -1 5 0.92 0.06
 4 -1 5 0.82 0.04
 -4 1 5 0.88 0.05
 -4 1 5 0.92 0.06
 -4 -1 -5 0.76 0.05
 4 -1 -6 7.46 0.22
 -4 -1 6 6.78 0.24
 -4 1 -6 7.35 0.23
 -4 -1 6 7.02 0.23
 4 1 6 7.47 0.24
 4 -1 6 7.06 0.22
 -4 1 6 7.03 0.24
 -4 -1 -6 7.2 0.23
 4 1 -6 7.59 0.22
 -4 1 6 7.14 0.23
 4 -1 6 6.81 0.24
 4 1 7 2.75 0.12
 -4 -1 7 2.73 0.13
 4 -1 -7 2.72 0.11
 -4 -1 7 2.85 0.12
 -4 1 -7 2.78 0.12
 4 -1 7 2.97 0.13
 -4 1 7 2.83 0.13
 -4 1 7 2.82 0.11
 -4 -1 -7 2.75 0.12
 4 1 -7 2.83 0.11
 4 1 8 1.17 0.08
 4 -1 -8 1.2 0.08
 -4 1 -8 1.28 0.09
 -4 -1 8 1.4 0.09
 -4 1 8 1.4 0.09
 4 1 -8 1.18 0.08
 -4 -1 -8 1.31 0.09
 4 -1 8 1.28 0.09
 -4 -1 9 4.15 0.18
 -4 1 -9 4.02 0.17
 4 1 9 4.21 0.17
 4 -1 -9 3.73 0.16
 4 -1 9 4.08 0.18
 -4 -1 -9 4.13 0.17
 -4 1 9 4.1 0.18
 4 1 -9 3.7 0.16
 -4 1 -10 2.31 0.13
 4 1 10 2.34 0.13
 -4 -1 10 2.17 0.13
 4 -1 10 2.16 0.13
 -4 -1 -10 2.34 0.13
 -4 1 10 2.24 0.13
 4 2 0 20.02 0.54
 4 -2 0 19.69 0.54
 -4 -2 0 19.29 0.5
 -4 2 0 19.35 0.5
 -4 -2 0 20.2 0.53
 4 -2 -1 3.41 0.11
 4 -2 -1 3.27 0.1
 -4 2 -1 3.44 0.1
 -4 -2 1 3.42 0.11
 4 2 1 3.41 0.1
 -4 -2 -1 3.49 0.1
 4 -2 1 3.45 0.11
 4 -2 1 3.49 0.11
 4 2 -1 3.46 0.1
 -4 -2 -1 3.57 0.1
 -4 2 1 3.34 0.1
 4 2 -1 3.48 0.09
 -4 -2 2 56.06 1.48
 4 -2 -2 54.26 1.5
 4 2 2 55.51 1.5
 4 -2 -2 55.94 1.39
 -4 2 -2 56.07 1.4
 4 -2 -2 55.45 1.48
 -4 -2 2 54.1 1.5
 4 -2 2 53.88 1.48
 4 -2 2 55.29 1.51
 -4 -2 -2 55.55 1.4
 4 2 -2 55.7 1.39
 4 2 3 8.03 0.23
 -4 -2 3 7.91 0.24
 4 -2 -3 7.95 0.22
 -4 2 -3 8.08 0.23
 4 -2 -3 7.8 0.23
 4 -2 -3 7.57 0.24
 -4 -2 3 7.58 0.24
 4 -2 3 7.95 0.23
 4 2 -3 8.01 0.22
 4 -2 3 8.11 0.24
 -4 -2 -3 7.76 0.22
 -4 2 3 8.24 0.23
 -4 -2 4 16.88 0.48
 -4 2 -4 16.95 0.46
 -4 -2 4 16.97 0.49
 4 -2 -4 16.6 0.45
 4 2 4 17.03 0.48
 4 -2 -4 16.21 0.49
 -4 2 4 17.57 0.48
 4 2 -4 17.19 0.45
 -4 -2 -4 16.84 0.46
 4 -2 4 17.2 0.47
 -4 2 4 17.64 0.49
 4 -2 4 16.84 0.49
 -4 -2 5 7.1 0.22
 4 2 5 6.99 0.22
 4 -2 -5 7.2 0.21
 -4 -2 5 6.85 0.23
 -4 2 -5 6.98 0.22
 -4 2 5 7.04 0.22
 4 -2 5 6.82 0.23
 4 2 -5 6.86 0.21
 -4 -2 -5 6.7 0.21
 -4 2 5 7.23 0.23
 4 -2 5 7.05 0.21
 -4 -2 6 2.89 0.13
 4 -2 -6 3.09 0.11
 -4 -2 6 2.87 0.12
 -4 2 -6 3 0.12
 4 2 6 3.02 0.12
 4 -2 6 2.96 0.13
 4 -2 6 3.02 0.11
 -4 -2 -6 2.84 0.12
 -4 2 6 3.08 0.12
 -4 2 6 2.97 0.11
 4 2 -6 3.02 0.11
 4 -2 -7 1.42 0.08
 -4 2 -7 1.55 0.09
 -4 -2 7 1.49 0.08
 4 2 7 1.4 0.08
 -4 -2 7 1.53 0.09
 -4 2 7 1.49 0.09
 4 -2 7 1.43 0.09
 4 2 -7 1.53 0.08
 -4 -2 -7 1.45 0.09
 -4 -2 8 2.82 0.13
 -4 2 -8 3.02 0.14
 -4 -2 8 3.25 0.15
 4 -2 -8 2.99 0.12
 4 2 8 3.02 0.13
 -4 2 8 2.97 0.14
 4 2 -8 2.81 0.12
 4 -2 8 3.11 0.14
 -4 -2 -8 3.09 0.14
 -4 -2 9 0.1 0.05
 -4 2 -9 0.21 0.06
 4 2 9 0.16 0.05
 -4 2 9 0.2 0.05
 4 -2 9 0.15 0.06
 -4 -2 -9 0.18 0.06
 4 2 10 3.07 0.15
 -4 -2 10 3.01 0.16
 -4 2 -10 2.98 0.15
 -4 2 10 3.2 0.15
 -4 -2 -10 3.03 0.15
 4 -2 10 3.04 0.16
 4 -3 0 10.58 0.29
 -4 -3 0 9.85 0.28
 -4 -3 0 10.26 0.27
 4 -3 0 10.13 0.29
 -4 -3 0 9.92 0.28
 -4 -3 1 0.43 0.02
 4 -3 -1 0.46 0.03
 4 -3 -1 0.53 0.03
 4 -3 -1 0.48 0.02
 -4 -3 -1 0.41 0.03
 4 -3 1 0.41 0.03
 4 3 -1 0.52 0.02
 -4 3 1 0.58 0.03
 -4 -3 -1 0.51 0.02
 -4 3 -2 10.6 0.29
 4 3 2 10.16 0.29
 4 -3 -2 10.5 0.3
 -4 -3 2 10.35 0.3
 4 -3 -2 10.63 0.28
 -4 -3 2 10.3 0.3
 4 -3 -2 10.61 0.3
 4 -3 2 10.79 0.3
 -4 -3 -2 10.7 0.29
 -4 -3 -2 10.78 0.28
 4 3 -2 10.39 0.28
 4 -3 -3 1.98 0.08
 4 -3 -3 2.12 0.07
 4 -3 -3 2.06 0.08
 -4 3 -3 2.07 0.08
 -4 -3 3 1.97 0.08
 4 3 3 2.06 0.07
 4 3 -3 2.2 0.07
 4 -3 3 1.92 0.08
 4 -3 3 2.03 0.08
 -4 -3 -3 2.22 0.08
 4 -3 -4 8.51 0.25
 4 3 4 8.12 0.25
 -4 -3 4 7.99 0.26
 4 -3 -4 8.38 0.26
 4 -3 -4 8.63 0.24
 -4 3 -4 8.41 0.25
 -4 -3 4 8.35 0.26
 -4 3 4 8.64 0.26
 -4 3 4 8.7 0.25
 4 -3 4 9.01 0.27
 -4 -3 -4 8.3 0.25
 4 3 -4 8.56 0.24
 4 -3 4 8.51 0.25
 -4 -3 5 8.05 0.25
 -4 3 -5 7.58 0.24
 4 3 5 7.84 0.24
 -4 -3 5 7.72 0.25
 4 -3 -5 7.79 0.23
 -4 3 5 7.9 0.24
 4 -3 5 7.46 0.25
 -4 3 5 8.03 0.25
 4 -3 5 7.58 0.24
 4 3 -5 7.93 0.23
 -4 -3 -5 7.86 0.24
 -4 3 -6 6.43 0.21
 4 3 6 6.49 0.21
 -4 -3 6 6.14 0.22
 4 -3 -6 6.42 0.2
 -4 -3 6 6.37 0.21
 4 -3 6 6.11 0.22
 -4 -3 -6 6.34 0.21
 -4 3 6 6.54 0.2
 -4 3 6 6.61 0.22
 4 -3 6 6.27 0.2
 4 3 -6 6.69 0.2
 -4 -3 7 2.06 0.11
 4 -3 -7 2.1 0.1
 4 3 7 2.04 0.1
 -4 -3 7 2.09 0.1
 -4 3 -7 2 0.1
 -4 -3 -7 2.03 0.1
 4 -3 7 1.98 0.11
 -4 3 7 1.99 0.1
 4 3 -7 2.02 0.09
 -4 3 -8 8.12 0.26
 -4 -3 8 7.49 0.26
 4 -3 -8 7.66 0.25
 4 3 8 7.51 0.26
 -4 -3 8 8.14 0.28
 -4 3 8 7.41 0.27
 4 3 -8 7.57 0.25
 4 -3 8 7.97 0.28
 -4 -3 -8 8.21 0.26
 4 3 9 2.38 0.12
 -4 3 -9 2.51 0.13
 -4 -3 9 2.65 0.14
 4 -3 -9 2.49 0.12
 -4 -3 -9 2.66 0.13
 4 -3 9 2.62 0.14
 -4 3 9 2.65 0.13
 -4 4 0 26.6 0.69
 -4 -4 0 26.11 0.73
 -4 -4 0 26.62 0.73
 -4 -4 0 27.23 0.69
 4 -4 0 26.12 0.74
 4 -4 0 26.89 0.73
 4 4 0 28.08 0.69
 4 -4 -1 3.54 0.12
 -4 4 -1 3.96 0.12
 4 -4 -1 3.77 0.12
 -4 -4 1 3.66 0.11
 -4 -4 1 3.7 0.12
 -4 -4 -1 3.69 0.11
 4 -4 1 3.96 0.12
 -4 4 1 3.64 0.11
 -4 -4 -1 3.94 0.11
 4 4 -1 3.79 0.11
 4 -4 1 3.67 0.12
 4 -4 -2 13.94 0.37
 -4 -4 2 14.04 0.39
 -4 -4 2 13.9 0.39
 -4 4 -2 13.95 0.37
 4 -4 -2 13.56 0.39
 4 -4 -2 13.55 0.39
 4 4 2 13.11 0.38
 4 -4 2 13.64 0.39
 -4 -4 -2 14.2 0.37
 4 -4 2 13.58 0.4
 -4 -4 -2 13.65 0.37
 4 4 -2 13.88 0.36
 -4 4 -3 5.11 0.16
 -4 -4 3 5.15 0.16
 4 -4 -3 4.88 0.16
 4 4 3 5.08 0.15
 -4 -4 3 5.17 0.17
 4 -4 -3 5.19 0.15
 4 -4 -3 5.16 0.16
 4 -4 3 5.25 0.17
 4 -4 3 5.21 0.17
 -4 -4 -3 5.04 0.16
 -4 -4 -3 5.15 0.14
 4 4 -3 5 0.15
 -4 -4 4 12.01 0.37
 4 -4 -4 12.31 0.34
 -4 4 -4 12.38 0.35
 4 -4 -4 12.76 0.36
 4 -4 -4 12.99 0.37
 4 4 4 12.37 0.35
 -4 -4 4 12.16 0.37
 4 4 -4 12.38 0.34
 4 -4 4 12.79 0.36
 -4 -4 -4 11.95 0.35
 4 -4 4 12.49 0.37
 4 4 5 14.55 0.41
 4 -4 -5 14.5 0.41
 -4 4 -5 13.32 0.4
 4 -4 -5 14.06 0.39
 -4 -4 5 13.8 0.43
 -4 -4 5 14.72 0.42
 -4 -4 -5 14.03 0.4
 4 -4 5 14.2 0.43
 4 -4 5 14.03 0.41
 4 4 -5 14.36 0.39
 -4 4 5 14.45 0.41
 -4 4 5 14.19 0.42
 4 -4 -6 2.6 0.11
 -4 -4 6 2.38 0.11
 -4 4 -6 2.52 0.11
 4 4 6 2.53 0.1
 -4 -4 6 2.4 0.11
 -4 4 6 2.67 0.1
 4 -4 6 2.46 0.12
 -4 4 6 2.51 0.11
 4 -4 6 2.52 0.1
 -4 -4 -6 2.44 0.11
 4 4 -6 2.53 0.1
 4 -4 -7 5.45 0.19
 4 4 7 5.65 0.19
 -4 -4 7 5.54 0.21
 -4 4 -7 5.71 0.2
 -4 -4 7 5.59 0.2
 4 -4 7 5.56 0.19
 -4 4 7 5.42 0.2
 4 4 -7 5.52 0.19
 -4 -4 -7 5.38 0.2
 4 -4 7 5.73 0.21
 4 -4 -8 1.39 0.08
 -4 -4 8 1.28 0.09
 -4 4 -8 1.33 0.09
 -4 -4 8 1.16 0.08
 -4 -4 -8 1.28 0.09
 4 4 -8 1.3 0.08
 4 -4 8 1.41 0.1
 -4 4 8 1.29 0.08
 -4 -4 9 1.79 0.12
 4 -4 -9 1.88 0.1
 -4 4 -9 1.71 0.11
 -4 4 9 1.89 0.11
 -4 -4 -9 2.09 0.11
 4 -4 9 1.8 0.12
 4 5 0 84.34 2.18
 -4 -5 0 86.46 2.32
 -4 5 0 85.73 2.19
 4 -5 0 89.09 2.33
 4 -5 0 90.79 2.36
 -4 -5 0 84.46 2.35
 -4 -5 1 5.93 0.17
 -4 5 -1 6.27 0.18
 4 -5 -1 6.02 0.18
 4 -5 -1 5.85 0.18
 -4 -5 1 5.67 0.18
 4 5 -1 5.98 0.17
 4 -5 1 5.85 0.19
 -4 -5 -1 6.14 0.18
 4 -5 1 5.89 0.18
 -4 5 1 6.11 0.17
 -4 -5 -1 6.08 0.18
 -4 -5 2 45.27 1.24
 -4 -5 2 44.1 1.23
 4 -5 -2 47.47 1.24
 4 -5 -2 44.35 1.16
 -4 5 -2 46.43 1.16
 4 -5 -2 43.8 1.23
 -4 -5 -2 46.4 1.16
 4 -5 2 43.6 1.23
 -4 -5 -2 46.89 1.22
 4 5 -2 46.79 1.16
 4 -5 2 44.68 1.25
 -4 5 -3 8.73 0.26
 -4 -5 3 8.95 0.27
 4 5 3 8.76 0.25
 -4 -5 3 8.85 0.27
 4 -5 -3 9.15 0.26
 4 -5 -3 8.34 0.25
 4 -5 -3 8.85 0.26
 4 -5 3 8.65 0.27
 -4 -5 -3 8.74 0.25
 4 5 -3 8.83 0.25
 -4 -5 -3 9.07 0.24
 4 -5 3 8.45 0.27
 -4 -5 4 10.62 0.32
 -4 5 -4 10.31 0.31
 4 -5 -4 11.06 0.31
 4 -5 -4 10.73 0.32
 4 5 4 10.65 0.3
 4 -5 -4 10.74 0.3
 -4 -5 4 10.18 0.32
 4 -5 4 10.96 0.33
 4 -5 4 11.03 0.32
 4 5 -4 10.54 0.3
 -4 -5 -4 10.16 0.31
 4 5 5 2.91 0.1
 -4 -5 5 2.94 0.12
 4 -5 -5 3.06 0.11
 -4 5 -5 2.85 0.12
 4 -5 -5 2.82 0.11
 -4 -5 5 2.72 0.12
 -4 -5 -5 2.73 0.12
 4 -5 5 2.81 0.12
 4 5 -5 2.83 0.11
 -4 5 5 2.91 0.11
 -4 5 5 2.97 0.11
 4 -5 5 2.84 0.12
 -4 -5 6 3.04 0.13
 -4 5 -6 2.8 0.12
 4 -5 -6 2.81 0.12
 -4 -5 6 2.97 0.13
 4 5 -6 2.96 0.12
 4 -5 6 3.06 0.13
 -4 5 6 3.02 0.12
 4 -5 6 3.17 0.12
 -4 -5 -6 2.78 0.12
 -4 5 -7 1.78 0.1
 4 -5 -7 1.64 0.09
 -4 -5 7 1.67 0.1
 -4 -5 7 1.68 0.09
 4 5 -7 1.57 0.08
 -4 5 7 1.65 0.09
 4 -5 7 1.62 0.09
 -4 -5 -7 1.77 0.1
 4 -5 7 1.72 0.1
 -4 5 -8 0.55 0.07
 -4 -5 8 0.34 0.06
 4 -5 -8 0.47 0.06
 -4 -5 8 0.42 0.06
 -4 -5 -8 0.59 0.07
 4 -5 8 0.49 0.07
 -4 5 8 0.43 0.05
 4 5 -8 0.37 0.05
 -4 -5 9 2.03 0.12
 4 -5 -9 1.83 0.1
 -4 -5 9 2.03 0.11
 -4 5 -9 1.89 0.11
 4 -5 9 1.86 0.12
 -4 -5 -9 1.8 0.11
 -4 6 0 0 0.01
 4 6 0 0 0.01
 -4 -6 0 0.02 0.01
 4 -6 0 0.01 0.01
 4 -6 0 0.01 0.01
 -4 -6 0 0.01 0.01
 -4 -6 1 6.32 0.21
 -4 -6 1 6.61 0.19
 -4 6 -1 6.65 0.2
 4 -6 -1 6.39 0.21
 4 -6 -1 6.89 0.2
 4 6 1 6.48 0.19
 -4 -6 -1 6.78 0.2
 4 6 -1 6.73 0.19
 4 -6 1 6.33 0.21
 -4 6 1 6.73 0.2
 -4 -6 -1 6.67 0.2
 4 -6 1 6.58 0.2
 4 -6 -2 11.51 0.34
 4 -6 -2 11.57 0.32
 -4 -6 2 11.64 0.34
 4 -6 -2 11.76 0.34
 -4 -6 2 11.9 0.34
 -4 6 -2 11.59 0.33
 -4 -6 -2 11.98 0.33
 -4 6 2 11.82 0.32
 4 -6 2 11.19 0.34
 4 6 -2 11.25 0.32
 4 -6 2 11.63 0.34
 -4 -6 -2 11.57 0.32
 4 -6 -3 4.48 0.15
 4 -6 -3 4.88 0.15
 -4 -6 3 4.58 0.16
 4 -6 -3 4.76 0.16
 -4 -6 3 4.75 0.17
 -4 6 -3 4.78 0.16
 4 6 -3 4.69 0.15
 -4 -6 -3 4.69 0.14
 -4 -6 -3 4.69 0.15
 4 -6 3 4.57 0.16
 4 -6 3 4.59 0.16
 -4 -6 4 10.85 0.34
 4 -6 -4 10.97 0.32
 -4 6 -4 10.97 0.32
 4 -6 -4 11.79 0.33
 4 -6 -4 11.52 0.33
 4 -6 4 10.48 0.34
 -4 -6 -4 11.12 0.32
 4 -6 4 10.9 0.34
 4 6 -4 11.33 0.32
 -4 -6 5 1.33 0.08
 -4 6 -5 1.4 0.08
 -4 -6 5 1.4 0.08
 4 -6 -5 1.36 0.07
 4 -6 -5 1.51 0.07
 -4 6 5 1.38 0.07
 -4 -6 -5 1.39 0.08
 4 -6 5 1.32 0.08
 4 6 -5 1.38 0.07
 -4 6 5 1.44 0.07
 4 -6 5 1.26 0.08
 -4 -6 6 14.56 0.43
 4 -6 -6 13.97 0.4
 -4 6 -6 14.02 0.41
 -4 -6 6 14.17 0.44
 4 -6 6 14.1 0.43
 4 -6 6 14 0.44
 -4 -6 -6 13.55 0.41
 -4 6 6 14.37 0.42
 4 6 -6 13.94 0.4
 -4 -6 7 1.06 0.08
 -4 -6 7 1.01 0.08
 -4 6 -7 1.16 0.08
 4 -6 -7 1.07 0.07
 4 6 -7 1.11 0.07
 -4 6 7 0.93 0.07
 4 -6 7 1.04 0.08
 -4 -6 -7 1.11 0.08
 4 -6 7 0.93 0.07
 -4 -6 8 0.19 0.06
 -4 6 -8 0.11 0.05
 -4 -6 8 0.24 0.05
 4 -6 -8 0.2 0.05
 4 -6 8 0.21 0.06
 -4 -6 -8 0.3 0.06
 4 6 -8 0.11 0.05
 4 -6 -9 0.93 0.08
 -4 -6 9 0.79 0.08
 -4 6 -9 0.78 0.08
 -4 -6 9 0.82 0.08
 -4 -6 -9 0.85 0.08
 4 -6 9 0.81 0.09
 -4 7 0 35.79 0.94
 4 -7 0 36.26 1
 -4 -7 0 36.45 0.99
 4 7 0 35.93 0.94
 4 -7 0 36.36 0.99
 -4 -7 1 0.92 0.05
 -4 -7 1 0.92 0.04
 4 -7 -1 0.99 0.05
 4 -7 -1 0.9 0.05
 -4 7 -1 0.92 0.05
 4 7 1 0.92 0.05
 4 7 -1 0.92 0.05
 4 -7 1 0.94 0.05
 4 -7 1 0.91 0.06
 -4 -7 -1 0.87 0.05
 -4 -7 -1 0.76 0.05
 -4 7 1 0.92 0.05
 -4 -7 2 11.67 0.34
 4 -7 -2 11.86 0.34
 -4 -7 2 11.13 0.35
 -4 7 -2 11.74 0.33
 4 -7 -2 11.61 0.34
 -4 -7 -2 11.84 0.33
 -4 -7 -2 12.12 0.33
 4 -7 2 11.35 0.35
 4 -7 2 11.61 0.35
 4 7 -2 11.81 0.33
 -4 7 2 11.27 0.33
 4 -7 -3 3.09 0.11
 -4 -7 3 2.89 0.12
 -4 -7 3 3.08 0.11
 4 -7 -3 2.97 0.11
 4 -7 -3 2.97 0.11
 -4 7 -3 2.97 0.12
 4 7 -3 2.97 0.11
 4 -7 3 2.81 0.12
 -4 7 3 3.06 0.11
 4 -7 3 2.9 0.12
 -4 -7 -3 2.94 0.11
 -4 -7 4 31.62 0.92
 4 -7 -4 33.73 0.91
 4 -7 -4 32.79 0.86
 -4 7 -4 31.44 0.87
 -4 -7 4 32.79 0.92
 4 -7 -4 33.62 0.91
 4 -7 4 33.8 0.92
 4 -7 4 32.12 0.93
 4 7 -4 33.2 0.86
 -4 -7 -4 32.29 0.87
 -4 -7 5 2.2 0.1
 4 -7 -5 2.04 0.1
 -4 7 -5 2 0.1
 4 -7 5 2.21 0.11
 -4 7 5 2.18 0.09
 4 7 -5 2.17 0.1
 -4 -7 -5 2.15 0.1
 4 -7 5 2.28 0.11
 -4 7 -6 1.53 0.09
 -4 -7 6 1.72 0.1
 4 -7 -6 1.66 0.09
 -4 -7 6 1.7 0.09
 4 7 -6 1.61 0.09
 4 -7 6 1.55 0.09
 -4 -7 -6 1.67 0.09
 4 -7 6 1.61 0.1
 -4 -7 7 1.92 0.11
 -4 7 -7 1.88 0.11
 4 -7 -7 1.94 0.1
 -4 -7 7 1.92 0.11
 4 -7 7 1.82 0.1
 -4 -7 -7 1.99 0.11
 4 -7 7 2 0.11
 4 7 -7 1.73 0.1
 -4 -7 8 6.28 0.23
 -4 -7 8 5.94 0.24
 -4 7 -8 6.31 0.23
 4 -7 -8 6.02 0.22
 4 -7 8 6.28 0.23
 4 7 -8 5.99 0.22
 -4 -7 -8 6.35 0.23
 4 -7 8 6.58 0.25
 -4 7 -9 1.92 0.12
 4 -7 -9 1.86 0.1
 -4 -7 9 1.75 0.12
 -4 -7 9 1.85 0.11
 4 -7 9 1.71 0.12
 -4 -7 -9 1.72 0.11
 4 -8 0 4.65 0.15
 -4 8 0 4.57 0.15
 4 8 0 4.45 0.15
 4 -8 0 4.47 0.16
 -4 -8 0 4.57 0.16
 -4 8 -1 15.39 0.43
 -4 -8 1 15.24 0.45
 4 -8 -1 16.15 0.44
 4 -8 -1 14.98 0.45
 4 8 1 14.97 0.43
 4 -8 1 15.68 0.44
 -4 8 1 15.24 0.43
 -4 -8 -1 16.16 0.44
 4 -8 1 14.66 0.45
 4 8 -1 15.5 0.43
 -4 8 -2 27.34 0.72
 4 -8 -2 27.18 0.76
 -4 -8 2 26.46 0.76
 4 -8 -2 27.82 0.75
 4 8 2 26.16 0.72
 -4 -8 2 28.6 0.75
 4 8 -2 25.98 0.71
 -4 -8 -2 27.72 0.74
 -4 8 2 26.87 0.72
 4 -8 2 26.86 0.76
 -4 -8 -2 26.7 0.72
 4 -8 2 26.03 0.76
 4 -8 -3 17.84 0.5
 -4 -8 3 18.4 0.5
 4 -8 -3 16.64 0.48
 -4 8 -3 17.43 0.49
 -4 -8 3 17.36 0.51
 4 -8 3 16.89 0.51
 -4 8 3 17.29 0.48
 4 8 -3 16.8 0.48
 -4 -8 -3 16.83 0.48
 4 -8 3 18.05 0.51
 -4 -8 4 3 0.12
 -4 -8 4 2.91 0.13
 -4 8 -4 2.97 0.13
 4 -8 -4 3.28 0.12
 4 -8 -4 3.08 0.12
 4 -8 4 2.89 0.13
 4 -8 4 3.03 0.13
 -4 -8 -4 3.05 0.13
 4 8 -4 3.18 0.12
 -4 8 -5 3.42 0.14
 -4 -8 5 3.5 0.15
 -4 -8 5 3.57 0.14
 4 -8 -5 3.52 0.14
 4 -8 5 3.64 0.15
 -4 -8 -5 3.54 0.14
 4 -8 5 3.53 0.15
 4 8 -5 3.42 0.14
 -4 8 -6 18.71 0.54
 -4 -8 6 18.36 0.56
 -4 -8 6 19.05 0.56
 4 -8 -6 18.13 0.52
 4 8 -6 18.19 0.52
 -4 -8 -6 18.57 0.53
 4 -8 6 18.41 0.56
 4 -8 6 18.96 0.57
 4 -8 -7 2.01 0.11
 -4 -8 7 2.07 0.12
 -4 -8 7 1.87 0.11
 -4 8 -7 2.05 0.12
 -4 -8 -7 1.99 0.11
 4 -8 7 2.06 0.11
 4 -8 7 2.15 0.12
 4 8 -7 1.95 0.1
 -4 -8 8 3.47 0.16
 4 -8 -8 3.26 0.15
 -4 -8 8 3.36 0.16
 -4 8 -8 3.55 0.16
 4 -8 8 3.49 0.15
 -4 -8 -8 3.36 0.16
 4 -8 8 3.39 0.16
 4 9 0 10.61 0.33
 -4 9 0 11.37 0.33
 4 -9 0 11.89 0.33
 4 -9 0 10.98 0.35
 -4 -9 0 11.47 0.34
 4 -9 -1 2.27 0.1
 -4 -9 1 2.04 0.1
 4 9 1 1.99 0.09
 -4 9 -1 2.05 0.09
 4 -9 1 2.02 0.08
 -4 -9 -1 2.03 0.09
 4 9 -1 2.02 0.09
 -4 9 1 1.96 0.09
 4 -9 1 2.06 0.1
 4 -9 -2 0.24 0.04
 -4 9 -2 0.3 0.04
 -4 -9 2 0.23 0.04
 4 9 2 0.31 0.04
 4 -9 2 0.29 0.04
 -4 -9 -2 0.21 0.03
 4 9 -2 0.24 0.04
 4 -9 2 0.27 0.05
 -4 9 2 0.25 0.04
 -4 -9 3 1.52 0.09
 -4 9 -3 1.48 0.08
 4 -9 -3 1.59 0.08
 -4 -9 -3 1.43 0.08
 -4 9 3 1.47 0.08
 4 -9 3 1.46 0.08
 4 -9 3 1.58 0.09
 4 9 -3 1.55 0.08
 4 -9 -4 6.25 0.21
 -4 9 -4 6.57 0.22
 4 -9 -4 6.3 0.21
 -4 -9 4 6.12 0.21
 -4 -9 4 6.36 0.23
 -4 9 4 6.48 0.21
 4 -9 4 6.55 0.23
 -4 -9 -4 6.29 0.21
 4 9 -4 6.29 0.21
 4 -9 4 6.1 0.22
 -4 -9 5 0.92 0.08
 -4 -9 5 0.82 0.06
 -4 9 -5 0.89 0.07
 4 -9 -5 0.88 0.07
 4 -9 5 0.9 0.07
 4 -9 5 0.9 0.07
 4 9 -5 0.83 0.06
 -4 -9 -5 0.75 0.06
 -4 -9 6 0.73 0.07
 -4 -9 6 0.83 0.08
 4 -9 -6 0.7 0.07
 -4 9 -6 0.73 0.07
 4 -9 6 0.84 0.07
 4 -9 6 0.89 0.08
 4 9 -6 0.81 0.07
 -4 -9 -6 0.8 0.07
 -4 -9 7 0.17 0.06
 -4 9 -7 0.24 0.06
 4 -9 -7 0.19 0.05
 -4 -9 7 0.13 0.05
 4 -9 7 0.3 0.06
 -4 -9 -7 0.12 0.05
 4 -9 7 0.24 0.06
 4 9 -7 0.16 0.05
 -4 -9 8 0.78 0.08
 -4 -9 8 0.94 0.09
 4 -9 -8 0.9 0.08
 -4 9 -8 0.78 0.08
 -4 -9 -8 0.94 0.08
 4 -9 8 0.93 0.08
 4 -9 8 0.86 0.08
 -4 -10 0 4.7 0.17
 4 10 0 4.17 0.16
 4 -10 0 4.54 0.17
 -4 10 0 4.67 0.17
 4 -10 -1 0.56 0.05
 4 10 1 0.61 0.06
 -4 -10 1 0.56 0.05
 -4 10 -1 0.56 0.06
 4 10 -1 0.53 0.05
 -4 -10 -1 0.58 0.05
 -4 10 1 0.5 0.05
 4 -10 1 0.51 0.06
 4 10 2 0.8 0.06
 -4 -10 2 0.87 0.07
 -4 10 -2 0.76 0.06
 4 -10 -2 0.79 0.06
 4 10 -2 0.79 0.06
 -4 10 2 0.93 0.07
 4 -10 2 0.85 0.07
 4 -10 2 0.89 0.06
 4 10 3 5.09 0.19
 4 -10 -3 5.24 0.19
 -4 -10 3 5.21 0.2
 -4 10 -3 5.27 0.19
 4 -10 3 5.16 0.2
 4 10 -3 5.24 0.19
 -4 -10 -3 5.58 0.19
 -4 10 3 5.42 0.19
 4 -10 3 5.34 0.19
 -4 -10 4 3.1 0.14
 -4 10 -4 3.41 0.14
 4 -10 4 3.33 0.15
 4 10 -4 3.14 0.13
 -4 -10 -4 3.28 0.14
 4 -10 4 2.95 0.13
 -4 10 4 3.34 0.14
 -4 -10 5 1.41 0.1
 -4 10 -5 1.36 0.09
 4 -10 -5 1.38 0.09
 4 10 -5 1.36 0.09
 -4 -10 -5 1.5 0.09
 4 -10 5 1.3 0.09
 4 -10 5 1.63 0.1
 -4 10 5 1.34 0.09
 4 -10 -6 2.31 0.12
 -4 -10 6 2.38 0.13
 -4 10 -6 2.16 0.12
 -4 -10 6 2.04 0.11
 4 10 -6 1.94 0.11
 -4 -10 -6 2.21 0.12
 4 -10 6 2.24 0.12
 4 -10 6 2.32 0.12
 -4 10 6 2.25 0.11
 -4 -10 7 5.01 0.21
 -4 -10 7 4.86 0.2
 -4 10 -7 5.2 0.2
 4 -10 -7 4.99 0.19
 4 -10 7 4.72 0.2
 -4 -10 -7 4.84 0.19
 4 10 -7 4.78 0.19
 4 -10 7 4.89 0.2
 4 11 0 8.4 0.27
 4 -11 0 8.97 0.29
 -4 11 0 8.85 0.28
 -4 -11 0 8.76 0.28
 -4 11 -1 0.14 0.04
 -4 -11 1 0.11 0.04
 4 -11 -1 0.07 0.04
 4 11 1 0.1 0.04
 -4 11 1 0.12 0.04
 4 -11 1 0.06 0.03
 -4 -11 -1 0.11 0.03
 4 11 -1 0.16 0.04
 4 -11 -2 1.44 0.09
 -4 11 -2 1.56 0.09
 -4 -11 2 1.82 0.1
 4 11 2 1.63 0.09
 4 11 -2 1.56 0.09
 -4 11 2 1.51 0.09
 4 -11 2 1.6 0.1
 4 11 3 0.87 0.07
 -4 -11 3 0.93 0.08
 -4 11 -3 0.92 0.08
 4 -11 -3 0.88 0.07
 4 11 -3 0.92 0.07
 -4 11 3 1 0.07
 4 -11 3 0.88 0.08
 -4 11 -4 3.63 0.16
 4 11 4 3.77 0.16
 -4 -11 4 3.49 0.16
 -4 11 4 3.87 0.16
 4 -11 4 3.66 0.16
 -4 -11 -4 3.97 0.16
 4 11 -4 3.79 0.15
 4 -11 4 3.15 0.14
 -4 11 -5 0.01 0.02
 -4 -11 5 -0.01 0.02
 4 11 -5 0 0.01
 -4 11 5 0 0.01
 -4 -11 -5 -0.01 0.01
 4 -11 5 0.02 0.02
 4 -11 5 0.01 0.01
 -4 11 -6 4.34 0.19
 -4 -11 6 4.42 0.19
 4 -11 -6 4.55 0.18
 -4 -11 -6 4.39 0.18
 4 11 -6 4.19 0.17
 -4 11 6 4.76 0.18
 4 -11 6 4.43 0.19
 4 -11 6 4.33 0.18
 -4 11 -7 1.63 0.11
 4 -11 -7 1.6 0.1
 4 11 -7 1.62 0.1
 -4 11 7 1.67 0.1
 -4 -11 -7 1.45 0.1
 -4 -12 0 0.65 0.06
 -4 12 0 0.75 0.07
 4 -12 0 0.69 0.07
 4 12 0 0.78 0.07
 -4 12 -1 1.13 0.08
 4 12 1 1 0.08
 4 -12 -1 0.98 0.07
 -4 -12 1 0.89 0.07
 -4 -12 -1 0.86 0.06
 -4 12 1 0.92 0.08
 4 12 -1 0.91 0.07
 4 -12 1 1 0.08
 4 12 2 7.91 0.27
 4 -12 -2 7.58 0.27
 -4 12 -2 7.99 0.27
 -4 -12 2 7.94 0.28
 4 12 -2 7.77 0.26
 4 -12 2 8.17 0.28
 -4 12 2 8.09 0.27
 -4 12 -3 0.07 0.05
 4 12 3 0.07 0.05
 -4 -12 3 0.02 0.02
 4 12 -3 0.19 0.05
 -4 12 3 0.1 0.05
 4 -12 3 0.01 0.02
 -4 -12 4 0.73 0.08
 -4 12 -4 0.77 0.08
 4 12 4 0.87 0.08
 -4 12 4 0.82 0.08
 4 12 -4 0.61 0.07
 4 -12 4 0.65 0.07
 -4 -12 5 0.55 0.07
 4 12 5 0.58 0.07
 -4 12 -5 0.56 0.07
 -4 12 5 0.56 0.07
 -4 -12 -5 0.64 0.07
 4 12 -5 0.62 0.07
 4 -12 5 0.65 0.07
 -4 12 -6 0.29 0.07
 -4 -12 6 0.38 0.07
 4 12 6 0.32 0.06
 -4 12 6 0.31 0.06
 4 12 -6 0.33 0.06
 -4 -12 -6 0.37 0.06
 4 -12 6 0.33 0.07
 -4 13 0 5.11 0.19
 4 13 0 4.44 0.18
 4 -13 0 4.66 0.19
 -4 -13 0 4.68 0.18
 4 13 1 0.52 0.06
 -4 -13 1 0.4 0.06
 4 -13 -1 0.49 0.06
 -4 13 -1 0.4 0.06
 -4 13 1 0.43 0.06
 4 13 -1 0.53 0.06
 4 -13 1 0.41 0.06
 4 -13 -2 0.28 0.05
 4 13 2 0.32 0.06
 -4 -13 2 0.38 0.06
 -4 13 -2 0.41 0.06
 4 13 -2 0.36 0.06
 4 -13 2 0.39 0.06
 -4 13 2 0.43 0.06
 -4 -13 3 1.07 0.09
 -4 13 -3 1.12 0.09
 4 13 3 0.93 0.08
 -4 13 3 1.16 0.09
 4 13 -3 1.05 0.08
 4 -13 3 1.12 0.09
 -4 -13 4 0.28 0.06
 4 13 4 0.15 0.06
 -4 13 -4 0.31 0.06
 4 -13 4 0.26 0.06
 -4 13 4 0.23 0.06
 4 13 -4 0.16 0.05
 4 13 5 1.34 0.1
 -4 13 -5 1.52 0.11
 -4 -13 5 1.34 0.11
 -4 13 5 1.55 0.1
 4 13 -5 1.37 0.1
 4 -13 5 1.37 0.1
 4 14 0 0.92 0.08
 -4 14 0 1.01 0.09
 4 -14 0 1.01 0.08
 -4 -14 0 0.82 0.07
 4 -14 -1 2.38 0.13
 -4 14 -1 2.5 0.13
 4 14 1 2.73 0.13
 -4 -14 1 2.56 0.13
 4 14 -1 2.44 0.13
 -4 14 1 2.94 0.14
 4 -14 1 2.65 0.14
 -4 -14 2 0.44 0.06
 -4 14 -2 0.41 0.06
 4 14 2 0.39 0.06
 4 -14 2 0.51 0.07
 -4 14 2 0.4 0.07
 4 14 -2 0.38 0.06
 -4 14 -3 1.02 0.09
 -4 -14 3 0.99 0.09
 4 14 3 0.87 0.08
 -4 14 3 1.02 0.09
 4 14 -3 1.06 0.09
 4 -14 3 1.05 0.09
 4 -15 0 1.5 0.1
 -4 15 0 1.44 0.1
 4 15 0 1.3 0.1
 4 15 1 0.14 0.06
 4 -15 -1 0.27 0.06
 -4 15 -1 0.17 0.06
 -4 -15 1 0.18 0.05
 4 -15 1 0.18 0.06
 -4 15 1 0.11 0.06
 4 15 -1 0.24 0.06
 -5 0 0 -0.08 0.01
 5 0 0 -0.09 0.01
 5 0 0 -0.1 0.01
 -5 0 -1 0.01 0.01
 5 0 -1 0.01 0.01
 5 0 1 0 0.01
 -5 0 1 0.01 0.01
 5 0 -2 -0.01 0.01
 5 0 2 0.01 0.01
 -5 0 -2 0 0.01
 5 0 2 0.02 0.01
 -5 0 2 0.02 0.02
 5 0 -3 0.01 0.01
 5 0 3 0.02 0.01
 5 0 3 0.03 0.02
 -5 0 3 0.02 0.02
 -5 0 -3 0.03 0.02
 5 0 -3 0.04 0.02
 -5 0 -4 0.11 0.03
 5 0 -4 0.04 0.02
 5 0 4 0.03 0.02
 -5 0 4 0.01 0.01
 -5 0 4 0.07 0.02
 5 0 -5 0 0.01
 -5 0 5 0.04 0.02
 -5 0 5 0.01 0.01
 5 0 5 0.04 0.03
 -5 0 -5 0 0.01
 5 0 6 0.02 0.01
 5 0 -6 0 0.01
 -5 0 -6 0 0.01
 -5 0 6 -0.01 0.01
 -5 0 6 0.01 0.01
 -5 0 7 0 0.01
 5 0 7 0 0.01
 -5 0 -7 0.01 0.01
 5 0 -7 0.01 0.01
 -5 0 7 -0.02 0.01
 -5 0 -8 -0.01 0.02
 -5 0 8 -0.01 0.01
 5 0 8 0.02 0.02
 5 0 -8 0 0.01
 5 0 9 0 0.02
 -5 0 9 0 0.02
 -5 0 -9 0.01 0.02
 -5 0 -10 0.08 0.06
 5 0 10 0 0.02
 -5 -1 0 190.64 4.79
 5 1 0 175.62 4.86
 5 -1 0 180.57 4.87
 -5 -1 0 175.15 4.48
 -5 1 0 185.35 4.49
 5 -1 0 165.98 4.79
 5 1 1 38.09 1
 5 -1 -1 36.95 1.01
 5 -1 -1 38.29 1.03
 5 1 1 37.62 1.02
 -5 1 -1 37.18 0.95
 5 -1 -1 37.07 0.94
 -5 -1 1 39.16 1.01
 -5 1 1 36.75 0.94
 -5 -1 -1 37.73 1
 5 -1 1 38.93 1.03
 -5 -1 -1 38.32 0.95
 5 1 -1 36.98 0.94
 5 -1 1 36.24 1.01
 5 1 -1 36.48 1.02
 5 -1 -2 76.32 1.99
 5 -1 -2 71.71 1.83
 5 -1 -2 71.97 1.96
 -5 1 -2 72.16 1.84
 5 1 2 73.31 1.98
 5 1 2 72.5 1.94
 -5 -1 2 74.36 1.96
 -5 1 2 76.42 1.96
 5 -1 2 73.57 1.95
 5 1 -2 70.59 1.99
 5 -1 2 71.8 1.98
 5 1 -2 71.9 1.83
 -5 -1 -2 74.21 1.84
 5 1 3 2.83 0.09
 5 -1 -3 2.79 0.1
 5 -1 -3 2.9 0.09
 -5 1 -3 2.71 0.09
 5 1 3 2.67 0.08
 5 -1 -3 2.79 0.1
 -5 -1 3 2.63 0.1
 5 1 -3 2.77 0.08
 -5 -1 -3 2.71 0.09
 5 -1 3 2.72 0.09
 -5 1 3 2.93 0.1
 5 -1 3 2.7 0.1
 5 1 4 2.28 0.07
 -5 -1 4 2.28 0.1
 -5 -1 4 2.49 0.09
 5 -1 -4 2.5 0.08
 5 1 4 2.42 0.09
 -5 1 -4 2.77 0.1
 -5 -1 -4 2.61 0.09
 -5 1 4 2.38 0.09
 -5 1 4 2.45 0.09
 5 -1 4 2.24 0.09
 5 1 -4 2.62 0.08
 5 -1 4 2.36 0.08
 5 -1 -5 1.39 0.06
 -5 1 -5 1.38 0.07
 -5 -1 5 1.36 0.07
 5 1 5 1.35 0.07
 -5 -1 5 1.3 0.07
 5 -1 5 1.45 0.06
 -5 1 5 1.28 0.07
 5 1 -5 1.45 0.06
 5 -1 5 1.34 0.07
 -5 1 5 1.31 0.06
 -5 -1 -5 1.39 0.07
 -5 1 -6 15.58 0.44
 5 -1 -6 15.83 0.43
 5 1 6 16.33 0.47
 -5 -1 6 14.91 0.45
 -5 -1 6 15.25 0.47
 -5 -1 -6 15.66 0.44
 5 1 -6 15.63 0.43
 -5 1 6 15.45 0.47
 5 -1 6 15.26 0.47
 -5 1 6 15.77 0.45
 -5 1 -7 2.19 0.11
 -5 -1 7 2.01 0.11
 5 -1 -7 2.1 0.09
 5 1 7 2.13 0.1
 -5 -1 7 2.02 0.1
 -5 -1 -7 2.1 0.1
 -5 1 7 2.16 0.11
 5 -1 7 2.07 0.11
 -5 1 7 2.14 0.09
 5 1 -7 2.13 0.09
 5 1 8 6.26 0.23
 -5 -1 8 5.99 0.21
 5 -1 -8 5.93 0.21
 -5 -1 8 6.58 0.24
 -5 1 -8 6.43 0.22
 -5 -1 -8 6.29 0.22
 -5 1 8 6.34 0.23
 5 -1 8 6.6 0.23
 5 1 -8 5.91 0.2
 5 1 9 0.49 0.06
 -5 -1 9 0.39 0.07
 -5 1 -9 0.35 0.06
 -5 -1 -9 0.29 0.06
 5 -1 9 0.43 0.07
 -5 1 9 0.44 0.07
 5 1 10 0.14 0.05
 -5 1 -10 0.19 0.06
 -5 -1 10 0.13 0.06
 5 -1 10 0.08 0.06
 -5 -1 -10 0.17 0.06
 -5 -2 0 196.04 4.98
 -5 -2 0 205.66 5.31
 -5 2 0 197.33 5
 5 2 0 212.81 5.37
 5 -2 0 179.34 5.29
 5 -2 -1 25.22 0.67
 -5 -2 1 25.1 0.67
 -5 2 -1 24.91 0.63
 5 2 1 24.57 0.67
 5 -2 -1 25.03 0.68
 5 -2 1 25.09 0.68
 -5 2 1 23.98 0.62
 -5 -2 -1 23.88 0.63
 5 -2 1 24.71 0.67
 -5 -2 -1 24.8 0.66
 5 2 -1 25.22 0.62
 5 2 -1 23.24 0.68
 5 -2 -2 18.2 0.48
 5 2 2 18.3 0.51
 -5 2 -2 19.16 0.48
 -5 -2 2 18.25 0.52
 5 -2 -2 19.07 0.52
 -5 -2 2 18.84 0.51
 5 -2 -2 17.63 0.51
 -5 -2 -2 19.06 0.48
 5 -2 2 18.83 0.52
 5 2 -2 18.69 0.47
 5 -2 2 18.1 0.51
 -5 -2 3 10.39 0.32
 -5 2 -3 10.92 0.3
 5 -2 -3 10.89 0.29
 5 2 3 10.84 0.31
 -5 -2 3 11.1 0.31
 5 -2 -3 10.77 0.31
 5 -2 3 10.61 0.32
 -5 -2 -3 11 0.3
 5 2 -3 10.47 0.29
 5 -2 3 10.69 0.31
 -5 2 3 10.83 0.31
 5 -2 -4 21.36 0.62
 5 2 4 21.69 0.61
 5 -2 -4 22.96 0.57
 -5 2 -4 21.82 0.58
 -5 -2 4 21.7 0.62
 5 -2 -4 21.15 0.61
 -5 -2 4 21.6 0.61
 -5 2 4 22.89 0.61
 5 2 -4 22.07 0.57
 -5 2 4 22.57 0.62
 5 -2 4 21 0.6
 -5 -2 -4 21.13 0.58
 5 -2 4 22.5 0.63
 -5 -2 5 0.46 0.04
 5 -2 -5 0.54 0.04
 5 2 5 0.55 0.04
 -5 2 -5 0.51 0.05
 -5 -2 5 0.56 0.05
 -5 2 5 0.54 0.04
 5 -2 5 0.51 0.04
 -5 2 5 0.62 0.05
 5 2 -5 0.61 0.04
 5 -2 5 0.57 0.05
 -5 -2 -5 0.53 0.05
 5 -2 -6 4.31 0.14
 5 2 6 4 0.15
 -5 -2 6 3.72 0.16
 -5 2 -6 4.17 0.15
 -5 -2 6 3.84 0.15
 -5 2 6 4.19 0.16
 5 -2 6 4.15 0.16
 -5 2 6 4.17 0.14
 -5 -2 -6 4.15 0.15
 5 -2 6 4.05 0.14
 5 2 -6 4.25 0.14
 5 2 7 2.1 0.1
 -5 -2 7 2.19 0.1
 -5 -2 7 2.35 0.12
 -5 2 -7 2.32 0.11
 5 -2 -7 2.47 0.1
 -5 2 7 2.35 0.1
 -5 -2 -7 2.26 0.11
 -5 2 7 2.29 0.11
 5 -2 7 2.15 0.11
 5 2 -7 2.31 0.1
 -5 -2 8 3.86 0.16
 5 -2 -8 4.06 0.15
 5 2 8 4.12 0.17
 -5 -2 8 4.13 0.18
 -5 2 -8 4.49 0.17
 -5 -2 -8 4.31 0.17
 -5 2 8 4.14 0.17
 5 2 -8 4.08 0.15
 5 -2 8 4.23 0.18
 -5 2 -9 0.3 0.06
 5 2 9 0.34 0.06
 -5 -2 9 0.48 0.07
 -5 2 9 0.44 0.06
 -5 -2 -9 0.35 0.06
 5 -2 9 0.32 0.06
 -5 -2 10 3.14 0.16
 -5 2 -10 3.15 0.16
 5 2 10 3.19 0.16
 5 -2 10 3.05 0.16
 -5 2 10 3.28 0.16
 -5 -2 -10 3.42 0.16
 5 -3 0 1.16 0.05
 -5 -3 0 1.17 0.04
 5 -3 0 1 0.05
 5 3 0 1.04 0.04
 -5 3 0 1.17 0.04
 -5 -3 0 1.17 0.04
 -5 -3 1 13.3 0.36
 5 -3 -1 13.69 0.37
 -5 -3 1 12.53 0.36
 5 -3 -1 13.15 0.37
 -5 3 -1 12.68 0.34
 5 3 1 12.87 0.36
 5 3 -1 13.27 0.34
 5 -3 1 13.05 0.37
 -5 -3 -1 13.09 0.36
 5 3 -1 12.68 0.36
 -5 -3 -1 13.18 0.34
 5 -3 1 13.49 0.37
 -5 3 1 12.69 0.34
 -5 3 -2 15.94 0.43
 -5 -3 2 16.43 0.46
 -5 -3 2 16.11 0.46
 5 -3 -2 15.64 0.46
 5 -3 -2 16.16 0.42
 5 -3 -2 16.59 0.45
 5 3 2 15.98 0.45
 -5 -3 -2 15.93 0.43
 -5 -3 -2 16.57 0.43
 5 -3 2 16.78 0.45
 5 -3 2 16.36 0.46
 5 3 -2 16.17 0.42
 -5 -3 3 37.91 1.04
 5 -3 -3 37.06 0.96
 5 -3 -3 37.55 1.04
 -5 -3 3 37.47 1.03
 5 -3 -3 38.61 1.03
 5 3 3 37.52 1.03
 -5 3 -3 37.34 0.97
 -5 -3 -3 38.07 0.97
 5 -3 3 37.53 1.04
 5 3 -3 38.31 0.96
 5 -3 3 37.56 1.02
 5 -3 -4 14.21 0.4
 5 -3 -4 14.17 0.41
 5 3 4 13.69 0.39
 -5 -3 4 13.66 0.41
 -5 -3 4 13.49 0.4
 -5 3 -4 13.62 0.38
 5 -3 -4 14.11 0.37
 -5 -3 -4 13.41 0.38
 5 -3 4 13.49 0.41
 5 3 -4 14.45 0.37
 5 -3 4 13.72 0.39
 -5 3 4 13.95 0.4
 5 3 5 2.69 0.1
 -5 -3 5 2.73 0.11
 -5 3 -5 2.77 0.11
 -5 -3 5 2.78 0.11
 5 -3 -5 2.71 0.1
 5 3 -5 2.92 0.1
 -5 -3 -5 2.62 0.11
 -5 3 5 2.93 0.11
 5 -3 5 2.63 0.1
 -5 3 5 2.83 0.11
 5 -3 -6 3.65 0.13
 -5 3 -6 3.44 0.14
 5 3 6 3.65 0.13
 -5 -3 6 3.47 0.14
 -5 -3 6 3.26 0.13
 -5 -3 -6 3.3 0.13
 5 3 -6 3.55 0.12
 -5 3 6 3.61 0.13
 5 -3 6 3.36 0.14
 -5 3 6 3.44 0.14
 5 -3 6 3.42 0.13
 5 3 7 0.46 0.05
 -5 -3 7 0.46 0.06
 -5 -3 7 0.43 0.05
 -5 3 -7 0.49 0.06
 5 -3 -7 0.48 0.05
 5 3 -7 0.46 0.05
 -5 -3 -7 0.47 0.06
 -5 3 7 0.48 0.05
 5 -3 7 0.46 0.06
 5 -3 -8 0.14 0.04
 5 3 8 0.12 0.04
 -5 -3 8 0.18 0.05
 -5 3 -8 0.2 0.05
 -5 -3 8 0.1 0.04
 -5 -3 -8 0.18 0.05
 5 -3 8 0.2 0.05
 -5 3 8 0.15 0.05
 5 3 -8 0.22 0.05
 -5 3 -9 0.26 0.06
 -5 -3 9 0.12 0.06
 -5 3 9 0.17 0.06
 -5 -3 -9 0.09 0.05
 5 -3 9 0.24 0.06
 -5 -4 0 0.12 0.02
 5 4 0 0.13 0.02
 -5 -4 0 0.15 0.01
 -5 -4 0 0.16 0.02
 -5 4 0 0.14 0.02
 5 -4 0 0.17 0.02
 5 -4 0 0.18 0.02
 -5 -4 1 11.99 0.34
 -5 -4 1 12.18 0.34
 5 -4 -1 11.43 0.34
 5 -4 -1 11.74 0.34
 5 -4 1 12.28 0.34
 -5 -4 -1 12.08 0.33
 5 -4 1 12.25 0.34
 -5 -4 -1 11.79 0.32
 5 4 -1 11.74 0.32
 5 -4 -2 9.45 0.26
 -5 -4 2 10.12 0.28
 5 -4 -2 9.75 0.29
 -5 4 -2 10 0.27
 5 -4 -2 9.65 0.28
 5 4 -2 9.84 0.26
 -5 -4 -2 10.01 0.27
 5 -4 2 9.51 0.29
 5 -4 2 9.67 0.29
 -5 -4 -2 9.61 0.27
 -5 -4 3 2.21 0.09
 5 -4 -3 2.27 0.08
 5 -4 -3 2.34 0.09
 -5 -4 3 2.07 0.08
 5 4 3 2.15 0.07
 5 -4 -3 2.16 0.08
 -5 4 -3 2.2 0.09
 5 -4 3 2.33 0.09
 5 4 -3 2.2 0.08
 -5 -4 -3 2.15 0.08
 5 -4 3 2.06 0.09
 5 4 4 1.8 0.07
 -5 -4 4 1.84 0.09
 5 -4 -4 1.96 0.08
 5 -4 -4 1.9 0.08
 -5 4 -4 1.8 0.08
 -5 -4 4 1.86 0.08
 5 -4 -4 1.89 0.08
 -5 -4 -4 1.95 0.08
 5 -4 4 1.92 0.08
 5 4 -4 1.9 0.07
 -5 -4 5 0.75 0.06
 -5 -4 5 0.61 0.05
 5 -4 -5 0.58 0.04
 -5 4 -5 0.59 0.05
 5 -4 -5 0.59 0.05
 5 -4 -5 0.63 0.05
 5 4 5 0.6 0.04
 5 -4 5 0.53 0.04
 5 4 -5 0.61 0.04
 -5 4 5 0.6 0.05
 5 -4 5 0.57 0.05
 -5 -4 -5 0.6 0.05
 -5 4 5 0.54 0.04
 -5 4 -6 6.12 0.22
 -5 -4 6 6.79 0.23
 5 -4 -6 6.93 0.21
 -5 -4 6 6.68 0.23
 5 4 6 7.13 0.22
 -5 4 6 6.97 0.23
 -5 4 6 6.61 0.21
 5 4 -6 6.75 0.21
 5 -4 6 6.6 0.23
 -5 -4 -6 6.28 0.22
 5 -4 6 6.78 0.22
 -5 4 -7 0.6 0.06
 5 -4 -7 0.61 0.06
 5 4 7 0.48 0.05
 -5 -4 7 0.52 0.06
 -5 -4 7 0.57 0.06
 5 -4 7 0.59 0.05
 5 4 -7 0.6 0.05
 -5 4 7 0.65 0.06
 -5 -4 -7 0.59 0.06
 5 -4 7 0.51 0.06
 -5 -4 8 0.53 0.06
 5 -4 -8 0.42 0.05
 -5 4 -8 0.53 0.07
 -5 -4 8 0.47 0.07
 5 4 -8 0.5 0.06
 -5 -4 -8 0.62 0.07
 -5 4 8 0.52 0.06
 5 -4 8 0.64 0.07
 -5 -4 9 0.81 0.08
 -5 4 -9 0.73 0.08
 -5 -4 -9 0.84 0.08
 -5 4 9 0.73 0.07
 5 -4 9 0.93 0.09
 -5 -5 0 73.31 1.94
 5 -5 0 72.95 1.95
 -5 5 0 70.44 1.83
 -5 -5 0 71.54 1.96
 5 5 0 73.94 1.83
 5 -5 0 73.22 1.97
 5 -5 -1 34.13 0.96
 -5 -5 1 34.29 0.95
 -5 -5 1 35.5 0.95
 5 -5 -1 34.98 0.96
 -5 5 -1 34.14 0.9
 -5 -5 -1 35.45 0.9
 5 -5 1 34.41 0.96
 5 -5 1 35.26 0.96
 -5 5 1 36.05 0.9
 5 5 -1 35.33 0.9
 -5 -5 -1 35.24 0.94
 5 -5 -2 14.45 0.41
 5 -5 -2 14 0.41
 5 -5 -2 13.9 0.38
 -5 -5 2 14.48 0.41
 -5 -5 2 14.51 0.41
 5 -5 2 13.81 0.41
 -5 5 2 14.19 0.38
 5 5 -2 14.56 0.38
 5 -5 2 14.11 0.41
 -5 -5 -2 14.76 0.39
 -5 -5 -2 14.02 0.39
 -5 5 -3 7.22 0.22
 5 -5 -3 7.21 0.21
 -5 -5 3 7.22 0.23
 5 -5 -3 7.05 0.22
 -5 -5 3 7.33 0.23
 5 -5 -3 7.24 0.22
 5 5 3 7.32 0.21
 5 -5 3 7.22 0.23
 -5 -5 -3 7.25 0.22
 5 -5 3 7.36 0.23
 5 5 -3 7.36 0.21
 -5 -5 -3 7.4 0.2
 -5 -5 4 15.36 0.46
 5 -5 -4 15.84 0.45
 5 -5 -4 15.04 0.42
 -5 5 -4 15.5 0.43
 5 5 4 15.86 0.44
 5 -5 -4 15.75 0.46
 -5 -5 4 15.72 0.46
 5 5 -4 15.96 0.42
 5 -5 4 15.57 0.46
 -5 -5 -4 15.65 0.43
 5 -5 4 15.74 0.45
 5 -5 -5 1.01 0.06
 5 -5 -5 1.18 0.06
 5 -5 -5 1.16 0.07
 -5 -5 5 1 0.07
 -5 5 -5 1.13 0.07
 -5 -5 5 1.1 0.07
 5 5 -5 1.07 0.06
 -5 5 5 1.15 0.06
 -5 5 5 1.17 0.06
 5 -5 5 1.1 0.06
 5 -5 5 1.11 0.07
 -5 -5 6 0.55 0.06
 -5 5 -6 0.54 0.06
 -5 -5 6 0.49 0.05
 5 -5 -6 0.51 0.05
 5 -5 6 0.49 0.05
 -5 5 6 0.49 0.05
 -5 -5 -6 0.48 0.05
 5 -5 6 0.55 0.06
 -5 5 6 0.55 0.05
 5 5 -6 0.54 0.05
 -5 -5 7 2.4 0.12
 -5 5 -7 2.43 0.12
 5 -5 -7 2.29 0.1
 -5 -5 7 2.45 0.12
 5 -5 7 2.23 0.11
 -5 -5 -7 2.28 0.11
 5 -5 7 2.35 0.12
 5 5 -7 2.26 0.1
 -5 5 7 2.36 0.11
 -5 -5 8 1.31 0.09
 5 -5 -8 1.29 0.08
 -5 5 -8 1.35 0.09
 -5 -5 8 1.19 0.09
 5 -5 8 1.4 0.1
 -5 5 8 1.27 0.08
 -5 -5 -8 1.3 0.09
 -5 -5 9 1.91 0.11
 -5 -5 9 1.8 0.12
 -5 5 -9 1.87 0.11
 -5 -5 -9 1.69 0.11
 5 -5 9 2.07 0.12
 5 -6 0 20.36 0.59
 -5 -6 0 20.7 0.57
 -5 6 0 21.17 0.55
 5 6 0 21.42 0.55
 -5 -6 0 20.94 0.58
 5 -6 0 20.8 0.58
 -5 -6 1 3.81 0.13
 -5 6 -1 3.59 0.12
 5 -6 -1 3.61 0.13
 5 -6 -1 3.81 0.12
 -5 -6 1 3.7 0.11
 -5 -6 -1 3.78 0.12
 -5 -6 -1 3.8 0.12
 5 6 -1 3.79 0.12
 5 -6 1 3.75 0.13
 5 -6 1 3.57 0.13
 -5 6 1 3.71 0.12
 -5 -6 2 12.37 0.35
 5 -6 -2 12.29 0.36
 5 -6 -2 11.99 0.36
 -5 6 -2 11.78 0.34
 5 -6 2 12.27 0.36
 -5 -6 -2 12.08 0.34
 5 6 -2 12.05 0.34
 -5 6 2 12.84 0.34
 5 -6 2 12.53 0.36
 -5 -6 -2 12.45 0.34
 -5 -6 3 4.68 0.17
 5 -6 -3 5 0.16
 5 -6 -3 4.75 0.15
 5 -6 -3 4.96 0.16
 -5 -6 3 4.74 0.16
 -5 -6 -3 4.6 0.16
 5 -6 3 4.57 0.16
 5 6 -3 4.82 0.15
 5 -6 3 4.71 0.16
 5 -6 -4 7.45 0.22
 -5 6 -4 7.14 0.22
 5 -6 -4 7.2 0.21
 -5 -6 4 6.44 0.23
 5 -6 -4 7.12 0.22
 -5 -6 4 6.8 0.23
 -5 -6 -4 7.04 0.22
 5 -6 4 6.58 0.23
 5 6 -4 7.13 0.21
 5 -6 4 6.58 0.23
 -5 6 -5 0.56 0.06
 5 -6 -5 0.69 0.05
 -5 -6 5 0.57 0.05
 5 -6 -5 0.58 0.05
 5 -6 -5 0.57 0.05
 -5 -6 5 0.57 0.05
 -5 6 5 0.63 0.05
 -5 6 5 0.62 0.05
 5 6 -5 0.61 0.05
 -5 -6 -5 0.61 0.05
 5 -6 5 0.62 0.05
 5 -6 5 0.63 0.06
 -5 6 -6 10.2 0.32
 5 -6 -6 10.29 0.3
 -5 -6 6 10.13 0.33
 -5 -6 6 10.16 0.33
 -5 -6 -6 10.28 0.31
 5 6 -6 10.27 0.3
 -5 6 6 9.82 0.32
 5 -6 6 10.01 0.32
 5 -6 6 10.29 0.34
 -5 -6 7 4.28 0.18
 -5 6 -7 4.37 0.17
 5 -6 -7 4.12 0.16
 -5 -6 7 4.32 0.17
 -5 6 7 4.11 0.16
 5 6 -7 3.85 0.15
 5 -6 7 4.32 0.18
 -5 -6 -7 4.49 0.17
 5 -6 7 4.03 0.16
 5 -6 -8 0.99 0.08
 -5 -6 8 1.19 0.09
 -5 6 -8 1.13 0.09
 -5 -6 8 1.09 0.09
 -5 -6 -8 1.18 0.09
 5 -6 8 1.3 0.09
 -5 -6 9 0.29 0.07
 -5 -6 9 0.32 0.06
 -5 6 -9 0.35 0.07
 5 -6 9 0.44 0.07
 -5 -6 -9 0.36 0.06
 -5 7 0 23.41 0.62
 5 7 0 22.81 0.61
 -5 -7 0 23.01 0.64
 5 -7 0 22.87 0.65
 5 -7 0 23.55 0.65
 5 -7 -1 1.14 0.06
 -5 -7 1 1.19 0.05
 5 -7 -1 1.31 0.06
 -5 7 -1 1.21 0.06
 -5 -7 1 1.13 0.06
 5 7 1 1.15 0.06
 5 -7 1 1.1 0.06
 5 -7 1 1.2 0.06
 -5 -7 -1 1.27 0.06
 -5 -7 -1 1.23 0.06
 -5 7 1 1.12 0.06
 5 7 -1 1.18 0.06
 -5 -7 2 4.2 0.16
 -5 7 -2 4.27 0.15
 5 -7 -2 4.3 0.15
 5 -7 -2 4.42 0.15
 -5 -7 2 4.74 0.14
 5 -7 2 4.13 0.16
 5 -7 2 4.35 0.15
 5 7 -2 4.42 0.14
 -5 -7 -2 4.66 0.14
 -5 -7 -2 4.29 0.15
 -5 7 2 4.57 0.15
 5 -7 -3 3.91 0.14
 5 -7 -3 3.97 0.14
 -5 7 -3 3.79 0.14
 -5 -7 3 4.12 0.14
 5 -7 -3 4.02 0.13
 -5 -7 3 3.78 0.15
 -5 -7 -3 3.73 0.14
 5 -7 3 3.71 0.14
 -5 7 3 3.87 0.14
 5 7 -3 3.8 0.13
 5 -7 3 3.79 0.15
 5 -7 -4 3.06 0.12
 -5 7 -4 2.89 0.12
 -5 -7 4 3 0.12
 -5 -7 4 2.94 0.13
 5 -7 -4 3.13 0.12
 5 -7 -4 3.18 0.12
 -5 -7 -4 2.96 0.12
 5 -7 4 3.02 0.13
 5 7 -4 3.07 0.11
 5 -7 4 3.04 0.13
 -5 -7 5 4.59 0.18
 5 -7 -5 4.74 0.16
 -5 7 -5 4.62 0.17
 5 -7 -5 4.79 0.17
 -5 -7 5 4.58 0.17
 5 -7 -5 4.72 0.16
 5 7 -5 4.79 0.16
 5 -7 5 4.74 0.18
 -5 -7 -5 4.53 0.17
 -5 7 5 4.75 0.16
 5 -7 5 4.81 0.18
 -5 -7 6 0.07 0.04
 -5 -7 6 0.02 0.01
 5 -7 -6 0.05 0.03
 -5 7 -6 0.07 0.04
 5 -7 6 0.07 0.04
 5 -7 6 0.08 0.04
 -5 -7 -6 0.03 0.02
 5 7 -6 0.02 0.01
 -5 -7 7 4.9 0.19
 5 -7 -7 4.49 0.17
 -5 7 -7 4.72 0.19
 -5 -7 7 4.96 0.19
 5 -7 7 4.72 0.19
 5 -7 7 4.7 0.18
 5 7 -7 4.42 0.17
 -5 -7 -7 4.77 0.18
 -5 -7 8 0.28 0.06
 -5 7 -8 0.25 0.06
 -5 -7 8 0.13 0.06
 5 -7 -8 0.3 0.05
 5 -7 8 0.18 0.06
 -5 -7 -8 0.25 0.05
 -5 -8 0 9.04 0.28
 5 -8 0 9.78 0.28
 -5 8 0 9.28 0.27
 5 -8 0 8.72 0.29
 5 8 0 9.23 0.27
 5 -8 -1 0.1 0.02
 -5 8 -1 0.09 0.03
 5 8 1 0.09 0.03
 -5 -8 1 0.1 0.03
 5 -8 -1 0.11 0.03
 5 8 -1 0.07 0.03
 -5 -8 -1 0.11 0.03
 5 -8 1 0.07 0.03
 -5 8 1 0.26 0.04
 5 -8 1 0.15 0.03
 5 -8 -2 18.97 0.56
 -5 -8 2 18.96 0.56
 -5 8 -2 18.74 0.53
 5 -8 -2 20.21 0.55
 -5 -8 2 20.37 0.55
 5 8 -2 18.97 0.53
 -5 8 2 19.82 0.53
 5 -8 2 19.65 0.56
 5 -8 2 18.54 0.57
 -5 -8 -2 19.54 0.53
 -5 -8 -2 20.6 0.55
 -5 8 -3 1.8 0.09
 5 -8 -3 1.77 0.08
 -5 -8 3 1.79 0.09
 -5 -8 3 2 0.08
 5 -8 -3 2 0.09
 5 8 -3 1.89 0.09
 5 -8 3 1.93 0.1
 5 -8 3 1.9 0.09
 -5 -8 -3 1.81 0.09
 -5 8 3 1.93 0.09
 -5 -8 4 5.03 0.19
 -5 8 -4 5.16 0.18
 5 -8 -4 5.24 0.18
 -5 -8 4 5.45 0.18
 5 -8 -4 5.02 0.18
 5 -8 4 5.37 0.19
 -5 8 4 5.06 0.18
 5 -8 4 5.12 0.19
 5 8 -4 5.18 0.18
 -5 -8 -4 5.27 0.18
 -5 -8 5 0.83 0.06
 -5 8 -5 0.91 0.07
 5 -8 -5 0.8 0.06
 -5 -8 5 0.78 0.07
 5 -8 5 0.84 0.07
 5 -8 5 0.91 0.07
 -5 -8 -5 0.8 0.06
 5 8 -5 0.8 0.06
 5 -8 -6 0.33 0.05
 -5 8 -6 0.35 0.06
 -5 -8 6 0.3 0.05
 -5 -8 6 0.35 0.05
 -5 -8 -6 0.32 0.06
 5 -8 6 0.36 0.06
 5 8 -6 0.28 0.05
 5 -8 6 0.4 0.06
 5 -8 -7 0.02 0.02
 -5 -8 7 0.01 0.02
 -5 8 -7 0.01 0.02
 -5 -8 7 -0.01 0.01
 -5 -8 -7 0.01 0.01
 5 8 -7 0 0.01
 5 -8 7 0.02 0.02
 5 -8 7 0 0.02
 -5 -8 8 4.48 0.19
 -5 -8 8 4.49 0.19
 5 -8 -8 4.33 0.17
 -5 8 -8 4.35 0.19
 -5 -8 -8 4.4 0.18
 5 -8 8 4.22 0.18
 5 -8 8 4.14 0.19
 -5 9 0 4.09 0.15
 5 9 0 3.96 0.15
 -5 -9 0 4.15 0.15
 5 -9 0 4.08 0.16
 5 -9 0 4.11 0.14
 5 -9 -1 6.78 0.23
 -5 -9 1 7.02 0.23
 5 -9 -1 7.23 0.21
 5 9 1 6.61 0.22
 -5 9 -1 6.52 0.22
 -5 -9 -1 7 0.22
 5 9 -1 6.67 0.22
 5 -9 1 6.78 0.23
 5 -9 1 6.79 0.22
 -5 9 1 6.7 0.22
 5 9 2 27.43 0.77
 5 -9 -2 29.55 0.81
 -5 -9 2 28.35 0.82
 -5 9 -2 29.07 0.78
 -5 -9 -2 30.06 0.77
 5 9 -2 29.14 0.77
 5 -9 2 26.5 0.82
 -5 -9 -2 30.43 0.8
 -5 9 2 28.95 0.77
 5 -9 2 29.11 0.82
 5 -9 -3 4.5 0.16
 -5 9 -3 4.32 0.16
 -5 -9 3 4.25 0.17
 5 -9 3 4.36 0.17
 5 9 -3 4.26 0.15
 5 -9 3 4.31 0.16
 -5 9 3 4.29 0.16
 -5 -9 -3 4.17 0.16
 5 -9 -4 20.19 0.55
 -5 -9 4 19.61 0.59
 -5 9 -4 19.56 0.56
 -5 -9 4 19.71 0.57
 5 -9 -4 19.57 0.57
 -5 9 4 19.74 0.55
 -5 -9 -4 20.07 0.55
 5 9 -4 19.22 0.54
 5 -9 4 19.81 0.59
 5 -9 4 19.45 0.58
 -5 -9 5 1.53 0.09
 -5 9 -5 1.57 0.09
 5 -9 -5 1.71 0.09
 -5 -9 5 1.74 0.1
 5 -9 5 1.8 0.1
 -5 9 5 1.68 0.09
 5 9 -5 1.6 0.09
 -5 -9 -5 1.75 0.1
 5 -9 5 1.79 0.1
 -5 -9 6 3.63 0.16
 5 -9 -6 3.56 0.15
 -5 9 -6 3.9 0.16
 -5 -9 6 4.08 0.17
 5 9 -6 3.48 0.15
 5 -9 6 3.73 0.16
 -5 -9 -6 3.82 0.16
 5 -9 6 3.83 0.16
 -5 9 -7 2.65 0.13
 -5 -9 7 2.46 0.13
 -5 -9 7 2.41 0.13
 5 -9 -7 2.62 0.12
 -5 -9 -7 2.59 0.13
 5 -9 7 2.64 0.14
 5 -9 7 2.5 0.13
 5 9 -7 2.47 0.13
 -5 -9 8 2.53 0.13
 5 -9 -8 2.67 0.13
 -5 -9 8 2.5 0.14
 -5 9 -8 2.42 0.13
 -5 -9 -8 2.52 0.13
 5 -9 8 2.62 0.14
 5 -9 8 2.31 0.13
 5 -10 0 6.82 0.24
 5 10 0 6.7 0.22
 -5 10 0 7.32 0.23
 -5 -10 0 6.98 0.23
 -5 10 -1 1.29 0.08
 5 10 1 1.3 0.08
 -5 -10 1 1.28 0.08
 5 -10 -1 1.33 0.08
 -5 -10 -1 1.29 0.07
 5 -10 1 1.27 0.07
 5 -10 1 1.22 0.08
 5 10 -1 1.33 0.08
 -5 10 1 1.3 0.08
 -5 -10 2 16.84 0.51
 -5 10 -2 16.91 0.48
 5 10 2 16.54 0.48
 5 -10 -2 16.3 0.5
 5 -10 2 17.09 0.49
 -5 10 2 17.25 0.48
 5 10 -2 17.01 0.48
 5 -10 2 16.97 0.51
 -5 10 -3 5.19 0.19
 5 -10 -3 5.42 0.19
 5 10 3 5.47 0.19
 -5 -10 3 5.53 0.2
 5 10 -3 5.43 0.19
 5 -10 3 5.21 0.19
 -5 10 3 5.45 0.19
 -5 -10 -3 5.56 0.19
 5 -10 3 5.4 0.2
 -5 -10 4 4.45 0.18
 -5 10 -4 4.12 0.17
 5 10 -4 4.18 0.16
 5 -10 4 4.55 0.18
 -5 10 4 4.21 0.16
 -5 -10 -4 4.44 0.17
 5 -10 4 4.15 0.17
 -5 -10 5 0.95 0.08
 -5 10 -5 0.95 0.08
 5 -10 -5 0.82 0.07
 5 -10 5 0.82 0.07
 5 -10 5 1.01 0.08
 5 10 -5 0.83 0.07
 -5 10 5 0.91 0.07
 -5 -10 -5 0.74 0.07
 -5 10 -6 2.3 0.12
 -5 -10 6 2.17 0.13
 5 -10 -6 2.16 0.11
 -5 -10 -6 2.38 0.12
 -5 10 6 2.21 0.11
 5 -10 6 2.13 0.12
 5 10 -6 2.16 0.11
 5 -10 6 2.12 0.12
 5 -10 -7 0.95 0.08
 -5 10 -7 0.87 0.08
 -5 -10 7 0.79 0.07
 -5 -10 7 0.76 0.08
 5 -10 7 0.77 0.08
 5 -10 7 0.93 0.08
 -5 -10 -7 0.79 0.08
 -5 -11 0 0.11 0.04
 5 11 0 0.06 0.04
 -5 11 0 0.1 0.04
 5 -11 0 0.06 0.04
 -5 -11 1 1.45 0.09
 5 -11 -1 1.48 0.09
 -5 11 -1 1.34 0.09
 5 11 1 1.36 0.08
 -5 11 1 1.46 0.09
 -5 -11 -1 1.44 0.08
 5 -11 1 1.47 0.09
 5 11 -1 1.35 0.08
 -5 11 -2 3.38 0.14
 5 11 2 3.36 0.14
 -5 -11 2 3.38 0.15
 5 -11 -2 3.2 0.14
 5 11 -2 3.56 0.14
 5 -11 2 3.32 0.15
 -5 11 2 3.42 0.14
 -5 11 -3 0.44 0.06
 5 11 3 0.47 0.06
 5 -11 -3 0.39 0.05
 -5 -11 3 0.51 0.06
 5 -11 3 0.56 0.06
 5 11 -3 0.46 0.05
 -5 11 3 0.44 0.06
 5 11 4 2.05 0.11
 -5 11 -4 2.21 0.12
 -5 -11 4 2.13 0.12
 5 -11 4 2.37 0.12
 -5 11 4 2.09 0.11
 5 11 -4 2.09 0.11
 5 -11 4 1.95 0.1
 -5 -11 -4 2.27 0.12
 -5 11 -5 0.49 0.07
 -5 -11 5 0.33 0.06
 5 -11 5 0.43 0.06
 5 -11 5 0.26 0.05
 -5 -11 -5 0.37 0.06
 5 11 -5 0.37 0.06
 -5 11 5 0.37 0.06
 -5 -11 6 1.02 0.09
 -5 11 -6 1.03 0.09
 5 -11 -6 1.05 0.08
 5 -11 6 1.15 0.09
 -5 11 6 0.93 0.08
 5 -11 6 0.79 0.08
 -5 -11 -6 1.18 0.09
 5 11 -6 1.04 0.08
 -5 -12 0 0.01 0.01
 -5 12 0 0.01 0.02
 5 -12 0 -0.02 0.01
 5 12 0 0 0.01
 5 -12 -1 3.89 0.16
 -5 12 -1 3.96 0.16
 5 12 1 3.97 0.16
 -5 -12 1 3.8 0.16
 5 -12 1 4.07 0.17
 -5 12 1 3.99 0.16
 5 12 -1 3.87 0.16
 -5 12 -2 3.27 0.14
 5 -12 -2 3.1 0.14
 5 12 2 3.22 0.14
 -5 -12 2 3.04 0.14
 5 -12 2 3.05 0.15
 5 12 -2 3.36 0.14
 -5 12 2 3.2 0.14
 -5 12 -3 4.92 0.19
 -5 -12 3 4.72 0.19
 5 12 3 4.84 0.19
 5 -12 -3 4.18 0.18
 5 -12 3 4.73 0.19
 -5 12 3 4.85 0.18
 5 12 -3 4.78 0.18
 5 12 4 5.02 0.2
 -5 12 -4 5.16 0.2
 -5 -12 4 5.14 0.21
 -5 12 4 5.2 0.2
 5 -12 4 5.45 0.21
 5 12 -4 5.05 0.19
 5 12 5 2.6 0.13
 -5 12 -5 2.32 0.13
 -5 -12 5 2.43 0.14
 5 12 -5 2.44 0.12
 -5 -12 -5 2.52 0.13
 -5 12 5 2.72 0.13
 5 -12 5 2.53 0.13
 -5 12 -6 2.24 0.13
 5 12 6 2.45 0.13
 -5 12 6 2.36 0.12
 5 -12 6 2.18 0.13
 5 12 -6 2.2 0.12
 -5 -12 -6 2.24 0.13
 -5 13 0 6.19 0.22
 5 13 0 6.11 0.22
 -5 -13 0 5.69 0.21
 5 -13 0 5.85 0.22
 -5 -13 1 1.69 0.1
 5 13 1 1.72 0.1
 -5 13 -1 1.84 0.11
 5 -13 -1 1.77 0.1
 -5 13 1 1.91 0.11
 5 -13 1 1.87 0.11
 5 13 -1 1.78 0.1
 -5 -13 2 6.14 0.23
 5 -13 -2 5.61 0.22
 5 13 2 5.82 0.22
 -5 13 -2 5.95 0.22
 5 13 -2 5.71 0.21
 5 -13 2 5.82 0.23
 -5 13 2 6.16 0.22
 -5 13 -3 0.65 0.07
 5 13 3 0.75 0.08
 -5 -13 3 0.62 0.07
 -5 13 3 0.63 0.07
 5 13 -3 0.66 0.07
 5 -13 3 0.52 0.07
 -5 -13 4 1.44 0.11
 -5 13 -4 1.63 0.11
 5 13 4 1.54 0.1
 -5 13 4 1.68 0.1
 5 13 -4 1.62 0.1
 5 -13 4 1.62 0.11
 -5 13 -5 3.21 0.16
 5 13 5 3.21 0.15
 -5 13 5 3.31 0.15
 5 13 -5 3.41 0.15
 5 14 0 1.53 0.1
 -5 14 0 1.4 0.1
 5 -14 0 1.38 0.1
 -5 14 -1 1.67 0.11
 -5 -14 1 1.57 0.1
 5 14 1 1.74 0.11
 5 -14 -1 1.63 0.1
 5 14 -1 1.89 0.11
 5 -14 1 1.86 0.11
 -5 14 1 1.79 0.11
 5 14 2 0.7 0.08
 -5 -14 2 0.64 0.07
 -5 14 -2 0.74 0.08
 5 -14 -2 0.76 0.07
 5 -14 2 0.68 0.08
 -5 14 2 0.72 0.08
 5 14 -2 0.82 0.08
 -5 -14 3 1.88 0.12
 5 14 3 1.88 0.12
 -5 14 -3 1.85 0.12
 -5 14 3 2.07 0.12
 5 -14 3 2.01 0.12
 5 14 -3 1.76 0.11
 5 -15 0 0.01 0.02
 -5 15 0 0.02 0.02
 5 15 0 0.01 0.02
 5 15 1 0.65 0.08
 -5 15 -1 0.75 0.08
 5 -15 -1 0.48 0.07
 -5 -15 1 0.63 0.07
 -5 15 1 0.69 0.08
 5 15 -1 0.59 0.07
 5 -15 1 0.61 0.07
 -6 0 0 110.68 2.95
 6 0 0 128.12 3.2
 6 0 0 113.77 3.15
 -6 0 1 15.83 0.43
 -6 0 -1 15.18 0.4
 6 0 -1 15.5 0.43
 6 0 -1 15.24 0.43
 6 0 1 15.71 0.43
 6 0 1 15.03 0.42
 6 0 -2 35.77 1.01
 6 0 -2 36.05 0.92
 6 0 -2 35.39 0.99
 -6 0 -2 37.17 0.93
 6 0 2 37.7 1.01
 -6 0 2 36.45 0.99
 6 0 2 38.24 0.98
 -6 0 3 14.2 0.41
 6 0 -3 15.42 0.42
 6 0 3 14.76 0.42
 6 0 -3 14.83 0.38
 -6 0 -3 14.49 0.39
 6 0 3 14.1 0.4
 6 0 4 106.02 3.01
 -6 0 -4 111.99 2.86
 6 0 4 112.84 3.08
 -6 0 4 116.77 3.08
 -6 0 4 115.65 3.03
 6 0 -4 112.25 3.08
 6 0 -4 117.74 2.84
 -6 0 5 15.39 0.46
 -6 0 5 15.72 0.45
 -6 0 -5 15.02 0.43
 6 0 5 15.38 0.43
 6 0 5 15.37 0.46
 6 0 -5 16.12 0.42
 -6 0 6 4.02 0.15
 6 0 -6 4.05 0.13
 6 0 6 3.92 0.15
 -6 0 6 3.85 0.14
 -6 0 -6 3.75 0.15
 -6 0 7 1.85 0.1
 6 0 7 1.79 0.1
 6 0 -7 1.82 0.08
 -6 0 7 1.76 0.09
 -6 0 -7 1.85 0.1
 -6 0 8 1.72 0.1
 -6 0 8 1.48 0.09
 6 0 8 1.73 0.1
 -6 0 -8 1.79 0.1
 -6 0 9 2.28 0.13
 6 0 9 2.23 0.12
 -6 0 -9 2.01 0.12
 -6 0 -10 0.56 0.08
 6 0 10 0.67 0.08
 -6 0 10 0.47 0.08
 -6 1 0 69.37 1.71
 6 -1 0 66.12 1.81
 -6 -1 0 69.61 1.81
 6 1 0 69.38 1.81
 -6 -1 0 66.69 1.71
 6 1 0 68.9 1.83
 6 -1 0 64.95 1.84
 6 1 1 1.09 0.04
 -6 1 -1 0.94 0.04
 6 1 1 1.08 0.04
 6 -1 -1 1.03 0.04
 -6 -1 -1 1.04 0.04
 -6 -1 -1 0.97 0.04
 6 -1 1 1.11 0.04
 -6 1 1 1.16 0.03
 6 -1 1 1.13 0.04
 6 1 -1 0.9 0.04
 6 1 2 44.95 1.19
 6 -1 -2 43.49 1.23
 6 1 2 45.22 1.22
 -6 1 -2 44.97 1.14
 6 -1 -2 43.76 1.13
 -6 -1 2 45.91 1.21
 6 -1 -2 43.37 1.21
 -6 1 2 45.52 1.21
 6 1 -2 45.62 1.13
 6 -1 2 46.59 1.2
 -6 -1 -2 43.72 1.14
 6 -1 2 45.71 1.23
 6 1 -2 45.62 1.23
 6 1 3 19.15 0.52
 -6 1 -3 19.26 0.51
 6 -1 -3 20.01 0.5
 -6 -1 3 18.97 0.55
 6 1 3 20.14 0.55
 6 -1 -3 18.84 0.54
 -6 -1 3 18.75 0.54
 -6 1 3 19.79 0.54
 6 1 -3 20.21 0.55
 6 1 -3 19.71 0.5
 -6 -1 -3 19.36 0.51
 6 -1 3 19.21 0.55
 6 -1 3 19.6 0.53
 -6 1 -4 1.17 0.06
 6 -1 -4 1.03 0.05
 6 -1 -4 1.07 0.06
 6 1 4 1.04 0.05
 -6 -1 4 0.95 0.05
 6 -1 4 1.07 0.04
 6 1 -4 1.06 0.05
 6 -1 4 0.96 0.06
 -6 -1 -4 1.03 0.06
 -6 1 4 1.04 0.05
 -6 -1 5 1.98 0.09
 6 1 5 1.94 0.09
 -6 1 -5 1.88 0.09
 -6 -1 5 2.15 0.09
 6 -1 -5 1.97 0.08
 -6 -1 -5 1.93 0.09
 -6 1 5 2.08 0.09
 -6 1 5 1.92 0.09
 6 -1 5 2 0.07
 6 1 -5 1.97 0.08
 -6 -1 6 6.87 0.23
 6 1 6 6.92 0.23
 -6 1 -6 6.9 0.22
 6 -1 -6 7.26 0.21
 -6 1 6 6.67 0.22
 6 -1 6 7.05 0.24
 6 1 -6 7.02 0.21
 -6 -1 -6 6.91 0.22
 -6 1 6 6.7 0.23
 -6 -1 7 5.36 0.19
 -6 1 -7 5.18 0.19
 6 1 7 5.16 0.19
 6 -1 -7 4.96 0.17
 -6 -1 7 5.33 0.2
 -6 1 7 5.22 0.18
 -6 1 7 5.05 0.19
 -6 -1 -7 4.9 0.18
 6 -1 7 5.23 0.19
 6 1 -7 5.12 0.17
 6 1 8 0 0.01
 -6 -1 8 0.01 0.01
 -6 -1 8 0.01 0.02
 6 -1 -8 0 0.01
 -6 1 -8 0.01 0.02
 -6 -1 -8 0.02 0.02
 -6 1 8 0 0.01
 6 -1 8 0.07 0.05
 -6 -1 9 0.16 0.06
 -6 1 -9 0.17 0.05
 6 1 9 0.14 0.05
 -6 -1 -9 0.15 0.06
 -6 1 9 0.21 0.06
 6 -1 9 0.17 0.06
 -6 -1 10 3.53 0.17
 -6 1 -10 3.4 0.16
 6 1 10 3.66 0.16
 -6 -1 -10 3.42 0.16
 6 -1 10 3.39 0.17
 -6 1 10 3.3 0.17
 6 -2 0 2.6 0.09
 6 2 0 2.54 0.08
 -6 -2 0 2.53 0.08
 -6 -2 0 2.52 0.07
 -6 2 0 2.66 0.08
 6 -2 0 2.64 0.09
 -6 2 -1 1.22 0.05
 6 2 1 1.25 0.04
 6 -2 -1 1.14 0.05
 -6 -2 1 1.27 0.05
 -6 2 1 1.2 0.04
 6 -2 1 1.22 0.05
 6 2 -1 1.14 0.05
 6 2 -1 1.17 0.04
 -6 -2 -1 1.2 0.04
 6 -2 1 1.27 0.05
 -6 -2 -1 1.13 0.04
 6 -2 -2 6.97 0.21
 6 -2 -2 6.59 0.21
 -6 -2 2 6.88 0.21
 6 -2 -2 7.02 0.19
 6 2 2 7.15 0.2
 -6 -2 -2 7.14 0.2
 6 -2 2 7.01 0.2
 6 -2 2 6.94 0.21
 6 2 -2 7.22 0.21
 6 2 -2 6.97 0.18
 -6 -2 3 6.04 0.19
 6 -2 -3 6.32 0.2
 6 -2 -3 6.43 0.19
 6 2 3 6.44 0.19
 6 -2 -3 6.32 0.17
 -6 -2 3 6.09 0.19
 -6 2 -3 6.47 0.19
 6 2 -3 6.16 0.17
 -6 2 3 6.04 0.19
 6 -2 3 6.08 0.2
 -6 -2 -3 6.22 0.18
 6 -2 3 6.31 0.19
 6 -2 -4 6.43 0.21
 -6 -2 4 6.37 0.21
 6 2 4 6.8 0.2
 6 -2 -4 6.79 0.19
 6 -2 -4 6.65 0.21
 -6 -2 4 6.41 0.21
 -6 2 -4 6.4 0.2
 6 -2 4 6.68 0.21
 -6 -2 -4 6.6 0.2
 6 2 -4 6.69 0.19
 -6 2 4 6.89 0.21
 6 -2 4 6.67 0.2
 -6 2 -5 4.51 0.16
 6 2 5 4.75 0.16
 -6 -2 5 4.83 0.17
 6 -2 -5 4.57 0.17
 6 -2 -5 5.01 0.15
 -6 -2 5 4.62 0.17
 -6 2 5 4.6 0.16
 -6 2 5 4.81 0.17
 6 -2 5 4.79 0.15
 6 -2 5 4.75 0.17
 -6 -2 -5 4.69 0.16
 6 2 -5 4.94 0.15
 6 2 6 1 0.06
 -6 -2 6 1.09 0.07
 -6 2 -6 1.08 0.07
 -6 -2 6 0.93 0.07
 6 -2 -6 1 0.06
 6 -2 6 1.27 0.08
 6 -2 6 1.07 0.05
 -6 -2 -6 1.08 0.07
 -6 2 6 1.15 0.07
 -6 2 6 1.06 0.06
 6 2 -6 1.06 0.06
 -6 -2 7 2.16 0.1
 -6 -2 7 2.13 0.11
 6 -2 -7 2.18 0.1
 -6 2 -7 2.21 0.11
 6 2 7 2.18 0.1
 -6 -2 -7 2.07 0.11
 -6 2 7 2.13 0.11
 6 -2 7 2.2 0.11
 6 2 -7 2.08 0.09
 -6 2 7 2.31 0.1
 -6 -2 8 0.72 0.07
 -6 2 -8 0.71 0.07
 6 -2 -8 0.57 0.05
 6 2 8 0.66 0.06
 -6 -2 8 0.59 0.06
 -6 -2 -8 0.66 0.07
 -6 2 8 0.67 0.07
 6 -2 8 0.64 0.07
 -6 -2 9 1.13 0.09
 -6 2 -9 1.24 0.09
 6 2 9 1.03 0.08
 -6 -2 -9 1.08 0.09
 -6 2 9 1.14 0.09
 6 -2 9 1.24 0.1
 -6 3 0 2.18 0.07
 6 3 0 2.09 0.07
 -6 -3 0 2.28 0.07
 6 -3 0 2.06 0.08
 6 -3 0 2.24 0.08
 -6 -3 0 2.19 0.07
 -6 3 -1 13.17 0.34
 6 3 1 12.87 0.35
 6 -3 -1 13.22 0.37
 6 -3 -1 12.64 0.36
 -6 -3 1 12.63 0.36
 6 3 -1 12.83 0.36
 6 -3 1 12.75 0.37
 -6 -3 -1 12.99 0.34
 6 -3 1 12.96 0.36
 -6 -3 -1 12.81 0.35
 -6 3 1 12.67 0.34
 6 3 -1 13.16 0.33
 6 -3 -2 14.23 0.41
 -6 3 -2 15 0.39
 6 -3 -2 14.15 0.41
 6 3 2 13.79 0.4
 -6 -3 2 14.03 0.41
 6 -3 -2 14.69 0.38
 -6 -3 2 13.78 0.41
 6 -3 2 14.76 0.42
 6 -3 2 14.13 0.4
 -6 -3 -2 15.04 0.39
 6 3 -2 14.6 0.37
 -6 -3 -2 15.14 0.39
 6 -3 -3 31.59 0.9
 -6 -3 3 31.54 0.9
 6 -3 -3 31.37 0.89
 6 3 3 31.61 0.89
 -6 3 -3 33.55 0.84
 6 -3 -3 34.02 0.83
 -6 -3 3 33.39 0.89
 -6 -3 -3 33.7 0.84
 6 -3 3 31.67 0.9
 6 -3 3 32.01 0.88
 6 3 -3 32.65 0.83
 6 3 4 19.16 0.55
 6 -3 -4 20.11 0.55
 6 -3 -4 19.33 0.56
 6 -3 -4 19.96 0.51
 -6 3 -4 19.78 0.53
 -6 -3 4 19.76 0.55
 -6 -3 4 18.61 0.56
 -6 3 4 19.54 0.55
 -6 -3 -4 19.47 0.52
 6 -3 4 19.08 0.54
 6 3 -4 19.93 0.51
 6 -3 4 18.64 0.56
 -6 -3 5 21.13 0.6
 -6 -3 5 20.22 0.6
 -6 3 -5 20.19 0.57
 6 -3 -5 21.04 0.61
 6 3 5 20.86 0.59
 6 -3 -5 21.22 0.55
 -6 -3 -5 20.22 0.57
 6 -3 5 20.79 0.61
 6 -3 5 20.8 0.58
 -6 3 5 21.07 0.6
 -6 3 5 21.15 0.59
 6 3 -5 21.26 0.55
 -6 3 -6 1.36 0.08
 -6 -3 6 1.42 0.08
 6 -3 -6 1.52 0.07
 6 3 6 1.41 0.07
 -6 -3 6 1.4 0.08
 6 -3 6 1.4 0.08
 -6 3 6 1.57 0.08
 -6 -3 -6 1.51 0.08
 6 3 -6 1.58 0.07
 6 -3 6 1.54 0.07
 -6 3 6 1.49 0.08
 -6 3 -7 1.12 0.08
 6 3 7 1.15 0.07
 -6 -3 7 1.15 0.08
 6 -3 -7 1.07 0.07
 -6 -3 7 1.24 0.08
 -6 3 7 1.15 0.08
 6 -3 7 1.25 0.08
 6 3 -7 1.13 0.07
 -6 -3 -7 1.27 0.08
 6 3 8 1.25 0.08
 -6 -3 8 1.23 0.08
 6 -3 -8 1.13 0.07
 -6 -3 8 1.32 0.09
 -6 3 -8 1.11 0.09
 -6 3 8 1.38 0.09
 6 -3 8 1.37 0.09
 -6 -3 -8 1.12 0.09
 -6 -3 9 3.96 0.18
 -6 3 -9 4.07 0.17
 -6 -3 -9 4.07 0.17
 6 -3 9 4.1 0.18
 -6 3 9 3.96 0.17
 6 -4 0 45.96 1.28
 6 4 0 46.39 1.19
 -6 -4 0 47.99 1.26
 -6 -4 0 47.67 1.27
 6 -4 0 45.19 1.27
 -6 -4 0 47.69 1.19
 -6 4 0 47.55 1.19
 6 -4 -1 39.77 1.14
 -6 4 -1 40.49 1.06
 -6 -4 1 42.48 1.13
 6 -4 -1 41.51 1.12
 -6 -4 1 41.17 1.12
 6 -4 1 43.34 1.14
 6 4 -1 41.41 1.05
 -6 -4 -1 41.94 1.05
 -6 -4 -1 41.88 1.11
 -6 4 1 41.87 1.05
 6 -4 1 39.94 1.12
 6 -4 -2 25.89 0.7
 -6 -4 2 24.89 0.71
 6 4 2 23.5 0.69
 -6 -4 2 25.51 0.7
 -6 4 -2 25.16 0.66
 6 -4 -2 25.43 0.71
 6 -4 -2 25.71 0.66
 6 4 -2 25.87 0.65
 6 -4 2 25.89 0.7
 -6 4 2 25.52 0.66
 -6 -4 -2 25.76 0.66
 -6 -4 -2 26.43 0.68
 6 -4 -3 11.31 0.32
 6 -4 -3 11.5 0.3
 -6 4 -3 10.67 0.31
 -6 -4 3 10.5 0.32
 6 4 3 10.73 0.31
 6 -4 -3 10.57 0.32
 -6 -4 3 10.71 0.32
 6 4 -3 10.92 0.29
 6 -4 3 11.12 0.33
 6 -4 3 11.04 0.32
 -6 -4 -3 10.76 0.3
 -6 4 -4 2.74 0.11
 6 -4 -4 2.77 0.11
 -6 -4 4 2.94 0.11
 -6 -4 4 2.99 0.12
 6 -4 -4 2.56 0.11
 6 4 4 2.96 0.1
 6 -4 -4 2.87 0.1
 6 -4 4 2.8 0.11
 6 4 -4 2.73 0.1
 6 -4 4 3.06 0.11
 -6 -4 5 15.83 0.48
 6 -4 -5 16.41 0.44
 6 -4 -5 16.37 0.48
 6 4 5 16.71 0.47
 -6 -4 5 15.58 0.48
 6 -4 -5 16.9 0.47
 -6 4 -5 16.14 0.46
 6 4 -5 16.77 0.44
 -6 4 5 16.59 0.48
 -6 4 5 16.72 0.47
 -6 -4 -5 16.24 0.46
 6 -4 5 16 0.49
 6 -4 5 16.06 0.47
 -6 -4 6 7.32 0.26
 -6 4 -6 7.88 0.25
 -6 -4 6 7.3 0.25
 6 -4 -6 8.15 0.24
 6 4 6 7.91 0.24
 -6 4 6 7.63 0.24
 -6 -4 -6 7.8 0.25
 6 4 -6 8.05 0.23
 6 -4 6 7.3 0.24
 6 -4 6 7.36 0.26
 -6 4 6 7.79 0.25
 -6 4 -7 9.05 0.29
 6 -4 -7 8.84 0.27
 -6 -4 7 8.85 0.3
 -6 -4 7 8.88 0.29
 6 4 -7 8.65 0.27
 -6 -4 -7 8.97 0.29
 6 -4 7 9.02 0.3
 -6 4 7 8.99 0.29
 6 -4 -8 5.22 0.19
 -6 -4 8 5.27 0.2
 -6 4 -8 5.43 0.2
 -6 -4 8 5.39 0.21
 -6 4 8 5.39 0.2
 6 -4 8 5.44 0.21
 -6 -4 -8 5.13 0.2
 -6 4 -9 1.49 0.1
 -6 -4 9 1.73 0.1
 -6 -4 9 1.54 0.11
 -6 4 9 1.59 0.1
 -6 -4 -9 1.69 0.11
 6 -4 9 1.62 0.11
 6 -5 0 1.72 0.07
 -6 -5 0 2.01 0.06
 -6 -5 0 1.92 0.07
 -6 5 0 1.96 0.07
 6 5 0 1.9 0.07
 6 -5 0 1.92 0.08
 -6 -5 1 57.31 1.51
 6 -5 -1 53.71 1.52
 -6 5 -1 56.68 1.42
 6 -5 -1 55.31 1.5
 -6 -5 1 55.31 1.5
 6 -5 1 54 1.51
 6 -5 1 54.29 1.52
 -6 -5 -1 56.04 1.41
 -6 -5 -1 57.71 1.49
 -6 5 1 56.91 1.41
 6 5 -1 55.34 1.41
 6 -5 -2 20.39 0.58
 -6 -5 2 21.13 0.58
 6 -5 -2 21.18 0.55
 -6 -5 2 19.67 0.58
 6 -5 -2 20.96 0.59
 -6 5 -2 21.67 0.55
 -6 -5 -2 21.33 0.56
 6 -5 2 19.97 0.58
 -6 -5 -2 21.1 0.55
 6 -5 2 20.47 0.59
 6 5 -2 20.96 0.54
 -6 5 2 20.67 0.55
 -6 -5 3 1.03 0.05
 6 -5 -3 0.95 0.05
 6 -5 -3 0.98 0.05
 6 -5 -3 0.9 0.05
 6 5 3 0.95 0.04
 -6 5 -3 0.94 0.05
 -6 -5 3 0.94 0.06
 -6 -5 -3 0.97 0.05
 6 -5 3 0.93 0.06
 6 5 -3 1.03 0.05
 6 -5 3 0.91 0.06
 -6 5 -4 7.13 0.22
 -6 -5 4 6.6 0.23
 6 -5 -4 7.18 0.22
 6 -5 -4 6.8 0.22
 -6 -5 4 6.82 0.22
 6 5 4 6.76 0.21
 6 -5 -4 6.92 0.21
 6 -5 4 6.84 0.23
 6 -5 4 7.06 0.22
 6 5 -4 7.24 0.21
 -6 -5 -4 7.01 0.22
 6 -5 -5 4.86 0.17
 6 -5 -5 4.78 0.16
 -6 -5 5 4.38 0.17
 -6 5 -5 4.65 0.17
 -6 -5 5 4.57 0.17
 6 -5 -5 4.68 0.15
 -6 5 5 4.51 0.16
 6 -5 5 4.41 0.16
 -6 5 5 4.57 0.16
 6 5 -5 4.87 0.15
 6 -5 5 4.1 0.17
 -6 -5 6 1.09 0.07
 -6 5 -6 1.2 0.08
 -6 -5 6 1.02 0.07
 6 -5 -6 1.11 0.06
 6 -5 -6 1.09 0.07
 6 -5 6 1.06 0.07
 6 -5 6 1.05 0.07
 6 5 -6 1.19 0.06
 -6 -5 -6 1.04 0.07
 -6 5 6 1.12 0.07
 -6 5 6 1.08 0.06
 6 -5 -7 8.28 0.26
 -6 -5 7 8.78 0.29
 -6 -5 7 8.27 0.29
 -6 5 -7 8.74 0.28
 6 -5 7 8.75 0.3
 6 5 -7 7.99 0.26
 -6 -5 -7 8.72 0.28
 6 -5 7 8.41 0.27
 -6 5 7 8.51 0.28
 -6 -5 8 0.34 0.06
 -6 -5 8 0.35 0.06
 -6 5 -8 0.29 0.06
 6 -5 -8 0.32 0.05
 -6 5 8 0.26 0.05
 6 -5 8 0.31 0.06
 -6 -5 -8 0.26 0.06
 -6 -5 9 0.07 0.06
 -6 -5 9 0.12 0.05
 -6 5 -9 0.17 0.06
 6 -5 9 0.23 0.06
 -6 -5 -9 0.2 0.06
 -6 5 9 0.14 0.05
 -6 -6 0 1.47 0.06
 6 6 0 1.57 0.06
 -6 -6 0 1.51 0.05
 -6 6 0 1.56 0.07
 6 -6 0 1.48 0.06
 6 -6 0 1.47 0.07
 -6 -6 1 2.04 0.09
 6 -6 -1 2.21 0.08
 6 -6 -1 2 0.09
 -6 6 -1 1.97 0.08
 -6 -6 1 2.13 0.07
 -6 -6 -1 2.26 0.08
 6 6 -1 2.13 0.08
 6 -6 1 2.14 0.08
 -6 6 1 2.13 0.08
 6 -6 1 2.03 0.09
 -6 -6 -1 2.12 0.08
 6 -6 -2 6.32 0.21
 -6 -6 2 6.42 0.21
 -6 -6 2 6.71 0.2
 6 -6 -2 6.52 0.2
 6 -6 2 6.36 0.21
 -6 -6 -2 6.74 0.19
 -6 -6 -2 6.53 0.2
 -6 6 2 6.68 0.19
 6 6 -2 6.41 0.19
 6 -6 2 6.35 0.21
 6 -6 -3 0.39 0.04
 -6 -6 3 0.36 0.04
 -6 6 -3 0.44 0.04
 6 -6 -3 0.33 0.04
 -6 -6 3 0.37 0.04
 6 -6 -3 0.43 0.04
 6 -6 3 0.35 0.04
 -6 6 3 0.37 0.04
 6 6 -3 0.42 0.03
 -6 -6 -3 0.42 0.04
 6 -6 3 0.36 0.04
 -6 -6 4 3.05 0.12
 -6 6 -4 3.09 0.12
 6 -6 -4 3 0.12
 -6 -6 4 2.87 0.13
 6 -6 -4 3.07 0.12
 6 -6 -4 3.19 0.12
 6 6 -4 3.16 0.11
 6 -6 4 3.09 0.13
 6 -6 4 3.36 0.13
 -6 -6 -4 3.21 0.12
 6 -6 -5 3.83 0.13
 -6 6 -5 3.43 0.14
 -6 -6 5 3.54 0.14
 6 -6 -5 3.49 0.14
 -6 -6 5 3.48 0.15
 6 -6 -5 3.68 0.13
 -6 6 5 3.42 0.13
 6 -6 5 3.45 0.14
 6 6 -5 3.73 0.13
 -6 6 5 3.55 0.13
 6 -6 5 3.47 0.15
 -6 6 -6 4.3 0.17
 -6 -6 6 4.25 0.17
 6 -6 -6 4.41 0.15
 -6 -6 6 4.45 0.17
 6 -6 6 4.22 0.17
 -6 6 6 4.15 0.16
 6 6 -6 4.23 0.15
 -6 -6 -6 4.44 0.16
 6 -6 6 4.28 0.16
 -6 -6 7 4.55 0.18
 6 -6 -7 3.99 0.15
 -6 6 -7 4.34 0.17
 -6 -6 7 4.23 0.18
 6 6 -7 3.9 0.16
 6 -6 7 4.24 0.18
 -6 6 7 4.06 0.16
 6 -6 7 4.17 0.16
 -6 -6 -7 4.56 0.17
 -6 6 -8 0.68 0.07
 -6 -6 8 0.75 0.08
 -6 -6 8 0.8 0.08
 6 -6 -8 0.66 0.06
 6 -6 8 0.9 0.08
 -6 -6 -8 0.77 0.07
 -6 6 -9 0.54 0.08
 -6 -6 9 0.51 0.07
 -6 -6 9 0.63 0.07
 -6 -6 -9 0.61 0.07
 6 -6 9 0.68 0.08
 6 7 0 24.46 0.64
 -6 -7 0 24.12 0.67
 -6 7 0 24.11 0.64
 6 -7 0 23.44 0.68
 6 -7 0 24.42 0.68
 -6 -7 1 7.07 0.23
 -6 7 -1 7.28 0.22
 6 -7 -1 7.81 0.23
 6 7 1 7.14 0.22
 6 -7 -1 7.15 0.23
 -6 -7 1 7.58 0.21
 -6 7 1 7.47 0.22
 6 7 -1 7.42 0.22
 6 -7 1 7.17 0.24
 6 -7 1 7.66 0.23
 -6 -7 -1 7.25 0.22
 -6 -7 -1 7.33 0.22
 -6 -7 2 2.65 0.11
 -6 -7 2 2.76 0.09
 6 -7 -2 2.7 0.1
 -6 7 -2 2.5 0.1
 6 -7 -2 2.46 0.1
 -6 -7 -2 2.65 0.09
 6 7 -2 2.69 0.1
 -6 -7 -2 2.59 0.1
 6 -7 2 2.54 0.1
 6 -7 2 2.69 0.11
 -6 7 2 2.65 0.1
 -6 7 -3 0.85 0.06
 -6 -7 3 0.76 0.05
 6 -7 -3 0.89 0.05
 6 -7 -3 0.84 0.05
 -6 -7 3 0.71 0.06
 6 -7 -3 0.8 0.05
 6 -7 3 0.84 0.06
 -6 7 3 0.79 0.05
 6 -7 3 0.73 0.06
 -6 -7 -3 1.01 0.06
 6 7 -3 0.86 0.05
 6 -7 -4 6.61 0.2
 -6 7 -4 6.35 0.21
 6 -7 -4 6.43 0.21
 -6 -7 4 6.27 0.21
 -6 -7 4 6.22 0.22
 6 -7 -4 6.47 0.21
 6 -7 4 6.36 0.22
 6 7 -4 6.37 0.2
 -6 -7 -4 6.07 0.21
 6 -7 4 6.55 0.22
 -6 -7 5 9.71 0.32
 6 -7 -5 9.88 0.29
 6 -7 -5 9.88 0.3
 -6 -7 5 9.64 0.31
 -6 7 -5 9.81 0.3
 6 -7 -5 9.78 0.3
 6 7 -5 9.88 0.29
 6 -7 5 9.37 0.31
 -6 -7 -5 9.81 0.3
 6 -7 5 9.57 0.32
 6 -7 -6 0.15 0.04
 -6 -7 6 0.15 0.05
 -6 7 -6 0.15 0.05
 -6 -7 6 0.07 0.04
 6 -7 6 0.15 0.05
 -6 -7 -6 0.13 0.05
 -6 7 6 0.17 0.04
 6 7 -6 0.14 0.04
 -6 -7 7 1.18 0.09
 6 -7 -7 1.08 0.08
 -6 7 -7 1.16 0.09
 -6 -7 7 1.18 0.09
 -6 -7 -7 1.19 0.09
 6 -7 7 1.3 0.09
 6 -7 7 1.19 0.08
 6 -7 -8 1.89 0.1
 -6 -7 8 1.79 0.11
 -6 7 -8 1.71 0.11
 -6 -7 8 1.81 0.11
 6 -7 8 1.64 0.11
 -6 -7 -8 1.71 0.11
 6 -8 0 0.88 0.05
 6 8 0 0.77 0.05
 6 -8 0 0.77 0.06
 -6 8 0 0.79 0.06
 -6 -8 0 0.8 0.05
 6 8 1 15.21 0.42
 -6 -8 1 14.58 0.44
 6 -8 -1 13.88 0.44
 -6 8 -1 15.11 0.42
 6 -8 -1 15.67 0.43
 -6 -8 -1 15.1 0.43
 -6 8 1 15.18 0.42
 6 -8 1 15.09 0.44
 6 -8 1 14.97 0.44
 6 8 -1 14.65 0.41
 -6 8 -2 5.79 0.19
 -6 -8 2 5.39 0.2
 6 -8 -2 5.75 0.2
 6 -8 -2 5.99 0.19
 -6 -8 -2 5.91 0.18
 6 8 -2 5.93 0.19
 -6 -8 -2 5.87 0.19
 -6 8 2 5.66 0.19
 6 -8 2 5.84 0.19
 6 -8 2 5.73 0.2
 -6 8 -3 0.39 0.05
 -6 -8 3 0.38 0.05
 -6 -8 3 0.39 0.04
 6 -8 -3 0.43 0.04
 6 -8 -3 0.45 0.04
 -6 -8 -3 0.46 0.05
 -6 8 3 0.33 0.04
 6 -8 3 0.39 0.04
 6 8 -3 0.47 0.04
 6 -8 3 0.36 0.04
 6 -8 -4 6.03 0.2
 -6 -8 4 6.23 0.22
 6 -8 -4 6.26 0.21
 -6 -8 4 6.02 0.21
 -6 8 -4 6.39 0.21
 6 -8 4 5.92 0.22
 -6 8 4 6.15 0.2
 6 8 -4 6.19 0.2
 6 -8 4 6.06 0.22
 -6 -8 -4 6.38 0.21
 -6 8 -5 3.73 0.15
 6 -8 -5 3.89 0.14
 -6 -8 5 3.99 0.16
 -6 -8 5 3.59 0.15
 -6 -8 -5 3.76 0.15
 6 8 -5 3.66 0.14
 6 -8 5 3.63 0.15
 6 -8 5 3.79 0.16
 -6 -8 6 6.7 0.24
 6 -8 -6 6.47 0.22
 -6 8 -6 6.59 0.23
 -6 -8 6 6.92 0.25
 6 -8 6 6.46 0.23
 -6 -8 -6 6.67 0.23
 6 8 -6 6.02 0.21
 6 -8 6 6.84 0.24
 -6 8 -7 2.92 0.14
 6 -8 -7 2.54 0.12
 -6 -8 7 3.02 0.15
 -6 -8 7 2.75 0.14
 -6 -8 -7 2.94 0.14
 6 -8 7 3.05 0.14
 6 -8 7 2.84 0.14
 -6 -8 8 2.32 0.13
 -6 8 -8 2.15 0.13
 -6 -8 8 2.31 0.13
 6 -8 -8 2.29 0.12
 -6 -8 -8 2.25 0.12
 6 -8 8 2.43 0.13
 -6 -9 0 3.05 0.12
 6 -9 0 3.17 0.11
 -6 9 0 2.98 0.12
 6 9 0 3.01 0.12
 6 -9 0 3 0.13
 -6 9 -1 0.62 0.05
 6 9 1 0.53 0.05
 6 -9 -1 0.54 0.05
 -6 -9 1 0.57 0.05
 6 -9 -1 0.55 0.04
 -6 9 1 0.44 0.05
 6 9 -1 0.59 0.05
 6 -9 1 0.58 0.06
 -6 -9 -1 0.58 0.05
 6 -9 1 0.59 0.04
 -6 -9 2 2.05 0.1
 6 9 2 2.01 0.1
 6 -9 -2 2.01 0.1
 -6 9 -2 2.18 0.1
 6 -9 2 2.08 0.09
 -6 9 2 2.19 0.1
 6 9 -2 2.09 0.09
 6 -9 2 2.1 0.11
 -6 -9 -2 2.05 0.09
 -6 -9 3 2.24 0.11
 -6 9 -3 2.4 0.11
 6 -9 -3 2.41 0.11
 -6 9 3 2.36 0.11
 6 9 -3 2.31 0.1
 -6 -9 -3 2.48 0.11
 6 -9 3 2.37 0.11
 6 -9 3 2.36 0.11
 -6 9 -4 1.33 0.08
 6 -9 -4 1.37 0.08
 -6 -9 4 1.45 0.09
 -6 -9 -4 1.28 0.08
 6 -9 4 1.42 0.09
 6 9 -4 1.42 0.08
 -6 9 4 1.34 0.08
 6 -9 4 1.48 0.08
 -6 -9 5 0.71 0.06
 -6 -9 5 0.8 0.07
 6 -9 -5 0.61 0.06
 -6 9 -5 0.83 0.07
 6 9 -5 0.73 0.06
 6 -9 5 0.7 0.07
 -6 9 5 0.74 0.06
 6 -9 5 0.73 0.07
 -6 -9 -5 0.83 0.07
 6 -9 -6 2.9 0.13
 -6 9 -6 3.04 0.14
 -6 -9 6 2.87 0.13
 -6 -9 6 3 0.14
 6 9 -6 3.02 0.13
 -6 -9 -6 3.31 0.14
 6 -9 6 3.12 0.14
 6 -9 6 3.01 0.14
 -6 -9 7 0.08 0.05
 -6 9 -7 0.03 0.02
 -6 -9 7 0.12 0.06
 6 -9 -7 0.05 0.02
 6 -9 7 0.08 0.05
 -6 -9 -7 0.08 0.05
 6 -9 7 0.14 0.05
 -6 -9 8 0.5 0.07
 -6 -9 8 0.58 0.07
 6 -9 -8 0.65 0.07
 -6 9 -8 0.54 0.07
 -6 -9 -8 0.63 0.07
 6 -9 8 0.64 0.07
 6 -9 8 0.59 0.08
 6 -10 0 7.68 0.27
 -6 -10 0 8.22 0.26
 -6 10 0 8.17 0.26
 6 10 0 7.69 0.25
 -6 10 -1 0.74 0.06
 6 -10 -1 0.58 0.06
 6 10 1 0.67 0.06
 -6 -10 1 0.74 0.06
 6 -10 1 0.67 0.05
 -6 -10 -1 0.58 0.05
 6 -10 1 0.61 0.06
 6 10 -1 0.68 0.06
 -6 10 1 0.55 0.05
 -6 -10 2 1.43 0.09
 6 -10 -2 1.42 0.08
 -6 10 -2 1.57 0.09
 6 10 2 1.54 0.08
 6 10 -2 1.47 0.08
 -6 10 2 1.56 0.09
 6 -10 2 1.5 0.09
 6 -10 2 1.6 0.08
 6 -10 -3 0.14 0.04
 6 10 3 0.15 0.04
 -6 -10 3 0.07 0.04
 -6 10 -3 0.14 0.04
 -6 -10 -3 0.19 0.04
 -6 10 3 0.19 0.04
 6 -10 3 0.15 0.04
 6 10 -3 0.18 0.04
 6 -10 3 0.16 0.05
 -6 -10 4 4.8 0.19
 6 -10 -4 4.57 0.17
 -6 10 -4 4.75 0.18
 -6 -10 -4 4.79 0.18
 6 -10 4 4.35 0.17
 -6 10 4 4.52 0.17
 6 10 -4 4.46 0.17
 6 -10 4 4.43 0.18
 -6 -10 5 1.94 0.11
 -6 10 -5 1.81 0.11
 -6 -10 -5 2.17 0.11
 -6 10 5 1.97 0.1
 6 -10 5 2.05 0.11
 6 -10 5 2.07 0.11
 6 10 -5 1.86 0.1
 6 -10 -6 5.59 0.2
 -6 -10 6 5.66 0.22
 -6 10 -6 5.46 0.21
 -6 -10 -6 5.59 0.21
 6 -10 6 5.77 0.22
 6 10 -6 5.27 0.2
 -6 10 6 5.8 0.2
 6 -10 6 5.54 0.22
 -6 -10 7 1.14 0.1
 6 -10 -7 1.23 0.09
 -6 10 -7 1.18 0.09
 6 -10 7 1.24 0.1
 6 -10 7 1.23 0.09
 -6 10 7 1.21 0.08
 -6 -10 -7 1.23 0.09
 6 -11 0 4.65 0.18
 -6 11 0 4.72 0.17
 6 11 0 4.48 0.17
 -6 -11 0 4.46 0.17
 6 11 1 4.74 0.17
 -6 -11 1 4.66 0.18
 -6 11 -1 4.65 0.17
 6 -11 -1 4.66 0.18
 -6 11 1 4.52 0.17
 6 11 -1 4.55 0.17
 6 -11 1 4.77 0.18
 -6 -11 -1 4.37 0.16
 -6 -11 2 9.06 0.31
 6 11 2 9.59 0.3
 -6 11 -2 9.74 0.3
 6 -11 -2 9.4 0.31
 6 -11 2 9.68 0.32
 -6 11 2 9.58 0.3
 6 11 -2 9.36 0.29
 -6 11 -3 0.41 0.06
 -6 -11 3 0.39 0.06
 6 -11 -3 0.31 0.05
 6 11 3 0.51 0.06
 -6 -11 -3 0.34 0.05
 -6 11 3 0.35 0.05
 6 11 -3 0.27 0.05
 6 -11 3 0.38 0.05
 6 -11 3 0.47 0.06
 -6 11 -4 1.28 0.09
 6 11 4 1.12 0.08
 -6 -11 4 1.19 0.09
 6 11 -4 1.24 0.08
 -6 -11 -4 1.11 0.08
 6 -11 4 1.06 0.08
 6 -11 4 1.1 0.09
 -6 11 4 1.12 0.08
 -6 -11 5 4.54 0.2
 -6 11 -5 4.43 0.19
 6 -11 5 4.57 0.18
 -6 11 5 4.58 0.18
 6 11 -5 4.5 0.18
 -6 -11 -5 5.01 0.19
 6 -11 5 4.73 0.19
 -6 11 -6 5.04 0.2
 -6 -11 6 4.68 0.2
 6 -11 6 4.78 0.2
 -6 -11 -6 4.67 0.19
 -6 11 6 5.04 0.19
 6 -11 6 4.81 0.2
 -6 -12 0 2.78 0.13
 -6 12 0 2.86 0.13
 6 12 0 3 0.13
 6 -12 0 2.94 0.14
 -6 -12 1 1.4 0.09
 6 -12 -1 1.28 0.09
 -6 12 -1 1.22 0.08
 6 12 1 1.18 0.08
 6 -12 1 1.47 0.09
 -6 12 1 1.27 0.08
 6 12 -1 1.31 0.08
 -6 -12 2 2.73 0.13
 -6 12 -2 2.64 0.13
 6 -12 -2 2.55 0.13
 6 12 2 2.69 0.13
 6 -12 2 2.53 0.13
 -6 12 2 2.7 0.13
 6 12 -2 2.66 0.12
 -6 12 -3 1.58 0.1
 6 -12 -3 1.57 0.09
 6 12 3 1.53 0.1
 -6 -12 3 1.64 0.1
 -6 12 3 1.68 0.1
 6 -12 3 1.56 0.1
 6 12 -3 1.52 0.09
 -6 12 -4 1.34 0.1
 6 12 4 1.1 0.09
 -6 -12 4 1.23 0.09
 6 12 -4 1.25 0.09
 6 -12 4 1.15 0.09
 -6 -12 -4 1.29 0.09
 -6 12 4 1.13 0.09
 6 12 5 0.89 0.08
 -6 -12 5 0.83 0.08
 -6 12 -5 1 0.09
 6 12 -5 0.97 0.08
 6 -12 5 0.9 0.08
 -6 12 5 0.98 0.08
 -6 -12 -5 0.95 0.08
 -6 12 -6 0.59 0.08
 -6 12 6 0.54 0.07
 6 -12 6 0.68 0.08
 -6 -12 -6 0.59 0.07
 -6 13 0 1.51 0.1
 6 -13 0 1.58 0.1
 6 13 0 1.69 0.1
 -6 -13 0 1.34 0.09
 -6 -13 1 0.3 0.05
 6 13 1 0.29 0.06
 -6 13 -1 0.33 0.06
 6 -13 -1 0.27 0.05
 6 13 -1 0.35 0.06
 6 -13 1 0.23 0.05
 -6 13 1 0.31 0.06
 -6 13 -2 0.85 0.08
 -6 -13 2 0.85 0.08
 6 13 2 0.74 0.07
 6 -13 -2 0.8 0.07
 6 13 -2 0.71 0.07
 -6 13 2 0.96 0.08
 6 -13 2 0.84 0.08
 6 13 3 0.04 0.02
 -6 13 -3 0.03 0.02
 -6 -13 3 0.11 0.05
 6 13 -3 0.09 0.05
 6 -13 3 0.09 0.05
 -6 13 3 0.03 0.02
 -6 13 -4 1.15 0.09
 6 13 4 1.07 0.09
 -6 -13 4 1.21 0.1
 -6 13 4 1.16 0.09
 6 13 -4 1.18 0.09
 6 -13 4 1.03 0.09
 6 13 5 1 0.09
 -6 13 -5 1.01 0.09
 -6 13 5 1.12 0.09
 6 13 -5 1 0.08
 6 14 0 0.63 0.07
 6 -14 0 0.53 0.07
 -6 14 0 0.65 0.07
 6 14 1 0.54 0.07
 6 -14 -1 0.67 0.07
 -6 14 -1 0.61 0.07
 -6 -14 1 0.56 0.07
 6 -14 1 0.56 0.07
 -6 14 1 0.5 0.07
 6 14 -1 0.52 0.07
 -6 -14 2 3 0.15
 6 14 2 3 0.14
 -6 14 -2 2.76 0.14
 6 -14 -2 2.97 0.14
 -6 14 2 3.03 0.15
 6 14 -2 2.94 0.14
 6 -14 2 2.77 0.15
 6 14 3 1.18 0.09
 -6 14 -3 0.99 0.09
 -6 -14 3 1.09 0.1
 6 14 -3 1.23 0.09
 6 -14 3 1.13 0.1
 -6 14 3 1.17 0.09
 6 15 0 3.64 0.16
 -6 15 0 3.39 0.16
 7 0 0 0 0
 7 0 0 -0.01 0
 -7 0 0 0.01 0.01
 7 0 -1 0.09 0.02
 -7 0 1 0.02 0.01
 7 0 1 0.03 0.01
 7 0 -1 0.05 0.02
 7 0 -2 0.01 0.01
 7 0 -2 -0.02 0.01
 -7 0 2 -0.01 0.01
 7 0 3 0 0.02
 -7 0 3 0.02 0.02
 -7 0 -3 0.01 0.02
 7 0 3 0.02 0.01
 7 0 4 -0.01 0.01
 7 0 4 0.01 0.02
 7 0 -4 -0.01 0.01
 -7 0 -4 0.03 0.03
 -7 0 4 -0.01 0.01
 7 0 -4 0.01 0.02
 -7 0 4 0.04 0.02
 -7 0 -5 0.01 0.01
 7 0 5 0 0.01
 -7 0 5 0 0.01
 7 0 -5 0.01 0.01
 -7 0 5 0.01 0.01
 7 0 6 0 0.01
 -7 0 6 0 0.01
 7 0 -6 0 0.01
 -7 0 -6 0.01 0.01
 -7 0 6 -0.01 0.01
 7 0 7 0 0.01
 -7 0 -7 0 0.01
 -7 0 7 -0.01 0.01
 -7 0 7 0.01 0.01
 7 0 -7 0.06 0.03
 7 0 8 0.01 0.01
 -7 0 -8 -0.01 0.01
 -7 0 8 0.01 0.01
 -7 0 8 0.01 0.01
 7 0 9 -0.02 0.01
 -7 0 9 0.01 0.02
 -7 0 -9 0.13 0.06
 7 1 0 9.7 0.28
 -7 -1 0 10.03 0.25
 7 1 0 10.18 0.28
 -7 1 0 10.12 0.25
 7 -1 0 9.67 0.28
 -7 -1 0 9.99 0.28
 7 -1 0 9.27 0.28
 7 1 1 45.98 1.21
 7 -1 -1 45.38 1.22
 7 -1 -1 43.95 1.2
 -7 1 -1 44.49 1.13
 7 1 1 44.54 1.19
 -7 -1 1 44.61 1.2
 -7 -1 -1 44.88 1.19
 7 -1 1 45.77 1.2
 7 1 -1 45.65 1.22
 -7 -1 -1 41.82 1.12
 7 -1 1 44.14 1.22
 -7 1 1 44.42 1.12
 7 -1 -2 6.87 0.21
 7 1 2 6.73 0.19
 -7 1 -2 7.13 0.19
 7 -1 -2 6.55 0.18
 7 -1 -2 6.92 0.21
 -7 -1 2 6.58 0.2
 7 1 2 7.04 0.2
 7 1 -2 6.5 0.2
 7 -1 2 6.58 0.2
 7 1 -2 6.7 0.17
 -7 1 2 6.72 0.2
 7 -1 2 6.81 0.19
 -7 -1 -2 6.68 0.19
 -7 1 -3 9.42 0.27
 -7 -1 3 9.39 0.29
 7 -1 -3 9.68 0.29
 7 1 3 10.01 0.28
 7 1 3 9.49 0.26
 7 -1 -3 9.79 0.29
 7 -1 -3 9.65 0.25
 -7 -1 -3 9.92 0.27
 -7 1 3 9.76 0.29
 7 -1 3 9.27 0.29
 7 1 -3 9.44 0.25
 7 -1 3 9.82 0.27
 7 1 -3 9.95 0.29
 7 -1 -4 3.91 0.12
 -7 -1 4 3.92 0.14
 -7 -1 4 3.78 0.14
 7 1 4 3.96 0.13
 7 -1 -4 3.76 0.14
 -7 1 -4 4.04 0.13
 7 -1 4 3.98 0.12
 7 1 -4 4.03 0.12
 7 -1 4 4.15 0.14
 -7 -1 -4 3.9 0.13
 -7 1 4 3.95 0.14
 -7 1 -5 9.49 0.29
 7 -1 -5 9.54 0.27
 -7 -1 5 9.35 0.3
 -7 -1 5 9.87 0.3
 7 1 5 9.91 0.3
 -7 1 5 9.6 0.3
 7 -1 5 9.67 0.3
 7 -1 5 9.64 0.28
 -7 1 5 10.02 0.3
 7 1 -5 9.68 0.27
 -7 -1 -5 9.31 0.28
 7 1 6 1.7 0.08
 7 -1 -6 1.46 0.07
 -7 -1 6 1.32 0.08
 -7 1 -6 1.33 0.08
 -7 -1 6 1.49 0.08
 7 1 -6 1.51 0.07
 -7 -1 -6 1.46 0.08
 -7 1 6 1.21 0.08
 7 -1 6 1.44 0.08
 -7 1 6 1.41 0.07
 7 -1 -7 3.41 0.13
 -7 -1 7 3.6 0.15
 -7 -1 7 3.47 0.14
 -7 1 -7 3.5 0.14
 7 1 7 3.37 0.14
 7 1 -7 3.37 0.13
 -7 -1 -7 3.24 0.14
 -7 1 7 3.54 0.14
 7 -1 7 3.53 0.15
 -7 1 -8 0.14 0.05
 -7 -1 8 0.1 0.04
 -7 -1 8 0.14 0.04
 7 -1 8 0.07 0.05
 -7 1 8 0.13 0.05
 -7 -1 -8 0.03 0.02
 -7 1 -9 1.23 0.09
 7 1 9 1.23 0.09
 -7 -1 9 1.2 0.09
 -7 1 9 1.35 0.1
 7 -1 9 1.24 0.09
 -7 -1 -9 1.14 0.09
 7 -2 0 7.59 0.22
 7 2 0 7.3 0.21
 7 -2 0 7.52 0.22
 -7 -2 0 7.66 0.2
 -7 -2 0 7.61 0.22
 -7 2 0 7.51 0.2
 -7 2 -1 43.32 1.07
 7 -2 -1 41.7 1.16
 7 2 1 41.64 1.15
 7 -2 -1 43.06 1.14
 -7 -2 1 40.7 1.14
 7 2 -1 43.75 1.06
 7 -2 1 42.72 1.14
 7 -2 1 40.67 1.16
 -7 2 1 41.09 1.06
 -7 -2 -1 43.02 1.13
 -7 -2 -1 40.73 1.07
 7 2 -1 45.16 1.15
 7 2 2 10.44 0.3
 7 -2 -2 10.64 0.31
 7 -2 -2 9.96 0.3
 -7 2 -2 10.87 0.29
 -7 -2 2 10.38 0.3
 7 -2 -2 10.4 0.27
 7 2 -2 10.38 0.27
 -7 -2 -2 10.46 0.28
 7 2 -2 10.12 0.3
 7 -2 2 10.38 0.31
 7 -2 2 10.94 0.3
 -7 -2 -2 10.19 0.28
 7 -2 -3 35.51 1.01
 -7 -2 3 37.44 1.01
 -7 2 -3 37.31 0.95
 7 -2 -3 35.88 0.93
 7 2 3 36.7 1.01
 -7 -2 3 37.72 1.02
 7 -2 -3 36.6 1.02
 7 -2 3 36.26 1
 -7 2 3 38.33 1.01
 -7 -2 -3 37.93 0.95
 7 -2 3 36.63 1.02
 7 2 -3 35.38 1.02
 7 2 -3 37.35 0.93
 -7 -2 4 3.22 0.12
 7 2 4 3.3 0.11
 -7 2 -4 3.19 0.12
 7 -2 -4 3.28 0.12
 7 -2 -4 3.16 0.12
 -7 -2 4 3.24 0.12
 7 -2 -4 3.2 0.1
 7 2 -4 3.4 0.1
 7 -2 4 3.21 0.12
 7 -2 4 3.36 0.11
 -7 2 4 3.38 0.12
 -7 -2 -4 3.29 0.12
 7 2 5 7.14 0.22
 -7 -2 5 6.83 0.23
 7 -2 -5 6.33 0.23
 -7 -2 5 7.01 0.23
 7 -2 -5 6.77 0.2
 7 2 -5 6.99 0.2
 7 -2 5 7.15 0.21
 7 -2 5 6.83 0.23
 -7 2 5 7.01 0.22
 -7 -2 -5 6.73 0.22
 -7 2 5 6.9 0.23
 -7 -2 6 5.04 0.18
 -7 2 -6 4.92 0.18
 -7 -2 6 4.62 0.18
 7 -2 -6 5.12 0.16
 7 2 6 4.95 0.17
 -7 -2 -6 4.86 0.18
 -7 2 6 4.91 0.17
 -7 2 6 4.99 0.18
 7 2 -6 5.17 0.16
 7 -2 6 4.91 0.18
 -7 -2 7 4.69 0.18
 -7 2 -7 4.56 0.17
 7 -2 -7 4.61 0.16
 -7 -2 7 4.62 0.17
 7 2 7 4.65 0.17
 -7 2 7 4.59 0.17
 7 -2 7 4.54 0.18
 -7 -2 -7 4.58 0.17
 -7 2 7 4.82 0.18
 -7 -2 8 2.71 0.14
 7 2 8 2.77 0.13
 -7 2 -8 2.78 0.13
 -7 -2 8 2.82 0.13
 -7 -2 -8 2.95 0.14
 -7 2 8 2.9 0.14
 7 -2 8 2.83 0.14
 7 2 9 4.67 0.19
 -7 -2 9 4.73 0.2
 -7 2 -9 4.84 0.19
 -7 -2 -9 4.43 0.19
 7 -2 9 4.92 0.2
 -7 2 9 4.67 0.2
 7 -3 0 13.14 0.39
 -7 -3 0 13.86 0.38
 -7 3 0 13.68 0.36
 -7 -3 0 13.8 0.35
 7 3 0 13.16 0.38
 7 -3 0 13.98 0.38
 7 -3 -1 46.26 1.36
 -7 3 -1 50.57 1.26
 7 3 1 50.51 1.34
 -7 -3 1 50.58 1.34
 7 -3 -1 52.05 1.34
 -7 -3 -1 50.41 1.33
 7 3 -1 49.67 1.25
 7 -3 1 49.94 1.36
 -7 3 1 50.02 1.25
 7 3 -1 49.9 1.35
 7 -3 1 47.04 1.34
 -7 -3 -1 49.11 1.25
 7 -3 -2 4.7 0.15
 7 -3 -2 4.6 0.15
 7 3 2 4.65 0.14
 -7 -3 2 4.61 0.15
 7 -3 -2 4.75 0.13
 -7 -3 2 4.52 0.15
 -7 3 -2 4.68 0.14
 7 -3 2 4.44 0.15
 7 3 -2 4.82 0.13
 -7 3 2 4.56 0.13
 -7 -3 -2 4.76 0.14
 7 -3 2 4.86 0.15
 -7 -3 -2 4.75 0.13
 7 3 -2 4.63 0.15
 7 -3 -3 0.5 0.04
 7 -3 -3 0.53 0.04
 7 3 3 0.68 0.03
 -7 3 -3 0.53 0.04
 7 -3 -3 0.53 0.03
 -7 -3 3 0.71 0.05
 7 -3 3 0.67 0.04
 7 -3 3 0.65 0.04
 7 3 -3 0.52 0.03
 -7 -3 -3 0.52 0.04
 7 3 4 0.82 0.04
 -7 -3 4 0.82 0.05
 7 -3 -4 0.86 0.04
 -7 -3 4 0.77 0.05
 7 -3 -4 0.94 0.05
 7 -3 -4 0.79 0.05
 -7 3 -4 0.76 0.05
 -7 3 4 0.85 0.05
 -7 -3 -4 0.77 0.05
 7 -3 4 0.79 0.05
 7 -3 4 0.77 0.05
 7 3 -4 0.85 0.04
 -7 3 -5 0.47 0.05
 7 -3 -5 0.41 0.04
 7 3 5 0.38 0.04
 -7 -3 5 0.37 0.04
 7 -3 -5 0.41 0.03
 7 -3 -5 0.34 0.04
 -7 -3 5 0.36 0.04
 -7 3 5 0.39 0.04
 7 -3 5 0.32 0.04
 7 -3 5 0.3 0.03
 -7 3 5 0.38 0.04
 -7 -3 -5 0.4 0.05
 7 3 -5 0.44 0.04
 -7 3 -6 4.78 0.17
 7 3 6 5.01 0.17
 -7 -3 6 4.68 0.18
 7 -3 -6 5.2 0.16
 -7 -3 6 4.91 0.18
 -7 3 6 4.79 0.17
 -7 -3 -6 5.03 0.18
 -7 3 6 4.92 0.18
 7 -3 6 4.6 0.18
 7 3 -6 5.09 0.16
 7 -3 6 5.05 0.16
 7 -3 -7 4.14 0.15
 7 3 7 4.17 0.16
 -7 -3 7 4.27 0.17
 -7 -3 7 4.4 0.18
 -7 3 -7 4.11 0.17
 -7 3 7 4.34 0.16
 7 -3 7 4.36 0.18
 -7 3 7 4.26 0.17
 -7 -3 -7 4.22 0.17
 -7 -3 8 2.98 0.15
 -7 3 -8 3.29 0.14
 -7 -3 8 2.97 0.14
 7 3 8 2.85 0.13
 7 -3 8 2.99 0.15
 -7 3 8 3.09 0.14
 -7 -3 -8 2.89 0.14
 -7 3 -9 0.35 0.06
 -7 -3 9 0.4 0.06
 -7 -3 9 0.41 0.07
 -7 3 9 0.37 0.06
 7 -3 9 0.46 0.07
 -7 -3 -9 0.42 0.07
 7 -4 0 51.91 1.36
 7 4 0 50.37 1.36
 -7 4 0 50.15 1.28
 -7 -4 0 50.8 1.27
 7 -4 0 46.56 1.38
 -7 -4 0 51.73 1.35
 7 4 0 51.2 1.27
 7 -4 -1 7.03 0.22
 -7 4 -1 7.64 0.21
 7 -4 -1 7.32 0.23
 -7 -4 1 7.37 0.22
 -7 -4 1 7.49 0.22
 7 4 -1 7.88 0.22
 7 4 -1 7.51 0.2
 7 -4 1 7.32 0.23
 -7 -4 -1 7.65 0.21
 -7 4 1 7.55 0.21
 7 -4 1 7.46 0.23
 -7 -4 -1 7.66 0.21
 7 -4 -2 23.44 0.64
 7 4 2 22.47 0.62
 7 -4 -2 23.04 0.65
 -7 -4 2 22.91 0.64
 -7 4 -2 22.37 0.6
 -7 -4 2 22.61 0.64
 7 -4 -2 22.83 0.59
 -7 -4 -2 23.52 0.62
 7 -4 2 23.06 0.64
 7 -4 2 22.49 0.65
 -7 -4 -2 23.31 0.6
 7 4 -2 23.23 0.59
 -7 4 2 22.99 0.59
 -7 -4 3 6.81 0.22
 -7 -4 3 6.49 0.22
 -7 4 -3 6.96 0.21
 7 -4 -3 6.89 0.22
 7 -4 -3 6.92 0.2
 7 -4 -3 7 0.22
 7 4 3 7.08 0.2
 7 -4 3 7.17 0.22
 7 -4 3 6.62 0.22
 -7 -4 -3 7.1 0.21
 7 4 -3 7.04 0.19
 -7 -4 4 0.9 0.06
 7 4 4 0.95 0.04
 -7 4 -4 0.89 0.06
 7 -4 -4 0.91 0.05
 7 -4 -4 0.97 0.06
 7 -4 -4 0.87 0.05
 -7 -4 4 0.97 0.06
 7 -4 4 1.01 0.06
 7 -4 4 0.96 0.05
 -7 -4 -4 0.92 0.06
 7 4 -4 0.92 0.05
 -7 -4 5 0.33 0.04
 -7 4 -5 0.42 0.05
 7 4 5 0.4 0.04
 -7 -4 5 0.36 0.04
 7 -4 -5 0.47 0.04
 7 -4 -5 0.41 0.04
 7 -4 -5 0.45 0.05
 -7 4 5 0.35 0.04
 7 4 -5 0.47 0.04
 7 -4 5 0.37 0.04
 7 -4 5 0.38 0.05
 -7 -4 -5 0.45 0.05
 7 4 6 2.32 0.1
 7 -4 -6 2.32 0.1
 -7 4 -6 2.35 0.11
 -7 -4 6 2.42 0.11
 -7 -4 6 2.33 0.11
 7 -4 6 2.33 0.11
 7 -4 6 2.4 0.1
 7 4 -6 2.31 0.09
 -7 4 6 2.37 0.1
 -7 -4 -6 2.25 0.11
 -7 4 6 2.36 0.11
 7 -4 -7 4.44 0.16
 -7 -4 7 4.48 0.18
 -7 4 -7 4.59 0.17
 -7 -4 7 4.34 0.18
 7 -4 7 4.53 0.18
 -7 4 7 4.29 0.17
 -7 -4 -7 4.47 0.17
 -7 -4 8 0.37 0.06
 -7 -4 8 0.24 0.06
 -7 4 -8 0.39 0.06
 7 -4 8 0.43 0.06
 -7 4 8 0.36 0.06
 -7 -4 -8 0.39 0.06
 -7 -4 9 0.23 0.06
 -7 -4 9 0.21 0.06
 -7 4 -9 0.11 0.06
 7 -4 9 0.23 0.06
 -7 4 9 0.21 0.05
 -7 -4 -9 0.16 0.06
 -7 -5 0 10.73 0.31
 -7 5 0 11.16 0.3
 7 -5 0 10.78 0.32
 7 5 0 10.66 0.3
 -7 -5 0 11.02 0.3
 7 -5 0 11.16 0.32
 7 -5 -1 31.04 0.88
 -7 -5 1 33.3 0.88
 -7 -5 1 32.37 0.88
 7 -5 -1 30.96 0.89
 -7 5 -1 33.04 0.83
 7 -5 1 31.04 0.89
 -7 -5 -1 32.44 0.87
 7 -5 1 31.59 0.88
 -7 5 1 32.75 0.83
 -7 -5 -1 33.01 0.83
 7 5 -1 31.6 0.82
 -7 -5 2 0.11 0.03
 -7 -5 2 0.11 0.02
 -7 5 -2 0.12 0.02
 7 -5 -2 0.14 0.02
 7 -5 -2 0.16 0.03
 -7 5 2 0.17 0.02
 7 -5 2 0.15 0.03
 7 -5 2 0.1 0.03
 -7 -5 -2 0.14 0.02
 -7 -5 -2 0.11 0.02
 7 5 -2 0.13 0.02
 -7 -5 3 18.56 0.52
 7 -5 -3 17.76 0.48
 7 -5 -3 18.17 0.52
 7 -5 -3 18.11 0.52
 -7 -5 3 18.31 0.52
 -7 5 -3 18.07 0.49
 -7 -5 -3 17.78 0.49
 7 5 -3 18.11 0.48
 7 -5 3 18.95 0.52
 7 -5 3 17.86 0.53
 7 -5 -4 9.09 0.26
 -7 5 -4 9.02 0.27
 7 -5 -4 8.86 0.28
 -7 -5 4 8.42 0.28
 7 -5 -4 8.95 0.28
 -7 -5 4 8.93 0.28
 -7 -5 -4 8.87 0.27
 7 -5 4 8.97 0.28
 7 -5 4 8.76 0.29
 7 5 -4 9.27 0.25
 -7 -5 5 9.2 0.29
 -7 5 -5 8.72 0.28
 7 -5 -5 9.06 0.28
 7 -5 -5 9.56 0.29
 7 -5 -5 8.96 0.26
 -7 -5 5 8.98 0.29
 -7 5 5 9.26 0.28
 7 5 -5 9.49 0.26
 -7 -5 -5 9.03 0.28
 7 -5 5 9.27 0.28
 7 -5 5 8.68 0.3
 -7 5 -6 0.09 0.04
 -7 -5 6 0.13 0.04
 7 -5 -6 0.08 0.03
 -7 -5 6 0.12 0.04
 7 -5 -6 0.1 0.03
 7 5 -6 0.05 0.03
 7 -5 6 0.13 0.03
 -7 5 6 0.08 0.03
 7 -5 6 0.08 0.04
 -7 5 6 0.1 0.03
 -7 -5 -6 0.13 0.04
 -7 -5 7 6.67 0.24
 7 -5 -7 6.05 0.21
 -7 -5 7 6.94 0.24
 -7 5 -7 6.79 0.23
 7 -5 7 6.93 0.25
 -7 -5 -7 6.73 0.23
 -7 5 7 6.7 0.24
 -7 -5 8 1.01 0.08
 -7 5 -8 0.97 0.08
 -7 -5 8 0.79 0.08
 7 -5 8 1 0.09
 -7 5 8 0.87 0.07
 -7 -5 -8 1.07 0.08
 -7 -5 9 7.45 0.28
 -7 -5 9 7.23 0.27
 -7 5 -9 7.67 0.27
 -7 -5 -9 7.4 0.26
 7 -5 9 7.37 0.28
 -7 5 9 7.19 0.26
 -7 6 0 4.92 0.15
 7 6 0 4.92 0.15
 7 -6 0 4.73 0.16
 7 -6 0 4.9 0.17
 -7 -6 0 4.88 0.16
 -7 -6 0 4.79 0.14
 7 -6 -1 16.82 0.49
 -7 -6 1 17.4 0.48
 -7 -6 1 16.23 0.49
 7 -6 -1 17.18 0.49
 -7 6 -1 17.97 0.47
 7 6 -1 17.07 0.46
 7 -6 1 16.79 0.49
 -7 6 1 17.2 0.46
 -7 -6 -1 17.76 0.48
 7 -6 1 17.01 0.49
 -7 -6 -1 17.43 0.46
 7 -6 -2 2 0.08
 -7 6 -2 1.75 0.08
 7 -6 -2 1.7 0.08
 -7 -6 2 1.88 0.07
 -7 -6 -2 1.79 0.08
 7 6 -2 1.81 0.07
 -7 6 2 1.75 0.07
 -7 -6 -2 1.81 0.06
 7 -6 2 1.75 0.08
 7 -6 2 1.78 0.08
 7 -6 -3 33.77 0.88
 -7 6 -3 32.98 0.89
 -7 -6 3 33.45 0.94
 7 -6 -3 34.4 0.94
 -7 -6 3 34.84 0.94
 7 -6 -3 34.51 0.95
 7 -6 3 33.35 0.94
 -7 -6 -3 34.07 0.89
 7 -6 3 32.58 0.95
 -7 6 3 34.62 0.88
 7 6 -3 34.6 0.88
 7 -6 -4 6.17 0.2
 -7 -6 4 5.62 0.2
 7 -6 -4 5.99 0.2
 -7 -6 4 5.87 0.2
 -7 6 -4 5.59 0.19
 7 -6 -4 5.65 0.18
 -7 -6 -4 5.84 0.19
 7 6 -4 6.1 0.18
 7 -6 4 5.78 0.2
 7 -6 4 5.67 0.2
 -7 -6 5 10.37 0.33
 7 -6 -5 10.23 0.32
 -7 -6 5 10.64 0.33
 -7 6 -5 10.07 0.31
 7 -6 -5 10.39 0.32
 7 -6 -5 10.16 0.3
 -7 6 5 10.31 0.31
 -7 -6 -5 10.08 0.31
 7 -6 5 10.17 0.32
 7 -6 5 10.36 0.33
 7 6 -5 10.16 0.3
 -7 6 -6 3.81 0.15
 -7 -6 6 3.88 0.16
 7 -6 -6 3.66 0.14
 -7 -6 6 3.9 0.16
 -7 6 6 3.72 0.14
 7 -6 6 3.6 0.15
 -7 6 6 3.73 0.15
 -7 -6 -6 3.94 0.15
 7 6 -6 3.76 0.14
 7 -6 6 3.78 0.16
 -7 -6 7 7.65 0.26
 -7 6 -7 7.27 0.25
 -7 -6 7 7.3 0.26
 7 -6 -7 6.64 0.23
 -7 -6 -7 7.28 0.25
 7 -6 7 7.13 0.26
 -7 6 7 6.77 0.24
 7 -6 7 6.79 0.24
 -7 -6 8 0.89 0.08
 -7 6 -8 0.8 0.08
 -7 -6 8 0.88 0.08
 -7 -6 -8 0.88 0.08
 7 -6 8 1 0.09
 -7 6 8 0.75 0.07
 -7 -6 9 4.49 0.19
 -7 6 -9 4.47 0.19
 -7 -6 9 4.56 0.2
 -7 -6 -9 4.43 0.19
 7 -6 9 4.76 0.2
 -7 -7 0 15.92 0.45
 7 -7 0 15.37 0.46
 7 7 0 16.17 0.43
 -7 7 0 16.39 0.44
 7 -7 0 15.77 0.46
 7 7 1 10.07 0.3
 7 -7 -1 11.04 0.31
 -7 -7 1 10.19 0.31
 -7 7 -1 10.76 0.3
 7 -7 -1 9.77 0.32
 7 -7 1 10.79 0.32
 7 7 -1 10.62 0.3
 7 -7 1 9.88 0.32
 -7 -7 -1 10.69 0.31
 -7 7 1 10.62 0.3
 -7 -7 -1 10.95 0.3
 7 -7 -2 1.39 0.07
 -7 -7 2 1.28 0.07
 7 -7 -2 1.35 0.07
 -7 -7 2 1.41 0.06
 -7 7 -2 1.33 0.07
 -7 -7 -2 1.28 0.07
 -7 7 2 1.35 0.07
 7 -7 2 1.25 0.07
 -7 -7 -2 1.46 0.06
 7 7 -2 1.38 0.06
 7 -7 2 1.36 0.07
 7 -7 -3 34.02 0.94
 7 -7 -3 33.07 0.93
 -7 -7 3 31.6 0.94
 -7 7 -3 32.87 0.89
 -7 -7 3 35.36 0.94
 -7 -7 -3 33.02 0.88
 7 7 -3 34.65 0.88
 -7 7 3 33.52 0.88
 7 -7 3 34.08 0.95
 7 -7 3 33.72 0.94
 7 -7 -4 3.38 0.13
 -7 -7 4 3.42 0.14
 7 -7 -4 3.61 0.14
 -7 -7 4 3.7 0.14
 -7 7 -4 3.4 0.14
 7 -7 -4 3.73 0.13
 7 -7 4 3.43 0.14
 -7 -7 -4 3.51 0.14
 7 -7 4 3.51 0.14
 -7 7 4 3.6 0.13
 7 7 -4 3.64 0.13
 7 -7 -5 5.42 0.19
 -7 -7 5 5.74 0.21
 7 -7 -5 5.42 0.19
 7 -7 -5 5.41 0.18
 -7 -7 5 5.54 0.2
 -7 7 -5 5.29 0.19
 -7 -7 -5 5.46 0.19
 7 7 -5 5.58 0.18
 7 -7 5 5.61 0.21
 7 -7 5 5.58 0.2
 -7 -7 6 7.74 0.27
 7 -7 -6 7.88 0.25
 -7 -7 6 8.14 0.27
 -7 7 -6 7.89 0.26
 -7 -7 -6 7.86 0.26
 7 -7 6 7.84 0.27
 7 7 -6 7.38 0.24
 -7 7 6 7.33 0.25
 7 -7 6 7.82 0.26
 7 -7 -7 1.62 0.09
 -7 -7 7 1.69 0.1
 -7 7 -7 1.7 0.11
 -7 -7 7 1.87 0.11
 7 -7 7 1.66 0.11
 7 -7 7 1.43 0.09
 -7 -7 -7 1.66 0.1
 -7 7 -8 1.66 0.11
 -7 -7 8 1.61 0.11
 -7 -7 8 1.49 0.1
 -7 -7 -8 1.42 0.1
 7 -7 8 1.62 0.11
 -7 -8 0 0.02 0.01
 7 8 0 0.01 0.01
 7 -8 0 0.02 0.01
 -7 8 0 0.01 0.01
 7 -8 0 0.01 0.01
 7 -8 -1 0.82 0.06
 -7 8 -1 0.86 0.06
 -7 -8 1 0.8 0.06
 7 -8 -1 0.82 0.05
 7 8 1 0.68 0.05
 7 -8 1 0.77 0.06
 7 -8 1 0.71 0.05
 -7 8 1 0.71 0.05
 7 8 -1 0.85 0.05
 -7 -8 -1 0.78 0.05
 -7 8 -2 0.31 0.04
 -7 -8 2 0.19 0.04
 7 -8 -2 0.29 0.04
 7 -8 -2 0.25 0.03
 7 -8 2 0.31 0.04
 -7 8 2 0.28 0.04
 -7 -8 -2 0.24 0.03
 7 8 -2 0.25 0.04
 7 -8 2 0.24 0.04
 -7 -8 3 5.53 0.18
 7 -8 -3 5.6 0.18
 -7 -8 3 5.28 0.19
 -7 8 -3 5.53 0.19
 7 -8 -3 5.62 0.19
 7 8 -3 5.42 0.18
 -7 -8 -3 5.45 0.18
 7 -8 3 5.45 0.2
 7 -8 3 5.14 0.19
 -7 8 3 5.23 0.18
 7 -8 -4 0.93 0.06
 7 -8 -4 0.97 0.06
 -7 8 -4 0.94 0.07
 -7 -8 4 0.89 0.07
 -7 -8 4 0.92 0.06
 7 -8 -4 0.91 0.06
 7 -8 4 0.98 0.07
 7 8 -4 1 0.06
 -7 -8 -4 1 0.07
 -7 8 4 1.01 0.06
 7 -8 4 1.09 0.07
 -7 8 -5 1.61 0.09
 -7 -8 5 1.52 0.09
 7 -8 -5 1.43 0.08
 -7 -8 5 1.67 0.1
 7 -8 -5 1.48 0.08
 7 8 -5 1.44 0.08
 -7 8 5 1.61 0.08
 7 -8 5 1.49 0.09
 7 -8 5 1.6 0.09
 -7 -8 -5 1.39 0.08
 -7 -8 6 0.05 0.02
 -7 8 -6 0.16 0.05
 7 -8 -6 0.17 0.04
 7 -8 6 0.06 0.04
 7 -8 6 0.2 0.05
 -7 -8 -6 0.16 0.05
 -7 -8 7 0.1 0.05
 7 -8 -7 0.09 0.04
 -7 8 -7 0.1 0.05
 -7 -8 7 0.04 0.02
 -7 -8 -7 0.17 0.05
 7 -8 7 0.15 0.05
 7 -8 7 0.12 0.05
 -7 -8 8 0.28 0.06
 -7 -8 8 0.25 0.06
 -7 8 -8 0.36 0.06
 -7 -8 -8 0.35 0.06
 7 -8 8 0.31 0.07
 -7 -9 0 21.58 0.62
 7 -9 0 21.32 0.63
 -7 9 0 21.81 0.6
 7 9 0 21.48 0.59
 7 -9 0 22.92 0.62
 -7 -9 1 11.31 0.34
 7 9 1 10.38 0.32
 -7 9 -1 11.1 0.33
 7 -9 -1 11.08 0.34
 7 -9 -1 11.49 0.33
 -7 9 1 10.46 0.32
 7 9 -1 11.06 0.32
 7 -9 1 10.49 0.33
 -7 -9 -1 11.8 0.33
 7 -9 1 10.27 0.34
 7 9 2 13.39 0.4
 -7 -9 2 14.03 0.42
 7 -9 -2 14.36 0.41
 -7 9 -2 13.98 0.41
 7 -9 -2 13.94 0.42
 7 -9 2 14.14 0.42
 7 9 -2 14.17 0.4
 -7 -9 -2 13.7 0.4
 7 -9 2 13.94 0.43
 -7 9 2 14.28 0.4
 -7 9 -3 15.46 0.45
 7 -9 -3 15.58 0.46
 -7 -9 3 14.97 0.47
 -7 9 3 15.59 0.44
 7 -9 3 15.8 0.47
 7 -9 3 15.64 0.47
 -7 -9 -3 15.41 0.44
 7 9 -3 15.77 0.44
 -7 -9 4 0.83 0.07
 -7 9 -4 0.76 0.06
 7 -9 -4 0.82 0.06
 7 9 -4 0.75 0.06
 7 -9 4 0.76 0.06
 7 -9 4 0.69 0.07
 -7 9 4 0.78 0.06
 -7 -9 -4 0.88 0.07
 -7 -9 5 3.95 0.16
 -7 9 -5 3.79 0.16
 -7 -9 5 4.37 0.18
 7 -9 -5 3.91 0.15
 -7 -9 -5 4.16 0.16
 7 9 -5 3.67 0.15
 7 -9 5 4.17 0.17
 7 -9 5 4.17 0.17
 -7 9 5 4.11 0.15
 -7 -9 6 1.71 0.1
 -7 9 -6 1.99 0.12
 7 -9 -6 1.82 0.1
 -7 -9 6 1.98 0.12
 -7 9 6 1.94 0.1
 7 -9 6 2.06 0.11
 7 -9 6 1.93 0.11
 -7 -9 -6 2.01 0.11
 7 -9 -7 0.63 0.06
 -7 -9 7 0.5 0.07
 -7 -9 7 0.54 0.07
 -7 9 -7 0.57 0.07
 7 -9 7 0.56 0.07
 7 -9 7 0.48 0.07
 -7 -9 -7 0.64 0.07
 7 10 0 0.5 0.05
 7 -10 0 0.55 0.05
 -7 10 0 0.65 0.06
 7 -10 0 0.47 0.05
 -7 -10 0 0.59 0.05
 -7 10 -1 16.03 0.46
 7 10 1 15.94 0.45
 7 -10 -1 15.69 0.48
 -7 -10 1 16.41 0.48
 -7 -10 -1 15.63 0.46
 7 -10 1 15.98 0.47
 7 -10 1 15.76 0.48
 -7 10 1 16.5 0.46
 7 10 -1 15.84 0.45
 7 -10 -2 0.43 0.05
 7 10 2 0.42 0.05
 -7 10 -2 0.45 0.05
 -7 -10 2 0.42 0.05
 7 -10 2 0.51 0.05
 7 -10 2 0.39 0.05
 7 10 -2 0.47 0.05
 -7 10 2 0.42 0.05
 -7 -10 3 0.09 0.04
 -7 10 -3 0.13 0.05
 7 -10 -3 0.12 0.04
 7 10 3 0.07 0.04
 7 10 -3 0.05 0.03
 -7 -10 -3 0.08 0.04
 7 -10 3 0.09 0.04
 7 -10 3 0.07 0.03
 -7 10 3 0.05 0.04
 7 -10 -4 0.02 0.02
 -7 10 -4 0.02 0.02
 -7 -10 4 0.12 0.05
 -7 -10 -4 0.06 0.04
 7 -10 4 0.13 0.05
 -7 10 4 0.08 0.04
 -7 -10 5 3.59 0.16
 -7 10 -5 3.57 0.16
 7 10 -5 3.12 0.14
 -7 10 5 3.34 0.14
 -7 -10 -5 3.42 0.15
 7 -10 5 3.23 0.15
 7 -10 5 3.6 0.16
 -7 10 -6 0.61 0.07
 7 -10 -6 0.69 0.07
 -7 -10 6 0.64 0.08
 7 -10 6 0.69 0.07
 -7 -10 -6 0.74 0.08
 7 -10 6 0.69 0.07
 -7 10 6 0.66 0.06
 -7 -10 7 3.05 0.15
 -7 10 -7 2.69 0.14
 7 -10 -7 2.85 0.13
 -7 -10 -7 2.96 0.15
 7 -10 7 2.95 0.14
 7 -10 7 2.91 0.15
 -7 10 7 3.12 0.14
 -7 -11 0 0.8 0.06
 7 11 0 0.8 0.06
 7 -11 0 0.77 0.07
 -7 11 0 0.86 0.07
 -7 11 -1 1.82 0.1
 -7 -11 1 1.67 0.1
 7 11 1 1.74 0.1
 7 -11 -1 1.95 0.1
 7 11 -1 1.77 0.09
 -7 11 1 1.92 0.1
 7 -11 1 1.93 0.1
 -7 -11 2 1.17 0.08
 -7 11 -2 1.14 0.08
 7 11 2 1.17 0.08
 7 -11 -2 1.06 0.08
 7 11 -2 1.11 0.07
 7 -11 2 1.06 0.08
 -7 11 2 1.07 0.07
 -7 11 -3 2.25 0.12
 7 11 3 2.12 0.11
 -7 -11 3 2.13 0.12
 7 -11 -3 2.12 0.11
 -7 -11 -3 2.11 0.11
 7 11 -3 2.1 0.1
 -7 11 3 2.1 0.11
 7 -11 3 2.01 0.1
 7 -11 3 2.21 0.12
 7 11 4 1.93 0.11
 -7 -11 4 2 0.11
 -7 11 -4 1.99 0.11
 7 11 -4 1.76 0.1
 -7 11 4 1.83 0.1
 7 -11 4 1.86 0.11
 7 -11 4 1.71 0.1
 -7 -11 -4 1.95 0.11
 -7 11 -5 0.39 0.07
 -7 -11 5 0.4 0.07
 -7 -11 -5 0.42 0.06
 7 11 -5 0.44 0.06
 7 -11 5 0.35 0.06
 7 -11 5 0.45 0.06
 -7 11 5 0.35 0.06
 -7 11 -6 0.32 0.06
 -7 -11 6 0.12 0.06
 7 -11 6 0.19 0.05
 7 -11 6 0.21 0.06
 -7 11 6 0.16 0.05
 -7 -11 -6 0.16 0.05
 -7 -12 0 0.09 0.04
 7 12 0 0.14 0.04
 7 -12 0 0.18 0.05
 -7 12 0 0.15 0.05
 7 -12 -1 2.27 0.12
 -7 -12 1 2.2 0.11
 -7 12 -1 2.39 0.12
 7 12 1 2.33 0.12
 -7 12 1 2.3 0.12
 7 -12 1 2.1 0.12
 7 12 -1 2.31 0.11
 -7 -12 2 0.78 0.07
 7 12 2 0.62 0.07
 -7 12 -2 0.69 0.07
 7 -12 -2 0.73 0.07
 -7 12 2 0.73 0.07
 7 12 -2 0.72 0.06
 7 -12 2 0.51 0.07
 -7 -12 3 1.24 0.09
 -7 12 -3 1.2 0.09
 7 -12 -3 1.03 0.08
 7 12 3 1.26 0.09
 7 -12 3 1.21 0.09
 -7 12 3 1.08 0.08
 7 12 -3 1.08 0.08
 7 12 4 4.69 0.19
 -7 -12 4 4.55 0.2
 -7 12 -4 4.84 0.19
 7 12 -4 4.57 0.18
 -7 12 4 4.74 0.18
 7 -12 4 4.83 0.2
 -7 -12 -4 4.63 0.19
 7 12 5 0.27 0.06
 -7 -12 5 0.21 0.06
 -7 12 -5 0.31 0.06
 -7 -12 -5 0.44 0.07
 -7 12 5 0.21 0.05
 7 -12 5 0.34 0.06
 7 -13 0 0.02 0.02
 7 13 0 0.09 0.05
 -7 13 0 0.04 0.02
 -7 -13 1 2.25 0.12
 -7 13 -1 2.51 0.13
 7 13 1 2.58 0.12
 7 -13 -1 2.59 0.13
 -7 13 1 2.43 0.12
 7 13 -1 2.39 0.12
 7 -13 1 2.33 0.13
 -7 13 -2 2.28 0.12
 7 13 2 2.47 0.12
 7 -13 -2 2.22 0.12
 -7 -13 2 2.12 0.12
 7 -13 2 2.19 0.13
 -7 13 2 2.19 0.12
 7 13 -2 2.39 0.12
 7 13 3 2.23 0.12
 -7 13 -3 1.88 0.12
 -7 -13 3 2.06 0.12
 7 13 -3 1.96 0.11
 7 -13 3 2.13 0.12
 -7 13 3 2.22 0.12
 7 13 4 1.06 0.09
 -7 13 -4 0.96 0.09
 -7 -13 4 0.98 0.09
 -7 13 4 0.91 0.08
 7 13 -4 0.97 0.08
 7 -13 4 0.85 0.09
 7 14 0 0.74 0.07
 -7 14 0 0.81 0.08
 7 -14 0 0.73 0.08
 7 -14 -1 1.19 0.09
 -7 -14 1 1.13 0.09
 7 14 1 1.3 0.09
 -7 14 -1 1.22 0.09
 7 -14 1 1.19 0.09
 -7 14 1 1.31 0.09
 7 14 -1 1.37 0.09
 -7 14 -2 4.3 0.19
 7 14 2 4.54 0.19
 7 -14 -2 4.36 0.18
 -7 -14 2 4.37 0.19
 -7 14 2 4.63 0.19
 7 -14 2 4.36 0.19
 7 14 -2 4.44 0.18
 -7 14 -3 5.09 0.21
 7 14 3 5.06 0.2
 -7 -14 3 5 0.21
 7 -14 3 4.95 0.21
 7 14 -3 5.08 0.2
 -7 14 3 5.03 0.2
 8 0 0 40.16 1.08
 -8 0 0 39.15 0.99
 8 0 0 38.97 1.06
 -8 0 -1 13.17 0.34
 8 0 1 13.26 0.37
 -8 0 1 13.08 0.37
 8 0 1 13.57 0.37
 8 0 -1 13.16 0.37
 8 0 -1 13.18 0.38
 8 0 -2 3.64 0.13
 8 0 -2 3.79 0.1
 -8 0 -2 3.95 0.12
 -8 0 2 3.93 0.13
 8 0 2 4.32 0.13
 8 0 2 4.1 0.12
 -8 0 -3 36.44 0.94
 8 0 3 36.52 0.98
 8 0 -3 36.05 0.92
 -8 0 3 37.17 1
 8 0 3 37.07 1.01
 8 0 -4 7.71 0.25
 -8 0 4 8.07 0.25
 8 0 -4 8.19 0.22
 8 0 4 7.69 0.25
 8 0 4 8.09 0.22
 -8 0 -4 7.71 0.23
 -8 0 -5 16.65 0.49
 -8 0 5 18.54 0.51
 8 0 -5 18.3 0.47
 8 0 5 17.53 0.52
 -8 0 6 9.3 0.29
 -8 0 6 9.09 0.3
 8 0 -6 9.36 0.26
 8 0 6 9.07 0.29
 -8 0 -6 8.82 0.28
 8 0 7 4.02 0.16
 -8 0 -7 4.04 0.16
 -8 0 7 3.97 0.16
 -8 0 7 3.88 0.15
 -8 0 8 3.91 0.17
 -8 0 -8 3.76 0.16
 8 0 8 3.83 0.16
 -8 0 8 3.69 0.15
 8 0 9 10.07 0.36
 -8 0 9 11.55 0.38
 -8 0 -9 11.55 0.36
 8 -1 0 33.27 0.91
 -8 1 0 33.43 0.84
 8 1 0 31.2 0.91
 8 -1 0 33.51 0.9
 -8 -1 0 33.76 0.9
 8 1 0 33.81 0.9
 -8 -1 0 33.66 0.83
 -8 1 -1 14.22 0.37
 8 -1 -1 14.78 0.4
 8 1 1 14.22 0.39
 -8 -1 1 13.72 0.39
 8 1 1 14.01 0.39
 8 -1 -1 13.32 0.4
 -8 -1 -1 14.55 0.38
 8 1 -1 14.2 0.4
 -8 1 1 13.15 0.35
 -8 -1 -1 14.67 0.36
 8 -1 1 13.56 0.39
 8 -1 1 13.89 0.4
 8 -1 -2 28.88 0.74
 -8 -1 2 28.59 0.8
 8 -1 -2 31.04 0.82
 8 1 2 28.71 0.8
 8 -1 -2 28.54 0.8
 -8 1 -2 30.18 0.75
 8 1 2 29.76 0.78
 8 -1 2 29.03 0.79
 8 1 -2 29.38 0.73
 -8 1 2 28.72 0.8
 -8 -1 -2 29.57 0.75
 8 1 -2 29.1 0.81
 8 -1 2 28.59 0.81
 8 1 3 20.24 0.54
 8 -1 -3 18.59 0.49
 8 1 3 19.29 0.51
 -8 -1 3 19.13 0.54
 -8 1 -3 18.94 0.51
 8 -1 -3 18.91 0.55
 8 -1 -3 18.25 0.54
 -8 1 3 19.46 0.54
 -8 -1 -3 19.19 0.51
 8 -1 3 20.02 0.55
 8 1 -3 18.64 0.55
 8 1 -3 19.18 0.49
 8 -1 3 19.48 0.52
 8 1 4 9.69 0.29
 8 -1 -4 9.46 0.3
 8 -1 -4 9.74 0.26
 -8 1 -4 9.37 0.28
 -8 -1 4 9.57 0.29
 -8 1 4 9.48 0.29
 8 -1 4 9.83 0.27
 8 1 -4 9.44 0.3
 -8 -1 -4 9.54 0.28
 8 1 -4 10.24 0.26
 8 -1 4 9.47 0.29
 8 -1 -5 2.34 0.11
 8 1 5 2.37 0.1
 -8 -1 5 2.17 0.1
 -8 -1 5 2.17 0.1
 -8 1 -5 2.33 0.1
 8 -1 -5 2.42 0.08
 8 1 -5 2.43 0.08
 -8 -1 -5 2.19 0.1
 -8 1 5 2.32 0.1
 8 -1 5 2.28 0.08
 -8 1 5 2.14 0.1
 8 -1 5 2.22 0.1
 -8 -1 6 8.36 0.28
 -8 -1 6 8.22 0.27
 -8 1 -6 8.72 0.27
 8 -1 -6 8.54 0.25
 8 1 6 8.44 0.27
 8 1 -6 8.62 0.25
 -8 1 6 8.3 0.27
 8 -1 6 8.81 0.28
 -8 -1 -6 8.46 0.27
 -8 1 6 8.56 0.28
 -8 -1 7 4.82 0.19
 -8 -1 7 4.63 0.17
 8 1 7 4.58 0.18
 -8 1 -7 4.35 0.17
 8 -1 7 4.64 0.18
 -8 -1 -7 4.51 0.17
 -8 1 7 4.62 0.17
 -8 1 7 4.9 0.19
 -8 -1 8 4.35 0.17
 8 1 8 4.05 0.17
 -8 -1 8 4.44 0.18
 -8 1 -8 4.49 0.18
 -8 -1 -8 4.48 0.18
 -8 1 8 4.32 0.18
 -8 1 8 4.13 0.16
 8 -1 8 4.48 0.18
 -8 -1 9 0.38 0.06
 -8 1 -9 0.42 0.07
 8 1 9 0.56 0.07
 -8 -1 -9 0.5 0.07
 -8 1 9 0.45 0.07
 8 -1 9 0.5 0.07
 -8 -2 0 100.28 2.72
 8 -2 0 109.59 2.74
 8 2 0 97.39 2.76
 -8 2 0 102.07 2.58
 8 -2 0 105.89 2.77
 -8 -2 0 98.03 2.57
 -8 2 -1 7.46 0.2
 8 2 1 7.56 0.21
 -8 -2 1 7.15 0.22
 8 -2 -1 7.63 0.22
 8 -2 -1 7.28 0.22
 8 2 -1 7.48 0.19
 -8 -2 -1 7.6 0.2
 8 -2 1 7.54 0.22
 -8 -2 -1 7.54 0.21
 8 -2 1 7.34 0.22
 8 2 -1 7.2 0.22
 -8 2 1 7.42 0.2
 8 -2 -2 21.77 0.56
 8 -2 -2 21.77 0.62
 8 -2 -2 21.21 0.62
 -8 2 -2 21.69 0.58
 8 2 2 22.1 0.61
 -8 -2 2 21.78 0.61
 8 -2 2 22.8 0.61
 -8 -2 -2 22.31 0.59
 8 2 -2 21.75 0.56
 -8 -2 -2 22.02 0.57
 8 2 -2 22.98 0.62
 -8 2 2 21.8 0.56
 8 -2 2 23.67 0.62
 -8 -2 3 6.08 0.19
 -8 -2 3 6.02 0.19
 -8 2 -3 5.81 0.18
 8 -2 -3 5.83 0.19
 8 -2 -3 5.68 0.19
 8 2 3 6.15 0.18
 8 -2 -3 5.89 0.16
 -8 2 3 5.86 0.19
 8 -2 3 5.93 0.19
 8 2 -3 6.05 0.16
 8 2 -3 6.02 0.19
 -8 -2 -3 5.8 0.18
 8 -2 3 6.06 0.18
 8 -2 -4 3.57 0.11
 -8 2 -4 3.3 0.12
 8 -2 -4 3.15 0.12
 8 2 4 3.56 0.12
 8 -2 -4 3.22 0.13
 8 2 -4 3.51 0.1
 -8 2 4 3.33 0.12
 8 -2 4 3.37 0.13
 -8 -2 -4 3.19 0.12
 8 -2 4 3.45 0.11
 8 2 5 2.23 0.09
 -8 -2 5 2.09 0.1
 8 -2 -5 2.32 0.08
 -8 2 -5 2.21 0.1
 8 -2 -5 2.25 0.1
 -8 2 5 2.33 0.1
 8 -2 5 2.13 0.08
 -8 -2 -5 2.12 0.1
 8 2 -5 2.3 0.08
 8 -2 5 2.3 0.1
 8 2 6 2.66 0.11
 -8 -2 6 2.58 0.12
 8 -2 -6 2.72 0.1
 -8 -2 6 2.6 0.12
 -8 2 -6 2.44 0.11
 8 -2 6 2.48 0.12
 -8 -2 -6 2.52 0.11
 -8 2 6 2.58 0.12
 8 2 -6 2.56 0.1
 -8 2 6 2.57 0.11
 -8 -2 7 0.61 0.06
 8 2 7 0.75 0.06
 -8 2 -7 0.69 0.07
 -8 -2 7 0.7 0.06
 -8 -2 -7 0.71 0.06
 -8 2 7 0.71 0.07
 -8 2 7 0.68 0.06
 8 -2 7 0.81 0.07
 -8 -2 8 0.41 0.05
 8 2 8 0.45 0.06
 -8 -2 8 0.45 0.06
 -8 2 -8 0.43 0.06
 -8 2 8 0.45 0.06
 8 -2 8 0.49 0.06
 -8 -2 -8 0.39 0.06
 8 2 9 0.47 0.06
 -8 -2 9 0.53 0.07
 -8 2 -9 0.75 0.08
 8 -2 9 0.5 0.07
 -8 2 9 0.6 0.07
 -8 -2 -9 0.51 0.07
 -8 -3 0 40.97 1.1
 8 -3 0 40.12 1.1
 8 3 0 41.11 1.11
 -8 3 0 40.93 1.03
 8 -3 0 39.41 1.12
 -8 -3 0 41.64 1.03
 -8 3 -1 37.2 0.94
 -8 -3 1 37.31 1
 8 3 1 36.95 1
 8 -3 -1 38.25 1.01
 8 -3 -1 34.41 1.02
 8 3 -1 36.72 1.01
 -8 -3 -1 37.11 0.94
 -8 3 1 36.21 0.93
 8 -3 1 37.49 1
 -8 -3 -1 36.93 0.99
 8 -3 1 37.61 1.02
 8 3 -1 36.65 0.93
 8 -3 -2 6.48 0.21
 8 3 2 6.46 0.19
 -8 3 -2 6.69 0.19
 8 -3 -2 6.84 0.21
 -8 -3 2 6.48 0.2
 8 -3 2 6.68 0.2
 8 3 -2 6.64 0.18
 8 3 -2 6.59 0.2
 -8 -3 -2 6.74 0.19
 8 -3 2 6.3 0.21
 -8 -3 -2 6.52 0.18
 -8 3 2 6.5 0.18
 -8 -3 3 1.53 0.07
 8 3 3 1.46 0.06
 -8 -3 3 1.39 0.07
 8 -3 -3 1.35 0.07
 8 -3 -3 1.46 0.07
 8 -3 -3 1.42 0.05
 8 3 -3 1.4 0.05
 -8 -3 -3 1.35 0.06
 8 -3 3 1.5 0.06
 8 -3 3 1.43 0.07
 8 -3 -4 9.77 0.32
 8 -3 -4 10.97 0.29
 -8 -3 4 10.78 0.32
 8 -3 -4 10.03 0.31
 -8 3 -4 9.89 0.3
 -8 -3 4 10.55 0.32
 8 3 4 10.49 0.3
 -8 -3 -4 10.22 0.3
 -8 3 4 10.51 0.31
 8 -3 4 10.62 0.31
 8 -3 4 10.49 0.32
 8 3 -4 10.62 0.28
 8 -3 -5 11.62 0.31
 8 -3 -5 11.13 0.35
 8 -3 -5 11.1 0.34
 -8 3 -5 10.79 0.33
 8 3 5 11.3 0.34
 -8 -3 5 11.09 0.35
 8 -3 5 11.33 0.35
 -8 3 5 11.45 0.34
 8 -3 5 11.49 0.33
 -8 -3 -5 11.09 0.33
 8 3 -5 11.68 0.31
 8 3 6 0.46 0.04
 8 -3 -6 0.47 0.04
 -8 -3 6 0.43 0.05
 -8 -3 6 0.5 0.05
 -8 3 -6 0.5 0.05
 -8 3 6 0.41 0.05
 8 -3 6 0.48 0.05
 -8 3 6 0.51 0.05
 -8 -3 -6 0.48 0.05
 8 3 7 0.85 0.06
 -8 -3 7 0.8 0.07
 -8 3 -7 0.77 0.07
 -8 -3 7 0.83 0.07
 -8 3 7 0.91 0.07
 8 -3 7 0.86 0.07
 -8 3 7 0.76 0.06
 -8 -3 -7 0.63 0.07
 -8 -3 8 1.6 0.1
 -8 -3 8 1.45 0.1
 -8 3 -8 1.77 0.11
 8 -3 8 1.4 0.1
 -8 -3 -8 1.54 0.1
 -8 3 8 1.43 0.1
 -8 -3 9 2.91 0.14
 -8 -3 9 2.86 0.15
 -8 3 -9 2.83 0.14
 -8 3 9 2.93 0.15
 -8 -3 -9 2.76 0.14
 8 -3 9 3.15 0.15
 -8 -4 0 1.06 0.05
 8 4 0 1 0.04
 -8 -4 0 1.03 0.04
 8 -4 0 0.98 0.05
 8 -4 0 1.1 0.05
 -8 4 0 1 0.04
 8 -4 -1 2.82 0.1
 8 4 1 2.6 0.08
 -8 4 -1 2.6 0.09
 -8 -4 1 2.52 0.09
 8 -4 -1 2.56 0.1
 -8 4 1 2.62 0.09
 8 4 -1 2.71 0.09
 -8 -4 -1 2.7 0.09
 -8 -4 -1 2.75 0.09
 8 4 -1 2.78 0.08
 8 -4 1 2.55 0.1
 8 -4 1 2.65 0.1
 -8 -4 2 4.48 0.14
 8 -4 -2 4.31 0.15
 8 -4 -2 4.52 0.15
 -8 -4 2 4.52 0.15
 8 4 2 4.5 0.13
 -8 -4 -2 4.31 0.14
 -8 4 2 4.55 0.13
 8 -4 2 4.46 0.15
 -8 -4 -2 4.5 0.13
 8 4 -2 4.38 0.13
 8 -4 -3 11.3 0.33
 -8 4 -3 11.18 0.31
 -8 -4 3 10.99 0.33
 8 -4 -3 10.77 0.3
 8 -4 -3 10.86 0.33
 -8 -4 3 10.85 0.33
 8 4 3 10.95 0.31
 8 4 -3 11.23 0.3
 -8 -4 -3 11 0.31
 8 -4 3 11.37 0.33
 8 -4 3 10.75 0.33
 8 -4 -4 0.16 0.03
 -8 4 -4 0.14 0.03
 8 4 4 0.09 0.02
 8 -4 -4 0.13 0.02
 -8 -4 4 0.05 0.03
 -8 -4 4 0.09 0.03
 8 -4 -4 0.08 0.03
 -8 -4 -4 0.14 0.03
 8 4 -4 0.15 0.02
 8 -4 4 0.12 0.03
 8 -4 4 0.09 0.03
 8 -4 -5 17.29 0.52
 -8 -4 5 17.67 0.52
 -8 -4 5 17.37 0.52
 8 -4 -5 18.04 0.48
 -8 4 -5 17.37 0.49
 8 4 5 18.24 0.51
 8 -4 -5 18.06 0.52
 8 4 -5 18.58 0.47
 8 -4 5 17.01 0.53
 -8 4 5 18.22 0.51
 8 -4 5 17.49 0.51
 -8 -4 -5 17.53 0.49
 8 -4 -6 4.02 0.14
 -8 -4 6 3.99 0.16
 -8 4 -6 3.79 0.15
 8 -4 -6 4.19 0.16
 -8 -4 6 3.78 0.16
 8 -4 6 3.97 0.14
 8 -4 6 4.12 0.16
 -8 4 6 4.07 0.16
 -8 4 6 4.03 0.15
 -8 -4 -6 4.03 0.15
 -8 4 -7 3.67 0.16
 -8 -4 7 4.15 0.16
 -8 -4 7 3.87 0.17
 -8 4 7 4.05 0.15
 8 -4 7 3.99 0.17
 -8 -4 -7 3.62 0.15
 -8 4 7 3.77 0.16
 -8 -4 8 1.73 0.11
 -8 -4 8 1.67 0.1
 -8 4 -8 1.72 0.1
 -8 -4 -8 1.64 0.1
 -8 4 8 1.53 0.1
 8 -4 8 1.85 0.11
 -8 -4 9 2.38 0.13
 -8 -4 9 2.26 0.13
 -8 4 -9 2.15 0.13
 -8 4 9 2.46 0.13
 8 -4 9 2.24 0.13
 -8 -4 -9 2.42 0.13
 8 -5 0 0.03 0.02
 8 5 0 0.04 0.02
 -8 5 0 0 0.01
 -8 -5 0 0.02 0.01
 8 -5 0 0 0.01
 -8 -5 0 0 0.01
 -8 -5 0 0.04 0.02
 -8 -5 1 3.98 0.13
 8 -5 -1 3.82 0.14
 -8 5 -1 3.97 0.13
 -8 -5 1 3.95 0.12
 8 -5 -1 3.81 0.13
 -8 5 1 4.01 0.12
 -8 -5 -1 3.79 0.12
 8 -5 1 3.76 0.14
 8 5 -1 3.89 0.12
 -8 -5 -1 4.03 0.12
 8 -5 1 3.97 0.14
 -8 -5 2 22.34 0.61
 -8 -5 2 22.29 0.61
 -8 5 -2 21.15 0.58
 8 -5 -2 20.98 0.61
 8 -5 -2 21.19 0.62
 8 5 -2 21.94 0.57
 -8 -5 -2 22.4 0.59
 8 -5 2 20.99 0.62
 -8 -5 -2 21.74 0.57
 -8 5 2 22.07 0.57
 8 -5 2 22.38 0.61
 8 -5 -3 3.56 0.13
 -8 5 -3 3.45 0.13
 8 -5 -3 3.6 0.12
 -8 -5 3 3.94 0.13
 8 -5 -3 3.42 0.13
 8 -5 3 3.62 0.14
 8 5 -3 3.63 0.12
 -8 -5 -3 3.69 0.13
 -8 5 3 3.71 0.12
 8 -5 3 3.61 0.13
 8 -5 -4 10.72 0.32
 8 -5 -4 10.86 0.29
 -8 -5 4 10.27 0.32
 -8 -5 4 10.62 0.32
 8 -5 -4 10.17 0.32
 -8 5 -4 10.16 0.31
 8 5 -4 10.93 0.29
 -8 -5 -4 10.27 0.31
 8 -5 4 10.07 0.33
 8 -5 4 10.32 0.32
 8 -5 -5 2.22 0.09
 -8 -5 5 2.15 0.11
 8 -5 -5 2.17 0.1
 8 -5 -5 2.15 0.1
 -8 -5 5 2.1 0.1
 -8 5 -5 2.13 0.1
 8 -5 5 2.16 0.1
 8 5 -5 2.31 0.09
 -8 5 5 2.05 0.09
 8 -5 5 1.99 0.1
 -8 -5 -5 2.13 0.1
 8 -5 -6 1.05 0.07
 -8 -5 6 1.06 0.08
 8 -5 -6 1.07 0.06
 -8 5 -6 1.03 0.07
 8 -5 -6 0.95 0.07
 -8 -5 6 1.12 0.08
 -8 5 6 1.08 0.07
 -8 5 6 0.99 0.06
 -8 -5 -6 1.14 0.08
 8 -5 6 1.09 0.08
 8 -5 6 1.1 0.07
 -8 -5 7 2.81 0.13
 -8 5 -7 2.71 0.13
 -8 -5 7 2.67 0.13
 8 -5 7 2.73 0.13
 -8 -5 -7 2.69 0.13
 -8 5 7 2.46 0.12
 -8 -5 8 0.71 0.08
 -8 5 -8 0.76 0.08
 -8 -5 8 0.77 0.07
 -8 5 8 0.64 0.06
 -8 -5 -8 0.71 0.08
 8 -5 8 0.76 0.08
 -8 -5 9 0.76 0.08
 -8 -5 9 0.75 0.08
 -8 5 -9 0.84 0.08
 -8 5 9 0.71 0.07
 8 -5 9 0.71 0.08
 -8 -5 -9 0.81 0.08
 8 6 0 7.83 0.22
 8 -6 0 7.69 0.24
 -8 -6 0 7.89 0.24
 -8 6 0 7.73 0.23
 8 -6 0 8.01 0.25
 8 -6 -1 6.98 0.23
 -8 -6 1 7.56 0.21
 -8 6 -1 7.48 0.22
 8 -6 -1 7.3 0.23
 -8 -6 1 7.07 0.23
 8 -6 1 7.45 0.23
 8 -6 1 7.02 0.23
 -8 6 1 7.27 0.21
 8 6 -1 7.55 0.21
 -8 -6 -1 7.61 0.22
 -8 -6 -1 7.5 0.22
 -8 6 -2 4.8 0.16
 8 -6 -2 4.99 0.17
 -8 -6 2 4.86 0.17
 8 -6 -2 4.74 0.17
 -8 -6 2 5.17 0.16
 -8 -6 -2 5.26 0.15
 8 6 -2 5.14 0.15
 8 -6 2 5.05 0.17
 -8 -6 -2 5.14 0.16
 -8 6 2 5.12 0.16
 8 -6 2 5.4 0.17
 8 -6 -3 8.99 0.26
 -8 -6 3 9.71 0.28
 -8 6 -3 8.98 0.27
 8 -6 -3 9.17 0.29
 -8 -6 3 8.35 0.28
 8 -6 -3 9.22 0.28
 8 6 -3 9.16 0.26
 -8 -6 -3 9.32 0.27
 8 -6 3 9.06 0.28
 8 -6 3 9.28 0.29
 -8 6 3 9.31 0.26
 8 -6 -4 1.9 0.09
 8 -6 -4 1.83 0.09
 8 -6 -4 1.78 0.08
 -8 6 -4 1.81 0.09
 -8 -6 4 1.75 0.09
 -8 -6 4 1.73 0.08
 8 6 -4 1.76 0.07
 8 -6 4 1.8 0.09
 -8 -6 -4 1.89 0.09
 8 -6 -5 0.38 0.05
 8 -6 -5 0.43 0.05
 8 -6 -5 0.41 0.04
 -8 -6 5 0.52 0.06
 -8 -6 5 0.54 0.05
 -8 6 -5 0.48 0.05
 8 -6 5 0.45 0.05
 -8 6 5 0.53 0.05
 -8 -6 -5 0.45 0.05
 8 -6 5 0.46 0.05
 8 6 -5 0.43 0.04
 8 -6 -6 0.65 0.06
 8 -6 -6 0.53 0.05
 -8 -6 6 0.49 0.06
 -8 6 -6 0.54 0.06
 8 -6 -6 0.5 0.05
 -8 -6 6 0.55 0.06
 -8 6 6 0.55 0.05
 8 -6 6 0.58 0.05
 -8 6 6 0.52 0.05
 -8 -6 -6 0.5 0.06
 8 -6 6 0.5 0.06
 -8 -6 7 0.1 0.05
 -8 6 -7 0.03 0.02
 8 -6 -7 0.05 0.04
 -8 -6 7 0.14 0.05
 8 -6 7 0.14 0.05
 -8 6 7 0.07 0.04
 -8 -6 -7 0.12 0.05
 -8 6 -8 0.27 0.06
 -8 -6 8 0.3 0.06
 -8 -6 8 0.3 0.06
 -8 6 8 0.26 0.05
 -8 -6 -8 0.33 0.06
 8 -6 8 0.39 0.07
 -8 6 -9 0.48 0.07
 -8 -6 9 0.35 0.07
 -8 -6 9 0.37 0.06
 -8 -6 -9 0.51 0.07
 8 -6 9 0.56 0.08
 -8 7 0 4.38 0.14
 8 -7 0 4.25 0.16
 8 -7 0 4.33 0.15
 8 7 0 4.34 0.14
 -8 -7 0 4.31 0.15
 8 7 1 11.83 0.33
 8 -7 -1 11.08 0.36
 -8 7 -1 11.94 0.34
 -8 -7 1 12.19 0.36
 8 -7 -1 12.11 0.36
 8 7 -1 12.04 0.33
 -8 -7 -1 12.01 0.33
 8 -7 1 11.83 0.36
 8 -7 1 11.86 0.36
 -8 -7 -1 12.24 0.34
 -8 7 1 12.26 0.34
 8 -7 -2 0.78 0.05
 -8 -7 2 0.87 0.04
 8 -7 -2 0.74 0.05
 -8 -7 2 0.79 0.06
 -8 7 -2 0.75 0.05
 -8 -7 -2 0.76 0.05
 8 7 -2 0.82 0.05
 8 -7 2 0.76 0.06
 -8 -7 -2 0.83 0.04
 8 -7 2 0.72 0.05
 -8 7 2 0.67 0.05
 -8 7 -3 3.08 0.12
 8 -7 -3 3.33 0.12
 -8 -7 3 3.2 0.12
 8 -7 -3 3.07 0.12
 -8 -7 3 2.81 0.13
 8 -7 3 2.82 0.12
 8 7 -3 3.25 0.11
 -8 -7 -3 3.14 0.12
 -8 7 3 3.04 0.11
 8 -7 3 2.97 0.12
 -8 7 -4 3.8 0.15
 8 -7 -4 4.2 0.14
 -8 -7 4 3.99 0.16
 8 -7 -4 3.99 0.15
 8 -7 -4 4.27 0.15
 -8 -7 4 4.13 0.15
 -8 -7 -4 4.07 0.15
 8 -7 4 4.14 0.16
 -8 7 4 4.06 0.14
 8 7 -4 4.16 0.14
 8 -7 4 4.05 0.16
 8 -7 -5 3.22 0.13
 8 -7 -5 3.26 0.13
 -8 7 -5 3.44 0.14
 -8 -7 5 3.5 0.14
 8 -7 -5 3.04 0.12
 -8 -7 5 3.38 0.15
 -8 -7 -5 3.38 0.14
 8 7 -5 3.14 0.12
 8 -7 5 3.24 0.14
 8 -7 5 3.38 0.14
 -8 7 -6 2.9 0.13
 8 -7 -6 2.88 0.13
 -8 -7 6 2.88 0.14
 8 -7 -6 2.88 0.12
 -8 -7 6 2.93 0.13
 8 -7 6 2.75 0.13
 8 -7 6 3.06 0.14
 -8 -7 -6 3.07 0.13
 -8 7 6 2.74 0.12
 -8 -7 7 3.79 0.17
 8 -7 -7 3.64 0.15
 -8 -7 7 4.22 0.18
 -8 7 -7 4.1 0.17
 8 -7 7 3.87 0.17
 -8 -7 -7 4.07 0.17
 8 -7 7 3.65 0.16
 -8 7 -8 2.6 0.14
 -8 -7 8 2.77 0.14
 -8 -7 8 2.75 0.14
 8 -7 8 2.55 0.14
 -8 -7 -8 2.39 0.13
 8 -8 0 10.92 0.31
 8 8 0 10.28 0.3
 -8 8 0 10.24 0.3
 8 -8 0 9.92 0.32
 -8 -8 0 10.06 0.31
 -8 -8 1 20.7 0.6
 8 -8 -1 20.99 0.61
 8 8 1 20.66 0.57
 -8 8 -1 20.39 0.57
 8 -8 -1 21.87 0.6
 -8 -8 -1 22.02 0.59
 8 -8 1 20.47 0.61
 -8 8 1 21 0.57
 8 -8 1 20.96 0.6
 8 8 -1 21.27 0.56
 8 -8 -2 10.2 0.3
 -8 8 -2 9.7 0.29
 8 -8 -2 9.64 0.31
 -8 -8 2 9.2 0.3
 8 -8 2 9.14 0.31
 -8 -8 -2 9.7 0.29
 8 8 -2 10.08 0.28
 -8 8 2 9.77 0.29
 8 -8 2 9.6 0.3
 -8 -8 3 8.23 0.27
 -8 -8 3 8.11 0.26
 8 -8 -3 8.16 0.26
 -8 8 -3 8.15 0.26
 8 -8 -3 7.79 0.27
 8 -8 3 8.29 0.27
 8 8 -3 8.24 0.25
 8 -8 3 8.45 0.27
 -8 -8 -3 8.27 0.26
 -8 8 3 8.51 0.25
 -8 -8 4 3.92 0.16
 -8 8 -4 3.76 0.15
 -8 -8 4 4.09 0.15
 8 -8 -4 3.82 0.15
 8 -8 -4 4.01 0.15
 8 -8 4 4.05 0.16
 8 -8 4 4.2 0.16
 8 8 -4 3.8 0.14
 -8 -8 -4 3.85 0.15
 -8 8 4 4.1 0.14
 -8 -8 5 8.88 0.29
 -8 -8 5 9.3 0.31
 8 -8 -5 8.81 0.27
 8 -8 -5 8.86 0.29
 -8 8 -5 8.92 0.29
 -8 8 5 8.89 0.27
 8 -8 5 9.03 0.3
 -8 -8 -5 9.56 0.29
 8 -8 5 9.23 0.3
 8 8 -5 8.79 0.27
 -8 -8 6 0.02 0.02
 8 -8 -6 0.06 0.04
 -8 8 -6 0.09 0.05
 -8 -8 6 0.09 0.04
 8 -8 6 0.03 0.02
 -8 -8 -6 0.07 0.04
 8 -8 6 0.01 0.02
 -8 -8 7 11.23 0.38
 -8 8 -7 12.12 0.37
 -8 -8 7 11.8 0.39
 8 -8 -7 11.15 0.36
 8 -8 7 12.13 0.39
 -8 -8 -7 11.69 0.37
 8 -8 7 11.25 0.37
 -8 -8 8 3.01 0.15
 -8 8 -8 2.91 0.15
 -8 -8 8 3.17 0.15
 -8 -8 -8 2.88 0.14
 8 -8 8 3.02 0.16
 -8 -9 0 0.26 0.04
 8 9 0 0.26 0.04
 -8 9 0 0.21 0.04
 8 -9 0 0.17 0.04
 8 -9 0 0.26 0.04
 8 9 1 1.4 0.08
 8 -9 -1 1.49 0.08
 -8 -9 1 1.48 0.08
 8 -9 -1 1.54 0.07
 -8 9 -1 1.4 0.08
 8 9 -1 1.48 0.08
 -8 9 1 1.45 0.08
 -8 -9 -1 1.5 0.07
 8 -9 1 1.32 0.08
 8 -9 1 1.45 0.07
 -8 9 -2 1.08 0.07
 8 -9 -2 1.11 0.07
 -8 -9 2 1.15 0.07
 8 9 2 1.14 0.07
 8 -9 -2 1.11 0.06
 -8 -9 -2 1.12 0.07
 8 9 -2 1.08 0.07
 -8 9 2 1.17 0.07
 8 -9 2 1.21 0.08
 8 -9 2 1.21 0.07
 8 -9 -3 2.71 0.12
 -8 9 -3 2.5 0.12
 -8 -9 3 2.7 0.12
 -8 9 3 2.61 0.11
 8 -9 3 2.64 0.12
 8 9 -3 2.74 0.11
 -8 -9 -3 2.62 0.12
 8 -9 3 2.61 0.12
 -8 9 -4 0.4 0.05
 -8 -9 4 0.38 0.05
 8 -9 -4 0.45 0.05
 -8 -9 -4 0.46 0.06
 -8 9 4 0.46 0.05
 8 -9 4 0.43 0.06
 8 -9 4 0.46 0.05
 8 9 -4 0.43 0.05
 -8 9 -5 4.48 0.18
 -8 -9 5 4.63 0.19
 8 -9 5 4.42 0.18
 -8 -9 -5 4.57 0.18
 -8 9 5 4.47 0.16
 8 -9 5 4.54 0.18
 8 9 -5 3.99 0.17
 -8 -9 6 0.16 0.05
 -8 9 -6 0.24 0.06
 -8 -9 6 0.21 0.05
 8 -9 -6 0.19 0.04
 8 -9 6 0.26 0.06
 -8 -9 -6 0.23 0.05
 8 -9 6 0.19 0.05
 -8 9 6 0.12 0.04
 -8 9 -7 0.46 0.07
 -8 -9 7 0.34 0.06
 -8 -9 7 0.37 0.07
 -8 9 7 0.36 0.06
 -8 -9 -7 0.4 0.06
 8 -9 7 0.56 0.07
 8 -9 7 0.39 0.06
 8 -10 0 0 0.01
 8 10 0 0 0.01
 8 -10 0 0 0.01
 -8 10 0 -0.01 0.01
 -8 -10 0 -0.01 0.01
 -8 -10 1 14.27 0.44
 8 10 1 14.05 0.41
 -8 10 -1 14.42 0.42
 8 -10 -1 14.07 0.44
 8 -10 1 15.08 0.45
 8 -10 1 14.79 0.43
 -8 -10 -1 14.23 0.43
 8 10 -1 14.63 0.41
 -8 10 1 14.88 0.42
 8 10 2 4.36 0.16
 8 -10 -2 4.38 0.17
 -8 -10 2 4.43 0.17
 -8 10 -2 4.51 0.17
 8 -10 2 4.31 0.16
 -8 10 2 4.47 0.16
 8 -10 2 4.45 0.18
 8 10 -2 4.55 0.16
 -8 -10 3 0.37 0.05
 8 10 3 0.39 0.05
 8 -10 -3 0.38 0.05
 -8 10 -3 0.34 0.05
 8 10 -3 0.42 0.05
 8 -10 3 0.36 0.05
 -8 10 3 0.36 0.05
 8 -10 3 0.33 0.06
 -8 -10 -3 0.41 0.05
 -8 -10 4 5.51 0.21
 -8 10 -4 5.23 0.2
 8 -10 -4 5 0.19
 8 -10 4 5.61 0.21
 8 -10 4 5.03 0.19
 8 10 -4 4.98 0.18
 -8 10 4 5.14 0.19
 -8 -10 -4 5.47 0.19
 -8 -10 5 1.33 0.1
 -8 10 -5 1.26 0.09
 -8 -10 -5 1.37 0.09
 -8 10 5 1.27 0.08
 8 -10 5 1.28 0.09
 8 -10 5 1.35 0.09
 -8 10 -6 0.02 0.02
 -8 -10 6 0.09 0.06
 -8 10 6 0.1 0.04
 8 -10 6 0.02 0.02
 -8 -10 -6 0.01 0.02
 8 -10 6 0.02 0.02
 -8 -10 7 1.85 0.12
 -8 10 -7 1.85 0.12
 -8 -10 -7 1.78 0.11
 -8 10 7 1.86 0.1
 8 -10 7 1.69 0.11
 8 -10 7 1.92 0.12
 -8 11 0 9.3 0.29
 8 -11 0 8.97 0.3
 -8 -11 0 8.45 0.28
 8 11 0 8.73 0.28
 8 -11 -1 2.17 0.11
 8 11 1 2.17 0.11
 -8 11 -1 2.25 0.11
 -8 -11 1 2.05 0.11
 -8 11 1 2.24 0.11
 8 11 -1 2.26 0.11
 8 -11 1 2.31 0.12
 8 11 2 0.02 0.01
 8 -11 -2 0.03 0.02
 -8 -11 2 0.09 0.04
 -8 11 -2 0.07 0.04
 8 -11 2 0.06 0.03
 8 -11 2 0.03 0.02
 8 11 -2 0.15 0.04
 -8 11 2 0.09 0.04
 8 -11 -3 3.57 0.15
 -8 11 -3 4.07 0.16
 8 11 3 3.75 0.15
 -8 -11 3 3.93 0.16
 8 -11 3 3.42 0.15
 8 -11 3 3.78 0.16
 8 11 -3 3.62 0.14
 -8 11 3 3.65 0.15
 -8 -11 -3 3.6 0.15
 -8 11 -4 6.07 0.22
 8 -11 -4 5.58 0.22
 8 11 4 6.47 0.22
 -8 -11 4 6.12 0.23
 -8 11 4 5.93 0.21
 8 -11 4 5.81 0.22
 -8 -11 -4 6.35 0.22
 8 -11 4 6.08 0.23
 8 11 -4 5.34 0.2
 -8 11 -5 1.12 0.09
 -8 -11 5 1.15 0.09
 -8 -11 -5 1.14 0.09
 -8 11 5 1.21 0.08
 8 -11 5 1.17 0.08
 8 -11 5 1.15 0.09
 -8 -11 6 0.73 0.08
 -8 11 -6 0.81 0.08
 8 -11 6 0.64 0.07
 -8 -11 -6 0.7 0.08
 8 -11 6 0.72 0.08
 -8 11 6 0.73 0.07
 -8 -12 0 0.27 0.05
 -8 12 0 0.34 0.06
 8 12 0 0.37 0.05
 8 -12 0 0.29 0.05
 8 12 1 0.25 0.05
 -8 -12 1 0.15 0.04
 -8 12 -1 0.2 0.05
 8 -12 -1 0.23 0.05
 -8 12 1 0.21 0.05
 8 12 -1 0.26 0.05
 8 -12 1 0.29 0.05
 8 -12 -2 3.15 0.14
 8 12 2 3.09 0.14
 -8 12 -2 3.29 0.15
 -8 -12 2 2.99 0.14
 -8 12 2 3.3 0.14
 8 12 -2 3.05 0.13
 8 -12 2 3.1 0.15
 8 12 3 2.1 0.11
 -8 12 -3 2.14 0.12
 -8 -12 3 2.1 0.12
 8 -12 -3 1.98 0.11
 -8 12 3 2.04 0.11
 8 12 -3 1.84 0.1
 8 -12 3 2.18 0.12
 -8 12 -4 1.26 0.1
 -8 -12 4 1.15 0.09
 8 12 4 1.42 0.09
 -8 12 4 1.28 0.09
 8 -12 4 1.26 0.1
 8 12 -4 1.18 0.08
 -8 -12 -4 1.16 0.09
 -8 -12 5 1.13 0.1
 -8 12 -5 1.31 0.1
 8 12 5 1.35 0.1
 -8 -12 -5 1.06 0.09
 -8 12 5 1.17 0.09
 8 -12 5 1.12 0.08
 8 -12 5 1.18 0.1
 8 13 0 0.76 0.07
 -8 13 0 0.82 0.08
 8 -13 0 0.77 0.08
 -8 -13 1 0.32 0.05
 8 -13 -1 0.35 0.06
 -8 13 -1 0.41 0.06
 8 13 1 0.29 0.06
 8 -13 1 0.31 0.06
 -8 13 1 0.31 0.06
 8 13 -1 0.36 0.06
 8 -13 -2 1.29 0.09
 -8 -13 2 1.24 0.09
 -8 13 -2 1.22 0.09
 8 13 2 1.27 0.09
 8 -13 2 1.32 0.1
 -8 13 2 1.3 0.09
 8 13 -2 1.16 0.08
 -8 -13 3 0.26 0.06
 8 -13 -3 0.36 0.06
 8 13 3 0.28 0.06
 -8 13 -3 0.25 0.06
 8 13 -3 0.25 0.05
 -8 13 3 0.29 0.06
 8 -13 3 0.35 0.06
 -8 -13 4 2.02 0.12
 8 13 4 2 0.12
 -8 13 -4 2 0.12
 8 -13 4 2.09 0.13
 -8 13 4 2.1 0.11
 8 14 0 1.33 0.09
 -8 14 0 1.33 0.1
 8 -14 0 1.26 0.1
 -8 14 -1 1.56 0.11
 -8 -14 1 1.52 0.1
 8 14 1 1.88 0.11
 8 -14 -1 1.68 0.11
 8 14 -1 1.67 0.11
 8 -14 1 1.58 0.11
 -8 14 1 1.88 0.11
 -8 -14 2 0.5 0.07
 8 -14 -2 0.66 0.07
 8 14 2 0.57 0.07
 -8 14 -2 0.64 0.08
 8 -14 2 0.58 0.07
 -8 14 2 0.51 0.07
 8 14 -2 0.57 0.07
 -8 14 -3 1.4 0.11
 -8 -14 3 1.4 0.1
 8 14 3 1.33 0.1
 -8 14 3 1.43 0.1
 8 14 -3 1.43 0.1
 9 0 0 -0.01 0.01
 -9 0 0 -0.02 0.01
 9 0 0 0 0.02
 9 0 -1 -0.03 0.01
 9 0 1 -0.03 0.01
 9 0 1 -0.01 0.01
 -9 0 1 -0.04 0.01
 -9 0 -1 -0.03 0
 9 0 -1 0.02 0.02
 -9 0 2 -0.01 0.01
 9 0 2 -0.01 0
 9 0 -2 0 0.01
 9 0 -2 0 0.01
 -9 0 -2 -0.01 0
 -9 0 3 -0.01 0.01
 9 0 3 0.05 0.02
 -9 0 -3 -0.01 0.01
 9 0 -3 0.03 0.02
 9 0 3 0 0.01
 9 0 -3 0.01 0.01
 -9 0 4 0.01 0.01
 9 0 4 0 0
 9 0 -4 0 0.01
 9 0 -4 0 0
 9 0 4 0 0.01
 -9 0 -4 0.01 0.01
 9 0 -5 0.09 0.04
 -9 0 5 0 0.01
 9 0 5 0.04 0.03
 -9 0 -5 0.01 0.01
 -9 0 5 0.01 0.01
 -9 0 6 -0.01 0.01
 -9 0 -6 -0.01 0.01
 9 0 6 0.01 0.01
 -9 0 6 0.04 0.03
 -9 0 7 -0.02 0.01
 9 0 7 0.05 0.04
 -9 0 7 0 0.01
 -9 0 -7 -0.02 0.01
 -9 0 8 0 0.02
 -9 0 8 0 0.01
 9 0 8 0 0.01
 -9 0 -8 -0.02 0.01
 -9 0 9 -0.01 0.02
 -9 0 -9 0.01 0.02
 9 0 9 0 0.02
 -9 -1 0 3.34 0.11
 -9 1 0 3.38 0.09
 9 1 0 3.36 0.11
 9 1 0 3.38 0.11
 9 -1 0 3.38 0.11
 -9 -1 0 3.32 0.09
 9 -1 0 3.41 0.11
 -9 1 -1 10.76 0.28
 9 -1 -1 11.25 0.31
 9 1 1 10.62 0.3
 9 -1 -1 9.89 0.31
 -9 -1 1 10.27 0.3
 9 1 1 10.21 0.3
 -9 1 1 10.23 0.27
 9 -1 1 10.58 0.31
 9 1 -1 11.02 0.31
 -9 -1 -1 11.1 0.28
 -9 -1 -1 10.94 0.3
 9 -1 1 10.33 0.3
 9 -1 -2 11.17 0.33
 -9 -1 2 11.44 0.33
 9 -1 -2 10.91 0.33
 9 1 2 11.41 0.32
 -9 1 -2 11.56 0.31
 9 1 2 11.24 0.31
 -9 1 2 11.16 0.33
 -9 1 2 10.68 0.29
 9 1 -2 11.19 0.33
 9 -1 2 11.39 0.32
 -9 -1 -2 11.72 0.3
 9 -1 2 11.49 0.33
 9 -1 -3 3.86 0.14
 9 -1 -3 3.9 0.14
 9 1 3 4.08 0.13
 9 1 3 4.04 0.11
 -9 1 -3 3.94 0.13
 9 -1 -3 3.89 0.11
 -9 -1 -3 3.93 0.13
 9 1 -3 4 0.11
 -9 1 3 3.93 0.14
 9 1 -3 3.69 0.14
 9 -1 3 3.87 0.14
 9 -1 3 4.02 0.12
 -9 -1 4 3.75 0.14
 9 1 4 3.78 0.13
 9 -1 -4 4.03 0.11
 -9 1 -4 3.78 0.13
 9 -1 -4 3.82 0.14
 -9 -1 4 3.8 0.14
 -9 1 4 3.82 0.14
 -9 -1 -4 3.99 0.13
 9 -1 4 3.86 0.12
 9 -1 4 3.81 0.14
 9 1 -4 3.98 0.11
 9 1 -4 3.82 0.14
 9 -1 -5 4.09 0.12
 -9 1 -5 3.75 0.14
 -9 -1 5 3.74 0.15
 9 -1 -5 3.65 0.15
 9 1 5 3.86 0.14
 -9 -1 5 3.73 0.14
 -9 1 5 3.79 0.14
 9 1 -5 4.02 0.12
 -9 -1 -5 3.79 0.14
 9 -1 5 3.75 0.14
 9 1 6 6.32 0.21
 -9 -1 6 6.04 0.22
 -9 1 -6 6.18 0.21
 -9 -1 6 6.06 0.21
 -9 1 6 6.02 0.21
 -9 -1 -6 5.99 0.21
 -9 1 6 6.2 0.22
 9 -1 6 6.2 0.22
 -9 -1 7 3.27 0.15
 -9 1 -7 3.22 0.14
 9 1 7 2.99 0.13
 -9 -1 7 3.12 0.14
 -9 1 7 3.35 0.15
 -9 1 7 3.18 0.13
 9 -1 7 3.24 0.14
 -9 -1 -7 3.22 0.14
 -9 1 -8 2.95 0.14
 9 1 8 3.04 0.14
 -9 -1 8 2.86 0.14
 -9 -1 8 2.91 0.13
 -9 1 8 2.92 0.13
 9 -1 8 2.97 0.14
 -9 -1 -8 3.07 0.14
 -9 1 8 3.05 0.15
 -9 1 -9 0.34 0.06
 9 1 9 0.44 0.06
 -9 -1 9 0.5 0.07
 -9 1 9 0.5 0.07
 -9 -1 -9 0.48 0.07
 9 -1 9 0.47 0.07
 -9 2 0 23.57 0.61
 9 2 0 24.75 0.66
 -9 -2 0 22.9 0.61
 -9 -2 0 24.09 0.65
 9 -2 0 24.87 0.67
 9 -2 0 23.33 0.66
 9 -2 -1 14.71 0.41
 -9 2 -1 13.96 0.37
 -9 -2 1 14.03 0.4
 9 -2 -1 13.53 0.4
 9 2 1 14.56 0.39
 -9 2 1 13.95 0.36
 -9 -2 -1 13.76 0.39
 9 2 -1 14.05 0.4
 9 2 -1 13.89 0.36
 9 -2 1 14.1 0.4
 9 -2 1 14.18 0.4
 -9 -2 -1 13.98 0.37
 9 -2 -2 2.09 0.09
 9 2 2 2.23 0.07
 9 -2 -2 2.12 0.09
 -9 -2 2 2.09 0.08
 -9 -2 -2 2.14 0.08
 -9 -2 -2 2.09 0.07
 9 2 -2 2.01 0.06
 9 -2 2 2.22 0.08
 9 -2 2 2.25 0.09
 -9 2 2 2.19 0.06
 9 2 -2 1.96 0.08
 -9 2 -3 1.65 0.07
 9 -2 -3 1.63 0.08
 9 2 3 1.61 0.07
 9 -2 -3 1.69 0.06
 -9 -2 3 1.51 0.07
 9 -2 -3 1.67 0.08
 9 -2 3 1.68 0.06
 9 2 -3 1.72 0.05
 -9 -2 -3 1.65 0.07
 -9 2 3 1.58 0.07
 9 -2 3 1.66 0.07
 9 -2 -4 11.05 0.33
 -9 -2 4 10.09 0.33
 -9 -2 4 10.68 0.33
 -9 2 -4 10.85 0.31
 9 -2 -4 10.78 0.33
 9 2 4 10.52 0.32
 9 -2 -4 11.14 0.29
 -9 2 4 10.55 0.32
 9 -2 4 10.91 0.31
 9 2 -4 10.54 0.33
 9 2 -4 11.06 0.29
 -9 -2 -4 11.02 0.31
 9 -2 4 10.72 0.33
 9 -2 -5 5.14 0.19
 9 2 5 5.31 0.18
 -9 2 -5 5.2 0.18
 9 -2 -5 5.46 0.16
 -9 -2 5 5.19 0.18
 -9 -2 5 5.13 0.19
 -9 2 5 5.29 0.18
 9 -2 5 5.27 0.16
 9 2 -5 5.42 0.16
 -9 -2 -5 5.24 0.18
 9 -2 5 4.91 0.18
 -9 2 -6 23.11 0.64
 -9 -2 6 22.99 0.69
 9 2 6 24.15 0.68
 -9 -2 6 23.68 0.68
 9 -2 6 23.63 0.69
 -9 2 6 23.53 0.67
 -9 -2 -6 23.29 0.64
 9 2 7 2.61 0.11
 -9 -2 7 2.52 0.12
 -9 -2 7 2.23 0.11
 -9 2 -7 2.22 0.12
 -9 2 7 2.31 0.12
 -9 2 7 2.32 0.11
 -9 -2 -7 2.27 0.11
 9 -2 7 2.44 0.12
 -9 -2 8 3.08 0.15
 -9 -2 8 3.17 0.14
 9 2 8 2.99 0.14
 -9 2 -8 3.07 0.14
 9 -2 8 3.09 0.15
 -9 2 8 3.14 0.15
 -9 -2 -8 3 0.14
 -9 2 -9 2.57 0.13
 -9 -2 9 2.8 0.13
 -9 -2 9 2.47 0.14
 -9 2 9 2.44 0.14
 9 -2 9 2.81 0.14
 -9 -2 -9 2.79 0.14
 -9 -3 0 3.1 0.09
 -9 -3 0 3.01 0.1
 9 3 0 3.13 0.1
 9 -3 0 3.02 0.11
 -9 3 0 2.94 0.09
 9 -3 0 2.82 0.11
 9 -3 -1 7.63 0.23
 -9 -3 1 7.15 0.22
 -9 3 -1 7.65 0.21
 9 3 1 7.31 0.21
 9 -3 -1 7.26 0.23
 9 -3 1 7.6 0.23
 9 3 -1 7.72 0.22
 9 3 -1 7.5 0.2
 -9 3 1 7.36 0.2
 -9 -3 -1 7.47 0.21
 -9 -3 -1 7.41 0.21
 9 -3 1 7.48 0.23
 -9 3 -2 11.67 0.31
 9 -3 -2 11.83 0.34
 -9 -3 2 10.83 0.33
 9 -3 -2 10.86 0.34
 9 3 2 11.42 0.32
 9 -3 2 11.05 0.34
 -9 3 2 11.24 0.3
 -9 -3 -2 11.46 0.31
 9 3 -2 11.77 0.33
 -9 -3 -2 10.96 0.31
 9 -3 2 11.13 0.33
 9 3 -2 11.36 0.29
 9 -3 -3 16.37 0.49
 9 -3 -3 16.76 0.45
 9 3 3 16.92 0.48
 -9 -3 3 16.94 0.49
 -9 -3 3 17.09 0.49
 9 -3 -3 16.86 0.5
 -9 3 -3 17.71 0.46
 9 -3 3 16.56 0.5
 9 -3 3 17.99 0.48
 9 3 -3 17.73 0.5
 9 3 -3 17.59 0.44
 -9 -3 -3 17.2 0.46
 9 -3 -4 4.52 0.16
 -9 3 -4 4.4 0.15
 9 -3 -4 4.56 0.17
 9 -3 -4 4.88 0.14
 -9 -3 4 4.51 0.16
 9 3 4 4.6 0.15
 -9 -3 4 4.35 0.16
 9 -3 4 4.7 0.15
 -9 -3 -4 4.69 0.16
 9 3 -4 4.81 0.14
 -9 3 4 4.59 0.16
 -9 3 -5 7.41 0.24
 9 3 5 7.72 0.24
 -9 -3 5 7.59 0.25
 -9 -3 5 7.28 0.25
 9 -3 -5 7.65 0.25
 9 -3 -5 7.83 0.26
 9 -3 -5 7.7 0.22
 -9 -3 -5 7.67 0.24
 9 -3 5 7.45 0.25
 9 3 -5 7.84 0.22
 9 -3 5 7.82 0.23
 -9 3 5 7.46 0.24
 -9 3 -6 1.5 0.09
 9 -3 -6 1.53 0.09
 -9 -3 6 1.66 0.09
 9 3 6 1.59 0.08
 -9 -3 6 1.59 0.09
 -9 -3 -6 1.54 0.09
 9 -3 6 1.52 0.09
 -9 3 6 1.66 0.08
 -9 3 6 1.63 0.09
 9 3 7 2.03 0.1
 -9 3 -7 2.04 0.11
 -9 -3 7 2.3 0.12
 -9 -3 7 2.44 0.12
 -9 -3 -7 2.38 0.12
 9 -3 7 2.09 0.11
 -9 3 7 2.23 0.11
 -9 3 7 2.13 0.1
 -9 3 -8 3.5 0.16
 -9 -3 8 3.57 0.16
 -9 -3 8 3.35 0.15
 -9 -3 -8 3.94 0.16
 9 -3 8 3.58 0.16
 -9 3 8 3.36 0.16
 -9 -3 9 1.07 0.09
 -9 -3 9 1.16 0.09
 -9 3 -9 1.1 0.09
 -9 3 9 1.28 0.09
 -9 -3 -9 0.9 0.09
 9 -3 9 1.08 0.09
 -9 -4 0 38.72 0.98
 -9 4 0 39.07 0.98
 9 4 0 36.98 1.05
 9 -4 0 38.43 1.06
 9 -4 0 38.62 1.05
 -9 -4 0 39.1 1.04
 9 -4 -1 0.86 0.05
 -9 -4 1 0.89 0.05
 -9 4 -1 0.95 0.05
 9 4 1 0.89 0.03
 9 -4 -1 0.94 0.05
 -9 -4 -1 0.87 0.04
 9 -4 1 0.9 0.05
 -9 4 1 0.97 0.04
 9 -4 1 0.89 0.05
 9 4 -1 0.97 0.04
 9 4 -1 1 0.04
 -9 -4 -1 0.9 0.04
 -9 -4 2 20.34 0.58
 9 -4 -2 20.53 0.59
 9 4 2 20.61 0.57
 9 -4 -2 20.34 0.58
 -9 -4 2 21 0.58
 -9 4 -2 20.45 0.55
 -9 4 2 21.14 0.54
 9 4 -2 20.07 0.58
 -9 -4 -2 21.34 0.55
 -9 -4 -2 21.02 0.56
 9 -4 2 20.79 0.58
 9 -4 2 20.36 0.59
 9 4 -2 20.78 0.53
 9 -4 -3 4.51 0.16
 9 -4 -3 4.84 0.14
 9 4 3 4.73 0.14
 -9 -4 3 4.78 0.17
 9 -4 -3 4.78 0.17
 -9 4 -3 4.86 0.16
 -9 -4 3 4.79 0.16
 -9 -4 -3 4.7 0.15
 9 -4 3 4.91 0.17
 -9 4 3 4.76 0.14
 9 -4 3 4.49 0.16
 9 4 -3 4.82 0.14
 -9 -4 4 9.43 0.3
 9 -4 -4 10.01 0.31
 9 4 4 9.77 0.28
 -9 -4 4 9.53 0.3
 9 -4 -4 9.6 0.3
 -9 4 -4 9.35 0.29
 9 -4 -4 10.06 0.27
 9 4 -4 10.18 0.27
 -9 4 4 9.81 0.3
 -9 -4 -4 9.63 0.29
 9 -4 4 9.75 0.29
 9 -4 4 9.44 0.31
 9 -4 -5 3.01 0.13
 9 4 5 3 0.11
 -9 4 -5 3.06 0.12
 -9 -4 5 2.97 0.13
 -9 -4 5 3.15 0.13
 9 -4 -5 3.13 0.11
 9 -4 -5 3.21 0.13
 9 -4 5 3.03 0.12
 -9 4 5 2.98 0.12
 9 -4 5 2.94 0.13
 9 -4 -6 4.03 0.16
 -9 -4 6 4.02 0.16
 9 -4 -6 3.73 0.13
 -9 4 -6 3.66 0.15
 -9 -4 6 3.82 0.16
 -9 4 6 3.83 0.15
 9 -4 6 3.86 0.16
 9 -4 6 3.85 0.14
 -9 4 6 3.88 0.15
 -9 4 -7 1.64 0.1
 -9 -4 7 1.65 0.1
 -9 -4 7 1.66 0.1
 -9 -4 -7 1.56 0.09
 -9 4 7 1.54 0.09
 -9 4 7 1.62 0.1
 9 -4 7 1.59 0.1
 -9 -4 8 1.28 0.1
 -9 -4 8 1.31 0.09
 -9 4 -8 1.31 0.09
 -9 4 8 1.36 0.09
 -9 -4 -8 1.31 0.09
 9 -4 8 1.4 0.1
 -9 -4 9 1.01 0.09
 -9 -4 9 1.03 0.09
 -9 4 -9 0.99 0.09
 9 -4 9 1.12 0.09
 -9 -4 -9 0.93 0.08
 -9 4 9 1.08 0.09
 9 -5 0 0.22 0.03
 -9 5 0 0.2 0.02
 9 -5 0 0.24 0.03
 9 5 0 0.18 0.02
 -9 -5 0 0.27 0.02
 9 5 0 0.23 0.02
 -9 -5 0 0.18 0.02
 -9 5 -1 11.74 0.32
 9 -5 -1 11.38 0.34
 -9 -5 1 11.25 0.33
 9 5 1 11.29 0.31
 -9 -5 1 11.73 0.32
 9 -5 -1 10.84 0.34
 -9 5 1 11.42 0.31
 9 -5 1 11.16 0.34
 9 -5 1 11.19 0.34
 -9 -5 -1 11.58 0.32
 -9 -5 -1 11.53 0.31
 9 5 -1 11.22 0.3
 9 -5 -2 8.56 0.27
 9 -5 -2 8.6 0.27
 -9 5 -2 8.8 0.25
 -9 -5 2 8.59 0.26
 -9 -5 2 8.23 0.26
 9 5 -2 8.96 0.24
 9 -5 2 8.19 0.26
 -9 5 2 8.63 0.24
 -9 -5 -2 9.13 0.25
 9 -5 2 7.98 0.27
 -9 -5 -2 9.1 0.24
 -9 5 -3 8.45 0.25
 -9 -5 3 8.13 0.25
 9 -5 -3 8.24 0.26
 9 -5 -3 8.45 0.23
 9 -5 -3 7.51 0.25
 -9 -5 3 7.7 0.26
 -9 5 3 8.13 0.23
 9 5 -3 8.54 0.23
 -9 -5 -3 8.18 0.24
 9 -5 3 8.05 0.26
 9 -5 3 7.8 0.25
 -9 -5 4 8.25 0.27
 -9 -5 4 8.13 0.26
 9 -5 -4 8.04 0.26
 -9 5 -4 8.02 0.25
 9 -5 -4 8.11 0.26
 9 -5 -4 7.93 0.23
 9 5 -4 8.42 0.23
 -9 -5 -4 8.06 0.25
 9 -5 4 7.89 0.26
 9 -5 4 8.17 0.26
 9 -5 -5 5.96 0.19
 -9 5 -5 5.79 0.2
 9 -5 -5 6.18 0.21
 -9 -5 5 6.18 0.21
 -9 -5 5 5.99 0.21
 9 -5 -5 6.18 0.21
 9 -5 5 6 0.22
 -9 -5 -5 6.07 0.2
 9 -5 5 5.9 0.2
 -9 5 5 6.15 0.21
 -9 5 -6 9.31 0.3
 9 -5 -6 8.91 0.27
 9 -5 -6 9.34 0.3
 -9 -5 6 9.24 0.31
 -9 -5 6 9.42 0.31
 9 -5 -6 9.63 0.31
 -9 -5 -6 9.64 0.3
 9 -5 6 9.26 0.29
 -9 5 6 9.14 0.29
 -9 5 6 9.16 0.3
 9 -5 6 9.3 0.31
 -9 -5 7 0.89 0.08
 -9 5 -7 0.91 0.08
 -9 -5 7 0.83 0.08
 -9 5 7 0.76 0.07
 9 -5 7 0.91 0.08
 -9 -5 -7 0.96 0.08
 -9 5 -8 2.85 0.14
 -9 -5 8 3.14 0.15
 -9 -5 8 3.35 0.16
 -9 -5 -8 3.03 0.15
 -9 5 8 3.06 0.14
 9 -5 8 3.41 0.16
 -9 -5 9 1.24 0.09
 -9 -5 9 1.35 0.1
 -9 5 -9 1.21 0.1
 9 -5 9 1.44 0.11
 -9 5 9 1.39 0.1
 -9 -5 -9 1.3 0.1
 -9 6 0 7.19 0.21
 9 -6 0 7.46 0.23
 9 -6 0 6.98 0.23
 -9 -6 0 7.22 0.22
 9 6 0 7.53 0.21
 9 -6 -1 6.92 0.24
 -9 6 -1 7.87 0.23
 -9 -6 1 7.73 0.22
 -9 -6 1 7.19 0.23
 9 -6 -1 7.86 0.24
 -9 -6 -1 7.76 0.22
 9 6 -1 7.74 0.22
 9 -6 1 7.11 0.24
 -9 6 1 7.83 0.22
 9 -6 1 7.07 0.24
 -9 -6 -1 7.91 0.22
 -9 -6 2 6.11 0.18
 9 -6 -2 5.53 0.19
 -9 6 -2 5.67 0.18
 9 -6 -2 5.67 0.19
 -9 -6 2 5.73 0.19
 -9 6 2 6.06 0.18
 -9 -6 -2 5.72 0.17
 9 -6 2 5.8 0.2
 9 6 -2 5.74 0.17
 9 -6 2 5.83 0.2
 -9 -6 -2 5.77 0.18
 -9 -6 3 7.27 0.22
 -9 -6 3 6.77 0.23
 -9 6 -3 6.67 0.22
 9 -6 -3 7.25 0.23
 9 -6 -3 6.75 0.23
 9 -6 3 7.18 0.23
 -9 6 3 6.99 0.21
 -9 -6 -3 6.97 0.22
 9 -6 3 6.87 0.23
 9 6 -3 7.24 0.2
 9 -6 -4 2.81 0.12
 9 -6 -4 2.86 0.1
 -9 -6 4 2.95 0.12
 -9 -6 4 2.85 0.12
 9 -6 -4 2.72 0.12
 -9 6 -4 2.73 0.12
 -9 6 4 2.83 0.1
 9 6 -4 2.79 0.1
 -9 -6 -4 2.78 0.11
 9 -6 4 2.92 0.12
 9 -6 4 2.92 0.12
 -9 -6 5 1.1 0.08
 9 -6 -5 1.14 0.07
 -9 6 -5 1.18 0.08
 -9 -6 5 1.13 0.07
 9 -6 -5 1.21 0.06
 9 -6 -5 1.18 0.07
 -9 6 5 1.13 0.07
 -9 -6 -5 1.14 0.07
 9 -6 5 1.21 0.08
 9 -6 5 1.11 0.07
 9 -6 -6 1.3 0.08
 9 -6 -6 1.41 0.08
 -9 -6 6 1.55 0.1
 9 -6 -6 1.36 0.07
 -9 -6 6 1.61 0.09
 -9 6 -6 1.38 0.09
 -9 -6 -6 1.2 0.08
 -9 6 6 1.39 0.08
 9 -6 6 1.41 0.08
 9 -6 6 1.61 0.1
 -9 6 6 1.45 0.08
 -9 6 -7 0.82 0.08
 -9 -6 7 0.85 0.08
 -9 -6 7 0.84 0.08
 9 -6 7 0.81 0.08
 -9 6 7 0.88 0.07
 -9 -6 -7 0.86 0.08
 -9 -6 8 2.41 0.13
 -9 -6 8 2.32 0.13
 -9 6 -8 2.37 0.13
 -9 6 8 2.17 0.12
 9 -6 8 2.19 0.13
 -9 -6 -8 2.51 0.13
 -9 -7 0 2.58 0.1
 9 -7 0 2.54 0.1
 9 7 0 2.57 0.1
 9 -7 0 2.45 0.11
 -9 7 0 2.55 0.1
 9 7 1 2.38 0.09
 9 -7 -1 2.32 0.1
 -9 7 -1 2.27 0.1
 -9 -7 1 2.46 0.1
 9 -7 -1 2.19 0.1
 -9 -7 -1 2.46 0.09
 9 7 -1 2.37 0.09
 9 -7 1 2.31 0.1
 -9 -7 -1 2.37 0.09
 9 -7 1 2.25 0.1
 -9 7 1 2.33 0.09
 -9 7 -2 6.03 0.2
 -9 -7 2 5.99 0.2
 9 -7 -2 6.29 0.2
 9 -7 -2 5.62 0.2
 -9 -7 2 6.38 0.19
 9 -7 2 6.09 0.21
 -9 -7 -2 6.13 0.19
 9 -7 2 6.33 0.21
 -9 7 2 6.25 0.19
 9 7 -2 5.89 0.18
 9 -7 -3 6.32 0.21
 -9 7 -3 6.35 0.21
 -9 -7 3 6.08 0.22
 -9 -7 3 6.66 0.2
 9 -7 -3 6.08 0.21
 9 -7 3 6.1 0.22
 9 7 -3 6.77 0.19
 -9 -7 -3 6.24 0.2
 9 -7 3 6.27 0.22
 -9 7 3 6.5 0.2
 9 -7 -4 4.12 0.14
 -9 -7 4 3.76 0.16
 9 -7 -4 3.89 0.15
 -9 7 -4 4.19 0.15
 9 -7 -4 3.96 0.15
 -9 -7 4 3.84 0.14
 -9 7 4 3.82 0.14
 9 -7 4 3.74 0.15
 9 -7 4 3.8 0.15
 9 7 -4 4.08 0.13
 -9 -7 -4 3.84 0.15
 9 -7 -5 0.01 0.01
 -9 -7 5 0.02 0.01
 -9 7 -5 0.01 0.01
 9 -7 -5 0.02 0.02
 -9 -7 5 0.12 0.05
 9 -7 -5 0.05 0.03
 -9 -7 -5 0.09 0.04
 -9 7 5 0.02 0.01
 9 -7 5 0.08 0.04
 9 -7 5 0.03 0.02
 -9 -7 6 4.06 0.16
 -9 -7 6 4.05 0.17
 -9 7 -6 3.9 0.16
 9 -7 -6 3.69 0.14
 9 -7 -6 3.54 0.15
 -9 7 6 3.79 0.15
 -9 7 6 3.75 0.15
 9 -7 6 4.05 0.17
 9 -7 6 3.75 0.15
 -9 -7 -6 3.99 0.16
 -9 -7 7 0.33 0.06
 -9 -7 7 0.36 0.06
 -9 7 -7 0.33 0.06
 9 -7 7 0.35 0.06
 -9 -7 -7 0.24 0.05
 9 -7 7 0.32 0.05
 -9 7 7 0.33 0.05
 -9 -7 8 0.37 0.07
 -9 -7 8 0.29 0.06
 -9 7 -8 0.46 0.07
 9 -7 8 0.35 0.07
 -9 -7 -8 0.32 0.06
 -9 8 0 4.36 0.15
 9 8 0 4.29 0.15
 9 -8 0 4.47 0.17
 9 -8 0 4.44 0.15
 -9 -8 0 4.32 0.15
 9 8 1 0.78 0.05
 9 -8 -1 0.68 0.05
 9 -8 -1 0.72 0.06
 -9 8 -1 0.68 0.05
 -9 -8 1 0.7 0.05
 -9 -8 -1 0.68 0.05
 -9 -8 -1 0.7 0.05
 -9 8 1 0.65 0.05
 9 8 -1 0.66 0.05
 9 -8 1 0.76 0.06
 9 -8 1 0.71 0.05
 -9 -8 2 2.47 0.11
 9 -8 -2 2.73 0.11
 -9 8 -2 2.71 0.11
 9 -8 -2 2.58 0.12
 9 -8 2 2.63 0.12
 9 -8 2 2.56 0.11
 -9 -8 -2 2.71 0.11
 9 8 -2 2.59 0.1
 -9 8 2 2.49 0.1
 -9 8 -3 2.92 0.12
 9 -8 -3 3 0.12
 9 -8 -3 2.97 0.13
 -9 -8 -3 2.94 0.12
 9 -8 3 2.96 0.13
 9 -8 3 2.93 0.13
 9 8 -3 3.14 0.11
 -9 8 3 3.02 0.12
 9 -8 -4 5.5 0.19
 -9 -8 4 5.42 0.18
 -9 8 -4 5.57 0.19
 -9 -8 4 5.21 0.2
 9 -8 -4 5.35 0.19
 -9 8 4 5.16 0.18
 9 -8 4 5.38 0.2
 9 8 -4 5.09 0.17
 9 -8 4 4.99 0.19
 -9 -8 -4 5.46 0.19
 -9 8 -5 3.33 0.14
 -9 -8 5 2.93 0.13
 -9 -8 5 3.29 0.15
 9 -8 -5 3.14 0.12
 9 -8 -5 2.91 0.13
 9 -8 -5 3.01 0.13
 -9 8 5 3.01 0.12
 9 -8 5 3.28 0.14
 -9 -8 -5 3.54 0.14
 9 -8 5 3.21 0.14
 -9 -8 6 1.51 0.09
 9 -8 -6 1.44 0.08
 -9 8 -6 1.73 0.1
 -9 -8 6 1.73 0.11
 9 -8 6 1.57 0.1
 -9 -8 -6 1.72 0.1
 9 -8 6 1.56 0.09
 -9 8 6 1.46 0.08
 -9 8 -7 0.64 0.08
 -9 -8 7 0.61 0.07
 -9 -8 7 0.58 0.07
 9 -8 7 0.56 0.06
 -9 -8 -7 0.72 0.07
 9 -8 7 0.56 0.07
 -9 -8 8 3.2 0.16
 -9 8 -8 3.29 0.16
 -9 -8 8 3.42 0.16
 9 -8 8 3.11 0.16
 -9 -8 -8 3.58 0.16
 9 9 0 37.29 0.96
 -9 9 0 36.29 0.97
 9 -9 0 38.1 1.03
 9 -9 0 34.64 1.03
 -9 -9 0 37.27 1.02
 9 -9 -1 4.1 0.16
 -9 -9 1 4.08 0.15
 9 -9 -1 3.93 0.14
 -9 9 -1 3.83 0.15
 9 9 1 3.98 0.14
 9 -9 1 3.75 0.14
 9 -9 1 3.75 0.15
 9 9 -1 3.86 0.14
 -9 -9 -1 3.84 0.14
 -9 9 1 3.93 0.14
 9 -9 -2 8.39 0.29
 -9 9 -2 8.57 0.27
 9 9 2 8.94 0.27
 -9 -9 2 8.86 0.29
 9 -9 -2 9.05 0.28
 -9 9 2 8.87 0.27
 9 -9 2 8.7 0.28
 9 9 -2 8.7 0.26
 -9 -9 -2 8.61 0.27
 9 -9 2 9.09 0.29
 -9 -9 3 0.72 0.07
 9 -9 -3 0.77 0.06
 -9 9 -3 0.72 0.06
 9 -9 -3 0.72 0.06
 -9 9 3 0.69 0.06
 -9 -9 -3 0.73 0.06
 9 9 -3 0.72 0.05
 9 -9 3 0.8 0.06
 9 -9 3 0.76 0.06
 -9 9 -4 1.85 0.1
 9 -9 -4 1.94 0.1
 -9 -9 4 2.05 0.11
 -9 9 4 1.89 0.09
 9 9 -4 1.85 0.09
 -9 -9 -4 1.87 0.1
 9 -9 4 1.92 0.1
 9 -9 4 1.83 0.1
 -9 9 -5 0.42 0.06
 -9 -9 5 0.48 0.06
 9 -9 -5 0.39 0.05
 9 -9 5 0.48 0.06
 -9 -9 -5 0.43 0.06
 9 -9 5 0.42 0.06
 -9 9 5 0.41 0.05
 -9 -9 6 6.96 0.27
 9 -9 -6 7.47 0.24
 -9 9 -6 8.05 0.27
 -9 -9 6 7.76 0.28
 -9 9 6 6.96 0.24
 9 -9 6 7.51 0.27
 -9 -9 -6 7.82 0.26
 9 -9 6 7.72 0.28
 -9 -9 7 1.38 0.09
 -9 9 -7 1.34 0.1
 -9 -9 7 1.41 0.1
 9 -9 7 1.59 0.11
 -9 -9 -7 1.43 0.1
 9 -9 7 1.31 0.09
 -9 -10 0 0.21 0.04
 9 -10 0 0.05 0.03
 9 -10 0 0.02 0.02
 9 10 0 0.03 0.01
 -9 10 0 0.1 0.04
 9 10 1 0.51 0.05
 9 -10 -1 0.45 0.05
 -9 10 -1 0.44 0.05
 -9 -10 1 0.42 0.05
 9 -10 1 0.39 0.05
 -9 10 1 0.47 0.05
 9 -10 1 0.4 0.05
 9 10 -1 0.52 0.05
 -9 -10 2 5.7 0.21
 9 10 2 5.41 0.2
 9 -10 -2 6.03 0.21
 -9 10 -2 6.04 0.21
 9 -10 2 5.57 0.2
 9 -10 2 5.84 0.22
 9 10 -2 5.67 0.19
 -9 10 2 5.5 0.19
 -9 10 -3 0.94 0.07
 9 10 3 1.03 0.07
 -9 -10 3 0.74 0.07
 9 -10 -3 0.93 0.07
 9 -10 3 0.99 0.08
 9 -10 3 0.91 0.07
 -9 -10 -3 1.04 0.07
 -9 10 3 0.97 0.07
 9 10 -3 0.84 0.06
 -9 10 -4 7.96 0.26
 9 -10 -4 6.98 0.25
 -9 -10 4 7.6 0.27
 -9 10 4 7.05 0.24
 9 10 -4 6.85 0.24
 -9 -10 -4 7.86 0.25
 9 -10 4 7.41 0.26
 9 -10 4 7.54 0.27
 -9 -10 5 0.68 0.07
 -9 10 -5 0.58 0.07
 9 -10 5 0.72 0.07
 -9 10 5 0.62 0.06
 -9 -10 -5 0.81 0.07
 9 -10 5 0.66 0.07
 -9 10 -6 5.13 0.2
 -9 -10 6 4.62 0.2
 9 -10 6 4.83 0.2
 9 -10 6 5.02 0.2
 -9 10 6 4.64 0.18
 -9 -10 -6 4.92 0.19
 -9 -10 7 0.4 0.07
 -9 10 -7 0.47 0.07
 9 -10 7 0.42 0.07
 9 -10 7 0.46 0.07
 -9 -10 -7 0.45 0.07
 -9 -11 0 0 0.01
 -9 11 0 0.01 0.01
 9 -11 0 0 0.02
 9 11 0 0 0.01
 9 -11 -1 0.81 0.07
 -9 11 -1 0.85 0.07
 9 11 1 0.83 0.07
 -9 -11 1 0.86 0.07
 9 11 -1 0.85 0.06
 9 -11 1 0.82 0.07
 -9 11 1 0.89 0.07
 9 11 2 1.06 0.08
 -9 -11 2 1.07 0.08
 9 -11 -2 1.02 0.08
 -9 11 -2 1.12 0.08
 9 11 -2 1.05 0.07
 9 -11 2 0.96 0.07
 9 -11 2 1.04 0.08
 -9 11 2 1 0.07
 -9 11 -3 0.09 0.05
 -9 -11 3 0.01 0.02
 9 -11 -3 0 0.02
 9 11 3 0 0.01
 -9 -11 -3 0.02 0.02
 -9 11 3 -0.01 0.01
 9 -11 3 0.01 0.01
 9 -11 3 0.09 0.05
 9 11 -3 0.02 0.01
 -9 11 -4 0.88 0.08
 -9 -11 4 0.67 0.08
 9 11 4 0.85 0.07
 9 -11 -4 0.84 0.07
 9 -11 4 0.9 0.08
 9 -11 4 0.81 0.07
 -9 11 4 0.91 0.07
 -9 -11 -4 0.87 0.08
 -9 11 -5 1.16 0.09
 -9 -11 5 1.19 0.1
 9 -11 5 1.21 0.09
 -9 -11 -5 1.29 0.09
 9 -11 5 1.26 0.09
 -9 11 5 1.3 0.08
 -9 11 -6 0.15 0.06
 -9 -11 6 0.08 0.06
 -9 11 6 0.01 0.02
 9 -11 6 0.09 0.05
 -9 -11 -6 0.1 0.05
 9 -11 6 0.06 0.05
 9 12 0 1.39 0.09
 -9 12 0 1.56 0.09
 9 -12 0 1.34 0.09
 9 12 1 0.18 0.05
 -9 -12 1 0.2 0.05
 9 -12 -1 0.24 0.05
 -9 12 -1 0.22 0.05
 9 -12 1 0.1 0.05
 9 12 -1 0.17 0.05
 -9 12 1 0.21 0.05
 -9 12 -2 1.42 0.09
 9 12 2 1.21 0.09
 9 -12 -2 1.29 0.09
 -9 -12 2 1.35 0.09
 9 -12 2 1.24 0.09
 -9 12 2 1.29 0.09
 9 12 -2 1.23 0.08
 -9 -12 3 6.34 0.24
 9 12 3 6.33 0.22
 -9 12 -3 6.27 0.23
 9 -12 -3 5.85 0.23
 -9 12 3 6.07 0.22
 9 12 -3 5.81 0.21
 9 -12 3 6.43 0.24
 -9 -12 4 1.34 0.1
 -9 12 -4 1.46 0.1
 9 12 4 1.37 0.09
 -9 12 4 1.57 0.09
 -9 -12 -4 1.42 0.1
 9 -12 4 1.46 0.1
 9 -12 4 1.36 0.1
 9 12 5 3.27 0.15
 -9 12 -5 3.18 0.16
 -9 -12 5 3 0.16
 9 -12 5 3.67 0.17
 9 -12 5 3.31 0.15
 -9 -12 -5 3.29 0.15
 -9 12 5 3.42 0.15
 -9 13 0 6.74 0.23
 9 -13 0 6.24 0.24
 9 13 0 6.19 0.22
 9 13 1 0.17 0.05
 -9 13 -1 0.19 0.06
 9 -13 -1 0.23 0.05
 -9 -13 1 0.24 0.05
 9 -13 1 0.24 0.06
 -9 13 1 0.25 0.06
 9 13 -1 0.22 0.05
 -9 13 -2 0.16 0.06
 -9 -13 2 0.13 0.05
 9 -13 -2 0.08 0.05
 9 13 2 0.18 0.05
 9 -13 2 0.1 0.05
 -9 13 2 0.13 0.05
 -9 -13 3 2.01 0.12
 9 13 3 1.85 0.11
 -9 13 -3 2.07 0.12
 9 -13 -3 1.96 0.11
 9 -13 3 2.02 0.12
 -9 13 3 1.93 0.11
 9 13 -3 2.01 0.11
 -9 -13 4 4.67 0.2
 9 13 4 4.49 0.19
 -9 13 -4 4.48 0.19
 -9 13 4 4.65 0.18
 9 -13 4 4.52 0.2
 9 14 0 10.28 0.34
 9 -14 0 10.62 0.36
 -9 14 0 10.71 0.35
 -9 14 -1 0.33 0.06
 9 14 1 0.29 0.06
 9 -14 -1 0.38 0.07
 9 14 -1 0.35 0.06
 9 -14 1 0.38 0.07
 -9 14 1 0.36 0.06
 -9 -14 2 5.73 0.22
 -9 14 -2 5.65 0.22
 9 14 2 6.04 0.22
 9 -14 -2 5.5 0.22
 -9 14 2 5.75 0.22
 9 14 -2 5.7 0.21
 9 -14 2 5.51 0.23
 10 0 0 82.92 2.19
 10 0 0 80.94 2.22
 -10 0 0 81.47 2.04
 10 0 1 88.89 2.32
 -10 0 1 82.32 2.29
 10 0 -1 87.56 2.29
 10 0 1 87.49 2.28
 -10 0 -1 83.09 2.15
 10 0 -1 84.16 2.33
 10 0 2 12.9 0.35
 10 0 2 12.99 0.36
 10 0 -2 11.98 0.36
 -10 0 -2 12.33 0.33
 10 0 -2 12 0.36
 -10 0 2 12.4 0.36
 -10 0 -3 24.24 0.62
 -10 0 3 23.35 0.67
 10 0 3 25.22 0.67
 10 0 -3 23.09 0.6
 10 0 -3 22.96 0.68
 10 0 3 23.42 0.64
 10 0 -4 14.45 0.38
 -10 0 4 14.99 0.43
 10 0 4 14.59 0.43
 -10 0 -4 14.48 0.4
 10 0 4 14.44 0.4
 10 0 -4 14.41 0.44
 10 0 5 12.11 0.37
 10 0 -5 12.22 0.38
 -10 0 5 12.13 0.38
 -10 0 -5 12.8 0.36
 -10 0 5 12.51 0.38
 -10 0 6 2.14 0.1
 -10 0 -6 2.08 0.1
 -10 0 6 2.11 0.11
 10 0 6 2.37 0.11
 -10 0 7 3.02 0.13
 -10 0 -7 3.09 0.14
 10 0 7 3.14 0.14
 -10 0 7 3.01 0.14
 -10 0 -8 2.82 0.14
 -10 0 8 2.87 0.14
 10 0 8 2.65 0.13
 -10 0 8 2.68 0.13
 -10 0 -9 2.72 0.14
 10 0 9 2.8 0.14
 -10 0 9 2.73 0.15
 10 1 0 0.74 0.04
 -10 -1 0 0.83 0.03
 -10 1 0 0.72 0.03
 -10 -1 0 0.79 0.04
 10 1 0 0.82 0.04
 10 -1 0 0.75 0.04
 10 -1 0 0.83 0.04
 10 1 1 44.1 1.15
 -10 1 -1 41.76 1.09
 10 1 1 43.7 1.17
 10 -1 -1 43.08 1.18
 -10 -1 1 42.81 1.16
 10 -1 -1 42.45 1.17
 10 1 -1 44.36 1.18
 10 -1 1 43.49 1.16
 -10 1 1 41.63 1.07
 10 1 -1 41.78 1.16
 10 -1 1 41.96 1.18
 -10 -1 -1 43.46 1.08
 -10 -1 -1 43.32 1.15
 10 -1 -2 18.33 0.53
 10 1 2 18.58 0.51
 10 -1 -2 18.57 0.54
 -10 1 -2 19.43 0.5
 10 1 2 19.92 0.53
 -10 -1 2 18.15 0.53
 10 -1 2 18.62 0.54
 10 -1 2 19.05 0.52
 -10 1 2 19.02 0.53
 10 1 -2 19.9 0.54
 -10 -1 -2 19.73 0.5
 -10 1 2 17.62 0.48
 10 1 3 6.12 0.2
 -10 1 -3 6.55 0.19
 10 -1 -3 6.2 0.21
 10 -1 -3 6.53 0.17
 10 -1 -3 6.15 0.21
 10 1 3 6.44 0.18
 10 1 -3 6.64 0.21
 10 1 -3 6.48 0.17
 10 -1 3 6.54 0.21
 10 -1 3 6.34 0.19
 -10 -1 -3 6.63 0.19
 -10 1 3 6.35 0.21
 10 -1 -4 1.26 0.05
 -10 -1 4 1.33 0.07
 -10 1 -4 1.15 0.06
 10 -1 -4 1.25 0.07
 10 1 4 1.22 0.06
 -10 1 4 1.25 0.07
 10 -1 4 1.34 0.05
 10 -1 4 1.26 0.07
 -10 -1 -4 1.25 0.07
 10 1 -4 1.24 0.05
 10 1 -4 1.2 0.07
 10 1 5 1.91 0.09
 -10 1 -5 2 0.09
 10 -1 -5 1.82 0.09
 -10 -1 5 2.04 0.1
 -10 -1 5 2.05 0.1
 -10 -1 -5 1.85 0.09
 -10 1 5 2.05 0.09
 10 -1 5 2.03 0.09
 -10 1 5 1.95 0.1
 -10 1 -6 5.39 0.19
 -10 -1 6 4.94 0.19
 10 1 6 5.2 0.19
 -10 -1 6 5.45 0.19
 -10 1 6 5.17 0.19
 10 -1 6 5.27 0.19
 -10 1 6 5.3 0.2
 -10 -1 -6 5.1 0.18
 -10 -1 7 0.47 0.06
 -10 -1 7 0.46 0.06
 10 1 7 0.52 0.05
 -10 1 -7 0.51 0.06
 -10 1 7 0.47 0.05
 -10 1 7 0.49 0.06
 10 -1 7 0.51 0.06
 10 1 8 0.33 0.05
 -10 1 -8 0.35 0.06
 -10 -1 8 0.27 0.05
 -10 -1 8 0.31 0.06
 -10 1 8 0.3 0.06
 10 -1 8 0.34 0.06
 -10 1 8 0.38 0.05
 -10 -1 -8 0.32 0.06
 -10 1 -9 0.24 0.06
 10 1 9 0.19 0.06
 -10 -1 9 0.29 0.06
 -10 -1 9 0.36 0.07
 10 -1 9 0.3 0.06
 -10 -1 -9 0.23 0.06
 -10 1 9 0.29 0.06
 10 -2 0 30.56 0.86
 -10 2 0 30.25 0.78
 10 -2 0 31.36 0.85
 -10 -2 0 30.88 0.78
 10 2 0 31.37 0.85
 -10 -2 0 30.79 0.84
 10 -2 -1 34.26 0.95
 10 -2 -1 34.5 0.96
 10 2 1 34.56 0.95
 -10 -2 1 35.15 0.95
 -10 2 -1 35.67 0.89
 -10 -2 -1 35.18 0.94
 10 2 -1 35 0.87
 -10 -2 -1 35.5 0.88
 10 -2 1 33.89 0.96
 10 2 -1 35.11 0.96
 -10 2 1 33.99 0.88
 10 -2 1 34.42 0.95
 10 -2 -2 27.47 0.74
 -10 -2 2 25.56 0.74
 10 2 2 26.72 0.74
 -10 2 -2 27.03 0.69
 10 -2 -2 25.13 0.75
 -10 2 2 25.94 0.67
 10 2 -2 26.36 0.67
 10 2 -2 26.82 0.75
 -10 -2 -2 27.48 0.72
 10 -2 2 27.13 0.73
 -10 -2 -2 27.98 0.69
 10 -2 2 26.45 0.75
 10 -2 -3 2.89 0.09
 -10 2 -3 3.06 0.11
 10 -2 -3 3.06 0.12
 10 -2 -3 2.74 0.11
 10 2 3 3.03 0.1
 -10 -2 -3 3 0.11
 10 -2 3 3.04 0.12
 10 2 -3 3.14 0.09
 10 -2 3 2.99 0.1
 -10 2 3 2.97 0.11
 10 2 -3 2.99 0.11
 10 -2 -4 4.97 0.14
 -10 2 -4 4.76 0.16
 -10 -2 4 5.05 0.17
 10 2 4 4.87 0.16
 10 -2 -4 4.82 0.18
 -10 -2 4 4.75 0.17
 10 -2 -4 4.61 0.17
 10 2 -4 4.95 0.18
 -10 2 4 5.07 0.17
 10 -2 4 5.21 0.16
 10 -2 4 5.27 0.18
 10 2 -4 5.16 0.15
 -10 -2 -4 5.01 0.16
 10 -2 -5 3.64 0.15
 -10 -2 5 3.73 0.15
 -10 2 -5 3.71 0.14
 -10 -2 5 3.9 0.15
 10 2 5 3.8 0.14
 -10 -2 -5 4.11 0.14
 10 -2 5 3.82 0.15
 10 -2 5 4.05 0.13
 -10 2 5 3.77 0.14
 10 -2 -6 0.71 0.07
 10 2 6 0.73 0.06
 -10 2 -6 0.74 0.06
 -10 -2 6 0.77 0.07
 -10 -2 6 0.78 0.06
 -10 -2 -6 0.72 0.06
 10 -2 6 0.85 0.07
 -10 2 6 0.8 0.06
 -10 2 6 0.78 0.07
 10 2 7 3.84 0.16
 -10 2 -7 4.65 0.17
 -10 -2 7 4 0.17
 -10 -2 7 4.39 0.18
 10 -2 7 4.42 0.18
 -10 2 7 4.13 0.16
 -10 -2 -7 4.32 0.17
 -10 2 7 4.42 0.18
 -10 -2 8 0.15 0.05
 10 2 8 0.18 0.05
 -10 -2 8 0.2 0.05
 -10 2 -8 0.08 0.05
 -10 -2 -8 0.16 0.06
 -10 2 8 0.21 0.05
 10 -2 8 0.22 0.05
 -10 2 8 0.24 0.05
 -10 -2 9 1.06 0.09
 -10 2 -9 1.04 0.09
 -10 -2 9 1.12 0.09
 -10 -2 -9 1.05 0.09
 -10 2 9 1.18 0.09
 10 -2 9 1.15 0.09
 -10 -3 0 8.26 0.24
 10 3 0 8.86 0.24
 10 -3 0 8.31 0.25
 -10 3 0 8.25 0.22
 10 -3 0 8.05 0.25
 -10 -3 0 7.84 0.22
 -10 -3 1 40.84 1.11
 10 -3 -1 40.88 1.11
 10 3 1 40.19 1.11
 10 -3 -1 37.77 1.12
 -10 3 -1 41.36 1.04
 -10 -3 -1 41.6 1.09
 10 -3 1 42.05 1.11
 10 3 -1 40.51 1.12
 -10 -3 -1 40.94 1.03
 -10 3 1 40.26 1.03
 10 -3 1 41.06 1.12
 10 3 -1 40.57 1.02
 10 3 2 46.7 1.3
 10 -3 -2 46.36 1.31
 -10 3 -2 48.55 1.22
 10 -3 -2 46.16 1.3
 -10 -3 2 46.93 1.29
 -10 -3 -2 47.08 1.21
 10 3 -2 48.45 1.31
 -10 -3 -2 48.68 1.27
 -10 3 2 45.84 1.2
 10 -3 2 48.49 1.29
 10 3 -2 48.23 1.2
 10 -3 2 49.92 1.32
 -10 -3 3 0.44 0.04
 10 3 3 0.47 0.03
 -10 3 -3 0.48 0.04
 10 -3 -3 0.5 0.04
 10 -3 -3 0.51 0.03
 -10 -3 3 0.4 0.04
 10 -3 -3 0.45 0.04
 -10 -3 -3 0.45 0.04
 10 -3 3 0.45 0.04
 10 3 -3 0.45 0.02
 10 -3 3 0.45 0.04
 10 3 -3 0.39 0.04
 -10 3 3 0.47 0.03
 -10 3 -4 23.17 0.63
 -10 -3 4 23.47 0.68
 10 3 4 24.73 0.66
 10 -3 -4 22.23 0.67
 10 -3 -4 23.64 0.61
 -10 -3 4 24.04 0.67
 10 -3 -4 22.28 0.68
 -10 3 4 23.93 0.67
 10 -3 4 24.74 0.66
 -10 -3 -4 23.97 0.63
 10 -3 4 24.26 0.68
 10 -3 -5 5.29 0.19
 -10 -3 5 5.55 0.2
 10 3 5 5.45 0.18
 10 -3 -5 5.7 0.17
 -10 3 -5 5.45 0.19
 10 -3 -5 5.57 0.2
 -10 -3 5 5.24 0.19
 -10 3 5 5.54 0.19
 10 -3 5 5.65 0.18
 -10 -3 -5 5.58 0.19
 -10 -3 6 1.69 0.1
 10 3 6 1.68 0.08
 -10 -3 6 1.78 0.1
 -10 3 -6 1.89 0.1
 10 -3 -6 1.78 0.1
 -10 3 6 1.71 0.1
 10 -3 6 1.82 0.1
 -10 3 6 1.67 0.09
 -10 -3 -6 1.81 0.1
 -10 -3 7 1.12 0.08
 -10 -3 7 1.17 0.08
 -10 3 -7 1.11 0.08
 -10 3 7 1.06 0.07
 10 -3 7 1.14 0.08
 -10 -3 -7 1.19 0.08
 -10 3 7 1.15 0.08
 -10 -3 8 10.09 0.34
 -10 -3 8 9.93 0.35
 -10 3 -8 10.5 0.33
 -10 -3 -8 10.36 0.33
 -10 3 8 9.99 0.34
 10 -3 8 10.29 0.35
 -10 -3 9 0.41 0.07
 -10 3 -9 0.34 0.07
 -10 -3 9 0.41 0.06
 -10 -3 -9 0.36 0.07
 10 -3 9 0.46 0.07
 -10 3 9 0.34 0.06
 -10 -4 0 14.14 0.4
 -10 4 0 14.16 0.38
 -10 -4 0 14.36 0.37
 10 -4 0 14.19 0.41
 10 -4 0 13.81 0.41
 10 4 0 14.32 0.4
 10 -4 -1 15.2 0.44
 10 -4 -1 14.29 0.44
 -10 -4 1 14.79 0.43
 10 4 1 15.08 0.42
 -10 4 -1 15.82 0.41
 10 4 -1 15.73 0.4
 -10 -4 -1 15.73 0.4
 10 4 -1 15.82 0.43
 10 -4 1 15.3 0.44
 -10 4 1 15.1 0.4
 -10 -4 -1 15.52 0.42
 10 -4 1 14.65 0.44
 -10 -4 2 17.78 0.53
 -10 -4 2 18.78 0.53
 -10 4 -2 19.14 0.5
 10 -4 -2 18.5 0.54
 10 -4 -2 19.03 0.54
 10 4 2 19.26 0.52
 10 -4 2 19.37 0.53
 10 4 -2 19.12 0.48
 10 4 -2 18.44 0.53
 -10 -4 -2 18.7 0.5
 -10 4 2 18.77 0.49
 10 -4 2 18.42 0.54
 -10 -4 -2 19.13 0.51
 10 -4 -3 28.02 0.79
 10 4 3 28.33 0.77
 -10 -4 3 26.54 0.78
 -10 4 -3 28.63 0.74
 10 -4 -3 29.3 0.72
 10 -4 -3 25.9 0.79
 -10 -4 3 28.32 0.79
 10 -4 3 28.05 0.78
 10 4 -3 28.58 0.72
 -10 -4 -3 27.94 0.74
 -10 4 3 27.98 0.72
 10 -4 3 28.85 0.8
 10 4 4 7.48 0.22
 -10 -4 4 7.33 0.24
 10 -4 -4 7.4 0.25
 -10 4 -4 7.45 0.23
 10 -4 -4 7.5 0.21
 -10 -4 4 7.17 0.24
 10 -4 -4 6.96 0.24
 10 -4 4 7.29 0.25
 -10 4 4 7.48 0.24
 10 -4 4 7.78 0.23
 -10 -4 -4 7.28 0.23
 10 -4 -5 5.42 0.2
 10 -4 -5 5.47 0.17
 -10 -4 5 5.51 0.2
 -10 -4 5 5.38 0.19
 -10 4 -5 5.49 0.19
 10 -4 -5 5.16 0.19
 -10 -4 -5 5.54 0.19
 10 -4 5 5.31 0.2
 10 -4 5 5.41 0.18
 -10 4 5 5.33 0.19
 -10 -4 6 3.69 0.15
 -10 -4 6 3.39 0.15
 10 -4 -6 3.49 0.15
 -10 4 -6 3.7 0.15
 10 -4 6 3.56 0.15
 -10 4 6 3.71 0.14
 -10 4 6 3.69 0.15
 -10 -4 -6 3.62 0.15
 -10 4 -7 0.63 0.06
 -10 -4 7 0.65 0.07
 -10 -4 7 0.63 0.07
 10 -4 7 0.55 0.07
 -10 4 7 0.53 0.06
 -10 -4 -7 0.56 0.06
 -10 4 7 0.6 0.06
 -10 -4 8 4.67 0.19
 -10 4 -8 4.54 0.19
 -10 -4 8 4.86 0.2
 -10 4 8 4.64 0.19
 10 -4 8 4.84 0.2
 -10 -4 -8 4.9 0.19
 -10 4 -9 0.02 0.02
 -10 -4 9 0.03 0.02
 -10 -4 9 0.02 0.02
 -10 -4 -9 0 0.02
 10 -4 9 0.01 0.02
 -10 4 9 0 0.02
 10 5 0 11.3 0.3
 -10 -5 0 11.24 0.32
 10 -5 0 11.21 0.33
 -10 -5 0 10.97 0.3
 -10 5 0 10.98 0.3
 10 5 0 11.19 0.31
 10 -5 0 10.58 0.33
 10 -5 -1 2.1 0.09
 -10 -5 1 2.17 0.08
 -10 -5 1 2.09 0.09
 -10 5 -1 2.33 0.08
 10 5 1 2.09 0.07
 10 -5 -1 2.06 0.09
 10 5 -1 2.09 0.08
 10 -5 1 2.21 0.09
 -10 5 1 2.11 0.08
 10 -5 1 2.03 0.09
 -10 -5 -1 2.1 0.08
 10 5 -1 2.28 0.08
 -10 -5 -1 2.21 0.08
 10 -5 -2 6.88 0.23
 -10 5 -2 7.33 0.22
 -10 -5 2 6.97 0.23
 -10 -5 2 7.55 0.22
 10 -5 -2 7.14 0.23
 10 -5 2 7.46 0.24
 -10 -5 -2 7.16 0.21
 -10 -5 -2 7.38 0.21
 -10 5 2 7.34 0.21
 10 -5 2 7.22 0.23
 10 5 -2 7.45 0.2
 -10 -5 3 24.91 0.71
 10 -5 -3 24.36 0.72
 -10 -5 3 26.11 0.71
 10 -5 -3 24.1 0.71
 -10 5 -3 25.02 0.67
 -10 5 3 25.14 0.66
 -10 -5 -3 25.9 0.67
 10 -5 3 25.28 0.73
 10 5 -3 25.76 0.65
 10 -5 3 25.93 0.71
 10 -5 -4 0.37 0.04
 -10 5 -4 0.36 0.05
 10 -5 -4 0.33 0.04
 10 -5 -4 0.36 0.03
 -10 -5 4 0.35 0.04
 -10 -5 4 0.35 0.05
 10 -5 4 0.36 0.05
 -10 -5 -4 0.38 0.04
 10 -5 4 0.32 0.04
 -10 5 4 0.33 0.03
 10 -5 -5 0.6 0.04
 10 -5 -5 0.58 0.06
 -10 -5 5 0.53 0.06
 -10 5 -5 0.59 0.06
 -10 -5 5 0.55 0.05
 10 -5 -5 0.58 0.05
 -10 -5 -5 0.51 0.05
 -10 5 5 0.54 0.05
 10 -5 5 0.56 0.06
 10 -5 5 0.56 0.05
 10 -5 -6 2.56 0.12
 -10 -5 6 2.58 0.13
 -10 5 -6 2.67 0.12
 -10 -5 6 2.54 0.12
 10 -5 -6 2.43 0.12
 -10 -5 -6 2.7 0.12
 -10 5 6 2.55 0.12
 10 -5 6 2.55 0.11
 -10 5 6 2.65 0.12
 10 -5 6 2.57 0.13
 -10 -5 7 2.72 0.13
 -10 5 -7 2.77 0.13
 -10 -5 7 2.75 0.13
 -10 -5 -7 2.58 0.13
 -10 5 7 2.4 0.12
 10 -5 7 2.72 0.14
 -10 5 7 2.68 0.13
 -10 5 -8 0.5 0.07
 -10 -5 8 0.56 0.07
 -10 -5 8 0.56 0.07
 -10 5 8 0.5 0.06
 10 -5 8 0.56 0.07
 -10 -5 -8 0.46 0.07
 -10 5 -9 0.65 0.08
 -10 -5 9 0.82 0.08
 -10 -5 9 0.74 0.08
 -10 -5 -9 0.87 0.08
 -10 5 9 0.71 0.08
 10 -5 9 0.86 0.09
 10 6 0 17.41 0.46
 10 -6 0 17.15 0.5
 10 -6 0 17.06 0.5
 -10 -6 0 17.31 0.49
 -10 6 0 17.27 0.46
 -10 -6 1 25.24 0.71
 -10 6 -1 25.55 0.67
 -10 -6 1 27.1 0.7
 10 -6 -1 24.71 0.72
 10 -6 -1 24.99 0.72
 -10 6 1 25.56 0.67
 10 -6 1 25.25 0.72
 10 6 -1 26.1 0.66
 -10 -6 -1 26.13 0.7
 -10 -6 -1 25.47 0.67
 10 -6 1 23.37 0.72
 -10 -6 2 8.3 0.24
 10 -6 -2 7.4 0.25
 -10 -6 2 7.73 0.25
 -10 6 -2 7.67 0.23
 10 -6 -2 7.69 0.25
 -10 -6 -2 7.75 0.23
 10 -6 2 7.69 0.25
 -10 6 2 7.56 0.22
 10 6 -2 7.98 0.22
 10 -6 2 8.01 0.25
 -10 6 -3 11.98 0.36
 10 -6 -3 12.8 0.38
 -10 -6 3 12.79 0.37
 10 -6 -3 12.45 0.38
 -10 -6 3 12.09 0.38
 -10 6 3 12.36 0.34
 10 -6 3 12.19 0.37
 10 -6 3 12.15 0.38
 -10 -6 -3 12.52 0.35
 10 6 -3 13.08 0.34
 -10 -6 4 0.07 0.04
 -10 -6 4 0.06 0.03
 -10 6 -4 0.1 0.03
 10 -6 -4 0.11 0.03
 10 -6 -4 0.06 0.04
 10 -6 -4 0.12 0.04
 10 -6 4 0.08 0.04
 -10 6 4 0.12 0.03
 -10 -6 -4 0.05 0.03
 10 -6 4 0.02 0.01
 10 -6 -5 5.48 0.2
 10 -6 -5 5.74 0.18
 -10 -6 5 5.74 0.21
 -10 -6 5 5.82 0.2
 -10 6 -5 5.49 0.2
 10 -6 -5 5.54 0.2
 10 -6 5 5.64 0.2
 -10 6 5 5.67 0.2
 10 -6 5 5.87 0.21
 -10 -6 -5 5.93 0.2
 10 -6 -6 1.31 0.09
 -10 -6 6 1.42 0.09
 -10 6 -6 1.37 0.09
 10 -6 -6 1.34 0.08
 -10 -6 6 1.42 0.09
 -10 6 6 1.36 0.08
 10 -6 6 1.36 0.09
 -10 -6 -6 1.32 0.09
 -10 6 6 1.4 0.08
 10 -6 6 1.37 0.08
 -10 -6 7 1.66 0.1
 -10 -6 7 1.59 0.1
 -10 6 -7 1.41 0.1
 -10 6 7 1.42 0.09
 -10 -6 -7 1.73 0.1
 10 -6 7 1.64 0.1
 -10 -6 8 0.35 0.06
 -10 -6 8 0.29 0.06
 -10 6 -8 0.33 0.06
 10 -6 8 0.37 0.07
 -10 6 8 0.35 0.06
 -10 -6 -8 0.33 0.06
 10 7 0 26.95 0.69
 10 -7 0 25.21 0.74
 10 -7 0 25.65 0.74
 -10 7 0 26.32 0.69
 -10 -7 0 26.12 0.72
 -10 -7 1 4.21 0.15
 10 -7 -1 4.33 0.15
 10 7 1 4.27 0.14
 -10 7 -1 4.17 0.14
 10 -7 -1 4.01 0.16
 -10 7 1 4.19 0.14
 10 -7 1 4.1 0.15
 -10 -7 -1 4.39 0.14
 10 -7 1 3.81 0.15
 10 7 -1 4.26 0.14
 -10 -7 -1 4.35 0.14
 10 -7 -2 4.53 0.17
 -10 -7 2 4.69 0.17
 10 -7 -2 4.92 0.17
 -10 -7 2 4.88 0.16
 -10 7 -2 4.77 0.16
 10 -7 2 4.75 0.17
 -10 -7 -2 4.75 0.16
 -10 7 2 4.61 0.15
 10 -7 2 4.8 0.17
 10 7 -2 4.81 0.15
 10 -7 -3 0.37 0.04
 -10 7 -3 0.41 0.05
 -10 -7 3 0.4 0.05
 10 -7 -3 0.4 0.05
 -10 -7 3 0.41 0.04
 -10 7 3 0.38 0.04
 10 7 -3 0.38 0.04
 10 -7 3 0.43 0.05
 10 -7 3 0.45 0.05
 -10 -7 -3 0.41 0.04
 -10 7 -4 12.87 0.38
 -10 -7 4 12.53 0.4
 10 -7 -4 12.51 0.39
 -10 -7 4 13.33 0.39
 10 -7 -4 13.08 0.39
 -10 7 4 12.8 0.36
 10 -7 4 11.97 0.4
 -10 -7 -4 12.65 0.37
 10 -7 4 12.64 0.39
 -10 -7 5 3.01 0.14
 -10 -7 5 3.05 0.13
 10 -7 -5 2.95 0.12
 10 -7 -5 3 0.13
 10 -7 -5 3.07 0.13
 -10 7 -5 3.19 0.14
 10 -7 5 2.91 0.13
 10 -7 5 3.18 0.14
 -10 -7 -5 3.08 0.13
 -10 7 5 2.96 0.12
 -10 -7 6 5.21 0.2
 10 -7 -6 4.5 0.18
 -10 7 -6 4.98 0.19
 10 -7 -6 4.54 0.18
 -10 -7 6 5.05 0.19
 10 -7 6 4.65 0.18
 -10 7 6 4.37 0.17
 10 -7 6 5.21 0.2
 -10 -7 -6 4.89 0.18
 -10 7 6 4.61 0.18
 -10 7 -7 0.2 0.06
 -10 -7 7 0.2 0.06
 -10 -7 7 0.18 0.05
 -10 7 7 0.27 0.05
 -10 -7 -7 0.29 0.06
 10 -7 7 0.25 0.06
 -10 -7 8 2.36 0.13
 -10 7 -8 2.01 0.12
 -10 -7 8 2.4 0.13
 10 -7 8 2.08 0.13
 -10 -7 -8 2.44 0.13
 10 8 0 0.43 0.04
 10 -8 0 0.4 0.04
 -10 -8 0 0.38 0.04
 -10 8 0 0.36 0.04
 10 -8 0 0.41 0.05
 -10 8 -1 9.13 0.28
 10 8 1 9.28 0.27
 10 -8 -1 8.91 0.3
 -10 -8 1 9.65 0.29
 10 -8 -1 9.74 0.29
 10 8 -1 9.38 0.27
 -10 -8 -1 9.14 0.27
 10 -8 1 9.44 0.29
 10 -8 1 8.99 0.3
 -10 8 1 9.23 0.28
 -10 -8 -1 9.54 0.28
 10 -8 -2 27.13 0.76
 10 -8 -2 25.45 0.76
 -10 8 -2 27.51 0.72
 -10 -8 2 25.99 0.76
 10 -8 2 27.77 0.77
 -10 -8 -2 26.94 0.71
 10 8 -2 27.8 0.71
 -10 8 2 25.71 0.71
 10 -8 2 26.73 0.77
 10 -8 -3 3.83 0.15
 -10 8 -3 3.71 0.14
 -10 -8 3 3.47 0.15
 10 -8 -3 3.78 0.14
 -10 8 3 3.53 0.13
 10 8 -3 3.94 0.13
 10 -8 3 3.66 0.15
 -10 -8 -3 3.83 0.14
 10 -8 3 3.87 0.15
 -10 -8 4 8.52 0.29
 -10 8 -4 8.6 0.28
 10 -8 -4 8.38 0.29
 10 -8 -4 8.51 0.28
 -10 -8 4 8.83 0.29
 10 -8 4 8.6 0.29
 10 -8 4 9.17 0.29
 -10 -8 -4 8.53 0.27
 -10 8 4 8.78 0.26
 -10 -8 5 1.1 0.08
 10 -8 -5 1.05 0.07
 -10 -8 5 0.97 0.07
 10 -8 -5 1.03 0.07
 -10 8 -5 0.99 0.08
 10 -8 5 1.15 0.08
 -10 8 5 1.1 0.07
 10 -8 5 1.01 0.07
 -10 -8 -5 1 0.08
 -10 8 -6 1.84 0.11
 -10 -8 6 1.98 0.12
 -10 -8 6 1.8 0.1
 10 -8 6 1.85 0.11
 -10 -8 -6 2.16 0.11
 10 -8 6 1.75 0.1
 -10 -8 7 0.13 0.06
 -10 8 -7 0.19 0.06
 -10 -8 7 0.18 0.05
 -10 -8 -7 0.2 0.06
 10 -8 7 0.25 0.06
 10 -8 7 0.18 0.05
 -10 -8 8 4.05 0.18
 -10 8 -8 4.01 0.18
 -10 -8 8 4.05 0.19
 10 -8 8 3.94 0.19
 -10 -8 -8 4.14 0.18
 -10 9 0 0.64 0.05
 10 -9 0 0.61 0.06
 10 -9 0 0.6 0.05
 10 9 0 0.58 0.05
 -10 -9 0 0.51 0.05
 10 -9 -1 1.38 0.07
 -10 9 -1 1.29 0.08
 -10 -9 1 1.25 0.08
 10 -9 -1 1.37 0.08
 10 9 1 1.42 0.07
 10 -9 1 1.29 0.08
 10 9 -1 1.38 0.07
 10 -9 1 1.52 0.08
 -10 9 1 1.23 0.07
 10 -9 -2 0.57 0.05
 10 -9 -2 0.5 0.06
 -10 9 -2 0.65 0.06
 -10 -9 2 0.55 0.06
 10 9 2 0.65 0.05
 10 -9 2 0.61 0.05
 10 9 -2 0.6 0.05
 -10 9 2 0.57 0.05
 -10 -9 -2 0.56 0.05
 10 -9 2 0.52 0.06
 10 -9 -3 1.42 0.09
 -10 -9 3 1.44 0.09
 -10 9 -3 1.38 0.08
 10 -9 -3 1.31 0.08
 10 9 -3 1.33 0.07
 10 -9 3 1.36 0.08
 10 -9 3 1.38 0.09
 -10 9 3 1.38 0.08
 -10 -9 -3 1.44 0.08
 -10 -9 4 3.43 0.15
 10 -9 -4 3.52 0.15
 -10 9 -4 3.55 0.15
 10 -9 4 3.63 0.15
 -10 -9 -4 3.55 0.14
 10 -9 4 3.39 0.15
 -10 9 4 3.63 0.14
 -10 -9 5 0.29 0.05
 10 -9 -5 0.36 0.05
 -10 9 -5 0.35 0.06
 -10 9 5 0.36 0.05
 10 -9 5 0.29 0.05
 10 -9 5 0.43 0.06
 -10 -9 -5 0.43 0.06
 -10 -9 6 0.51 0.07
 -10 9 -6 0.65 0.07
 10 -9 6 0.66 0.07
 -10 -9 -6 0.5 0.07
 10 -9 6 0.62 0.07
 -10 -9 7 0.46 0.07
 -10 9 -7 0.43 0.06
 -10 -9 7 0.43 0.07
 10 -9 7 0.39 0.07
 10 -9 7 0.33 0.06
 -10 -9 -7 0.45 0.07
 10 -10 0 0.01 0.02
 -10 10 0 0 0.01
 10 -10 0 0 0.01
 -10 -10 0 0.02 0.01
 10 10 0 0 0.01
 -10 10 -1 0.17 0.04
 10 -10 -1 0.17 0.04
 10 10 1 0.19 0.04
 -10 -10 1 0.16 0.04
 10 -10 -1 0.1 0.03
 10 -10 1 0.13 0.03
 10 -10 1 0.09 0.04
 10 10 -1 0.16 0.04
 -10 10 1 0.1 0.04
 10 -10 -2 3.22 0.14
 -10 -10 2 3.26 0.14
 -10 10 -2 3.23 0.14
 10 10 2 3.36 0.13
 10 10 -2 3.33 0.13
 10 -10 2 3.44 0.15
 -10 10 2 3.07 0.13
 10 -10 2 3.12 0.13
 10 10 3 0.76 0.06
 10 -10 -3 0.76 0.07
 -10 -10 3 0.91 0.07
 -10 10 -3 0.84 0.07
 -10 10 3 0.67 0.06
 -10 -10 -3 0.75 0.07
 10 10 -3 0.78 0.06
 10 -10 3 0.95 0.08
 10 -10 3 0.79 0.06
 -10 -10 4 4.14 0.17
 -10 10 -4 4.11 0.17
 10 -10 -4 3.68 0.16
 10 -10 4 4.08 0.17
 -10 10 4 3.98 0.15
 10 -10 4 4.05 0.17
 -10 -10 -4 4.16 0.16
 -10 10 -5 1.76 0.11
 -10 -10 5 1.85 0.11
 10 -10 5 1.66 0.11
 -10 -10 -5 1.79 0.11
 -10 10 5 1.73 0.1
 10 -10 5 1.98 0.11
 -10 10 -6 1 0.09
 -10 -10 6 1.02 0.09
 -10 -10 -6 1.12 0.09
 10 -10 6 0.97 0.08
 10 -10 6 1.05 0.09
 -10 -11 0 1.72 0.09
 10 11 0 1.71 0.09
 -10 11 0 1.78 0.1
 10 -11 0 1.66 0.1
 -10 -11 1 5.46 0.2
 10 11 1 5.57 0.2
 -10 11 -1 6.36 0.21
 10 -11 -1 5.54 0.21
 10 -11 1 5.02 0.19
 10 11 -1 5.63 0.19
 -10 11 1 5.6 0.2
 10 -11 1 5.92 0.22
 10 11 2 3.38 0.14
 10 -11 -2 3.58 0.15
 -10 -11 2 3.44 0.15
 -10 11 -2 3.66 0.15
 10 11 -2 3.2 0.13
 10 -11 2 3.17 0.14
 10 -11 2 3.47 0.16
 -10 11 2 3.35 0.14
 10 11 3 3.22 0.14
 -10 -11 3 3.38 0.15
 10 -11 -3 3.11 0.15
 -10 11 -3 3.45 0.15
 10 -11 3 3.12 0.14
 -10 -11 -3 3.35 0.14
 10 11 -3 3 0.14
 -10 11 3 2.93 0.13
 10 -11 3 3.24 0.15
 10 11 4 3.4 0.15
 -10 11 -4 3.58 0.16
 10 -11 -4 3.27 0.15
 -10 -11 4 3.62 0.16
 10 -11 4 3.34 0.15
 -10 -11 -4 3.47 0.15
 10 -11 4 3.33 0.16
 -10 11 4 3.24 0.14
 -10 -11 5 0.86 0.09
 -10 11 -5 0.71 0.08
 10 -11 5 1.03 0.08
 -10 11 5 0.89 0.07
 -10 -11 -5 1.01 0.08
 10 -11 5 0.91 0.08
 -10 -11 6 1.19 0.1
 -10 11 -6 1.36 0.1
 -10 -11 -6 1.29 0.1
 10 -11 6 1.38 0.1
 10 -11 6 1.18 0.09
 -10 12 0 1.27 0.09
 10 12 0 1.37 0.09
 10 -12 0 1.47 0.1
 10 -12 -1 0.52 0.06
 -10 -12 1 0.47 0.06
 -10 12 -1 0.64 0.07
 10 12 1 0.5 0.06
 10 -12 1 0.53 0.07
 -10 12 1 0.52 0.06
 10 12 -1 0.59 0.06
 10 -12 -2 0.95 0.08
 10 12 2 0.89 0.08
 -10 -12 2 0.97 0.08
 -10 12 -2 0.95 0.08
 -10 12 2 0.9 0.08
 10 -12 2 0.92 0.08
 10 12 -2 0.85 0.07
 10 12 3 1.03 0.08
 10 -12 -3 1.19 0.09
 -10 12 -3 1.09 0.09
 -10 -12 3 1.12 0.09
 -10 12 3 1.1 0.08
 10 -12 3 1.12 0.09
 -10 12 -4 1.67 0.11
 -10 -12 4 1.66 0.11
 10 12 4 1.56 0.1
 10 -12 4 1.71 0.1
 -10 12 4 1.61 0.1
 10 -12 4 1.86 0.11
 -10 -12 -4 1.82 0.11
 10 12 5 0.54 0.07
 -10 12 -5 0.51 0.07
 -10 -12 5 0.58 0.08
 -10 12 5 0.49 0.06
 -10 -12 -5 0.56 0.07
 10 -12 5 0.48 0.07
 10 -12 5 0.58 0.07
 -10 13 0 1.66 0.1
 10 13 0 1.49 0.09
 10 -13 0 1.46 0.1
 -10 13 -1 4.19 0.17
 10 -13 -1 3.88 0.17
 -10 -13 1 3.64 0.16
 10 13 1 3.88 0.16
 10 13 -1 3.65 0.16
 10 -13 1 4.15 0.18
 -10 13 1 3.91 0.16
 -10 13 -2 1.45 0.1
 -10 -13 2 1.36 0.09
 10 -13 -2 1.6 0.1
 10 13 2 1.47 0.1
 -10 13 2 1.45 0.1
 10 -13 2 1.52 0.1
 10 13 -2 1.36 0.09
 -10 -13 3 2.38 0.13
 10 -13 -3 2.24 0.13
 -10 13 -3 2.37 0.13
 10 13 3 2.29 0.12
 10 -13 3 2.44 0.14
 -10 13 3 2.44 0.12
 10 13 4 1 0.09
 -10 -13 4 0.95 0.09
 -10 13 -4 1.15 0.1
 -10 13 4 0.97 0.08
 10 -13 4 0.88 0.09
 10 -14 0 0.53 0.07
 -10 14 0 0.61 0.07
 10 14 0 0.43 0.06
 10 -14 -1 0.47 0.07
 10 14 1 0.43 0.06
 -10 14 -1 0.41 0.07
 -10 14 1 0.55 0.07
 10 14 -1 0.43 0.07
 10 -14 1 0.42 0.07
 -10 14 -2 0.34 0.07
 10 14 2 0.48 0.07
 10 -14 -2 0.45 0.07
 -10 -14 2 0.36 0.06
 10 -14 2 0.39 0.07
 -10 14 2 0.33 0.07
 11 0 0 0.02 0.01
 11 0 0 0.04 0.02
 11 0 1 0.04 0.02
 -11 0 1 0.04 0.02
 11 0 -1 0.02 0.02
 -11 0 2 0 0.01
 11 0 2 0.03 0.02
 11 0 -2 -0.01 0.01
 11 0 2 -0.01 0.01
 -11 0 -2 -0.01 0.01
 11 0 -2 -0.01 0.01
 11 0 -3 0.05 0.03
 -11 0 -3 0 0.01
 11 0 3 0 0.01
 11 0 3 0.02 0.01
 -11 0 3 -0.01 0.01
 -11 0 -4 0.01 0.01
 11 0 -4 0.01 0.01
 -11 0 4 0.01 0.01
 11 0 4 0.04 0.03
 -11 0 5 0.01 0.01
 11 0 5 0.01 0.01
 11 0 -5 0 0.01
 -11 0 5 0.01 0.02
 -11 0 -5 0.01 0.01
 -11 0 -6 -0.01 0.01
 -11 0 6 0.02 0.02
 -11 0 6 0.01 0.01
 11 0 6 0.01 0.01
 11 0 7 0.07 0.04
 -11 0 7 -0.01 0.01
 -11 0 7 0.01 0.02
 -11 0 -7 0 0.01
 -11 0 8 0.07 0.05
 -11 0 -8 -0.02 0.02
 -11 0 8 0 0.01
 11 0 8 0 0.01
 11 0 9 0.13 0.05
 -11 0 9 -0.01 0.01
 -11 0 -9 -0.03 0.02
 11 1 0 83.91 2.21
 11 1 0 80.93 2.24
 -11 1 0 84.55 2.07
 11 -1 0 82.77 2.21
 -11 -1 0 82.29 2.21
 -11 -1 0 79.31 2.06
 11 -1 0 84.61 2.25
 11 -1 -1 7.69 0.23
 11 1 1 7.78 0.23
 11 1 1 7.21 0.22
 -11 -1 1 7.31 0.23
 -11 1 -1 7.91 0.21
 11 -1 -1 7.68 0.23
 11 -1 1 7.51 0.23
 -11 1 1 7.22 0.19
 -11 -1 -1 7.74 0.22
 11 -1 1 7.62 0.23
 11 1 -1 7.69 0.23
 11 1 -1 7.97 0.23
 -11 -1 -1 7.74 0.21
 11 -1 -2 10.38 0.31
 11 1 2 10.35 0.29
 11 -1 -2 9.56 0.31
 -11 -1 2 10.16 0.3
 11 1 2 10.06 0.3
 -11 1 -2 10.01 0.28
 -11 1 2 10.39 0.31
 -11 -1 -2 10.41 0.29
 -11 -1 -2 10.35 0.28
 11 1 -2 10.35 0.31
 -11 1 2 9.97 0.26
 11 -1 2 10.82 0.29
 11 1 3 53.85 1.44
 11 -1 -3 49.32 1.44
 -11 1 -3 53.37 1.34
 11 -1 -3 50.15 1.31
 11 1 3 53.65 1.4
 11 -1 -3 50.54 1.43
 -11 -1 3 51.22 1.42
 -11 -1 -3 53.65 1.34
 -11 1 3 52.72 1.43
 11 -1 3 52.39 1.4
 11 1 -3 53.81 1.45
 11 -1 3 52.96 1.44
 -11 1 -4 1.43 0.07
 11 -1 -4 1.32 0.08
 -11 -1 4 1.28 0.07
 11 1 4 1.24 0.06
 11 1 -4 1.58 0.08
 11 -1 4 1.28 0.07
 11 -1 4 1.26 0.05
 -11 -1 -4 1.42 0.07
 -11 -1 5 5.83 0.2
 -11 1 -5 5.68 0.19
 11 1 5 5.77 0.2
 11 -1 -5 5.4 0.21
 -11 -1 5 6.07 0.21
 11 1 -5 5.66 0.21
 11 -1 5 6.19 0.2
 -11 -1 -5 5.56 0.19
 -11 1 5 6.09 0.2
 -11 1 -6 5.46 0.19
 -11 -1 6 5.09 0.2
 11 1 6 4.95 0.19
 -11 -1 6 5.31 0.2
 11 -1 -6 5.5 0.2
 11 -1 6 5.4 0.2
 -11 1 6 5.38 0.2
 -11 -1 -6 5.43 0.19
 -11 1 6 5.19 0.19
 -11 -1 7 4.37 0.18
 11 1 7 4.11 0.16
 -11 1 -7 4.44 0.17
 -11 -1 7 4.27 0.17
 -11 1 7 4.48 0.18
 -11 1 7 4.14 0.17
 11 -1 7 3.99 0.17
 -11 -1 -7 4.24 0.17
 -11 -1 8 1.08 0.09
 -11 -1 8 1.01 0.08
 11 1 8 0.96 0.08
 -11 1 -8 1.01 0.09
 -11 1 8 1.05 0.08
 -11 1 8 1.07 0.09
 11 -1 8 1.12 0.08
 -11 -1 -8 1.05 0.08
 11 1 9 4.74 0.19
 -11 -1 9 4.69 0.19
 -11 -1 9 4.55 0.2
 -11 1 -9 4.35 0.19
 -11 1 9 4.91 0.2
 11 -1 9 4.63 0.2
 -11 -1 -9 4.5 0.19
 11 2 0 30.31 0.81
 -11 2 0 29.04 0.74
 11 -2 0 28.96 0.82
 -11 -2 0 28.55 0.74
 -11 -2 0 29.08 0.8
 11 -2 0 29.7 0.81
 11 -2 -1 35 0.96
 11 2 1 34.6 0.96
 -11 -2 1 34.59 0.96
 -11 2 -1 35.69 0.9
 11 -2 -1 34.96 0.98
 -11 2 1 34.49 0.88
 11 -2 1 34.19 0.97
 11 2 -1 34.98 0.97
 11 -2 1 34.9 0.96
 -11 -2 -1 35.82 0.95
 11 2 -1 35.61 0.88
 -11 -2 -1 36.3 0.89
 -11 -2 2 12.87 0.38
 -11 2 -2 13.15 0.35
 11 2 2 12.79 0.37
 11 -2 -2 12.5 0.38
 11 -2 -2 13.24 0.38
 -11 -2 -2 13.29 0.36
 -11 -2 -2 12.76 0.35
 11 -2 2 13.14 0.38
 11 -2 2 13.66 0.37
 -11 2 2 12.67 0.33
 11 2 -2 12.74 0.38
 -11 2 -3 16.85 0.46
 11 2 3 17.46 0.48
 -11 -2 3 17 0.49
 11 -2 -3 15.53 0.49
 11 -2 -3 16.87 0.43
 11 -2 -3 16.76 0.5
 -11 2 3 16.98 0.49
 11 -2 3 17.34 0.47
 11 2 -3 16.8 0.49
 11 -2 3 17.23 0.49
 -11 -2 -3 17.34 0.46
 -11 2 3 16.78 0.43
 11 2 4 5.68 0.19
 -11 -2 4 5.48 0.2
 11 -2 -4 5.92 0.2
 -11 2 -4 5.97 0.19
 -11 -2 4 5.88 0.2
 11 2 -4 5.64 0.2
 11 -2 4 5.94 0.18
 11 -2 4 5.88 0.2
 -11 2 4 5.82 0.2
 -11 -2 -4 5.86 0.19
 -11 -2 5 7.97 0.27
 11 2 5 7.86 0.25
 11 -2 -5 7.72 0.27
 -11 -2 5 8.12 0.27
 -11 2 -5 8.07 0.25
 -11 -2 -5 8.63 0.25
 -11 2 5 8.14 0.26
 11 -2 5 7.68 0.26
 -11 -2 6 1.77 0.1
 -11 -2 6 1.87 0.1
 11 -2 -6 1.69 0.1
 11 2 6 1.76 0.09
 -11 2 -6 1.73 0.1
 -11 -2 -6 1.73 0.09
 11 -2 6 1.71 0.1
 -11 2 6 1.88 0.1
 -11 2 6 1.85 0.1
 -11 -2 7 9.46 0.31
 -11 2 -7 9.66 0.3
 11 2 7 8.82 0.3
 -11 -2 7 9.36 0.32
 -11 -2 -7 9.55 0.3
 -11 2 7 8.78 0.3
 -11 2 7 9 0.31
 11 -2 7 9.63 0.32
 -11 2 -8 1.12 0.09
 11 2 8 1.06 0.08
 -11 -2 8 1.24 0.09
 -11 -2 8 1.15 0.09
 -11 2 8 1.1 0.09
 11 -2 8 1.17 0.09
 -11 2 8 1.04 0.08
 -11 -2 -8 1.27 0.09
 -11 2 -9 0.84 0.08
 -11 -2 9 1.07 0.08
 -11 -2 9 0.94 0.09
 -11 2 9 0.86 0.09
 11 -2 9 1.06 0.09
 -11 -2 -9 0.86 0.09
 -11 -3 0 4.02 0.13
 -11 3 0 4.14 0.12
 11 3 0 3.92 0.13
 11 -3 0 4.26 0.14
 11 -3 0 4.35 0.14
 -11 -3 0 4.14 0.12
 11 3 1 20.76 0.58
 11 -3 -1 20.49 0.59
 -11 -3 1 21.23 0.59
 -11 3 -1 21.17 0.55
 11 -3 -1 20.46 0.6
 11 3 -1 20.05 0.59
 11 -3 1 21.72 0.6
 -11 -3 -1 21.39 0.58
 11 3 -1 21.29 0.53
 11 -3 1 20.84 0.59
 -11 -3 -1 21.54 0.55
 -11 3 1 21.45 0.54
 -11 3 -2 11.44 0.32
 -11 -3 2 11.08 0.34
 11 3 2 11.79 0.33
 11 -3 -2 11.08 0.34
 11 -3 2 11.64 0.33
 -11 3 2 11.22 0.3
 11 3 -2 11.53 0.34
 11 3 -2 11.46 0.29
 11 -3 2 11.44 0.34
 -11 -3 -2 11.57 0.32
 -11 -3 -2 11.53 0.31
 11 3 3 22.44 0.63
 11 -3 -3 22.39 0.64
 11 -3 -3 21.4 0.65
 -11 -3 3 22.3 0.64
 -11 3 -3 22.77 0.6
 -11 -3 -3 23.26 0.6
 11 -3 3 22.7 0.63
 -11 3 3 22.3 0.58
 11 3 -3 23.51 0.65
 11 -3 3 22.42 0.65
 -11 -3 4 9.07 0.29
 11 3 4 9.29 0.28
 11 -3 -4 9.48 0.25
 -11 3 -4 9.16 0.28
 11 -3 -4 9.25 0.3
 11 -3 -4 9.23 0.29
 -11 -3 4 9.14 0.29
 11 -3 4 9.43 0.28
 11 -3 4 9.36 0.3
 -11 -3 -4 9.63 0.28
 -11 3 4 9.53 0.29
 11 -3 -5 4.13 0.16
 -11 -3 5 3.96 0.16
 11 -3 -5 3.86 0.16
 -11 -3 5 4.25 0.16
 11 3 5 4.42 0.15
 -11 3 -5 4.19 0.15
 -11 3 5 4.32 0.16
 -11 -3 -5 4.05 0.15
 11 -3 5 4.1 0.16
 11 -3 5 4.35 0.14
 -11 -3 6 0.03 0.02
 11 -3 -6 0.11 0.04
 -11 -3 6 0.07 0.04
 11 3 6 0.06 0.03
 -11 3 -6 0.09 0.04
 -11 3 6 0.04 0.02
 11 -3 6 0.12 0.04
 -11 -3 -6 0.06 0.04
 -11 3 6 0.07 0.03
 -11 -3 7 2.23 0.12
 -11 3 -7 1.92 0.11
 -11 -3 7 2.02 0.11
 -11 -3 -7 2.12 0.11
 -11 3 7 1.91 0.1
 -11 3 7 2.17 0.11
 11 -3 7 1.99 0.11
 -11 -3 8 0.02 0.02
 -11 -3 8 0.08 0.05
 -11 3 -8 0.17 0.06
 -11 -3 -8 0.09 0.05
 11 -3 8 0.14 0.06
 -11 3 8 0.12 0.05
 -11 -3 9 0.24 0.05
 -11 3 -9 0.27 0.06
 -11 -3 9 0.22 0.06
 -11 3 9 0.25 0.06
 11 -3 9 0.25 0.06
 -11 -3 -9 0.22 0.06
 11 -4 0 19.11 0.53
 -11 -4 0 18.7 0.52
 11 -4 0 18.57 0.54
 11 4 0 18.53 0.52
 -11 -4 0 18.96 0.49
 -11 4 0 18.62 0.49
 -11 4 -1 4.76 0.15
 11 -4 -1 4.52 0.16
 -11 -4 1 4.91 0.16
 11 -4 -1 4.49 0.16
 11 4 1 4.8 0.14
 11 4 -1 4.7 0.15
 -11 -4 -1 5 0.15
 11 -4 1 5.02 0.16
 11 4 -1 4.91 0.14
 -11 -4 -1 4.94 0.14
 11 -4 1 4.81 0.16
 -11 4 1 4.84 0.14
 11 -4 -2 9.49 0.3
 -11 4 -2 9.76 0.28
 11 4 2 9.88 0.28
 11 -4 -2 9.16 0.3
 -11 -4 2 9.81 0.3
 -11 4 2 9.74 0.26
 11 4 -2 10.08 0.26
 11 4 -2 9.77 0.29
 11 -4 2 10.05 0.3
 -11 -4 -2 10.01 0.27
 -11 -4 -2 9.93 0.27
 11 -4 2 9.58 0.29
 -11 4 -3 0.99 0.06
 -11 -4 3 0.97 0.06
 11 4 3 1 0.04
 -11 -4 3 0.9 0.06
 11 -4 -3 0.92 0.06
 11 -4 -3 0.87 0.06
 11 -4 3 0.87 0.06
 -11 -4 -3 0.93 0.05
 11 4 -3 1.02 0.06
 11 -4 3 0.98 0.06
 -11 4 3 0.99 0.04
 -11 4 -4 4.91 0.17
 11 -4 -4 5.03 0.18
 11 -4 -4 5.27 0.15
 11 -4 -4 4.81 0.18
 11 4 4 5.18 0.16
 -11 -4 4 5.28 0.18
 -11 -4 4 4.72 0.18
 -11 -4 -4 4.94 0.17
 -11 4 4 4.82 0.18
 11 -4 4 4.7 0.18
 11 -4 4 4.94 0.17
 11 -4 -5 0.2 0.04
 11 -4 -5 0.18 0.04
 -11 -4 5 0.19 0.04
 -11 4 -5 0.17 0.04
 -11 -4 5 0.16 0.04
 11 -4 5 0.14 0.03
 -11 -4 -5 0.24 0.04
 -11 4 5 0.24 0.04
 11 -4 5 0.24 0.05
 -11 4 -6 5.05 0.18
 11 -4 -6 5.01 0.19
 -11 -4 6 4.81 0.19
 -11 -4 6 4.95 0.19
 -11 4 6 4.82 0.18
 -11 4 6 4.82 0.19
 -11 -4 -6 4.96 0.18
 11 -4 6 5.16 0.19
 -11 -4 7 1.62 0.1
 -11 -4 7 1.54 0.1
 -11 4 -7 1.68 0.1
 -11 4 7 1.55 0.1
 -11 -4 -7 1.78 0.1
 11 -4 7 1.63 0.1
 -11 4 7 1.53 0.09
 -11 -4 8 -0.01 0.02
 -11 4 -8 0.02 0.02
 -11 -4 8 -0.02 0.01
 -11 -4 -8 0.01 0.02
 -11 4 8 0.01 0.02
 11 -4 8 0.01 0.02
 -11 -4 9 0.46 0.07
 -11 -4 9 0.49 0.07
 -11 4 -9 0.34 0.07
 -11 -4 -9 0.54 0.07
 11 -4 9 0.56 0.07
 -11 4 9 0.49 0.07
 -11 -5 0 20.95 0.55
 11 -5 0 21.14 0.6
 11 5 0 21.4 0.55
 11 -5 0 20 0.6
 -11 5 0 21.09 0.55
 -11 -5 0 21.13 0.58
 11 5 0 21.26 0.58
 -11 5 -1 15.44 0.42
 11 -5 -1 15.61 0.45
 -11 -5 1 14.92 0.44
 11 5 1 15.1 0.43
 11 -5 -1 15.61 0.45
 -11 -5 -1 15.89 0.43
 -11 -5 -1 15.59 0.41
 11 -5 1 14.55 0.45
 11 5 -1 15.64 0.44
 -11 5 1 15.12 0.41
 11 -5 1 15.56 0.45
 11 5 -1 16.02 0.41
 11 -5 -2 2.24 0.1
 -11 5 -2 2.42 0.09
 -11 -5 2 2.49 0.09
 -11 -5 2 2.37 0.1
 11 -5 -2 2.3 0.1
 11 -5 2 2.29 0.1
 -11 -5 -2 2.27 0.09
 -11 5 2 2.31 0.08
 11 -5 2 2.5 0.1
 11 5 -2 2.42 0.08
 -11 -5 3 1.02 0.06
 -11 -5 3 1.23 0.06
 -11 5 -3 1.05 0.06
 11 -5 -3 0.93 0.06
 11 -5 -3 0.98 0.06
 -11 -5 -3 1.02 0.06
 -11 5 3 1.01 0.05
 11 -5 3 1.16 0.06
 11 5 -3 1.05 0.05
 -11 -5 4 6.5 0.23
 -11 5 -4 6.81 0.22
 11 -5 -4 7.32 0.2
 -11 -5 4 6.75 0.23
 11 -5 -4 7.29 0.24
 11 -5 -4 6.76 0.23
 -11 -5 -4 7.17 0.22
 11 -5 4 6.59 0.23
 11 -5 4 6.78 0.22
 -11 5 4 7.05 0.2
 11 -5 -5 13.94 0.42
 -11 -5 5 13.95 0.43
 -11 -5 5 13.75 0.42
 11 -5 -5 14.11 0.43
 -11 5 -5 14.15 0.4
 -11 5 5 13.28 0.42
 11 -5 5 13.64 0.43
 -11 -5 -5 14.06 0.4
 11 -5 5 13.21 0.41
 -11 5 -6 1.32 0.09
 -11 -5 6 1.25 0.09
 11 -5 -6 1.33 0.08
 11 -5 -6 1.21 0.08
 -11 -5 6 1.24 0.08
 -11 5 6 1.38 0.08
 11 -5 6 1.36 0.08
 11 -5 6 1.26 0.09
 -11 -5 -6 1.33 0.09
 -11 5 -7 3.55 0.16
 -11 -5 7 3.59 0.16
 -11 -5 7 3.45 0.16
 11 -5 7 3.62 0.16
 -11 5 7 3.36 0.14
 -11 -5 -7 3.45 0.15
 -11 5 7 3.5 0.15
 -11 5 -8 2.18 0.12
 -11 -5 8 1.98 0.12
 -11 -5 8 1.87 0.12
 -11 5 8 2.03 0.12
 11 -5 8 2.03 0.12
 -11 -5 -8 1.93 0.12
 11 6 0 4.91 0.15
 -11 6 0 4.7 0.15
 11 -6 0 4.58 0.16
 11 -6 0 4.25 0.16
 -11 -6 0 4.68 0.15
 11 -6 -1 4.75 0.16
 -11 -6 1 4.23 0.16
 11 -6 -1 4.61 0.17
 -11 -6 1 4.69 0.14
 -11 6 -1 4.6 0.15
 11 -6 1 4.38 0.16
 -11 -6 -1 4.79 0.15
 -11 6 1 4.5 0.15
 11 6 -1 4.96 0.14
 -11 -6 -1 4.89 0.15
 11 -6 1 4.48 0.17
 11 -6 -2 11.26 0.35
 -11 -6 2 12.07 0.34
 -11 -6 2 10.85 0.35
 -11 6 -2 11.77 0.33
 11 -6 -2 11.31 0.35
 11 -6 2 11.44 0.35
 11 -6 2 11.18 0.35
 -11 -6 -2 11.46 0.32
 -11 6 2 11.22 0.32
 11 6 -2 11.91 0.31
 11 -6 -3 41.21 1.16
 -11 6 -3 42.45 1.09
 -11 -6 3 40.06 1.15
 -11 -6 3 43.48 1.16
 11 -6 -3 40.53 1.17
 -11 -6 -3 42.59 1.08
 -11 6 3 41.46 1.07
 11 6 -3 42.38 1.07
 11 -6 3 42.73 1.15
 11 -6 3 39.71 1.17
 11 -6 -4 5.49 0.2
 -11 6 -4 5.5 0.19
 -11 -6 4 5.51 0.2
 -11 -6 4 5.47 0.19
 11 -6 -4 5.61 0.2
 11 -6 4 5.31 0.2
 -11 -6 -4 5.38 0.18
 -11 6 4 5.57 0.17
 11 -6 4 5.21 0.19
 -11 -6 5 6.52 0.22
 11 -6 -5 6.28 0.22
 -11 -6 5 6.49 0.23
 11 -6 -5 6.24 0.22
 -11 6 -5 6.39 0.22
 11 -6 5 6.33 0.23
 -11 -6 -5 6.23 0.21
 -11 6 5 6.14 0.22
 -11 6 5 6.53 0.2
 11 -6 5 6.13 0.21
 -11 -6 6 3.03 0.14
 11 -6 -6 2.97 0.14
 -11 -6 6 3.35 0.14
 -11 6 -6 3.22 0.14
 11 -6 -6 3.04 0.14
 -11 6 6 3.02 0.13
 11 -6 6 3.28 0.15
 -11 -6 -6 3.23 0.14
 11 -6 6 3.07 0.13
 -11 6 -7 3.72 0.16
 -11 -6 7 3.84 0.17
 -11 -6 7 3.7 0.16
 -11 -6 -7 3.8 0.16
 11 -6 7 3.64 0.17
 -11 6 7 3.45 0.16
 -11 6 -8 0.04 0.02
 -11 -6 8 0.1 0.05
 -11 -6 8 0.02 0.02
 -11 -6 -8 0.04 0.02
 11 -6 8 0.03 0.02
 -11 6 8 0.11 0.05
 11 7 0 1.8 0.08
 11 -7 0 1.87 0.09
 11 -7 0 1.93 0.09
 -11 -7 0 1.95 0.08
 -11 7 0 1.98 0.08
 -11 7 -1 3.44 0.12
 11 7 1 3.33 0.12
 -11 -7 1 3.44 0.13
 11 -7 -1 3.27 0.13
 11 -7 -1 3.56 0.13
 -11 -7 -1 3.39 0.12
 -11 7 1 3.32 0.12
 11 -7 1 3.28 0.13
 11 -7 1 3.14 0.13
 11 7 -1 3.45 0.12
 -11 -7 -1 3.35 0.12
 11 -7 -2 3.34 0.13
 11 -7 -2 3.06 0.13
 -11 7 -2 3.12 0.12
 -11 -7 2 2.97 0.13
 -11 -7 -2 3.1 0.12
 11 -7 2 3.16 0.13
 11 7 -2 3.34 0.11
 11 -7 2 3.25 0.13
 -11 7 2 3 0.11
 -11 7 -3 12.45 0.36
 -11 -7 3 11.77 0.38
 -11 -7 3 12.98 0.36
 11 -7 -3 12.11 0.38
 11 -7 -3 12.32 0.38
 11 -7 3 12.02 0.38
 11 -7 3 11.72 0.38
 -11 7 3 12.19 0.34
 -11 -7 -3 12.3 0.35
 -11 -7 4 12.72 0.4
 11 -7 -4 12.88 0.4
 -11 -7 4 12.98 0.39
 11 -7 -4 12.46 0.4
 -11 7 -4 13.57 0.38
 -11 7 4 12.97 0.36
 11 -7 4 12.86 0.41
 11 -7 4 12.41 0.39
 -11 -7 -4 13.03 0.38
 -11 -7 5 0.22 0.04
 -11 7 -5 0.24 0.05
 -11 -7 5 0.26 0.05
 11 -7 -5 0.23 0.05
 11 -7 -5 0.28 0.05
 11 -7 5 0.25 0.04
 -11 -7 -5 0.22 0.05
 11 -7 5 0.3 0.05
 -11 7 5 0.24 0.04
 -11 7 -6 5.44 0.2
 -11 -7 6 5.27 0.2
 11 -7 -6 5.26 0.2
 11 -7 -6 5.17 0.2
 -11 -7 6 5.74 0.21
 -11 7 6 5.02 0.19
 11 -7 6 5.64 0.22
 11 -7 6 5.1 0.19
 -11 -7 -6 5.52 0.2
 -11 -7 7 2.01 0.11
 -11 7 -7 2.07 0.12
 -11 -7 7 2.05 0.12
 11 -7 7 2.11 0.12
 -11 7 7 2.01 0.11
 -11 -7 -7 2.19 0.12
 -11 -7 8 1.89 0.12
 -11 7 -8 1.89 0.12
 -11 -7 8 1.78 0.11
 11 -7 8 1.69 0.12
 -11 -7 -8 1.79 0.11
 11 -8 0 2.27 0.1
 -11 8 0 2.26 0.1
 11 8 0 2.29 0.09
 11 -8 0 2.31 0.11
 -11 -8 0 2.26 0.1
 -11 -8 1 0.59 0.05
 11 -8 -1 0.62 0.05
 11 -8 -1 0.63 0.05
 -11 8 -1 0.62 0.05
 11 8 1 0.56 0.05
 11 -8 1 0.59 0.05
 -11 8 1 0.6 0.05
 -11 -8 -1 0.65 0.04
 11 8 -1 0.64 0.05
 -11 -8 -1 0.65 0.05
 11 -8 1 0.53 0.06
 11 -8 -2 4.13 0.16
 -11 8 -2 4.32 0.16
 -11 -8 2 4.16 0.16
 11 -8 -2 4.13 0.16
 11 -8 2 4.2 0.16
 11 8 -2 4.36 0.14
 11 -8 2 4.22 0.16
 -11 -8 -2 4.31 0.15
 -11 8 2 4.26 0.15
 -11 -8 3 0.37 0.05
 -11 8 -3 0.47 0.05
 11 -8 -3 0.47 0.05
 11 -8 -3 0.38 0.05
 -11 -8 -3 0.53 0.05
 11 -8 3 0.49 0.05
 11 -8 3 0.5 0.05
 -11 8 3 0.37 0.04
 -11 8 -4 1.52 0.09
 -11 -8 4 1.55 0.09
 11 -8 -4 1.65 0.09
 11 -8 -4 1.52 0.09
 -11 -8 -4 1.53 0.09
 11 -8 4 1.5 0.09
 -11 8 4 1.54 0.08
 11 -8 4 1.47 0.09
 -11 8 -5 1.43 0.09
 -11 -8 5 1.21 0.08
 11 -8 -5 1.21 0.08
 -11 -8 5 1.33 0.09
 11 -8 -5 1.18 0.08
 -11 -8 -5 1.44 0.09
 11 -8 5 1.34 0.08
 11 -8 5 1.34 0.09
 -11 8 5 1.25 0.07
 -11 -8 6 0.02 0.02
 -11 8 -6 0.03 0.02
 -11 -8 6 0.07 0.04
 -11 -8 -6 0.1 0.05
 11 -8 6 0.02 0.02
 11 -8 6 0 0.02
 -11 8 6 0.02 0.02
 -11 -8 7 1.33 0.1
 -11 -8 7 1.23 0.09
 -11 8 -7 1.19 0.09
 11 -8 7 1.21 0.1
 -11 -8 -7 1.24 0.09
 11 -9 0 0.06 0.03
 11 9 0 0.03 0.01
 11 -9 0 0.07 0.04
 -11 9 0 0.03 0.01
 -11 -9 0 0.12 0.03
 -11 9 -1 3.8 0.14
 11 -9 -1 3.89 0.15
 -11 -9 1 3.65 0.14
 11 -9 -1 3.89 0.16
 11 9 1 3.78 0.14
 11 -9 1 3.72 0.15
 11 9 -1 3.91 0.14
 -11 9 1 3.63 0.14
 11 -9 1 3.66 0.14
 -11 9 -2 1.81 0.09
 -11 -9 2 1.71 0.09
 11 9 2 1.76 0.09
 11 -9 -2 1.74 0.1
 11 -9 -2 1.73 0.09
 11 9 -2 1.76 0.08
 -11 9 2 1.69 0.09
 -11 -9 -2 1.7 0.09
 11 -9 2 1.87 0.1
 11 -9 2 1.67 0.09
 11 -9 -3 0.98 0.07
 11 -9 -3 0.91 0.06
 -11 9 -3 0.99 0.07
 -11 -9 3 0.95 0.07
 -11 -9 -3 1 0.07
 11 -9 3 1.02 0.08
 -11 9 3 0.78 0.06
 11 -9 3 0.93 0.07
 -11 9 -4 1.6 0.1
 11 -9 -4 1.42 0.09
 -11 -9 4 1.55 0.1
 11 -9 4 1.59 0.09
 11 -9 4 1.67 0.1
 -11 -9 -4 1.69 0.09
 -11 9 4 1.54 0.08
 11 -9 -5 7.37 0.27
 -11 9 -5 8.06 0.27
 -11 -9 5 7.97 0.28
 11 -9 5 8 0.27
 -11 -9 -5 8 0.26
 -11 9 5 7.17 0.24
 11 -9 5 8.06 0.28
 -11 -9 6 1.51 0.11
 -11 9 -6 1.4 0.1
 11 -9 6 1.56 0.1
 -11 -9 -6 1.42 0.1
 11 -9 6 1.57 0.1
 -11 -9 7 2.19 0.13
 -11 9 -7 2.27 0.13
 -11 -9 -7 2.15 0.12
 11 -9 7 2.23 0.12
 11 -9 7 2.28 0.13
 11 -10 0 1.88 0.1
 -11 -10 0 1.72 0.09
 11 10 0 1.75 0.09
 11 -10 0 1.75 0.09
 -11 10 0 1.93 0.1
 11 -10 -1 7.22 0.25
 11 10 1 7.27 0.23
 -11 -10 1 7.09 0.24
 -11 10 -1 7.16 0.24
 11 -10 -1 6.44 0.23
 -11 10 1 7.3 0.23
 11 10 -1 6.89 0.22
 11 -10 1 7.5 0.26
 11 -10 1 7.06 0.24
 11 10 2 0.1 0.04
 -11 10 -2 0.12 0.04
 11 -10 -2 0.08 0.04
 -11 -10 2 0.09 0.04
 -11 10 2 0.07 0.04
 11 10 -2 0.13 0.04
 11 -10 2 0.08 0.04
 11 -10 2 0.12 0.04
 11 10 3 0.94 0.07
 11 -10 -3 0.99 0.08
 -11 -10 3 0.84 0.07
 -11 10 -3 1.25 0.08
 11 -10 3 0.87 0.07
 -11 10 3 0.91 0.07
 11 -10 3 1.1 0.08
 -11 -10 -3 1.02 0.07
 -11 10 -4 0.85 0.08
 -11 -10 4 0.66 0.07
 11 -10 -4 0.63 0.07
 -11 10 4 0.64 0.06
 11 -10 4 0.63 0.07
 -11 -10 -4 0.85 0.07
 11 -10 4 0.63 0.07
 -11 10 -5 0.32 0.06
 -11 -10 5 0.37 0.06
 11 -10 -5 0.31 0.06
 -11 10 5 0.29 0.05
 11 -10 5 0.42 0.06
 11 -10 5 0.35 0.06
 -11 -10 -5 0.24 0.06
 -11 -10 6 1.27 0.1
 -11 10 -6 1.11 0.09
 11 -10 6 1.23 0.09
 -11 -10 -6 1.3 0.09
 11 -10 6 1.1 0.09
 -11 11 0 0.57 0.06
 11 11 0 0.61 0.06
 11 -11 0 0.69 0.07
 -11 11 -1 0.55 0.06
 11 -11 -1 0.43 0.06
 -11 -11 1 0.33 0.05
 11 11 1 0.47 0.06
 11 -11 1 0.51 0.06
 11 -11 1 0.38 0.05
 11 11 -1 0.46 0.05
 -11 11 1 0.37 0.05
 11 -11 -2 1.41 0.09
 -11 -11 2 1.42 0.09
 -11 11 -2 1.42 0.09
 11 11 2 1.39 0.09
 11 -11 2 1.24 0.08
 11 -11 2 1.46 0.1
 11 11 -2 1.31 0.08
 -11 11 2 1.34 0.08
 -11 -11 3 2.05 0.11
 -11 11 -3 2.13 0.11
 11 -11 -3 1.93 0.11
 11 11 3 1.82 0.1
 11 -11 3 1.93 0.1
 -11 11 3 1.85 0.1
 -11 -11 -3 1.92 0.1
 11 -11 3 1.86 0.11
 -11 11 -4 2.24 0.12
 11 -11 -4 1.92 0.11
 -11 -11 4 2 0.12
 11 11 4 2.17 0.11
 11 -11 4 2.24 0.12
 -11 -11 -4 2.11 0.11
 -11 11 4 1.93 0.1
 11 -11 4 1.91 0.11
 -11 -11 5 1.96 0.12
 -11 11 -5 1.95 0.12
 11 -11 5 1.81 0.11
 -11 11 5 1.55 0.09
 -11 -11 -5 1.86 0.11
 11 -11 5 1.6 0.11
 -11 11 -6 2.44 0.14
 11 -11 6 2.29 0.13
 11 -11 6 2.52 0.13
 -11 -11 -6 2.67 0.14
 -11 12 0 2.23 0.11
 11 -12 0 2.14 0.12
 11 12 0 1.91 0.1
 -11 12 -1 4.46 0.17
 11 -12 -1 4.09 0.18
 -11 -12 1 3.66 0.16
 11 12 1 3.86 0.16
 -11 12 1 4.02 0.16
 11 12 -1 3.97 0.16
 11 -12 1 4.24 0.18
 11 -12 -2 0.32 0.06
 -11 -12 2 0.3 0.05
 -11 12 -2 0.23 0.06
 11 12 2 0.38 0.06
 -11 12 2 0.34 0.06
 11 -12 2 0.36 0.06
 11 12 3 1.41 0.09
 -11 -12 3 1.52 0.1
 -11 12 -3 1.54 0.1
 11 -12 -3 1.43 0.1
 11 -12 3 1.5 0.1
 -11 12 3 1.51 0.09
 11 -12 3 1.45 0.09
 11 -12 -4 0.54 0.07
 11 12 4 0.56 0.07
 -11 12 -4 0.63 0.08
 -11 -12 4 0.56 0.07
 11 -12 4 0.53 0.06
 11 -12 4 0.58 0.07
 -11 12 4 0.51 0.06
 -11 -12 -4 0.56 0.07
 -11 -12 5 5.02 0.22
 11 12 5 5.47 0.21
 -11 12 -5 5.71 0.22
 -11 -12 -5 5.83 0.22
 11 -12 5 5.24 0.22
 11 -12 5 5.46 0.21
 11 13 0 0.6 0.06
 11 -13 0 0.53 0.07
 -11 13 0 0.6 0.07
 11 13 1 7.96 0.27
 -11 13 -1 8.54 0.28
 11 -13 -1 8.27 0.3
 11 13 -1 8.38 0.27
 11 -13 1 8.24 0.3
 -11 13 1 8.13 0.28
 -11 -13 2 1.21 0.09
 -11 13 -2 1.09 0.09
 11 13 2 1.14 0.09
 11 -13 -2 1.14 0.09
 11 -13 2 1.07 0.09
 -11 13 2 1.27 0.09
 -11 -13 3 4.44 0.19
 -11 13 -3 4.68 0.19
 11 -13 -3 4.34 0.19
 11 13 3 4.65 0.19
 -11 13 3 4.64 0.18
 11 -13 3 4.57 0.2
 -11 14 0 14.37 0.43
 11 -14 0 13.67 0.46
 11 14 0 14.04 0.42
 11 14 1 3.78 0.16
 -11 14 -1 4.04 0.17
 11 -14 -1 3.83 0.18
 -11 14 1 3.8 0.17
 11 14 -1 3.95 0.17
 11 -14 1 3.92 0.18
 12 0 0 19.29 0.56
 12 0 0 20.66 0.55
 -12 0 0 19.09 0.5
 12 0 1 32.06 0.86
 -12 0 -1 31 0.8
 12 0 -1 31.34 0.88
 12 0 -1 31.55 0.87
 12 0 1 32.41 0.88
 -12 0 1 31.06 0.87
 12 0 2 17.46 0.48
 -12 0 2 16.37 0.48
 -12 0 -2 16.38 0.44
 12 0 2 15.9 0.46
 12 0 -2 16.92 0.49
 12 0 -2 17.01 0.48
 -12 0 3 7.65 0.26
 -12 0 -3 8.96 0.24
 12 0 3 8.17 0.24
 12 0 -3 8.06 0.26
 12 0 3 8.1 0.25
 12 0 4 4.8 0.16
 -12 0 4 4.39 0.16
 12 0 -4 4.46 0.17
 -12 0 -4 4.56 0.15
 -12 0 -5 11.58 0.34
 12 0 -5 12.01 0.37
 12 0 5 11.36 0.35
 -12 0 5 11.19 0.36
 -12 0 -6 11.11 0.34
 -12 0 6 11.27 0.35
 12 0 6 10.93 0.35
 -12 0 6 11.23 0.36
 12 0 7 7.42 0.26
 -12 0 -7 7.97 0.26
 -12 0 7 7.74 0.27
 -12 0 7 7.99 0.28
 -12 0 8 5.54 0.21
 -12 0 8 5.37 0.22
 -12 0 -8 5.44 0.21
 12 0 8 5.34 0.21
 12 0 9 0.08 0.05
 -12 0 9 0.02 0.02
 -12 0 -9 0.02 0.02
 -12 0 9 0.06 0.05
 12 1 0 0.78 0.04
 12 -1 0 0.8 0.05
 12 1 0 0.75 0.04
 -12 -1 0 0.74 0.04
 -12 -1 0 0.72 0.03
 12 -1 0 0.76 0.05
 -12 1 0 0.69 0.03
 -12 1 -1 4.87 0.14
 12 -1 -1 4.54 0.16
 12 1 1 4.72 0.15
 -12 -1 1 4.74 0.16
 12 1 1 4.85 0.16
 12 -1 -1 4.98 0.16
 12 -1 1 5.13 0.16
 12 1 -1 4.92 0.16
 -12 -1 -1 4.97 0.14
 -12 1 1 4.62 0.13
 -12 -1 -1 5.07 0.15
 12 -1 1 4.87 0.16
 12 1 -1 4.88 0.16
 12 1 2 4.9 0.15
 12 -1 -2 4.61 0.16
 12 -1 -2 4.39 0.16
 -12 -1 2 4.51 0.16
 -12 1 -2 4.88 0.14
 12 1 2 4.82 0.14
 -12 -1 -2 4.81 0.14
 12 1 -2 4.58 0.16
 12 -1 2 4.94 0.15
 12 -1 2 4.65 0.16
 -12 -1 -2 4.62 0.14
 -12 1 2 4.7 0.16
 12 1 3 8.63 0.26
 12 -1 -3 8.52 0.27
 12 -1 -3 8.23 0.27
 -12 -1 3 8.2 0.26
 -12 1 -3 8.43 0.24
 12 1 3 8.44 0.24
 12 -1 3 8.83 0.25
 12 1 -3 8.53 0.27
 -12 1 3 8.3 0.27
 -12 -1 -3 8.33 0.24
 12 -1 3 8.41 0.26
 -12 -1 4 1.17 0.07
 12 1 4 1.19 0.06
 -12 1 -4 1.26 0.07
 12 -1 -4 1.22 0.07
 12 -1 4 1.14 0.07
 -12 -1 -4 1.27 0.07
 12 -1 4 1.22 0.05
 12 1 -4 1.29 0.07
 -12 1 4 1.28 0.07
 -12 -1 5 0.31 0.04
 12 -1 -5 0.33 0.05
 12 1 5 0.28 0.04
 -12 1 -5 0.29 0.04
 -12 -1 5 0.32 0.04
 -12 -1 -5 0.35 0.04
 12 1 -5 0.28 0.05
 12 -1 5 0.38 0.04
 -12 1 5 0.34 0.05
 12 -1 -6 1.02 0.08
 -12 -1 6 1.03 0.07
 -12 1 -6 0.98 0.07
 -12 -1 6 0.91 0.07
 12 1 6 0.97 0.07
 -12 1 6 1 0.07
 -12 -1 -6 0.92 0.07
 12 -1 6 0.86 0.07
 -12 1 6 1 0.07
 -12 -1 7 3.23 0.15
 12 1 7 2.92 0.13
 -12 1 -7 3.37 0.14
 -12 -1 7 3.07 0.14
 12 -1 7 3.01 0.14
 -12 1 7 3.05 0.15
 -12 1 7 3.09 0.14
 -12 -1 -7 3.28 0.14
 12 1 8 1.62 0.1
 -12 -1 8 1.79 0.11
 -12 1 -8 1.71 0.11
 -12 -1 8 1.89 0.11
 -12 1 8 1.81 0.1
 -12 -1 -8 1.71 0.11
 -12 1 8 1.94 0.12
 12 -1 8 1.7 0.11
 -12 -1 9 0.69 0.08
 12 1 9 0.8 0.08
 -12 -1 9 0.79 0.07
 -12 1 -9 0.78 0.08
 -12 -1 -9 0.67 0.08
 -12 1 9 0.72 0.08
 12 -1 9 0.71 0.08
 12 -2 0 0.59 0.04
 12 2 0 0.6 0.04
 -12 -2 0 0.63 0.04
 -12 -2 0 0.61 0.03
 12 -2 0 0.6 0.04
 -12 2 0 0.58 0.03
 12 -2 -1 1.39 0.07
 -12 -2 1 1.45 0.07
 12 2 1 1.48 0.06
 -12 2 -1 1.5 0.06
 12 -2 -1 1.57 0.07
 12 -2 1 1.46 0.07
 -12 -2 -1 1.62 0.06
 -12 -2 -1 1.55 0.06
 12 -2 1 1.66 0.07
 -12 2 1 1.52 0.05
 12 2 -1 1.5 0.04
 12 2 -1 1.66 0.07
 -12 2 -2 2.77 0.1
 -12 -2 2 2.79 0.11
 12 2 2 2.97 0.1
 12 -2 -2 2.82 0.11
 12 -2 -2 2.76 0.11
 -12 -2 -2 3.01 0.1
 12 -2 2 3 0.1
 12 2 -2 2.79 0.11
 -12 2 2 2.95 0.08
 12 -2 2 3.13 0.11
 -12 -2 -2 3 0.09
 12 2 3 0.74 0.04
 -12 2 -3 0.76 0.05
 12 -2 -3 0.65 0.05
 12 -2 -3 0.68 0.05
 -12 -2 3 0.68 0.05
 -12 2 3 0.77 0.05
 12 -2 3 0.73 0.04
 12 -2 3 0.74 0.05
 -12 -2 -3 0.78 0.05
 12 2 -3 0.74 0.05
 12 -2 -4 3.96 0.15
 -12 2 -4 3.82 0.14
 12 -2 -4 3.69 0.15
 12 2 4 3.74 0.13
 -12 -2 4 3.75 0.15
 12 -2 4 4.11 0.13
 12 2 -4 3.94 0.15
 12 -2 4 3.77 0.15
 -12 -2 -4 3.96 0.14
 -12 2 4 3.91 0.15
 -12 2 -5 1.1 0.07
 12 2 5 0.96 0.06
 -12 -2 5 1.13 0.07
 -12 -2 5 1.06 0.07
 12 -2 -5 0.98 0.07
 -12 -2 -5 1.12 0.07
 12 -2 5 1.01 0.07
 -12 2 5 1.07 0.07
 -12 -2 6 6.38 0.23
 12 2 6 6.4 0.22
 -12 -2 6 6.7 0.23
 12 -2 -6 6.69 0.24
 -12 2 -6 6.57 0.22
 -12 2 6 6.28 0.23
 12 -2 6 6.66 0.23
 -12 2 6 6.5 0.23
 -12 -2 -6 6.38 0.22
 12 2 7 0.39 0.05
 -12 -2 7 0.42 0.06
 -12 -2 7 0.54 0.06
 -12 2 -7 0.48 0.06
 -12 2 7 0.45 0.06
 -12 -2 -7 0.39 0.06
 12 -2 7 0.49 0.06
 -12 2 7 0.49 0.06
 -12 -2 8 1.94 0.11
 -12 -2 8 2 0.12
 -12 2 -8 1.92 0.12
 -12 -2 -8 2 0.12
 -12 2 8 1.84 0.11
 12 -2 8 2.02 0.12
 -12 2 8 1.95 0.12
 -12 2 -9 0.96 0.08
 -12 -2 9 0.97 0.09
 -12 -2 9 0.94 0.08
 12 -2 9 1.12 0.09
 -12 -2 -9 1.05 0.09
 -12 2 9 1.05 0.09
 12 3 0 6.45 0.2
 -12 -3 0 6.58 0.18
 -12 -3 0 6.64 0.2
 12 -3 0 6.68 0.21
 -12 3 0 6.35 0.18
 12 -3 0 6.55 0.21
 -12 3 -1 13.53 0.37
 -12 -3 1 14.1 0.4
 12 -3 -1 13.21 0.41
 12 -3 -1 13.74 0.41
 12 3 1 14.12 0.39
 12 -3 1 13.94 0.41
 12 3 -1 14.07 0.4
 -12 -3 -1 13.34 0.36
 -12 3 1 13.32 0.36
 12 3 -1 13.92 0.35
 12 -3 1 14.44 0.4
 -12 -3 -1 14.12 0.39
 12 -3 -2 0.86 0.06
 -12 3 -2 0.96 0.05
 -12 -3 2 0.91 0.06
 12 3 2 1 0.04
 12 -3 -2 0.98 0.06
 -12 -3 -2 0.93 0.05
 12 3 -2 0.95 0.05
 -12 -3 -2 1.09 0.04
 12 -3 2 0.92 0.06
 12 -3 2 0.95 0.05
 -12 3 2 0.91 0.04
 -12 3 -3 9.4 0.27
 12 -3 -3 9.42 0.29
 -12 -3 3 8.44 0.29
 12 3 3 9.29 0.27
 12 -3 -3 9.31 0.29
 12 3 -3 10.08 0.29
 12 -3 3 8.88 0.29
 12 -3 3 8.94 0.28
 -12 -3 -3 9.74 0.27
 -12 3 3 8.94 0.25
 -12 -3 4 0.94 0.06
 -12 -3 4 0.94 0.06
 12 -3 -4 0.87 0.06
 -12 3 -4 1 0.06
 12 -3 -4 0.91 0.06
 12 3 4 0.98 0.05
 12 -3 4 0.95 0.05
 12 3 -4 1.03 0.07
 12 -3 4 0.94 0.06
 -12 3 4 0.99 0.06
 -12 -3 -4 1.02 0.06
 -12 -3 5 14.35 0.44
 12 3 5 14.78 0.43
 12 -3 -5 13.65 0.44
 -12 3 -5 14.45 0.42
 12 -3 -5 14.03 0.45
 -12 -3 5 14.35 0.44
 12 -3 5 14.7 0.45
 12 -3 5 15.25 0.42
 -12 -3 -5 15.22 0.42
 -12 3 5 14.49 0.44
 12 3 6 2.63 0.12
 12 -3 -6 2.62 0.13
 -12 -3 6 2.62 0.13
 -12 3 -6 2.74 0.12
 -12 -3 6 2.71 0.13
 -12 -3 -6 2.72 0.12
 -12 3 6 2.8 0.13
 12 -3 6 2.78 0.13
 -12 3 6 2.59 0.12
 -12 3 -7 1.85 0.11
 -12 -3 7 2.08 0.12
 -12 -3 7 2.1 0.11
 -12 3 7 1.9 0.1
 12 -3 7 2.02 0.11
 -12 3 7 2.08 0.11
 -12 -3 -7 1.92 0.11
 -12 3 -8 4.01 0.18
 -12 -3 8 4.15 0.18
 -12 -3 8 4.37 0.19
 -12 3 8 4.56 0.19
 -12 3 8 4.26 0.17
 -12 -3 -8 4.39 0.18
 12 -3 8 4.36 0.19
 -12 -3 9 1.02 0.09
 -12 3 -9 1.26 0.1
 -12 -3 9 1.11 0.1
 -12 -3 -9 1.09 0.09
 12 -3 9 1.17 0.09
 -12 3 9 1.19 0.09
 12 -4 0 5.26 0.17
 -12 4 0 4.98 0.15
 -12 -4 0 5.16 0.16
 12 -4 0 4.58 0.17
 -12 -4 0 5.08 0.14
 12 4 0 5.15 0.16
 -12 4 -1 42.69 1.08
 12 -4 -1 39.82 1.17
 12 -4 -1 42.25 1.16
 12 4 1 42.73 1.15
 -12 -4 1 41.39 1.15
 12 -4 1 42.64 1.18
 12 4 -1 41.49 1.16
 -12 4 1 43.4 1.07
 12 -4 1 41.24 1.16
 12 4 -1 43.85 1.07
 -12 -4 -1 43.69 1.14
 -12 -4 -1 42.09 1.08
 12 -4 -2 17.49 0.51
 12 -4 -2 17.15 0.5
 12 4 2 17.68 0.48
 -12 -4 2 16.8 0.5
 -12 4 -2 17.09 0.46
 -12 -4 -2 17.49 0.47
 12 -4 2 16.82 0.5
 12 4 -2 17.03 0.45
 -12 -4 -2 17.42 0.46
 12 4 -2 17.03 0.49
 12 -4 2 16.9 0.49
 -12 4 2 17.34 0.45
 -12 4 -3 1.68 0.08
 12 -4 -3 1.66 0.08
 -12 -4 3 1.41 0.08
 12 -4 -3 1.5 0.08
 -12 -4 3 1.48 0.07
 12 4 3 1.55 0.06
 -12 -4 -3 1.64 0.07
 -12 4 3 1.55 0.06
 12 -4 3 1.54 0.07
 12 4 -3 1.64 0.08
 -12 -4 4 9.45 0.3
 12 -4 -4 9.59 0.31
 12 -4 -4 9.4 0.3
 -12 4 -4 9.58 0.29
 -12 -4 4 9.59 0.3
 12 -4 4 8.94 0.3
 12 -4 4 9.66 0.29
 -12 -4 -4 9.83 0.28
 -12 4 4 9.32 0.3
 -12 -4 5 8.23 0.28
 12 -4 -5 8.73 0.28
 12 -4 -5 8.67 0.28
 -12 4 -5 8.4 0.26
 -12 -4 5 7.95 0.27
 12 -4 5 8.25 0.26
 -12 -4 -5 8.31 0.26
 -12 4 5 8.27 0.27
 12 -4 5 8.21 0.28
 -12 4 -6 1.25 0.08
 -12 -4 6 1.14 0.08
 -12 -4 6 1.26 0.09
 12 -4 -6 1.18 0.08
 -12 -4 -6 1.11 0.08
 -12 4 6 1.19 0.08
 12 -4 6 1.18 0.08
 -12 -4 7 8.11 0.28
 -12 -4 7 7.99 0.28
 -12 4 -7 8.2 0.27
 12 -4 7 7.85 0.28
 -12 4 7 8.14 0.28
 -12 4 7 7.57 0.27
 -12 -4 -7 7.93 0.27
 -12 4 -8 0.5 0.07
 -12 -4 8 0.5 0.07
 -12 -4 8 0.49 0.07
 -12 4 8 0.5 0.07
 12 -4 8 0.51 0.07
 -12 -4 -8 0.63 0.07
 -12 -4 9 0.42 0.07
 -12 -4 9 0.39 0.07
 -12 4 -9 0.44 0.07
 -12 4 9 0.5 0.07
 -12 -4 -9 0.54 0.07
 12 -4 9 0.43 0.07
 12 5 0 18.96 0.52
 12 -5 0 18.28 0.54
 -12 -5 0 18.65 0.49
 -12 -5 0 19.13 0.53
 -12 5 0 19.13 0.5
 12 -5 0 17.18 0.54
 12 5 0 19.44 0.49
 12 -5 -1 6.45 0.22
 -12 5 -1 6.76 0.2
 -12 -5 1 6.96 0.22
 12 -5 -1 6.51 0.22
 -12 -5 -1 6.97 0.2
 -12 -5 -1 6.81 0.2
 12 -5 1 6.6 0.22
 12 -5 1 6.99 0.22
 -12 5 1 6.6 0.19
 12 5 -1 7.12 0.19
 12 5 -1 6.65 0.21
 -12 5 -2 0.74 0.05
 -12 -5 2 0.66 0.05
 12 -5 -2 0.57 0.05
 12 -5 -2 0.72 0.05
 -12 -5 2 0.66 0.04
 -12 5 2 0.71 0.04
 12 5 -2 0.7 0.04
 -12 -5 -2 0.67 0.04
 12 -5 2 0.68 0.05
 12 5 -2 0.68 0.04
 12 -5 2 0.69 0.05
 12 -5 -3 0.8 0.06
 -12 -5 3 0.73 0.06
 -12 -5 3 0.68 0.05
 12 -5 -3 0.71 0.06
 -12 5 -3 0.82 0.06
 -12 5 3 0.71 0.04
 12 -5 3 0.69 0.05
 -12 -5 -3 0.81 0.05
 12 -5 3 0.76 0.05
 -12 -5 4 0.46 0.05
 12 -5 -4 0.51 0.05
 -12 5 -4 0.52 0.05
 12 -5 -4 0.53 0.05
 -12 -5 4 0.54 0.05
 -12 5 4 0.54 0.04
 12 -5 4 0.59 0.06
 12 -5 4 0.47 0.05
 -12 -5 -4 0.52 0.05
 12 -5 -5 4.51 0.17
 -12 -5 5 4.38 0.17
 -12 -5 5 4.13 0.17
 -12 5 -5 4.18 0.16
 12 -5 -5 4.28 0.17
 -12 -5 -5 4.44 0.16
 12 -5 5 4.23 0.17
 12 -5 5 4.14 0.15
 -12 5 5 3.98 0.16
 12 -5 -6 3.57 0.15
 -12 -5 6 3.8 0.16
 -12 5 -6 3.6 0.15
 12 -5 -6 3.52 0.16
 -12 -5 6 3.63 0.15
 -12 -5 -6 3.54 0.15
 12 -5 6 3.55 0.16
 -12 5 6 3.49 0.15
 -12 5 -7 2.69 0.13
 12 -5 -7 2.69 0.14
 -12 -5 7 2.59 0.13
 -12 -5 7 2.94 0.14
 -12 5 7 2.52 0.12
 -12 -5 -7 2.78 0.13
 12 -5 7 2.93 0.14
 -12 5 7 2.56 0.13
 -12 -5 8 1.59 0.11
 -12 -5 8 1.53 0.11
 -12 5 -8 1.58 0.11
 12 -5 8 1.77 0.11
 -12 -5 -8 1.57 0.11
 -12 5 8 1.65 0.11
 12 6 0 5.15 0.15
 12 -6 0 4.88 0.18
 -12 6 0 5.13 0.16
 -12 -6 0 5.08 0.17
 12 -6 0 4.98 0.18
 12 -6 -1 6.45 0.22
 -12 6 -1 6.84 0.2
 -12 -6 1 6.46 0.21
 -12 -6 1 6.32 0.2
 12 -6 -1 6.44 0.22
 -12 6 1 6.22 0.19
 -12 -6 -1 6.82 0.2
 12 6 -1 6.91 0.19
 12 -6 1 6.5 0.22
 12 -6 1 6.44 0.22
 -12 -6 -1 6.89 0.2
 12 -6 -2 3.3 0.13
 -12 -6 2 3.66 0.12
 -12 6 -2 3.37 0.12
 12 -6 -2 3.07 0.13
 -12 -6 2 3.12 0.13
 12 6 -2 3.53 0.11
 -12 -6 -2 3.34 0.12
 12 -6 2 3.36 0.13
 -12 6 2 3.25 0.11
 12 -6 2 3.22 0.13
 12 -6 -3 8.72 0.29
 12 -6 -3 8.53 0.29
 -12 -6 3 9.25 0.27
 -12 6 -3 9.02 0.27
 -12 -6 3 8.46 0.28
 -12 6 3 8.97 0.25
 12 -6 3 8.18 0.28
 -12 -6 -3 8.57 0.26
 12 -6 3 9.15 0.28
 -12 -6 4 0.8 0.06
 12 -6 -4 0.89 0.07
 -12 -6 4 0.85 0.06
 12 -6 -4 0.77 0.06
 -12 6 -4 0.77 0.06
 -12 -6 -4 0.8 0.06
 12 -6 4 0.86 0.07
 12 -6 4 0.74 0.06
 -12 6 4 0.75 0.05
 12 -6 -5 0.06 0.04
 -12 -6 5 0.02 0.02
 -12 -6 5 0.06 0.03
 12 -6 -5 0.01 0.01
 -12 6 -5 0.01 0.01
 12 -6 5 0.07 0.03
 -12 6 5 0.05 0.03
 12 -6 5 0.02 0.01
 -12 -6 -5 0.03 0.02
 -12 -6 6 0.16 0.05
 12 -6 -6 0.13 0.04
 12 -6 -6 0.24 0.05
 -12 6 -6 0.18 0.05
 -12 -6 6 0.18 0.05
 12 -6 6 0.16 0.04
 -12 -6 -6 0.12 0.05
 -12 6 6 0.25 0.05
 12 -6 6 0.22 0.05
 -12 6 -7 1.35 0.1
 12 -6 -7 1.37 0.09
 -12 -6 7 1.5 0.1
 -12 -6 7 1.43 0.1
 -12 6 7 1.16 0.08
 12 -6 7 1.44 0.1
 -12 -6 -7 1.44 0.1
 -12 6 7 1.3 0.09
 -12 6 -8 0.79 0.08
 -12 -6 8 0.82 0.08
 -12 -6 8 0.93 0.08
 -12 6 8 0.99 0.08
 -12 -6 -8 0.82 0.08
 12 -6 8 0.89 0.09
 12 -7 0 9.65 0.31
 -12 -7 0 9.96 0.29
 12 7 0 10.02 0.28
 -12 7 0 9.31 0.28
 12 -7 0 9.77 0.31
 12 7 1 13.86 0.38
 12 -7 -1 13.7 0.41
 12 -7 -1 12.95 0.41
 -12 7 -1 13.33 0.38
 -12 -7 1 13.94 0.4
 12 -7 1 13.53 0.41
 12 7 -1 14.12 0.37
 12 -7 1 12.8 0.41
 -12 7 1 13.71 0.38
 -12 -7 -1 13.36 0.38
 -12 -7 -1 14.1 0.39
 -12 7 -2 2.41 0.1
 12 -7 -2 2.47 0.12
 -12 -7 2 2.52 0.11
 12 -7 -2 2.36 0.11
 12 7 -2 2.68 0.09
 -12 -7 -2 2.36 0.1
 12 -7 2 2.51 0.11
 12 -7 2 2.53 0.11
 -12 7 2 2.46 0.1
 -12 7 -3 4.12 0.15
 -12 -7 3 3.71 0.15
 12 -7 -3 4.02 0.15
 12 -7 -3 4 0.16
 -12 -7 3 4.06 0.14
 -12 7 3 3.96 0.13
 -12 -7 -3 3.91 0.14
 12 -7 3 3.85 0.16
 12 -7 3 3.58 0.15
 -12 -7 4 3.39 0.15
 12 -7 -4 3.04 0.14
 -12 7 -4 3.47 0.14
 12 -7 -4 3.43 0.14
 -12 -7 4 3.38 0.13
 -12 -7 -4 3.57 0.14
 -12 7 4 3.11 0.12
 12 -7 4 3.16 0.14
 12 -7 4 3.24 0.14
 -12 -7 5 5.88 0.21
 -12 7 -5 6.12 0.22
 12 -7 -5 5.81 0.22
 -12 -7 5 6.13 0.23
 12 -7 -5 5.84 0.22
 -12 -7 -5 6.34 0.21
 12 -7 5 6.4 0.23
 12 -7 5 5.62 0.21
 -12 7 -6 0.19 0.05
 12 -7 -6 0.18 0.05
 -12 -7 6 0.22 0.05
 -12 -7 6 0.2 0.06
 12 -7 -6 0.17 0.05
 -12 -7 -6 0.16 0.05
 -12 7 6 0.13 0.04
 12 -7 6 0.16 0.05
 12 -7 6 0.23 0.04
 -12 -7 7 2.24 0.13
 -12 7 -7 2.22 0.12
 -12 -7 7 2.25 0.12
 12 -7 -7 2.1 0.12
 12 -7 7 2.35 0.13
 -12 7 7 2.21 0.12
 -12 -7 -7 2.27 0.12
 -12 7 -8 0.03 0.02
 -12 -7 8 0.1 0.06
 -12 -7 8 0.06 0.03
 12 -7 8 0.22 0.06
 -12 -7 -8 0.13 0.06
 12 8 0 0.2 0.03
 12 -8 0 0.24 0.04
 -12 -8 0 0.23 0.04
 -12 8 0 0.24 0.04
 12 -8 0 0.3 0.04
 -12 8 -1 4.27 0.15
 12 -8 -1 4.52 0.16
 -12 -8 1 4.13 0.16
 12 8 1 4.38 0.15
 12 -8 -1 4.21 0.17
 -12 -8 -1 4.3 0.15
 -12 8 1 4.43 0.15
 12 -8 1 4.32 0.16
 12 -8 1 4.29 0.17
 12 8 -1 4.61 0.15
 -12 -8 2 0.88 0.07
 12 -8 -2 0.94 0.07
 12 -8 -2 0.92 0.07
 -12 8 -2 0.92 0.06
 12 -8 2 0.98 0.07
 12 8 -2 1.03 0.06
 -12 8 2 1.01 0.06
 12 -8 2 1.05 0.07
 -12 -8 -2 0.96 0.06
 -12 -8 3 6.62 0.23
 -12 8 -3 6.87 0.22
 12 -8 -3 6.4 0.23
 12 -8 -3 6.74 0.24
 12 -8 3 6.55 0.23
 12 -8 3 6.61 0.23
 -12 8 3 6.38 0.21
 -12 -8 -3 6.75 0.22
 12 -8 -4 0.6 0.06
 -12 -8 4 0.68 0.07
 -12 8 -4 0.65 0.06
 12 -8 -4 0.59 0.06
 12 -8 4 0.63 0.06
 12 -8 4 0.59 0.06
 -12 8 4 0.59 0.05
 -12 -8 -4 0.59 0.06
 12 -8 -5 3.95 0.17
 -12 8 -5 4.13 0.17
 12 -8 -5 3.82 0.16
 -12 -8 5 3.78 0.16
 -12 -8 5 4.28 0.18
 -12 -8 -5 4.09 0.16
 12 -8 5 4.15 0.17
 12 -8 5 3.96 0.16
 -12 -8 6 1.31 0.09
 -12 -8 6 1.45 0.1
 12 -8 -6 1.34 0.09
 -12 8 -6 1.53 0.1
 12 -8 -6 1.36 0.09
 12 -8 6 1.42 0.09
 -12 -8 -6 1.52 0.1
 -12 8 6 1.38 0.09
 12 -8 6 1.46 0.1
 -12 8 -7 0.64 0.07
 -12 -8 7 0.57 0.08
 -12 -8 7 0.47 0.07
 -12 -8 -7 0.58 0.07
 12 -8 7 0.61 0.08
 12 -9 0 0 0.01
 -12 9 0 0.02 0.01
 -12 -9 0 0.02 0.01
 12 -9 0 -0.01 0.01
 12 9 0 0.01 0.01
 -12 -9 1 4.5 0.17
 12 9 1 4.64 0.16
 -12 9 -1 4.56 0.17
 12 -9 -1 4.75 0.17
 12 -9 -1 4.54 0.18
 -12 9 1 4.77 0.17
 12 -9 1 4.85 0.19
 12 -9 1 5.08 0.18
 12 9 -1 4.59 0.16
 12 -9 -2 0.43 0.05
 -12 9 -2 0.43 0.05
 12 -9 -2 0.42 0.05
 12 9 2 0.34 0.05
 -12 -9 2 0.46 0.05
 -12 -9 -2 0.46 0.05
 12 -9 2 0.36 0.05
 12 -9 2 0.39 0.05
 -12 9 2 0.4 0.04
 -12 9 -3 1.59 0.09
 12 -9 -3 1.37 0.08
 12 -9 -3 1.4 0.09
 -12 -9 3 1.41 0.09
 -12 -9 -3 1.45 0.08
 12 -9 3 1.5 0.09
 12 -9 3 1.53 0.09
 -12 9 3 1.41 0.08
 -12 9 -4 0.29 0.05
 12 -9 -4 0.21 0.04
 12 -9 -4 0.19 0.05
 -12 -9 4 0.19 0.05
 -12 -9 -4 0.2 0.05
 -12 9 4 0.14 0.04
 12 -9 4 0.19 0.05
 12 -9 4 0.21 0.05
 -12 -9 5 1.42 0.1
 -12 9 -5 1.72 0.1
 12 -9 -5 1.54 0.1
 12 -9 5 1.51 0.1
 12 -9 5 1.49 0.1
 -12 -9 -5 1.63 0.1
 -12 9 -6 2.6 0.14
 -12 -9 6 2.51 0.14
 12 -9 6 2.7 0.14
 -12 -9 -6 2.96 0.14
 12 -9 6 2.82 0.14
 -12 9 -7 1.02 0.09
 -12 -9 7 0.93 0.09
 12 -9 7 1.12 0.09
 -12 -9 -7 1.1 0.09
 -12 -10 0 0.36 0.04
 12 10 0 0.34 0.05
 12 -10 0 0.4 0.06
 12 -10 0 0.37 0.05
 -12 10 0 0.34 0.05
 12 -10 -1 4.31 0.17
 12 10 1 3.85 0.15
 -12 10 -1 3.75 0.15
 12 -10 -1 3.9 0.15
 -12 -10 1 4.06 0.16
 12 -10 1 4.02 0.17
 -12 10 1 3.97 0.15
 12 10 -1 4.06 0.15
 12 -10 1 3.81 0.15
 12 10 2 1.01 0.07
 12 -10 -2 0.99 0.07
 12 -10 -2 0.85 0.07
 -12 10 -2 0.9 0.07
 -12 -10 2 1.02 0.07
 12 -10 2 1.01 0.08
 -12 10 2 1.09 0.07
 12 -10 2 0.92 0.07
 12 10 3 1.6 0.09
 -12 -10 3 1.94 0.11
 -12 10 -3 1.84 0.1
 12 -10 -3 1.86 0.11
 12 -10 3 1.69 0.1
 12 -10 3 1.83 0.1
 -12 10 3 1.73 0.09
 -12 -10 -3 1.82 0.1
 12 -10 -4 1.51 0.1
 -12 10 -4 1.37 0.09
 -12 -10 4 1.44 0.1
 -12 -10 -4 1.65 0.1
 12 -10 4 1.4 0.09
 12 -10 4 1.7 0.1
 -12 10 4 1.52 0.08
 -12 10 -5 4.14 0.18
 12 -10 -5 3.99 0.17
 -12 -10 5 4.32 0.19
 12 -10 5 4.1 0.18
 -12 -10 -5 4.48 0.18
 12 -10 5 3.94 0.18
 -12 10 -6 0.71 0.08
 -12 -10 6 0.56 0.07
 -12 -10 -6 0.79 0.08
 12 -10 6 0.71 0.07
 12 -10 6 0.65 0.07
 -12 11 0 5.63 0.2
 12 -11 0 5.59 0.22
 12 11 0 5.24 0.19
 12 -11 0 5.4 0.2
 -12 11 -1 9.57 0.3
 12 -11 -1 9.08 0.31
 -12 -11 1 8.81 0.3
 12 11 1 9.2 0.29
 12 -11 1 8.68 0.3
 12 -11 1 9.9 0.32
 12 11 -1 8.63 0.28
 -12 11 1 9.03 0.29
 -12 -11 2 3.11 0.14
 12 -11 -2 3.24 0.15
 -12 11 -2 3.39 0.15
 12 11 2 3.26 0.14
 12 -11 2 3.69 0.16
 -12 11 2 3.34 0.14
 12 -11 2 3.11 0.14
 12 11 3 4.35 0.17
 12 -11 -3 4.21 0.18
 -12 -11 3 4.3 0.18
 -12 11 -3 4.24 0.17
 -12 -11 -3 4.12 0.17
 12 -11 3 3.97 0.17
 -12 11 3 4.12 0.16
 12 -11 3 4.42 0.18
 -12 11 -4 0.15 0.06
 12 11 4 0.14 0.05
 12 -11 -4 0.18 0.05
 -12 -11 4 0.21 0.06
 -12 -11 -4 0.08 0.05
 12 -11 4 0.17 0.05
 12 -11 4 0.13 0.05
 -12 11 4 0.17 0.05
 -12 11 -5 3.38 0.15
 -12 -11 5 2.96 0.15
 -12 -11 -5 3.14 0.15
 12 -11 5 3.23 0.15
 12 -11 5 3.15 0.15
 12 -12 0 0.54 0.07
 12 12 0 0.58 0.06
 -12 12 0 0.59 0.07
 -12 12 -1 3.2 0.14
 -12 -12 1 3.14 0.14
 12 12 1 3.14 0.14
 12 -12 -1 3.32 0.15
 12 -12 1 3.31 0.16
 -12 12 1 3.29 0.14
 12 12 -1 3.23 0.14
 12 -12 -2 0.23 0.05
 -12 -12 2 0.23 0.05
 -12 12 -2 0.19 0.06
 12 12 2 0.28 0.05
 12 -12 2 0.23 0.05
 -12 12 2 0.27 0.05
 -12 12 -3 4.69 0.19
 12 -12 -3 4.36 0.19
 12 12 3 4.64 0.18
 -12 -12 3 4.37 0.19
 -12 12 3 4.44 0.17
 12 -12 3 4.21 0.18
 12 -12 3 4.93 0.2
 -12 -12 4 0.25 0.06
 12 -12 -4 0.21 0.06
 -12 12 -4 0.16 0.06
 12 12 4 0.24 0.06
 -12 12 4 0.26 0.05
 -12 -12 -4 0.23 0.06
 12 -12 4 0.25 0.06
 12 -12 4 0.22 0.05
 12 13 0 0.29 0.06
 -12 13 0 0.25 0.06
 12 -13 0 0.28 0.06
 -12 13 -1 0.11 0.05
 12 -13 -1 0.09 0.05
 12 13 1 0.1 0.05
 -12 13 1 0.11 0.05
 12 -13 1 0.11 0.05
 12 13 2 0.51 0.07
 12 -13 -2 0.61 0.07
 -12 -13 2 0.61 0.07
 -12 13 -2 0.63 0.08
 -12 13 2 0.62 0.07
 12 -13 2 0.51 0.07
 -12 13 -3 0.59 0.07
 12 13 3 0.59 0.07
 -12 -13 3 0.55 0.07
 12 -13 -3 0.47 0.07
 -12 13 3 0.52 0.07
 12 -13 3 0.55 0.07
 12 14 0 0.81 0.07
 -12 14 0 0.85 0.08
 12 -14 0 0.77 0.09
 -13 0 0 0.05 0.02
 13 0 0 0.04 0.02
 13 0 0 0.04 0.02
 13 0 -1 0 0.01
 13 0 1 0.02 0.02
 13 0 -1 -0.01 0.01
 -13 0 -1 0.05 0.01
 -13 0 1 0 0.01
 13 0 1 0 0.01
 13 0 2 0.06 0.02
 13 0 -2 0 0.01
 13 0 2 0.01 0.01
 -13 0 2 0.01 0.01
 13 0 -2 0 0.01
 -13 0 -2 0.04 0.02
 13 0 3 0 0.01
 13 0 -3 0.05 0.03
 -13 0 -3 0 0.01
 13 0 3 0.01 0.01
 -13 0 3 0.01 0.01
 -13 0 -4 0.07 0.03
 -13 0 4 0 0.01
 13 0 -4 0.06 0.04
 13 0 5 0 0.01
 -13 0 5 0.01 0.02
 13 0 -5 0.01 0.01
 -13 0 -5 -0.01 0.01
 -13 0 6 0.01 0.01
 -13 0 -6 -0.02 0.01
 13 0 6 0 0.01
 -13 0 6 0.01 0.02
 13 0 -6 0.01 0.02
 -13 0 -7 0.14 0.05
 -13 0 7 0.09 0.05
 -13 0 8 0.13 0.06
 -13 0 8 0.1 0.05
 13 0 9 0.01 0.02
 -13 0 9 0.01 0.02
 -13 0 -9 -0.02 0.02
 -13 0 9 0.01 0.02
 13 -1 0 1.24 0.06
 -13 -1 0 1.12 0.04
 13 1 0 1.12 0.06
 -13 1 0 1.18 0.04
 -13 -1 0 1.11 0.06
 13 1 0 1.12 0.06
 13 -1 0 1.09 0.06
 -13 -1 1 5.44 0.18
 13 -1 -1 5.72 0.19
 13 1 1 5.63 0.18
 -13 1 -1 5.69 0.16
 13 1 1 5.59 0.17
 13 -1 -1 5.64 0.19
 13 -1 1 5.66 0.18
 13 1 -1 5.59 0.18
 13 1 -1 5.56 0.18
 -13 1 1 5.24 0.14
 13 -1 1 5.67 0.18
 -13 -1 -1 5.89 0.16
 -13 -1 -1 5.74 0.17
 13 -1 -2 3.55 0.14
 -13 -1 2 3.75 0.14
 13 -1 -2 3.83 0.14
 13 1 2 3.82 0.12
 13 1 2 3.92 0.13
 -13 1 -2 3.9 0.12
 -13 -1 -2 3.73 0.12
 13 -1 2 3.7 0.13
 13 1 -2 3.94 0.14
 13 -1 2 3.98 0.13
 -13 -1 -2 3.8 0.12
 -13 1 -3 6.13 0.19
 13 1 3 6.32 0.18
 -13 -1 3 6.09 0.21
 13 -1 -3 6.14 0.21
 13 -1 -3 5.78 0.21
 13 1 3 6.09 0.2
 13 -1 3 6.17 0.2
 -13 -1 -3 6.28 0.19
 13 -1 3 6.58 0.19
 13 1 -3 6.05 0.21
 -13 1 3 6.42 0.21
 13 1 4 1.45 0.07
 -13 -1 4 1.4 0.08
 -13 1 -4 1.67 0.08
 13 -1 -4 1.48 0.08
 -13 1 4 1.43 0.08
 13 -1 4 1.53 0.08
 13 1 -4 1.55 0.09
 -13 -1 -4 1.54 0.08
 13 -1 -5 0.23 0.05
 13 1 5 0.27 0.04
 -13 1 -5 0.22 0.04
 -13 -1 5 0.23 0.05
 -13 -1 5 0.23 0.04
 -13 1 5 0.22 0.04
 13 1 -5 0.21 0.04
 13 -1 5 0.17 0.04
 -13 -1 -5 0.17 0.04
 -13 -1 6 9.01 0.3
 -13 1 -6 8.98 0.28
 13 1 6 8.52 0.28
 13 -1 -6 8.27 0.3
 -13 -1 6 8.85 0.3
 13 -1 6 8.69 0.29
 -13 1 6 8.89 0.3
 -13 -1 -6 9.4 0.28
 -13 1 6 8.62 0.29
 -13 1 -7 1.53 0.1
 -13 -1 7 1.46 0.09
 -13 -1 7 1.34 0.09
 13 1 7 1.33 0.08
 13 -1 7 1.45 0.09
 -13 1 7 1.38 0.09
 -13 -1 -7 1.39 0.09
 -13 1 7 1.43 0.1
 -13 -1 8 3.68 0.16
 -13 -1 8 3.8 0.17
 -13 1 -8 3.71 0.16
 13 1 8 3.38 0.15
 -13 1 8 3.81 0.17
 -13 1 8 3.74 0.16
 13 -1 8 3.77 0.17
 -13 -1 -8 3.56 0.16
 -13 -1 9 0.38 0.07
 -13 1 -9 0.48 0.07
 -13 -1 9 0.39 0.06
 13 -1 9 0.39 0.06
 -13 1 9 0.41 0.07
 -13 -1 -9 0.44 0.07
 13 -2 0 4.7 0.16
 -13 2 0 4.93 0.14
 -13 -2 0 4.57 0.13
 -13 -2 0 5 0.16
 13 -2 0 4.56 0.16
 13 2 0 5.21 0.16
 13 2 1 0.7 0.04
 13 -2 -1 0.7 0.05
 -13 2 -1 0.74 0.04
 -13 -2 1 0.81 0.05
 -13 -2 -1 0.72 0.04
 13 -2 1 0.87 0.05
 13 -2 1 0.71 0.05
 -13 -2 -1 0.79 0.04
 13 2 -1 0.77 0.05
 -13 2 1 0.83 0.03
 -13 -2 2 13.79 0.43
 13 2 2 14.42 0.42
 -13 2 -2 14.77 0.39
 13 -2 -2 14.53 0.43
 13 -2 -2 15.03 0.44
 -13 -2 -2 14.58 0.39
 13 -2 2 14.63 0.42
 -13 -2 -2 14.86 0.4
 13 2 -2 15.67 0.43
 13 -2 2 13.85 0.43
 -13 2 -3 13.43 0.37
 13 2 3 13.07 0.38
 13 -2 -3 12.19 0.39
 13 -2 -3 13.22 0.4
 -13 -2 3 13.19 0.39
 13 2 -3 13.27 0.4
 13 -2 3 12.99 0.4
 -13 2 3 13.12 0.39
 -13 -2 -3 13.48 0.36
 13 -2 3 13.27 0.38
 -13 -2 4 10.83 0.34
 13 -2 -4 10.79 0.34
 -13 2 -4 10.66 0.32
 13 2 4 11.04 0.33
 13 -2 -4 10.75 0.35
 -13 2 4 10.99 0.34
 13 -2 4 10.86 0.34
 13 -2 4 11.55 0.32
 13 2 -4 10.69 0.34
 -13 -2 -4 10.98 0.32
 13 2 5 1.65 0.08
 13 -2 -5 1.57 0.09
 -13 -2 5 1.56 0.09
 -13 -2 5 1.7 0.09
 -13 2 -5 1.59 0.09
 13 -2 5 1.7 0.09
 -13 2 5 1.83 0.09
 13 2 -5 1.43 0.09
 -13 -2 -5 1.49 0.08
 -13 2 -6 7.92 0.26
 13 -2 -6 7.32 0.27
 13 2 6 7.7 0.26
 -13 -2 6 8.19 0.27
 -13 -2 6 7.72 0.27
 -13 2 6 7.83 0.27
 -13 -2 -6 7.85 0.26
 13 -2 6 7.71 0.27
 -13 2 6 8.2 0.27
 -13 -2 7 0.81 0.07
 13 2 7 0.76 0.06
 -13 -2 7 0.8 0.08
 -13 2 -7 1.05 0.08
 -13 2 7 0.95 0.08
 -13 2 7 0.8 0.07
 -13 -2 -7 0.95 0.08
 13 -2 7 0.89 0.08
 -13 -2 8 1.5 0.1
 -13 2 -8 1.48 0.1
 -13 -2 8 1.4 0.1
 -13 -2 -8 1.22 0.09
 13 -2 8 1.35 0.1
 -13 2 8 1.35 0.1
 -13 2 8 1.27 0.09
 -13 -2 9 1.17 0.1
 -13 2 -9 1.26 0.1
 -13 -2 9 1.25 0.09
 13 -2 9 1.32 0.1
 -13 2 9 1.26 0.1
 -13 -2 -9 1.29 0.1
 -13 -3 0 0.05 0.02
 -13 3 0 0.03 0.02
 -13 -3 0 0.04 0.01
 13 3 0 0.07 0.02
 13 -3 0 0.06 0.02
 13 -3 0 0.05 0.02
 -13 -3 1 17.13 0.49
 13 -3 -1 16.86 0.5
 -13 3 -1 17.56 0.46
 13 3 1 17.04 0.49
 13 -3 -1 16.3 0.5
 13 3 -1 17.73 0.44
 -13 -3 -1 17.94 0.45
 13 -3 1 16.74 0.5
 13 3 -1 17.78 0.5
 -13 -3 -1 18.19 0.48
 -13 3 1 17.4 0.45
 13 -3 1 16.94 0.49
 13 3 2 3.77 0.12
 13 -3 -2 3.66 0.14
 -13 -3 2 3.64 0.14
 13 -3 -2 3.52 0.14
 -13 3 -2 3.7 0.12
 -13 -3 -2 3.73 0.11
 13 3 -2 3.73 0.13
 -13 -3 -2 3.7 0.12
 -13 3 2 3.61 0.11
 13 -3 2 3.51 0.14
 13 -3 2 3.64 0.13
 13 -3 -3 4.04 0.16
 13 -3 -3 4.78 0.17
 -13 -3 3 4.28 0.16
 -13 3 -3 4.62 0.15
 13 3 3 4.45 0.14
 13 -3 3 4.25 0.15
 13 -3 3 4.45 0.16
 13 3 -3 4.61 0.16
 -13 -3 -3 4.65 0.15
 13 -3 -4 4.8 0.19
 -13 -3 4 5.14 0.18
 13 3 4 5.19 0.17
 -13 -3 4 4.98 0.19
 13 -3 -4 5.1 0.19
 -13 3 -4 5.06 0.17
 -13 3 4 5.01 0.18
 13 -3 4 5.35 0.17
 13 -3 4 5.33 0.19
 13 3 -4 5.41 0.19
 -13 -3 -4 5.44 0.17
 -13 3 -5 1.6 0.09
 13 -3 -5 1.42 0.09
 -13 -3 5 1.59 0.09
 13 -3 -5 1.39 0.09
 -13 -3 5 1.54 0.09
 13 3 5 1.43 0.07
 -13 3 5 1.51 0.09
 13 -3 5 1.69 0.09
 -13 -3 -5 1.5 0.08
 -13 -3 6 2.68 0.13
 -13 -3 6 2.72 0.13
 13 -3 -6 2.68 0.13
 -13 3 -6 2.59 0.12
 -13 -3 -6 2.76 0.13
 -13 3 6 2.77 0.13
 13 -3 6 2.89 0.13
 -13 -3 7 2.08 0.12
 -13 -3 7 2.06 0.12
 -13 3 -7 2.27 0.12
 -13 3 7 2.18 0.12
 -13 3 7 2.11 0.11
 13 -3 7 2.04 0.12
 -13 -3 -7 2.4 0.12
 -13 -3 8 5.85 0.23
 -13 3 -8 5.65 0.22
 -13 -3 8 5.95 0.23
 -13 -3 -8 5.94 0.22
 -13 3 8 5.88 0.23
 13 -3 8 5.74 0.23
 -13 3 8 5.53 0.22
 -13 3 -9 2.3 0.13
 -13 -3 9 2.17 0.13
 -13 -3 9 2.08 0.13
 13 -3 9 2.37 0.13
 -13 3 9 2.29 0.13
 -13 -3 -9 2.34 0.13
 13 4 0 12.8 0.37
 13 -4 0 12.3 0.38
 -13 -4 0 13.11 0.37
 -13 4 0 13.04 0.34
 -13 -4 0 12.73 0.34
 13 -4 0 12.75 0.38
 13 -4 -1 8.21 0.27
 -13 -4 1 8.56 0.27
 -13 4 -1 9 0.25
 13 4 1 8.73 0.26
 13 -4 -1 9.13 0.28
 13 -4 1 8.8 0.28
 -13 -4 -1 8.6 0.24
 13 4 -1 8.91 0.23
 -13 -4 -1 8.92 0.26
 13 -4 1 8.64 0.27
 13 4 -1 8.6 0.26
 -13 4 1 8.72 0.24
 -13 -4 2 18.92 0.56
 13 -4 -2 20.07 0.58
 13 -4 -2 19.56 0.57
 13 4 2 19.84 0.55
 -13 4 -2 20.01 0.53
 13 -4 2 19.32 0.56
 13 -4 2 19.69 0.57
 -13 4 2 19.55 0.51
 13 4 -2 19.8 0.56
 -13 -4 -2 19.65 0.52
 -13 -4 3 5.92 0.21
 -13 -4 3 6.1 0.2
 13 -4 -3 6.01 0.21
 13 -4 -3 5.7 0.21
 -13 4 -3 6 0.19
 13 4 3 6.14 0.18
 13 -4 3 5.92 0.2
 13 -4 3 5.87 0.21
 13 4 -3 5.98 0.2
 -13 -4 -3 6.12 0.19
 13 -4 -4 20.77 0.62
 -13 4 -4 21.3 0.58
 13 -4 -4 20.94 0.61
 -13 -4 4 20.79 0.61
 -13 -4 4 20.86 0.61
 -13 4 4 21.19 0.61
 -13 -4 -4 21.18 0.57
 13 -4 4 20.57 0.62
 13 -4 4 21.39 0.6
 13 -4 -5 4.4 0.18
 -13 4 -5 4.6 0.17
 13 -4 -5 4.74 0.18
 -13 -4 5 4.33 0.17
 -13 -4 5 4.59 0.18
 -13 -4 -5 4.84 0.17
 -13 4 5 4.55 0.18
 13 -4 5 4.72 0.16
 13 -4 5 4.89 0.18
 13 -4 -6 9.58 0.33
 -13 4 -6 10.3 0.32
 -13 -4 6 10.6 0.34
 -13 -4 6 9.94 0.33
 -13 -4 -6 9.97 0.31
 13 -4 6 10 0.34
 -13 4 6 9.89 0.33
 -13 -4 7 0.73 0.08
 -13 4 -7 0.66 0.07
 -13 -4 7 0.63 0.07
 13 -4 -7 0.59 0.07
 -13 4 7 0.64 0.06
 -13 -4 -7 0.63 0.07
 -13 4 7 0.76 0.07
 13 -4 7 0.75 0.08
 -13 4 -8 2.86 0.14
 -13 -4 8 2.78 0.14
 -13 -4 8 2.67 0.14
 -13 -4 -8 2.67 0.14
 13 -4 8 2.73 0.14
 -13 4 8 2.9 0.14
 13 5 0 0.37 0.03
 -13 -5 0 0.32 0.03
 -13 5 0 0.33 0.03
 13 -5 0 0.33 0.04
 -13 -5 0 0.41 0.03
 13 -5 0 0.46 0.04
 13 5 0 0.38 0.03
 13 -5 -1 6.72 0.23
 -13 -5 1 6.98 0.22
 -13 5 -1 6.74 0.2
 13 -5 -1 6.67 0.23
 -13 -5 -1 6.89 0.2
 -13 -5 -1 7.12 0.21
 13 5 -1 7.23 0.19
 13 5 -1 6.87 0.21
 -13 5 1 6.9 0.2
 13 -5 1 6.42 0.22
 13 -5 1 7.09 0.23
 -13 -5 2 6.31 0.2
 13 -5 -2 6.18 0.21
 -13 -5 2 6.11 0.21
 -13 5 -2 6.17 0.19
 13 -5 -2 6.14 0.21
 -13 -5 -2 6.2 0.19
 13 5 -2 6.35 0.2
 13 -5 2 6.11 0.21
 -13 5 2 6.23 0.18
 13 -5 2 5.86 0.21
 -13 -5 3 10.9 0.32
 13 -5 -3 10.38 0.34
 -13 5 -3 10.9 0.31
 -13 -5 3 10.06 0.33
 13 -5 -3 10.11 0.33
 -13 5 3 10.88 0.29
 -13 -5 -3 10.53 0.31
 13 -5 3 10.35 0.33
 13 -5 3 11.13 0.33
 -13 5 -4 3.81 0.14
 -13 -5 4 3.69 0.15
 13 -5 -4 3.48 0.15
 -13 -5 4 4.01 0.15
 13 -5 -4 3.67 0.15
 13 -5 4 3.68 0.15
 -13 -5 -4 3.53 0.14
 13 -5 4 3.81 0.14
 13 -5 -5 3.59 0.15
 13 -5 -5 3.55 0.15
 -13 -5 5 3.52 0.15
 -13 5 -5 3.5 0.14
 -13 -5 5 3.68 0.15
 13 -5 5 3.56 0.15
 13 -5 5 3.6 0.14
 -13 -5 -5 3.55 0.14
 -13 5 5 3.6 0.15
 -13 -5 6 2.5 0.13
 13 -5 -6 2.46 0.12
 -13 -5 6 2.43 0.12
 -13 5 -6 2.49 0.12
 13 -5 -6 2.46 0.13
 -13 5 6 2.41 0.12
 13 -5 6 2.39 0.13
 -13 -5 -6 2.6 0.12
 -13 -5 7 1.48 0.1
 -13 -5 7 1.57 0.11
 -13 5 -7 1.67 0.1
 13 -5 -7 1.72 0.11
 13 -5 7 1.75 0.11
 -13 -5 -7 1.59 0.1
 -13 5 7 1.64 0.1
 -13 5 7 1.62 0.1
 -13 5 -8 1.54 0.11
 -13 -5 8 1.84 0.11
 -13 -5 8 1.86 0.12
 -13 5 8 1.78 0.11
 -13 -5 -8 1.51 0.11
 13 -5 8 1.86 0.12
 -13 6 0 12.86 0.35
 13 6 0 13.2 0.35
 13 -6 0 12.46 0.39
 -13 -6 0 13 0.37
 13 -6 0 11.8 0.38
 -13 -6 1 5.82 0.19
 13 -6 -1 6.09 0.2
 -13 6 -1 5.84 0.18
 13 -6 -1 5.6 0.2
 -13 -6 -1 5.85 0.18
 -13 6 1 5.73 0.18
 -13 -6 -1 5.79 0.18
 13 6 -1 6.42 0.17
 13 -6 1 5.43 0.2
 13 -6 1 5.69 0.2
 13 6 -1 5.81 0.19
 -13 6 -2 9.43 0.28
 13 -6 -2 8.67 0.3
 -13 -6 2 10.12 0.28
 -13 -6 2 9.31 0.29
 13 -6 -2 9.16 0.3
 -13 6 2 9.54 0.26
 13 -6 2 9.23 0.3
 -13 -6 -2 9.4 0.27
 13 -6 2 9.06 0.29
 13 -6 -3 11.93 0.37
 -13 6 -3 11.83 0.35
 13 -6 -3 11.65 0.37
 -13 -6 3 12.11 0.36
 -13 -6 3 11.68 0.37
 -13 6 3 11.86 0.33
 13 -6 3 11.96 0.37
 13 -6 3 12.21 0.37
 -13 -6 -3 12.12 0.34
 13 -6 -4 0.48 0.05
 13 -6 -4 0.4 0.05
 -13 -6 4 0.4 0.05
 -13 6 -4 0.41 0.05
 -13 -6 4 0.33 0.05
 13 -6 4 0.37 0.04
 -13 -6 -4 0.44 0.05
 13 -6 4 0.31 0.05
 -13 -6 5 0.42 0.06
 13 -6 -5 0.53 0.06
 -13 6 -5 0.49 0.05
 13 -6 -5 0.39 0.05
 -13 -6 5 0.51 0.05
 -13 6 5 0.46 0.05
 -13 -6 -5 0.45 0.05
 13 -6 5 0.58 0.06
 13 -6 5 0.49 0.05
 13 -6 -6 5.73 0.22
 -13 -6 6 6.01 0.22
 13 -6 -6 5.74 0.22
 -13 6 -6 5.87 0.21
 -13 -6 6 6.23 0.23
 -13 6 6 5.67 0.21
 13 -6 6 6.3 0.23
 -13 -6 -6 5.95 0.21
 -13 -6 7 3.69 0.17
 13 -6 -7 3.81 0.17
 -13 6 -7 4 0.17
 -13 -6 7 3.91 0.17
 -13 -6 -7 4.11 0.17
 13 -6 7 3.76 0.17
 -13 6 7 3.43 0.16
 -13 6 7 3.54 0.16
 -13 -6 8 5.1 0.21
 -13 -6 8 5.13 0.21
 -13 6 -8 4.86 0.2
 -13 -6 -8 4.92 0.2
 -13 6 8 5 0.21
 13 -6 8 5.07 0.22
 13 7 0 0.77 0.05
 13 -7 0 0.75 0.06
 -13 -7 0 0.71 0.05
 13 -7 0 0.82 0.06
 -13 7 0 0.77 0.05
 13 -7 -1 0.45 0.05
 -13 -7 1 0.33 0.04
 -13 7 -1 0.45 0.04
 13 -7 -1 0.53 0.05
 13 7 1 0.42 0.04
 13 -7 1 0.36 0.05
 -13 7 1 0.32 0.04
 -13 -7 -1 0.35 0.04
 13 7 -1 0.53 0.04
 13 -7 1 0.37 0.04
 -13 7 -2 6.83 0.22
 13 -7 -2 7.11 0.24
 13 -7 -2 7.16 0.24
 -13 -7 2 7.11 0.24
 13 -7 2 7.15 0.24
 -13 7 2 7.12 0.21
 -13 -7 -2 7.1 0.22
 13 -7 2 6.73 0.24
 -13 7 -3 1.29 0.08
 13 -7 -3 1.15 0.08
 13 -7 -3 1.28 0.08
 -13 -7 3 1.29 0.08
 -13 -7 -3 1.31 0.07
 13 -7 3 1.31 0.08
 -13 7 3 1.34 0.06
 13 -7 3 1.18 0.08
 -13 7 -4 1.8 0.09
 13 -7 -4 1.61 0.1
 -13 -7 4 1.63 0.08
 -13 -7 4 1.55 0.09
 13 -7 -4 1.6 0.09
 13 -7 4 1.77 0.09
 13 -7 4 1.69 0.1
 -13 -7 -4 1.56 0.09
 13 -7 -5 2.95 0.14
 -13 7 -5 3.09 0.14
 13 -7 -5 2.73 0.13
 -13 -7 5 2.8 0.13
 -13 -7 5 2.96 0.14
 13 -7 5 3.02 0.14
 -13 -7 -5 2.84 0.13
 13 -7 5 2.85 0.13
 13 -7 -6 1.66 0.1
 -13 -7 6 1.59 0.1
 13 -7 -6 1.69 0.1
 -13 7 -6 1.75 0.11
 -13 -7 6 1.83 0.11
 -13 -7 -6 1.69 0.1
 13 -7 6 1.76 0.11
 -13 7 6 1.59 0.1
 13 -7 6 1.77 0.1
 -13 -7 7 5.75 0.22
 -13 -7 7 5.1 0.21
 13 -7 -7 5.11 0.21
 -13 7 -7 5.51 0.21
 13 -7 7 5.03 0.22
 -13 -7 -7 5.55 0.21
 -13 7 7 5.4 0.21
 -13 -8 0 8.06 0.25
 -13 8 0 7.91 0.25
 13 -8 0 7.98 0.27
 13 8 0 8.33 0.24
 13 -8 0 8.31 0.27
 -13 -8 1 19.55 0.56
 13 8 1 19.51 0.52
 13 -8 -1 19.79 0.57
 13 -8 -1 19.42 0.57
 -13 8 -1 18.71 0.53
 13 -8 1 19.06 0.57
 13 8 -1 19.16 0.52
 -13 -8 -1 18.1 0.52
 -13 8 1 18.58 0.52
 13 -8 1 19.97 0.57
 -13 8 -2 2.26 0.1
 13 -8 -2 2.25 0.11
 -13 -8 2 2.39 0.11
 13 -8 -2 2.14 0.1
 13 -8 2 2.31 0.11
 -13 8 2 2.11 0.09
 -13 -8 -2 2.2 0.1
 13 -8 2 2.26 0.11
 -13 8 -3 2.79 0.12
 -13 -8 3 2.75 0.13
 13 -8 -3 2.58 0.12
 13 -8 -3 2.62 0.13
 13 -8 3 2.73 0.13
 13 -8 3 2.83 0.13
 -13 -8 -3 2.53 0.11
 -13 8 3 2.81 0.11
 -13 8 -4 0.36 0.05
 13 -8 -4 0.4 0.05
 13 -8 -4 0.44 0.06
 -13 -8 4 0.34 0.05
 13 -8 4 0.32 0.05
 -13 -8 -4 0.44 0.05
 13 -8 4 0.43 0.06
 13 -8 -5 2.13 0.11
 -13 -8 5 1.96 0.12
 13 -8 -5 1.94 0.11
 -13 8 -5 2.21 0.11
 13 -8 5 1.92 0.11
 -13 -8 -5 1.99 0.11
 13 -8 5 1.95 0.11
 -13 -8 6 1.57 0.1
 -13 8 -6 1.8 0.11
 13 -8 -6 1.53 0.1
 13 -8 -6 1.57 0.1
 -13 -8 6 1.57 0.11
 -13 -8 -6 1.71 0.1
 13 -8 6 1.55 0.11
 13 -8 6 1.59 0.1
 -13 8 6 1.67 0.1
 -13 -8 7 0.18 0.05
 -13 8 -7 0.27 0.06
 -13 -8 7 0.24 0.06
 -13 -8 -7 0.27 0.06
 13 -8 7 0.24 0.06
 13 -9 0 0.79 0.06
 -13 9 0 0.84 0.06
 -13 -9 0 0.83 0.06
 13 -9 0 0.74 0.06
 13 9 0 0.76 0.05
 -13 -9 1 11.5 0.36
 13 -9 -1 11.54 0.37
 13 -9 -1 11.98 0.37
 13 9 1 11.62 0.34
 -13 9 -1 11.49 0.35
 13 -9 1 11.9 0.38
 13 -9 1 11.78 0.37
 -13 9 1 11.02 0.34
 13 9 -1 11.92 0.34
 -13 9 -2 1.88 0.1
 13 9 2 1.67 0.09
 -13 -9 2 1.77 0.1
 13 -9 -2 1.87 0.1
 13 -9 -2 1.69 0.09
 13 -9 2 1.73 0.09
 -13 -9 -2 1.88 0.09
 -13 9 2 1.7 0.09
 13 -9 2 1.85 0.1
 -13 9 -3 6.27 0.22
 -13 -9 3 6.37 0.23
 13 -9 -3 6.15 0.23
 13 -9 -3 5.93 0.22
 -13 -9 -3 5.91 0.21
 13 -9 3 6.33 0.23
 13 -9 3 6.38 0.23
 -13 9 3 6.25 0.2
 -13 9 -4 3.97 0.16
 13 -9 -4 3.6 0.16
 -13 -9 4 3.99 0.17
 13 -9 -4 3.84 0.17
 13 -9 4 4.02 0.17
 13 -9 4 4.16 0.17
 -13 -9 -4 3.96 0.16
 -13 -9 5 0.53 0.06
 13 -9 -5 0.38 0.06
 -13 9 -5 0.52 0.07
 13 -9 5 0.42 0.06
 13 -9 5 0.41 0.06
 -13 -9 -5 0.43 0.06
 -13 9 -6 2.06 0.12
 -13 -9 6 1.59 0.11
 13 -9 6 1.65 0.1
 -13 9 6 1.63 0.1
 -13 -9 -6 1.82 0.1
 13 -9 6 1.57 0.11
 -13 9 -7 3.66 0.17
 13 -9 7 3.92 0.18
 -13 -9 -7 3.85 0.17
 -13 10 0 0 0.01
 13 -10 0 0.01 0.01
 13 -10 0 0.02 0.02
 13 10 0 0 0.01
 13 -10 -1 3.93 0.16
 13 10 1 3.41 0.14
 -13 -10 1 3.34 0.14
 -13 10 -1 3.79 0.15
 13 -10 -1 3.6 0.15
 13 -10 1 3.76 0.16
 13 -10 1 3.48 0.15
 -13 10 1 3.4 0.14
 13 -10 -2 3.57 0.15
 13 -10 -2 3.74 0.16
 -13 -10 2 3.69 0.15
 13 10 2 3.53 0.14
 -13 10 -2 3.69 0.15
 13 -10 2 3.54 0.15
 13 -10 2 3.83 0.16
 -13 10 2 3.54 0.14
 -13 -10 3 4.58 0.18
 -13 10 -3 4.45 0.18
 13 -10 -3 4.91 0.19
 13 10 3 4.52 0.17
 13 -10 3 4.58 0.19
 13 -10 3 4.4 0.18
 -13 10 3 4.05 0.16
 -13 -10 -3 4.5 0.17
 -13 10 -4 4.18 0.17
 13 -10 -4 4 0.18
 -13 -10 4 4.37 0.18
 -13 -10 -4 4.35 0.17
 13 -10 4 4.33 0.18
 13 -10 4 4.23 0.18
 -13 -10 5 3.99 0.18
 13 -10 -5 3.8 0.17
 -13 10 -5 4.06 0.17
 -13 -10 -5 4.03 0.17
 13 -10 5 3.61 0.17
 13 -10 5 3.53 0.17
 -13 10 -6 0.11 0.06
 -13 -10 6 0.05 0.02
 -13 -10 -6 0.03 0.02
 13 -10 6 0.14 0.05
 13 -10 6 0.04 0.02
 13 -11 0 1.4 0.08
 -13 11 0 1.4 0.09
 13 -11 0 1.53 0.1
 13 11 0 1.4 0.08
 -13 -11 1 0.56 0.06
 13 11 1 0.59 0.06
 13 -11 -1 0.69 0.07
 -13 11 -1 0.66 0.07
 13 -11 1 0.6 0.06
 13 -11 1 0.63 0.07
 -13 11 1 0.58 0.06
 -13 11 -2 1.44 0.09
 13 -11 -2 1.46 0.1
 -13 -11 2 1.3 0.09
 13 11 2 1.4 0.09
 -13 11 2 1.23 0.08
 13 -11 2 1.22 0.08
 13 -11 2 1.42 0.1
 13 -11 -3 4.7 0.19
 13 11 3 4.43 0.17
 -13 -11 3 4.73 0.19
 -13 11 -3 4.93 0.19
 13 -11 3 4.49 0.19
 -13 11 3 4.31 0.17
 -13 -11 -3 4.39 0.17
 13 -11 3 4.12 0.18
 -13 11 -4 0.93 0.08
 -13 -11 4 1.07 0.09
 13 11 4 0.82 0.08
 13 -11 -4 1.01 0.09
 13 -11 4 0.99 0.09
 -13 -11 -4 0.95 0.08
 13 -11 4 0.97 0.08
 -13 -11 5 5.05 0.22
 -13 11 -5 5.38 0.22
 13 -11 5 5.66 0.22
 -13 -11 -5 5.61 0.21
 13 -11 5 5.57 0.22
 13 12 0 0.08 0.04
 -13 12 0 0.03 0.02
 13 -12 0 0.03 0.02
 13 12 1 0.76 0.07
 13 -12 -1 0.73 0.08
 -13 12 -1 0.66 0.07
 -13 12 1 0.87 0.07
 13 -12 1 0.8 0.08
 13 -12 -2 0.11 0.05
 -13 12 -2 0.24 0.06
 13 12 2 0.16 0.05
 -13 -12 2 0.17 0.05
 13 -12 2 0.19 0.05
 -13 12 2 0.11 0.05
 13 12 3 0.13 0.05
 -13 -12 3 0.19 0.05
 -13 12 -3 0.27 0.06
 13 -12 -3 0.17 0.06
 -13 12 3 0.23 0.05
 13 -12 3 0.21 0.06
 13 -12 3 0.22 0.05
 -13 12 -4 0.04 0.02
 -13 -12 4 0.02 0.02
 13 12 4 0 0.02
 13 -12 -4 0.03 0.02
 13 -12 4 0.09 0.05
 13 -12 4 0.08 0.05
 -13 -12 -4 0.11 0.05
 13 -13 0 0.18 0.06
 -13 13 0 0.16 0.05
 13 -13 -1 0.5 0.07
 13 13 1 0.67 0.07
 -13 13 -1 0.61 0.07
 13 -13 1 0.42 0.07
 -13 13 1 0.44 0.06
 -13 -13 2 0.95 0.08
 13 13 2 0.97 0.08
 13 -13 -2 1.19 0.09
 -13 13 -2 1.15 0.09
 -13 13 2 0.98 0.08
 13 -13 2 1.05 0.09
 13 -13 -3 1.3 0.1
 -13 -13 3 1.11 0.09
 -13 13 -3 1.42 0.1
 13 13 3 1.38 0.09
 -13 13 3 1.16 0.09
 -14 0 0 6.27 0.17
 14 0 0 6.51 0.2
 -14 0 0 6.14 0.2
 14 0 0 6.06 0.2
 14 0 -1 14.53 0.43
 14 0 -1 15.19 0.44
 -14 0 1 14.61 0.43
 14 0 1 14.77 0.42
 14 0 1 15.28 0.43
 -14 0 -1 14.4 0.39
 -14 0 -2 21.09 0.56
 -14 0 2 20.7 0.6
 14 0 -2 21.07 0.61
 14 0 2 21.88 0.59
 14 0 2 21.53 0.6
 14 0 -2 20.8 0.61
 -14 0 3 26.47 0.78
 14 0 -3 26.92 0.79
 14 0 3 28.44 0.76
 -14 0 -3 28.1 0.73
 14 0 3 28.57 0.78
 -14 0 -4 13.21 0.38
 14 0 4 13.54 0.4
 -14 0 4 13.31 0.41
 14 0 -4 13.06 0.41
 -14 0 5 23.85 0.69
 14 0 -5 23.25 0.7
 14 0 5 23.58 0.69
 -14 0 -5 24.35 0.65
 14 0 6 18.88 0.58
 -14 0 6 19.46 0.59
 -14 0 6 19.58 0.58
 -14 0 -6 18.73 0.54
 14 0 -6 20.06 0.59
 -14 0 -7 11.17 0.35
 -14 0 7 11.01 0.37
 14 0 7 10.67 0.35
 -14 0 7 11.12 0.36
 -14 0 8 12.6 0.41
 14 0 8 11.5 0.39
 -14 0 8 11.69 0.39
 -14 0 -8 12.38 0.38
 -14 0 9 2.87 0.14
 -14 0 -9 2.59 0.14
 -14 0 9 2.48 0.14
 14 0 9 2.69 0.14
 -14 1 0 16.22 0.43
 -14 -1 0 16.17 0.43
 14 -1 0 17.49 0.48
 14 -1 0 17.4 0.49
 -14 -1 0 16.31 0.47
 14 1 0 16.64 0.48
 14 1 0 16.85 0.48
 -14 1 -1 10.18 0.28
 14 -1 -1 10.21 0.31
 14 1 1 10.21 0.3
 14 1 1 10.42 0.31
 -14 -1 1 10.18 0.31
 14 -1 -1 10.44 0.31
 14 -1 1 10.12 0.31
 14 1 -1 10.02 0.31
 -14 -1 -1 10.09 0.3
 14 -1 1 9.93 0.3
 -14 -1 -1 10.4 0.27
 14 1 -1 10.38 0.31
 14 1 2 18.05 0.5
 -14 1 -2 17.04 0.46
 14 1 2 17.59 0.48
 14 -1 -2 16.73 0.5
 -14 -1 2 16.26 0.5
 14 -1 -2 16.78 0.51
 -14 -1 -2 17.18 0.46
 -14 1 2 17.18 0.5
 -14 -1 -2 17.86 0.48
 14 -1 2 17.44 0.5
 14 1 -2 16.92 0.5
 14 -1 2 17.6 0.49
 14 -1 -3 5.18 0.19
 -14 1 -3 5.44 0.17
 14 -1 -3 5.19 0.19
 -14 -1 3 5.26 0.19
 14 1 3 5.38 0.18
 -14 1 3 5.1 0.19
 14 1 -3 5.34 0.19
 14 -1 3 5.54 0.17
 -14 -1 -3 5.44 0.17
 14 -1 3 5.53 0.18
 14 -1 -4 3.92 0.16
 -14 1 -4 4.24 0.15
 14 1 4 4.02 0.15
 -14 -1 4 4.24 0.16
 14 -1 4 4.25 0.16
 -14 1 4 4.19 0.16
 -14 -1 -4 4.07 0.15
 14 1 -4 4.24 0.16
 -14 1 -5 1.29 0.08
 14 -1 -5 1.51 0.09
 14 1 5 1.45 0.08
 -14 -1 5 1.23 0.08
 -14 -1 -5 1.4 0.08
 14 -1 5 1.38 0.08
 -14 1 5 1.44 0.08
 14 1 -5 1.39 0.09
 -14 1 -6 10.06 0.32
 14 -1 -6 10.05 0.35
 14 1 6 10.39 0.33
 -14 -1 6 10.2 0.34
 -14 -1 6 10.6 0.34
 -14 -1 -6 10.5 0.32
 14 -1 6 10.32 0.34
 -14 1 6 10.71 0.35
 -14 1 6 10.51 0.34
 -14 -1 7 0.94 0.08
 -14 1 -7 0.92 0.08
 14 1 7 0.9 0.07
 -14 -1 7 0.83 0.08
 -14 1 7 1 0.08
 -14 1 7 0.97 0.08
 -14 -1 -7 0.88 0.08
 14 -1 7 0.92 0.07
 -14 -1 8 2.62 0.13
 -14 1 -8 2.61 0.14
 14 1 8 2.51 0.13
 -14 -1 8 2.65 0.14
 -14 1 8 2.51 0.13
 14 -1 8 2.5 0.13
 -14 -1 -8 2.61 0.14
 -14 1 8 2.66 0.14
 -14 1 -9 0.26 0.06
 -14 -1 9 0.43 0.07
 -14 -1 9 0.31 0.06
 -14 -1 -9 0.31 0.06
 -14 1 9 0.39 0.07
 -14 1 9 0.35 0.07
 14 -1 9 0.36 0.06
 14 -2 0 0.01 0.01
 14 -2 0 0.01 0.01
 14 2 0 0.03 0.02
 -14 2 0 0 0
 -14 -2 0 -0.01 0.01
 -14 2 -1 6.65 0.19
 14 -2 -1 6.62 0.22
 14 2 1 6.73 0.21
 14 -2 -1 6.68 0.22
 -14 2 1 6.68 0.18
 -14 -2 -1 6.5 0.19
 14 -2 1 6.59 0.21
 -14 -2 -1 6.99 0.2
 14 2 -1 6.93 0.21
 14 -2 1 6.45 0.22
 -14 2 -2 0.16 0.03
 -14 -2 2 0.22 0.03
 14 2 2 0.16 0.03
 14 -2 -2 0.16 0.04
 14 -2 -2 0.17 0.03
 -14 -2 -2 0.16 0.02
 14 -2 2 0.15 0.03
 14 2 -2 0.22 0.03
 14 -2 2 0.2 0.03
 -14 -2 -2 0.22 0.03
 14 -2 -3 1.7 0.09
 14 2 3 1.64 0.07
 -14 -2 3 1.72 0.09
 14 -2 -3 1.69 0.09
 -14 2 -3 1.64 0.08
 14 -2 3 1.83 0.09
 14 -2 3 1.69 0.07
 -14 -2 -3 1.73 0.08
 14 2 -3 1.73 0.09
 -14 2 3 1.72 0.09
 14 -2 -4 4.85 0.19
 14 -2 -4 5.39 0.2
 -14 2 -4 5.74 0.18
 14 2 4 5.69 0.18
 -14 -2 4 5.33 0.19
 14 -2 4 5.63 0.17
 14 -2 4 5.68 0.2
 -14 2 4 5.37 0.2
 -14 -2 -4 5.51 0.18
 14 2 -4 5.28 0.19
 14 2 5 5.67 0.19
 -14 2 -5 5.88 0.2
 -14 -2 5 5.49 0.21
 14 -2 -5 5.42 0.21
 -14 -2 5 5.68 0.21
 -14 -2 -5 5.88 0.2
 14 2 -5 5.71 0.21
 14 -2 5 5.61 0.21
 -14 2 5 5.91 0.21
 14 2 6 7.5 0.26
 -14 -2 6 7.6 0.27
 14 -2 -6 8.13 0.28
 -14 2 -6 7.85 0.26
 -14 -2 6 7.89 0.27
 -14 -2 -6 8.16 0.26
 -14 2 6 7.8 0.27
 14 -2 6 7.71 0.27
 -14 2 6 7.86 0.27
 -14 -2 7 8.41 0.3
 -14 -2 7 8.5 0.29
 -14 2 -7 8.42 0.28
 -14 2 7 7.94 0.28
 14 -2 7 8.38 0.29
 -14 2 7 8.47 0.3
 -14 -2 -7 8.4 0.28
 -14 -2 8 3.13 0.15
 -14 -2 8 2.86 0.15
 -14 2 -8 3.21 0.15
 -14 2 8 3.06 0.14
 -14 2 8 3 0.15
 -14 -2 -8 3.08 0.15
 14 -2 8 3 0.15
 -14 -3 0 0.21 0.03
 14 -3 0 0.24 0.03
 -14 3 0 0.19 0.02
 14 3 0 0.19 0.03
 -14 -3 0 0.14 0.02
 14 -3 0 0.17 0.03
 -14 3 -1 3.09 0.11
 14 3 1 3.33 0.11
 -14 -3 1 3.17 0.12
 14 -3 -1 3.19 0.13
 14 -3 -1 3.16 0.13
 -14 -3 -1 3.27 0.1
 14 -3 1 3.28 0.13
 14 3 -1 3.4 0.12
 -14 3 1 3.29 0.1
 14 -3 1 3.32 0.12
 -14 -3 -1 3.47 0.11
 -14 -3 2 1 0.06
 14 -3 -2 0.97 0.06
 14 -3 -2 0.95 0.06
 -14 3 -2 0.9 0.05
 14 3 2 1.08 0.05
 -14 -3 -2 0.96 0.04
 14 -3 2 1.06 0.06
 14 3 -2 0.92 0.06
 -14 -3 -2 0.97 0.05
 14 -3 2 1.01 0.06
 -14 -3 3 0.93 0.07
 14 -3 -3 1.08 0.07
 14 -3 -3 1 0.07
 -14 3 -3 1.1 0.06
 14 3 3 1.1 0.05
 14 -3 3 1.02 0.06
 14 -3 3 1.07 0.07
 -14 -3 -3 1.02 0.06
 -14 3 3 1.06 0.07
 14 3 -3 1 0.06
 14 -3 -4 2.84 0.13
 -14 -3 4 2.63 0.12
 14 3 4 2.63 0.1
 -14 3 -4 2.7 0.11
 -14 -3 4 2.8 0.12
 14 -3 -4 2.79 0.13
 -14 -3 -4 2.83 0.11
 -14 3 4 2.7 0.12
 14 -3 4 2.61 0.1
 14 3 -4 2.8 0.12
 14 -3 4 2.64 0.12
 -14 -3 5 1.11 0.08
 -14 -3 5 1.23 0.08
 -14 3 -5 1.16 0.08
 14 -3 -5 1.31 0.08
 14 -3 -5 1.11 0.08
 14 3 5 1.26 0.07
 14 -3 5 1.24 0.08
 -14 3 5 1.17 0.08
 -14 -3 -5 1.16 0.07
 -14 3 -6 12.66 0.38
 -14 -3 6 12.91 0.4
 -14 -3 6 12.71 0.41
 14 -3 -6 12.61 0.41
 -14 -3 -6 12.65 0.38
 -14 3 6 11.82 0.39
 14 -3 6 12.77 0.4
 14 -3 -7 1.77 0.11
 -14 -3 7 1.82 0.11
 -14 -3 7 2.03 0.12
 -14 3 -7 1.92 0.11
 14 -3 7 1.72 0.11
 -14 3 7 2.05 0.12
 -14 -3 -7 1.79 0.11
 -14 3 7 1.97 0.11
 -14 3 -8 4.91 0.2
 -14 -3 8 5.13 0.2
 -14 -3 8 4.71 0.21
 -14 3 8 4.8 0.19
 -14 -3 -8 4.6 0.19
 -14 3 8 5.07 0.21
 14 -3 8 4.69 0.2
 14 -4 0 1.88 0.09
 14 4 0 1.93 0.08
 -14 4 0 2.01 0.07
 -14 -4 0 1.91 0.08
 -14 -4 0 1.91 0.07
 -14 -4 1 6.75 0.22
 14 -4 -1 6.56 0.23
 14 4 1 6.83 0.21
 14 -4 -1 6.68 0.23
 -14 4 -1 6.76 0.2
 14 4 -1 6.93 0.21
 -14 4 1 6.92 0.19
 -14 -4 -1 6.91 0.19
 -14 -4 -1 7.21 0.21
 14 -4 1 6.28 0.22
 14 -4 1 6.92 0.23
 14 -4 -2 7.06 0.24
 14 -4 -2 6.78 0.23
 14 4 2 7.37 0.21
 -14 -4 2 6.6 0.23
 -14 4 -2 6.85 0.21
 14 4 -2 6.61 0.22
 -14 4 2 7.09 0.2
 -14 -4 -2 6.94 0.2
 14 -4 2 7.02 0.23
 14 -4 2 7 0.22
 14 -4 -3 3.91 0.16
 -14 4 -3 4.1 0.14
 14 -4 -3 4.03 0.16
 -14 -4 3 3.95 0.16
 14 -4 3 4.19 0.15
 14 -4 3 3.98 0.16
 -14 -4 -3 4.11 0.14
 14 4 -3 4.49 0.15
 -14 -4 4 7.64 0.25
 14 -4 -4 7.15 0.25
 -14 4 -4 7.4 0.23
 14 -4 -4 6.95 0.25
 -14 -4 4 7.03 0.25
 -14 -4 -4 7.2 0.23
 14 -4 4 7.9 0.24
 14 -4 4 7.34 0.25
 -14 4 4 7.24 0.25
 -14 -4 5 0.57 0.06
 -14 -4 5 0.65 0.06
 14 -4 -5 0.66 0.06
 -14 4 -5 0.74 0.06
 14 -4 -5 0.74 0.07
 14 -4 5 0.7 0.07
 -14 4 5 0.66 0.06
 -14 -4 -5 0.7 0.06
 14 -4 -6 10.66 0.36
 -14 -4 6 11.03 0.36
 -14 -4 6 11.17 0.36
 -14 4 -6 10.85 0.34
 14 -4 6 11.22 0.37
 -14 4 6 11.24 0.36
 -14 -4 -6 11.12 0.34
 -14 4 -7 0.56 0.06
 -14 -4 7 0.59 0.07
 -14 -4 7 0.55 0.07
 14 -4 -7 0.59 0.07
 -14 -4 -7 0.57 0.07
 -14 4 7 0.55 0.06
 14 -4 7 0.51 0.07
 -14 4 7 0.52 0.07
 -14 -4 8 2.33 0.13
 -14 4 -8 2.42 0.13
 -14 -4 8 2.54 0.14
 -14 4 8 2.5 0.13
 14 -4 8 2.58 0.14
 -14 -4 -8 2.38 0.13
 -14 4 8 2.76 0.14
 -14 -5 0 10.49 0.29
 14 5 0 10.93 0.29
 -14 5 0 10.67 0.3
 14 5 0 10.73 0.31
 14 -5 0 10.35 0.33
 14 -5 0 10.47 0.33
 -14 -5 0 10.83 0.32
 14 -5 -1 9.33 0.31
 -14 5 -1 9.69 0.27
 -14 -5 1 9.65 0.3
 14 -5 -1 9.6 0.31
 -14 -5 -1 9.63 0.27
 -14 5 1 9.86 0.27
 14 5 -1 9.51 0.29
 -14 -5 -1 9.88 0.28
 14 -5 1 9.6 0.3
 14 -5 1 9.43 0.3
 -14 5 -2 17.08 0.46
 -14 -5 2 16.3 0.49
 14 -5 -2 16.48 0.5
 14 -5 -2 16.68 0.5
 -14 -5 -2 17.48 0.46
 14 5 -2 17.37 0.49
 14 -5 2 17.43 0.5
 -14 5 2 16.6 0.45
 14 -5 2 16.52 0.5
 -14 -5 3 17.02 0.53
 -14 -5 3 18.75 0.52
 14 -5 -3 17.81 0.53
 14 -5 -3 17.91 0.54
 -14 5 -3 18.6 0.5
 -14 -5 -3 17.9 0.49
 14 -5 3 17.64 0.52
 14 -5 3 17.84 0.54
 -14 -5 4 12.22 0.37
 -14 5 -4 11.72 0.35
 14 -5 -4 11.93 0.38
 -14 -5 4 11.71 0.37
 14 -5 -4 12.14 0.38
 -14 -5 -4 12.03 0.35
 14 -5 4 11.97 0.36
 14 -5 4 11.69 0.38
 -14 5 -5 2.82 0.12
 14 -5 -5 2.87 0.13
 14 -5 -5 2.64 0.13
 -14 -5 5 2.84 0.13
 -14 -5 5 2.83 0.13
 -14 -5 -5 2.73 0.12
 -14 5 5 2.88 0.13
 14 -5 5 2.72 0.13
 14 -5 5 2.65 0.12
 -14 -5 6 2.26 0.12
 14 -5 -6 2.27 0.12
 -14 -5 6 2.32 0.12
 -14 5 -6 2.34 0.12
 14 -5 -6 2.45 0.12
 -14 5 6 2.29 0.12
 14 -5 6 2.52 0.13
 -14 -5 -6 2.19 0.11
 14 -5 -7 1.5 0.1
 -14 -5 7 1.44 0.1
 -14 -5 7 1.53 0.1
 -14 5 -7 1.44 0.1
 -14 5 7 1.41 0.1
 -14 5 7 1.5 0.09
 14 -5 7 1.42 0.1
 -14 -5 -7 1.28 0.09
 -14 5 -8 2.25 0.13
 -14 -5 8 2.31 0.13
 -14 -5 8 2.36 0.13
 -14 -5 -8 2.49 0.13
 14 -5 8 2.22 0.13
 -14 5 8 2.42 0.13
 14 -6 0 0.07 0.03
 -14 6 0 0.07 0.02
 -14 -6 0 0.05 0.03
 14 6 0 0.15 0.02
 14 -6 0 0.1 0.03
 14 -6 -1 10.04 0.33
 14 -6 -1 9.84 0.33
 -14 6 -1 10.95 0.3
 -14 -6 1 10.86 0.32
 14 -6 1 9.99 0.33
 -14 -6 -1 11.03 0.31
 14 -6 1 10.32 0.33
 -14 -6 -1 10.86 0.3
 -14 6 1 10.86 0.3
 -14 -6 2 3.31 0.14
 -14 -6 2 3.55 0.12
 14 -6 -2 3.5 0.14
 14 -6 -2 3.67 0.15
 -14 6 -2 3.6 0.13
 -14 6 2 3.32 0.11
 14 -6 2 3.3 0.14
 14 -6 2 3.41 0.14
 -14 -6 -2 3.51 0.12
 -14 -6 3 4.25 0.17
 14 -6 -3 4.1 0.17
 14 -6 -3 4.29 0.17
 -14 -6 3 4.38 0.15
 -14 6 -3 4.22 0.15
 14 -6 3 4.36 0.17
 14 -6 3 4.34 0.16
 -14 -6 -3 4.36 0.15
 14 -6 -4 3.08 0.14
 -14 6 -4 3.37 0.13
 -14 -6 4 3.2 0.13
 -14 -6 4 3.28 0.14
 14 -6 -4 3.27 0.14
 14 -6 4 3.23 0.14
 -14 -6 -4 3.32 0.13
 14 -6 4 3.11 0.13
 14 -6 -5 1.7 0.1
 -14 6 -5 1.47 0.09
 14 -6 -5 1.64 0.1
 -14 -6 5 1.47 0.1
 -14 -6 5 1.56 0.09
 -14 -6 -5 1.41 0.09
 14 -6 5 1.65 0.1
 14 -6 5 1.43 0.08
 -14 6 5 1.68 0.1
 14 -6 -6 1.06 0.09
 -14 -6 6 1.18 0.08
 14 -6 -6 1.19 0.09
 -14 -6 6 1.25 0.09
 -14 6 -6 1.43 0.09
 -14 -6 -6 1.51 0.09
 -14 6 6 1.24 0.09
 14 -6 6 1.27 0.09
 -14 6 -7 1.81 0.11
 -14 -6 7 1.72 0.11
 -14 -6 7 1.7 0.11
 14 -6 -7 1.65 0.11
 14 -6 7 1.84 0.11
 -14 6 7 1.65 0.11
 -14 -6 -7 1.8 0.11
 -14 6 7 1.52 0.1
 -14 6 -8 0.18 0.05
 -14 -6 8 0.14 0.06
 14 -6 8 0.13 0.06
 -14 -6 -8 0.13 0.06
 -14 6 8 0.15 0.06
 14 -7 0 1.44 0.08
 -14 7 0 1.36 0.07
 -14 -7 0 1.34 0.07
 14 7 0 1.48 0.07
 14 -7 0 1.43 0.08
 14 -7 -1 15.47 0.46
 -14 7 -1 15.43 0.43
 -14 -7 1 15.78 0.45
 14 -7 -1 14.15 0.46
 14 7 1 15.73 0.42
 14 -7 1 14.87 0.46
 -14 7 1 15.41 0.42
 14 -7 1 15.22 0.46
 -14 -7 -1 15.33 0.42
 14 -7 -2 0.88 0.07
 14 -7 -2 0.89 0.07
 -14 7 -2 0.87 0.06
 -14 -7 2 0.96 0.07
 14 -7 2 1.05 0.07
 -14 7 2 0.93 0.05
 14 -7 2 0.89 0.07
 -14 -7 -2 0.94 0.06
 14 -7 -3 1.35 0.08
 14 -7 -3 1.34 0.09
 -14 7 -3 1.22 0.08
 -14 -7 3 1.16 0.08
 14 -7 3 1.36 0.08
 -14 -7 -3 1.37 0.07
 14 -7 3 1.31 0.08
 14 -7 -4 3.2 0.14
 14 -7 -4 3.2 0.14
 -14 7 -4 3.15 0.13
 -14 -7 4 3.17 0.13
 -14 -7 4 3.28 0.14
 14 -7 4 3.23 0.14
 -14 -7 -4 3.21 0.13
 14 -7 4 3.09 0.14
 -14 7 -5 1.96 0.11
 -14 -7 5 1.88 0.11
 14 -7 -5 1.76 0.1
 -14 -7 5 1.64 0.1
 14 -7 -5 2 0.11
 -14 -7 -5 2.05 0.1
 14 -7 5 1.92 0.1
 14 -7 5 1.97 0.11
 -14 7 5 1.77 0.1
 14 -7 -6 0.84 0.08
 -14 -7 6 0.83 0.07
 -14 7 -6 0.78 0.08
 14 -7 -6 0.81 0.07
 -14 -7 6 0.87 0.08
 -14 -7 -6 0.91 0.08
 14 -7 6 0.91 0.08
 -14 7 6 0.72 0.07
 -14 -7 7 3.38 0.16
 14 -7 -7 3.28 0.16
 -14 7 -7 3.52 0.16
 -14 -7 7 3.16 0.15
 -14 7 7 3.22 0.15
 14 -7 7 3.39 0.16
 -14 -7 -7 3.25 0.15
 14 -8 0 0.33 0.05
 14 -8 0 0.35 0.05
 -14 -8 0 0.32 0.04
 14 8 0 0.36 0.04
 -14 8 0 0.38 0.04
 -14 8 -1 1.58 0.08
 14 -8 -1 1.67 0.1
 14 8 1 1.54 0.08
 -14 -8 1 1.59 0.08
 14 -8 -1 1.67 0.09
 -14 8 1 1.65 0.08
 14 -8 1 1.71 0.1
 14 -8 1 1.5 0.09
 -14 -8 2 1.65 0.09
 -14 8 -2 1.58 0.09
 14 -8 -2 1.55 0.09
 14 -8 -2 1.67 0.09
 14 -8 2 1.55 0.09
 -14 -8 -2 1.59 0.08
 14 -8 2 1.8 0.1
 -14 8 2 1.55 0.08
 -14 8 -3 3.04 0.13
 -14 -8 3 2.83 0.13
 14 -8 -3 3.05 0.13
 14 -8 -3 2.95 0.14
 -14 -8 -3 2.85 0.12
 14 -8 3 2.97 0.13
 14 -8 3 2.82 0.13
 -14 8 -4 1.16 0.08
 14 -8 -4 1.17 0.08
 -14 -8 4 1.29 0.09
 14 -8 -4 1.19 0.09
 14 -8 4 1.25 0.08
 14 -8 4 1.16 0.08
 -14 -8 -4 1.06 0.08
 14 -8 -5 2.29 0.12
 -14 8 -5 2.42 0.12
 14 -8 -5 2.32 0.12
 -14 -8 5 2.34 0.13
 -14 -8 -5 2.46 0.12
 14 -8 5 2.58 0.13
 14 -8 5 2.24 0.12
 -14 -8 6 2.64 0.14
 14 -8 -6 2.65 0.14
 14 -8 -6 2.5 0.13
 -14 8 -6 2.57 0.13
 14 -8 6 2.67 0.13
 14 -8 6 2.71 0.14
 -14 -8 -6 2.72 0.13
 -14 8 6 2.52 0.13
 -14 -8 7 1.6 0.11
 -14 -8 7 1.52 0.11
 -14 8 -7 1.75 0.11
 14 -8 7 1.78 0.12
 -14 -8 -7 1.8 0.11
 14 9 0 0.78 0.05
 14 -9 0 0.61 0.06
 14 -9 0 0.66 0.07
 -14 9 0 0.65 0.05
 14 -9 -1 1.18 0.08
 -14 -9 1 1.26 0.08
 14 -9 -1 1.16 0.08
 -14 9 -1 1.21 0.07
 14 9 1 1.11 0.07
 -14 9 1 1.12 0.07
 14 -9 1 1.19 0.08
 14 -9 1 1.18 0.08
 -14 -9 2 2.15 0.11
 -14 9 -2 2.25 0.11
 14 9 2 2.19 0.1
 14 -9 -2 2.2 0.12
 14 -9 -2 2.09 0.11
 14 -9 2 2.39 0.12
 -14 9 2 2.14 0.1
 -14 -9 -2 1.97 0.1
 14 -9 2 2.17 0.11
 14 -9 -3 0.49 0.06
 14 -9 -3 0.43 0.05
 -14 9 -3 0.56 0.06
 -14 -9 3 0.41 0.06
 14 -9 3 0.44 0.06
 -14 -9 -3 0.43 0.05
 14 -9 3 0.53 0.06
 -14 9 -4 0.38 0.06
 -14 -9 4 0.27 0.06
 14 -9 -4 0.21 0.05
 14 -9 -4 0.23 0.05
 14 -9 4 0.25 0.05
 14 -9 4 0.23 0.05
 -14 -9 -4 0.26 0.05
 -14 -9 5 1.46 0.1
 -14 9 -5 1.49 0.1
 14 -9 -5 1.4 0.1
 -14 -9 -5 1.54 0.1
 14 -9 5 1.62 0.1
 14 -9 5 1.61 0.1
 -14 -9 6 2.08 0.13
 -14 9 -6 2.18 0.12
 -14 9 6 1.99 0.12
 -14 -9 -6 2.31 0.12
 14 -9 6 2.35 0.13
 14 -9 6 2 0.11
 14 -10 0 3.71 0.15
 -14 10 0 3.76 0.15
 14 10 0 3.5 0.14
 14 -10 0 3.94 0.17
 14 -10 -1 2 0.11
 -14 -10 1 1.8 0.09
 14 -10 -1 1.7 0.09
 -14 10 -1 1.83 0.1
 14 10 1 1.75 0.09
 14 -10 1 1.96 0.11
 14 -10 1 1.79 0.1
 -14 10 1 1.66 0.09
 14 -10 -2 0 0.01
 14 10 2 0.02 0.01
 14 -10 -2 0 0.02
 -14 -10 2 0.01 0.02
 -14 10 -2 0.02 0.02
 14 -10 2 0 0.01
 -14 10 2 0.01 0.01
 14 -10 2 0 0.02
 14 -10 -3 0.87 0.08
 14 -10 -3 0.96 0.08
 -14 -10 3 1.04 0.08
 -14 10 -3 0.95 0.08
 14 10 3 0.95 0.07
 14 -10 3 1.05 0.08
 -14 -10 -3 0.88 0.07
 14 -10 3 1 0.08
 -14 -10 4 1.28 0.09
 14 -10 -4 1.25 0.09
 -14 10 -4 1.33 0.09
 -14 -10 -4 1.32 0.09
 14 -10 4 1.22 0.09
 14 -10 4 1.32 0.09
 -14 10 -5 0.21 0.06
 -14 -10 5 0.14 0.06
 14 -10 -5 0.21 0.06
 14 -10 5 0.27 0.06
 14 -10 5 0.17 0.06
 -14 -10 -5 0.23 0.06
 -14 -10 6 2.26 0.15
 -14 10 -6 2.44 0.13
 14 -10 6 2.46 0.13
 -14 -10 -6 2.59 0.13
 14 -10 6 2.58 0.14
 14 -11 0 4.16 0.18
 14 -11 0 3.95 0.16
 -14 11 0 3.96 0.16
 -14 11 -1 0.26 0.05
 14 11 1 0.14 0.04
 14 -11 -1 0.27 0.06
 -14 -11 1 0.28 0.05
 14 -11 1 0.19 0.05
 14 -11 1 0.22 0.05
 -14 11 1 0.28 0.05
 -14 -11 2 0.02 0.02
 14 11 2 0.02 0.01
 14 -11 -2 0 0.02
 -14 11 -2 0.02 0.02
 14 -11 2 0.01 0.02
 -14 11 2 0.06 0.04
 14 -11 2 0.09 0.04
 14 11 3 0.49 0.06
 -14 11 -3 0.5 0.07
 -14 -11 3 0.57 0.07
 14 -11 -3 0.55 0.07
 -14 -11 -3 0.43 0.06
 14 -11 3 0.51 0.06
 14 -11 3 0.59 0.07
 14 -11 -4 3.87 0.18
 -14 11 -4 4.13 0.17
 -14 -11 4 4.18 0.18
 14 11 4 3.78 0.16
 14 -11 4 4.13 0.18
 14 -11 4 3.94 0.17
 -14 -11 -4 4.03 0.17
 14 -11 -5 0.02 0.02
 -14 11 -5 0.14 0.06
 -14 -11 5 0.03 0.02
 14 -11 5 0.03 0.02
 -14 -11 -5 0.03 0.02
 14 -11 5 0.11 0.05
 -14 12 0 0.31 0.05
 14 -12 0 0.2 0.06
 14 -12 -1 0.91 0.08
 14 12 1 0.88 0.07
 -14 12 -1 1.02 0.08
 14 -12 1 1.03 0.09
 -14 12 1 1.05 0.08
 -14 12 -2 0.69 0.07
 14 12 2 0.62 0.06
 -14 -12 2 0.61 0.07
 14 -12 -2 0.68 0.08
 14 -12 2 0.56 0.06
 14 -12 2 0.67 0.08
 -14 12 2 0.62 0.07
 14 -12 -3 0.07 0.05
 -14 -12 3 0.02 0.02
 14 12 3 0.03 0.02
 -14 12 -3 0 0.02
 14 -12 3 0.08 0.04
 14 -12 3 0.04 0.02
 14 -12 -4 0.48 0.07
 14 12 4 0.47 0.07
 -14 -12 4 0.64 0.07
 -14 12 -4 0.51 0.07
 14 -12 4 0.51 0.07
 -14 -12 -4 0.46 0.06
 14 -12 4 0.53 0.06
 -14 13 0 1.72 0.1
 14 -13 0 1.55 0.11
 -14 13 -1 0.26 0.06
 14 -13 -1 0.2 0.06
 14 -13 1 0.24 0.06
 -14 13 1 0.18 0.05
 14 13 2 3.65 0.16
 -14 13 -2 3.72 0.16
 14 -13 -2 3.78 0.18
 -14 13 2 3.6 0.16
 14 -13 2 3.43 0.17
 15 0 0 0.06 0.03
 -15 0 0 0.06 0.02
 -15 0 1 0.06 0.02
 15 0 -1 0.07 0.03
 15 0 1 0.04 0.02
 -15 0 -1 0.04 0.02
 15 0 -1 0.05 0.02
 15 0 2 0.05 0.02
 -15 0 2 0 0.01
 15 0 2 0.01 0.01
 15 0 -2 0.01 0.01
 -15 0 -2 0 0.01
 15 0 -2 0.01 0.01
 15 0 3 -0.01 0.01
 -15 0 -3 0 0.01
 15 0 -3 0 0.01
 15 0 3 0 0.01
 -15 0 3 0.13 0.04
 15 0 4 -0.01 0.01
 -15 0 4 0.02 0.01
 15 0 -4 -0.01 0.01
 -15 0 -4 -0.01 0.01
 -15 0 5 0.02 0.02
 15 0 5 0 0.01
 15 0 -5 0 0.01
 -15 0 -5 0 0.01
 15 0 -6 0.01 0.01
 -15 0 6 0 0.01
 -15 0 -6 -0.03 0.01
 -15 0 6 -0.01 0.02
 15 0 6 0 0.01
 -15 0 -7 0.02 0.02
 15 0 7 0 0.01
 -15 0 7 0.01 0.01
 -15 0 7 -0.02 0.02
 15 0 8 0.09 0.05
 -15 0 8 0.1 0.05
 -15 0 -8 0.01 0.02
 -15 0 8 0.02 0.02
 -15 -1 0 1.26 0.06
 15 1 0 1.28 0.06
 -15 1 0 1.18 0.04
 15 1 0 1.23 0.06
 15 -1 0 1.12 0.06
 15 -1 0 1.19 0.07
 15 1 1 41.09 1.15
 -15 -1 1 41.53 1.16
 15 1 1 43.25 1.17
 15 -1 -1 43.89 1.18
 -15 1 -1 41.36 1.07
 15 -1 -1 42.79 1.16
 15 1 -1 40.45 1.17
 15 -1 1 45.42 1.18
 -15 1 1 40.62 1.16
 -15 -1 -1 42.52 1.07
 -15 -1 -1 42.5 1.15
 15 -1 1 43.09 1.16
 15 1 -1 41.04 1.16
 15 1 2 4.12 0.14
 -15 -1 2 4 0.15
 15 -1 -2 4.01 0.15
 15 -1 -2 4.09 0.15
 -15 1 -2 4.07 0.13
 15 1 2 4.1 0.13
 15 -1 2 3.84 0.14
 15 -1 2 3.91 0.15
 -15 1 2 3.88 0.15
 -15 -1 -2 4.12 0.13
 15 1 -2 4.05 0.15
 -15 -1 -2 4.37 0.13
 -15 1 -3 6.78 0.2
 -15 -1 3 6.42 0.22
 15 -1 -3 6.96 0.23
 15 -1 -3 6.64 0.23
 15 1 3 6.82 0.22
 -15 1 3 6.37 0.22
 -15 -1 -3 6.52 0.2
 15 -1 3 6.8 0.22
 15 -1 3 6.84 0.21
 15 1 -3 6.53 0.23
 15 1 4 8.11 0.26
 15 -1 -4 7.88 0.27
 -15 1 -4 8.46 0.25
 -15 -1 4 8.02 0.27
 -15 1 4 8.13 0.27
 15 -1 4 8.27 0.27
 -15 -1 -4 7.97 0.25
 15 1 -4 8.31 0.27
 -15 -1 5 2.46 0.12
 15 -1 -5 2.76 0.13
 15 1 5 2.29 0.11
 -15 1 -5 2.62 0.11
 15 1 -5 2.62 0.13
 15 -1 5 2.46 0.11
 -15 1 5 2.69 0.12
 -15 -1 -5 2.41 0.11
 15 1 6 2.17 0.1
 15 -1 -6 2.2 0.12
 -15 -1 6 2.11 0.11
 -15 -1 6 2.08 0.11
 -15 1 -6 1.92 0.11
 -15 -1 -6 1.93 0.1
 15 1 -6 2.07 0.12
 15 -1 6 2.09 0.11
 -15 1 6 2.14 0.11
 -15 1 6 2.33 0.12
 -15 1 -7 -0.01 0.02
 -15 -1 7 0.02 0.02
 15 1 7 0 0.01
 -15 -1 7 0 0.02
 15 -1 7 0 0.01
 -15 -1 -7 0.01 0.02
 -15 1 7 0.06 0.04
 -15 1 7 0.01 0.02
 15 1 8 1.27 0.1
 -15 -1 8 1.38 0.1
 -15 1 -8 1.5 0.1
 -15 -1 8 1.48 0.1
 15 -1 8 1.08 0.09
 -15 -1 -8 1.16 0.09
 -15 1 8 1.46 0.11
 -15 1 8 1.39 0.1
 15 -2 0 11.1 0.34
 -15 -2 0 10.74 0.32
 15 -2 0 11.05 0.33
 -15 2 0 10.96 0.29
 15 2 0 11.17 0.33
 15 -2 -1 5.53 0.19
 15 2 1 5.79 0.18
 -15 -2 1 5.43 0.19
 -15 2 -1 5.68 0.17
 15 -2 -1 5.92 0.2
 15 -2 1 5.63 0.19
 15 -2 1 5.6 0.19
 15 2 -1 5.59 0.19
 -15 -2 -1 6.01 0.16
 -15 -2 -1 5.75 0.18
 15 2 2 27.26 0.76
 -15 -2 2 27.18 0.76
 -15 2 -2 26.31 0.71
 15 -2 -2 26.73 0.77
 15 -2 -2 26.29 0.78
 -15 -2 -2 27.27 0.74
 15 2 -2 28.51 0.77
 15 -2 2 27.08 0.75
 -15 2 2 26.82 0.76
 15 -2 2 26.89 0.77
 -15 -2 -2 27.52 0.7
 15 2 3 1.26 0.06
 15 -2 -3 1.18 0.08
 15 -2 -3 1.3 0.08
 -15 2 -3 1.2 0.06
 -15 -2 3 1.26 0.07
 -15 -2 -3 1.23 0.06
 15 2 -3 1.14 0.07
 15 -2 3 1.34 0.06
 -15 2 3 1.33 0.08
 15 -2 3 1.26 0.07
 15 2 4 0.51 0.04
 -15 -2 4 0.44 0.05
 15 -2 -4 0.35 0.05
 -15 2 -4 0.35 0.04
 15 -2 -4 0.47 0.05
 15 -2 4 0.51 0.05
 15 2 -4 0.39 0.05
 -15 -2 -4 0.43 0.05
 -15 2 4 0.51 0.05
 15 2 5 3.98 0.15
 15 -2 -5 3.8 0.17
 -15 2 -5 4.23 0.16
 -15 -2 5 3.78 0.16
 -15 -2 5 4.01 0.17
 15 -2 5 4.04 0.16
 -15 -2 -5 4.26 0.15
 15 2 -5 4.22 0.17
 -15 2 5 4.12 0.16
 -15 -2 6 5.12 0.2
 -15 -2 6 5.09 0.2
 -15 2 -6 5.09 0.19
 15 -2 -6 4.97 0.2
 15 2 6 4.84 0.18
 15 -2 6 5 0.2
 -15 -2 -6 5.02 0.19
 -15 2 6 5.18 0.2
 -15 -2 7 0.75 0.08
 -15 2 -7 0.85 0.07
 -15 -2 7 0.85 0.08
 15 -2 -7 0.82 0.08
 15 -2 7 0.75 0.07
 -15 2 7 0.74 0.08
 -15 -2 -7 0.77 0.07
 -15 2 7 0.82 0.08
 -15 2 -8 4.5 0.19
 -15 -2 8 4.46 0.19
 -15 -2 8 4.31 0.19
 -15 2 8 4.37 0.19
 -15 2 8 4.52 0.18
 15 -2 8 4.16 0.19
 -15 -2 -8 4.32 0.18
 -15 3 0 3.68 0.11
 -15 -3 0 3.51 0.13
 15 -3 0 3.72 0.14
 15 3 0 3.51 0.12
 -15 -3 0 3.42 0.11
 15 -3 0 3.55 0.14
 15 3 1 10.17 0.29
 15 -3 -1 9.62 0.31
 -15 -3 1 9.56 0.3
 15 -3 -1 9.16 0.3
 -15 3 -1 9.6 0.27
 15 -3 1 9.64 0.3
 -15 -3 -1 9.9 0.28
 15 -3 1 10.26 0.3
 15 3 -1 9.64 0.3
 -15 -3 -1 9.6 0.26
 15 3 2 0.78 0.04
 -15 -3 2 0.72 0.06
 15 -3 -2 0.67 0.05
 15 -3 -2 0.71 0.06
 -15 3 -2 0.76 0.05
 15 -3 2 0.81 0.05
 15 -3 2 0.76 0.05
 15 3 -2 0.68 0.05
 -15 -3 -2 0.84 0.05
 -15 -3 3 8.6 0.28
 -15 3 -3 8.82 0.26
 15 -3 -3 9.4 0.29
 15 3 3 9.02 0.27
 15 -3 -3 8.47 0.29
 15 3 -3 8.95 0.28
 -15 -3 -3 9.04 0.26
 15 -3 3 9.02 0.27
 -15 3 3 8.65 0.29
 15 -3 3 8.4 0.28
 15 -3 -4 0.79 0.07
 -15 -3 4 0.82 0.06
 15 3 4 0.83 0.05
 -15 -3 4 0.81 0.07
 15 -3 -4 0.77 0.07
 -15 3 -4 0.86 0.06
 -15 3 4 0.79 0.06
 15 -3 4 0.88 0.07
 15 3 -4 0.69 0.06
 15 -3 4 0.87 0.05
 -15 -3 -4 0.73 0.06
 -15 3 -5 0.23 0.04
 -15 -3 5 0.21 0.05
 -15 -3 5 0.16 0.04
 15 -3 -5 0.22 0.05
 15 -3 -5 0.23 0.05
 15 -3 5 0.23 0.05
 -15 -3 -5 0.25 0.04
 -15 3 5 0.17 0.05
 -15 -3 6 2.27 0.12
 -15 -3 6 2.28 0.12
 -15 3 -6 2.4 0.12
 15 -3 -6 2.26 0.12
 -15 3 6 2.29 0.12
 -15 -3 -6 2.1 0.11
 15 -3 6 2.29 0.12
 -15 -3 7 0.61 0.07
 15 -3 -7 0.71 0.08
 -15 -3 7 0.69 0.08
 -15 3 -7 0.82 0.08
 15 -3 7 0.64 0.07
 -15 -3 -7 0.73 0.07
 -15 3 7 0.8 0.08
 -15 3 7 0.63 0.07
 -15 3 -8 2.76 0.14
 -15 -3 8 2.91 0.15
 -15 -3 8 2.59 0.14
 -15 -3 -8 2.59 0.14
 -15 3 8 2.73 0.15
 15 -3 8 2.87 0.15
 -15 3 8 2.72 0.14
 -15 4 0 9.55 0.26
 -15 -4 0 9.36 0.28
 -15 -4 0 9.35 0.26
 15 4 0 9.27 0.28
 15 -4 0 9.34 0.3
 15 -4 0 9.65 0.3
 -15 -4 1 6.1 0.2
 15 4 1 6.45 0.19
 15 -4 -1 5.99 0.21
 -15 4 -1 6.08 0.18
 15 -4 -1 6.13 0.21
 -15 -4 -1 6.08 0.18
 15 4 -1 6 0.2
 15 -4 1 6.24 0.21
 -15 -4 -1 6.51 0.19
 15 -4 1 6.02 0.21
 -15 4 1 6.38 0.18
 -15 4 -2 0.25 0.03
 15 -4 -2 0.25 0.04
 -15 -4 2 0.21 0.04
 15 4 2 0.24 0.03
 15 -4 -2 0.16 0.04
 -15 -4 -2 0.26 0.03
 15 4 -2 0.15 0.03
 15 -4 2 0.24 0.04
 15 -4 2 0.29 0.04
 15 -4 -3 6.14 0.22
 -15 4 -3 6.38 0.2
 15 -4 -3 6.52 0.22
 -15 -4 3 6.13 0.22
 15 -4 3 6.34 0.21
 -15 -4 -3 6.42 0.2
 15 -4 3 6.13 0.22
 15 4 -3 6.25 0.21
 15 -4 -4 1.34 0.09
 -15 -4 4 1.42 0.08
 -15 -4 4 1.26 0.08
 15 -4 -4 1.3 0.09
 -15 4 -4 1.28 0.08
 15 -4 4 1.4 0.07
 -15 4 4 1.39 0.09
 15 -4 4 1.3 0.08
 15 4 -4 1.3 0.08
 -15 -4 -4 1.24 0.07
 -15 -4 5 3.39 0.15
 -15 4 -5 3.26 0.13
 15 -4 -5 3.01 0.14
 15 -4 -5 3.11 0.14
 -15 -4 5 3.22 0.14
 -15 -4 -5 3.18 0.13
 -15 4 5 3.19 0.14
 15 -4 5 3.09 0.14
 15 -4 -6 1.88 0.11
 -15 -4 6 1.96 0.11
 -15 -4 6 1.95 0.11
 -15 4 -6 1.91 0.11
 15 -4 6 1.84 0.11
 -15 4 6 1.86 0.11
 -15 -4 -6 1.99 0.11
 -15 4 -7 2.27 0.12
 -15 -4 7 2.21 0.12
 -15 -4 7 2.16 0.13
 15 -4 -7 2.32 0.13
 -15 -4 -7 2.19 0.12
 -15 4 7 2.23 0.12
 15 -4 7 2.29 0.13
 -15 4 7 2.26 0.13
 -15 4 -8 0.92 0.09
 -15 -4 8 0.91 0.09
 -15 -4 8 0.96 0.09
 15 -4 8 0.96 0.09
 -15 4 8 0.99 0.09
 -15 4 8 1.01 0.08
 -15 -4 -8 1 0.09
 15 5 0 16.59 0.47
 -15 5 0 16.31 0.44
 15 -5 0 16.11 0.49
 -15 -5 0 16.67 0.47
 15 -5 0 16.36 0.49
 -15 -5 1 11.71 0.35
 15 -5 -1 11.85 0.37
 -15 5 -1 12 0.33
 15 -5 -1 11.09 0.37
 15 -5 1 11.09 0.36
 15 5 -1 12.07 0.35
 -15 -5 -1 12.43 0.34
 15 -5 1 11.65 0.36
 -15 -5 -1 11.94 0.32
 -15 5 1 12.07 0.32
 -15 -5 2 13.62 0.4
 -15 5 -2 12.98 0.37
 15 -5 -2 12.44 0.4
 15 -5 -2 12.36 0.4
 15 -5 2 13.64 0.4
 15 -5 2 13.51 0.41
 -15 -5 -2 13.05 0.36
 15 5 -2 12.97 0.39
 15 -5 -3 9.93 0.33
 -15 -5 3 10.45 0.32
 15 -5 -3 10.1 0.33
 -15 5 -3 10.25 0.3
 -15 -5 3 10 0.32
 15 -5 3 10.27 0.33
 -15 -5 -3 10.23 0.3
 15 -5 3 9.83 0.32
 15 5 -3 10.77 0.32
 15 -5 -4 0.02 0.02
 -15 5 -4 0.07 0.04
 -15 -5 4 0.07 0.04
 -15 -5 4 0.07 0.04
 15 -5 -4 0.08 0.04
 15 -5 4 0.07 0.04
 -15 -5 -4 0.09 0.03
 -15 5 4 0.08 0.04
 15 -5 4 0.03 0.02
 15 -5 -5 3.5 0.16
 -15 5 -5 3.45 0.14
 15 -5 -5 3.54 0.16
 -15 -5 5 3.34 0.15
 -15 -5 5 3.59 0.16
 -15 -5 -5 3.44 0.14
 15 -5 5 3.35 0.14
 -15 5 5 3.39 0.15
 15 -5 5 3.7 0.16
 -15 -5 6 3.21 0.14
 15 -5 -6 2.98 0.15
 15 -5 -6 3.13 0.15
 -15 -5 6 3.32 0.15
 -15 5 -6 3.25 0.14
 -15 5 6 3.16 0.14
 -15 -5 -6 3.02 0.14
 15 -5 6 3.16 0.15
 -15 -5 7 0.39 0.06
 15 -5 -7 0.38 0.06
 -15 -5 7 0.42 0.07
 -15 5 -7 0.33 0.06
 -15 5 7 0.46 0.07
 15 -5 7 0.3 0.06
 -15 5 7 0.37 0.06
 -15 -5 -7 0.42 0.06
 -15 -5 8 1.43 0.11
 -15 5 -8 1.29 0.1
 -15 -5 8 1.42 0.1
 15 -5 8 1.39 0.1
 -15 -5 -8 1.48 0.1
 -15 5 8 1.53 0.1
 15 -6 0 0.09 0.03
 -15 6 0 0.12 0.03
 -15 -6 0 0.06 0.03
 15 -6 0 0.04 0.03
 15 -6 -1 29.14 0.84
 -15 -6 1 29.99 0.82
 -15 6 -1 29.15 0.77
 15 -6 -1 29.6 0.84
 -15 6 1 29.69 0.76
 -15 -6 -1 29.44 0.76
 15 -6 1 29.16 0.83
 15 -6 1 27.94 0.84
 15 -6 -2 2.22 0.11
 -15 -6 2 2.3 0.11
 15 -6 -2 2.44 0.11
 -15 6 -2 2.25 0.1
 15 -6 2 2.1 0.1
 15 -6 2 2.06 0.1
 -15 -6 -2 2.31 0.09
 15 -6 -3 4.63 0.18
 -15 -6 3 4.35 0.17
 15 -6 -3 4.26 0.17
 -15 6 -3 4.69 0.16
 -15 -6 3 4.46 0.16
 15 -6 3 4.32 0.17
 15 -6 3 4.46 0.17
 -15 -6 -3 4.58 0.16
 15 -6 -4 10.13 0.33
 -15 -6 4 9.98 0.32
 15 -6 -4 10.09 0.33
 -15 6 -4 10.33 0.31
 -15 -6 4 9.99 0.33
 15 -6 4 9.93 0.33
 15 -6 4 9.83 0.32
 -15 -6 -4 9.84 0.3
 -15 6 -5 10.37 0.31
 15 -6 -5 10.13 0.33
 -15 -6 5 9.58 0.32
 15 -6 -5 9.85 0.33
 -15 -6 5 10.1 0.33
 15 -6 5 9.28 0.31
 15 -6 5 9.65 0.33
 -15 6 5 9.9 0.33
 -15 -6 -5 10.12 0.31
 15 -6 -6 9.18 0.32
 -15 6 -6 9.78 0.31
 -15 -6 6 10 0.33
 15 -6 -6 9.74 0.33
 -15 -6 6 9.42 0.32
 15 -6 6 9.79 0.33
 -15 -6 -6 9.51 0.31
 -15 6 6 9.38 0.32
 -15 -6 7 1.97 0.12
 -15 -6 7 1.99 0.12
 -15 6 -7 1.9 0.12
 15 -6 -7 1.69 0.11
 15 -6 7 2.28 0.13
 -15 -6 -7 1.92 0.11
 -15 6 7 2 0.12
 -15 6 7 1.97 0.11
 15 -7 0 0.87 0.07
 -15 7 0 0.78 0.05
 -15 -7 0 0.77 0.05
 15 -7 0 0.74 0.06
 15 -7 -1 1.3 0.08
 15 7 1 1.24 0.06
 15 -7 -1 1.28 0.08
 -15 -7 1 1.24 0.07
 -15 7 -1 1.31 0.07
 -15 7 1 1.29 0.06
 15 -7 1 1.18 0.08
 15 -7 1 1.29 0.08
 -15 -7 -1 1.27 0.06
 -15 -7 2 0.58 0.06
 15 -7 -2 0.54 0.06
 -15 7 -2 0.67 0.05
 15 -7 -2 0.6 0.06
 15 -7 2 0.7 0.06
 15 -7 2 0.66 0.06
 -15 -7 -2 0.6 0.05
 -15 7 -3 0.22 0.04
 15 -7 -3 0.35 0.05
 -15 -7 3 0.32 0.05
 15 -7 -3 0.33 0.05
 15 -7 3 0.35 0.05
 -15 -7 -3 0.31 0.04
 15 -7 3 0.3 0.04
 15 -7 -4 0.83 0.07
 -15 7 -4 0.68 0.06
 15 -7 -4 0.68 0.07
 -15 -7 4 0.81 0.07
 -15 -7 -4 0.76 0.06
 15 -7 4 0.62 0.06
 15 -7 4 0.73 0.07
 15 -7 -5 5.67 0.22
 15 -7 -5 5.47 0.22
 -15 -7 5 5.72 0.22
 -15 7 -5 5.66 0.21
 -15 -7 5 5.08 0.2
 -15 -7 -5 5.77 0.2
 15 -7 5 5.62 0.22
 -15 7 5 5.58 0.21
 15 -7 5 5.35 0.2
 -15 -7 6 4.49 0.18
 15 -7 -6 4.21 0.19
 15 -7 -6 4.67 0.19
 -15 7 -6 4.4 0.18
 -15 -7 6 4.5 0.19
 15 -7 6 4.9 0.2
 -15 -7 -6 4.57 0.18
 -15 7 6 4.57 0.19
 -15 -7 7 2.94 0.15
 -15 -7 7 2.92 0.15
 -15 7 -7 3.15 0.15
 15 -7 -7 3.05 0.15
 -15 7 7 3.06 0.15
 -15 7 7 3.15 0.15
 -15 -7 -7 3.18 0.15
 15 -7 7 3.11 0.16
 -15 8 0 0.66 0.05
 15 -8 0 0.68 0.07
 -15 -8 0 0.73 0.05
 15 -8 0 0.69 0.06
 15 8 1 0.21 0.04
 15 -8 -1 0.25 0.05
 -15 8 -1 0.29 0.04
 15 -8 -1 0.3 0.05
 -15 -8 1 0.21 0.04
 15 -8 1 0.31 0.05
 -15 8 1 0.31 0.04
 15 -8 1 0.31 0.05
 -15 -8 2 2.36 0.11
 -15 8 -2 2.27 0.11
 15 -8 -2 2.48 0.12
 15 -8 -2 2.38 0.11
 15 -8 2 2.38 0.12
 -15 -8 -2 2.4 0.1
 15 -8 2 2.25 0.11
 -15 8 2 2.17 0.1
 15 -8 -3 0.51 0.06
 15 -8 -3 0.66 0.07
 -15 -8 3 0.47 0.06
 -15 8 -3 0.5 0.06
 15 -8 3 0.55 0.06
 15 -8 3 0.69 0.06
 -15 -8 -3 0.61 0.05
 -15 8 -4 5.65 0.21
 -15 -8 4 6.15 0.22
 15 -8 -4 5.95 0.22
 15 -8 -4 5.97 0.23
 15 -8 4 5.92 0.22
 15 -8 4 5.82 0.22
 -15 -8 -4 5.72 0.2
 -15 8 -5 0.4 0.06
 -15 -8 5 0.43 0.07
 15 -8 -5 0.42 0.06
 15 -8 -5 0.54 0.07
 15 -8 5 0.48 0.06
 -15 -8 -5 0.43 0.06
 15 -8 5 0.42 0.06
 15 -8 -6 0.28 0.06
 -15 -8 6 0.23 0.06
 -15 8 -6 0.4 0.06
 15 -8 -6 0.28 0.06
 -15 -8 -6 0.29 0.06
 15 -8 6 0.3 0.06
 -15 8 6 0.42 0.06
 -15 8 -7 1.81 0.12
 -15 -8 -7 1.86 0.11
 -15 8 7 1.68 0.11
 15 -8 7 1.95 0.12
 -15 9 0 0.43 0.05
 15 -9 0 0.51 0.05
 15 -9 0 0.51 0.06
 -15 9 -1 3.98 0.15
 15 -9 -1 4.26 0.17
 15 -9 -1 3.98 0.16
 15 9 1 4.02 0.14
 -15 -9 1 3.75 0.15
 15 -9 1 4.14 0.16
 -15 9 1 3.7 0.14
 15 -9 1 4.32 0.17
 -15 9 -2 3.83 0.15
 15 -9 -2 3.94 0.16
 15 9 2 3.72 0.14
 15 -9 -2 3.85 0.17
 -15 -9 2 3.91 0.16
 15 -9 2 3.77 0.16
 -15 -9 -2 3.79 0.14
 -15 9 2 3.59 0.14
 15 -9 2 3.77 0.16
 -15 -9 3 1.39 0.09
 15 -9 -3 1.38 0.09
 15 -9 -3 1.53 0.1
 -15 9 -3 1.38 0.09
 15 -9 3 1.75 0.1
 15 -9 3 1.54 0.1
 -15 -9 -3 1.38 0.08
 -15 9 -4 4.65 0.18
 15 -9 -4 4.35 0.19
 15 -9 -4 4.41 0.18
 -15 -9 4 4.71 0.19
 15 -9 4 4.53 0.19
 -15 -9 -4 4.48 0.17
 15 -9 4 4.7 0.19
 -15 9 -5 1.63 0.1
 -15 -9 5 1.54 0.11
 15 -9 -5 1.39 0.1
 15 -9 -5 1.54 0.1
 -15 -9 -5 1.48 0.09
 15 -9 5 1.52 0.1
 15 -9 5 1.53 0.1
 -15 9 -6 2.7 0.14
 -15 -9 6 2.73 0.15
 15 -9 -6 2.61 0.14
 15 -9 6 2.94 0.15
 -15 -9 -6 2.99 0.14
 15 -9 6 3 0.14
 -15 9 6 2.86 0.14
 15 -10 0 2.45 0.13
 15 -10 0 2.18 0.11
 -15 10 0 2.3 0.11
 15 -10 -1 3.25 0.15
 -15 -10 1 3.09 0.14
 15 -10 -1 3.18 0.14
 -15 10 -1 3.12 0.13
 15 10 1 3.15 0.13
 15 -10 1 3.32 0.14
 15 -10 1 3.44 0.15
 -15 10 1 3 0.13
 15 -10 -2 0.51 0.06
 15 10 2 0.51 0.05
 15 -10 -2 0.62 0.06
 -15 -10 2 0.61 0.06
 -15 10 -2 0.56 0.06
 -15 10 2 0.67 0.06
 15 -10 2 0.59 0.06
 15 -10 2 0.6 0.06
 15 -10 -3 3.01 0.15
 15 10 3 2.58 0.12
 -15 -10 3 2.91 0.14
 -15 10 -3 2.76 0.13
 15 -10 -3 2.73 0.13
 15 -10 3 3.03 0.14
 -15 -10 -3 2.87 0.13
 15 -10 3 3.08 0.14
 -15 10 -4 2.44 0.13
 -15 -10 4 2.66 0.14
 15 -10 -4 2.49 0.14
 15 -10 4 2.63 0.13
 15 -10 4 2.58 0.13
 -15 -10 -4 2.55 0.12
 -15 10 -5 2.62 0.14
 -15 -10 5 2.52 0.14
 15 -10 -5 2.58 0.14
 -15 -10 -5 2.49 0.13
 15 -10 5 2.69 0.14
 15 -10 5 2.8 0.14
 15 -11 0 1.96 0.12
 -15 11 0 1.86 0.1
 15 -11 0 1.76 0.1
 -15 11 -1 1.19 0.08
 15 -11 -1 1.18 0.08
 15 -11 -1 1.09 0.09
 15 -11 1 1.21 0.09
 -15 11 1 1.02 0.08
 15 -11 1 1.1 0.08
 -15 11 -2 0.34 0.06
 -15 -11 2 0.33 0.05
 15 -11 -2 0.3 0.06
 15 11 2 0.29 0.05
 15 -11 2 0.33 0.05
 15 -11 2 0.3 0.06
 -15 11 2 0.29 0.05
 -15 11 -3 0.96 0.08
 15 -11 -3 1.01 0.09
 -15 -11 3 0.95 0.08
 15 11 3 0.83 0.07
 -15 -11 -3 0.9 0.07
 15 -11 3 0.9 0.08
 15 -11 3 0.84 0.08
 15 -11 -4 2.41 0.13
 15 11 4 2.31 0.12
 -15 -11 4 2.57 0.13
 -15 11 -4 2.25 0.12
 15 -11 4 2.22 0.12
 -15 -11 -4 2.34 0.12
 15 -11 4 2.46 0.13
 -15 11 -5 0.49 0.07
 15 -11 5 0.46 0.07
 -15 -11 -5 0.66 0.07
 15 -12 0 5.93 0.24
 -15 12 0 6.22 0.22
 15 -12 -1 2.08 0.12
 -15 12 -1 2.12 0.11
 -15 12 1 2.03 0.11
 15 -12 1 2.13 0.13
 15 -12 -2 0.49 0.07
 -15 -12 2 0.42 0.06
 -15 12 -2 0.44 0.06
 15 12 2 0.56 0.06
 15 -12 2 0.56 0.06
 15 -12 2 0.53 0.07
 -15 12 -3 1.93 0.12
 15 -12 -3 2.18 0.13
 -15 -12 3 2.21 0.12
 15 12 3 2.16 0.11
 15 -12 3 2.22 0.12
 15 -12 3 2.04 0.13
 -15 13 0 5.05 0.19
 15 -13 0 4.83 0.21
 -15 13 -1 1.51 0.1
 15 -13 -1 1.47 0.11
 15 -13 1 1.32 0.1
 -15 13 1 1.59 0.1
 16 0 0 4.71 0.17
 -16 0 0 4.96 0.17
 16 0 0 4.88 0.17
 16 0 -1 10.97 0.33
 16 0 -1 10.75 0.33
 -16 0 -1 11.33 0.32
 16 0 1 10.4 0.33
 -16 0 1 10.27 0.33
 16 0 1 10.14 0.32
 -16 0 -1 11.32 0.29
 16 0 2 2.36 0.1
 16 0 -2 2.06 0.1
 -16 0 -2 2.08 0.08
 16 0 2 2.25 0.09
 -16 0 2 2.07 0.1
 16 0 -2 2.14 0.1
 16 0 3 32.58 0.91
 -16 0 -3 32.94 0.85
 16 0 -3 31.68 0.92
 -16 0 -4 6.14 0.2
 -16 0 4 6.17 0.22
 16 0 4 5.94 0.21
 16 0 -4 6.23 0.22
 16 0 -5 1.92 0.11
 -16 0 5 1.87 0.1
 -16 0 -5 1.92 0.09
 16 0 5 1.9 0.1
 16 0 -6 1.24 0.09
 16 0 6 1.13 0.08
 -16 0 -6 1.22 0.08
 -16 0 6 1.36 0.09
 -16 0 6 1.11 0.08
 -16 0 -7 3.29 0.14
 -16 0 7 2.97 0.15
 -16 0 7 3.05 0.15
 16 0 7 2.79 0.13
 -16 0 8 1.74 0.12
 16 0 8 1.75 0.1
 -16 0 8 1.47 0.1
 -16 -1 0 0.12 0.03
 16 1 0 0.12 0.03
 16 1 0 0.14 0.03
 16 -1 0 0.12 0.03
 16 -1 0 0.13 0.03
 16 1 1 1.14 0.06
 -16 1 -1 1.09 0.05
 16 -1 -1 1.21 0.07
 16 1 1 1.08 0.06
 -16 -1 1 1.04 0.06
 16 -1 -1 1.08 0.07
 -16 -1 -1 1.26 0.06
 -16 1 1 1.14 0.07
 -16 -1 -1 1.18 0.05
 16 -1 1 1.04 0.06
 16 -1 1 1.09 0.06
 16 1 -1 1.14 0.06
 -16 1 -2 2.01 0.08
 16 -1 -2 1.96 0.1
 16 -1 -2 2.04 0.1
 -16 -1 2 2.06 0.1
 16 1 2 2.19 0.08
 16 1 2 2.22 0.09
 16 -1 2 2.09 0.09
 -16 1 2 2.08 0.1
 -16 -1 -2 2.11 0.08
 16 -1 2 2.12 0.09
 16 1 -2 2.02 0.1
 -16 -1 -2 2.04 0.08
 -16 1 -3 11.04 0.31
 -16 -1 3 10.47 0.34
 16 -1 -3 10.66 0.34
 16 -1 -3 11.02 0.35
 16 1 3 10.8 0.33
 -16 -1 -3 10.91 0.31
 16 1 -3 11.25 0.35
 16 -1 3 10.8 0.34
 -16 1 3 10.47 0.34
 16 -1 3 11.11 0.32
 -16 1 -4 2.77 0.11
 -16 -1 4 2.9 0.13
 16 -1 -4 3.06 0.14
 16 1 4 2.83 0.12
 -16 1 4 3 0.13
 16 1 -4 3.09 0.13
 -16 -1 -4 2.94 0.12
 16 -1 4 2.89 0.12
 -16 1 -5 0.48 0.05
 16 1 5 0.42 0.05
 -16 -1 5 0.58 0.06
 16 -1 -5 0.45 0.06
 16 1 -5 0.55 0.06
 -16 -1 -5 0.55 0.05
 16 -1 5 0.43 0.05
 -16 1 5 0.5 0.06
 -16 -1 6 1.31 0.09
 -16 1 -6 1.28 0.09
 16 -1 -6 1.21 0.09
 -16 -1 6 1.26 0.09
 16 1 6 1.14 0.08
 16 1 -6 1.27 0.09
 -16 -1 -6 1.31 0.08
 16 -1 6 1.2 0.08
 -16 1 6 1.25 0.09
 -16 1 6 1.27 0.09
 -16 -1 7 2.73 0.14
 -16 -1 7 2.79 0.14
 -16 1 -7 2.64 0.13
 16 1 7 2.5 0.12
 -16 -1 -7 2.79 0.13
 -16 1 7 2.61 0.14
 -16 1 7 2.67 0.14
 16 -1 7 2.83 0.14
 -16 -1 8 1.95 0.12
 -16 -1 8 1.76 0.12
 -16 1 -8 1.87 0.11
 -16 -1 -8 1.95 0.12
 -16 1 8 1.98 0.12
 16 -1 8 1.8 0.11
 -16 1 8 1.88 0.11
 16 -2 0 7.69 0.26
 -16 -2 0 7.97 0.25
 16 2 0 7.96 0.25
 16 -2 0 8.17 0.26
 16 -2 -1 0.11 0.03
 16 2 1 0.12 0.03
 -16 -2 1 0.16 0.03
 -16 2 -1 0.1 0.02
 16 -2 1 0.08 0.03
 16 2 -1 0.11 0.03
 -16 -2 -1 0.12 0.02
 -16 -2 -1 0.08 0.02
 16 -2 1 0.04 0.03
 -16 -2 2 11.72 0.37
 16 2 2 12.28 0.36
 16 -2 -2 13.01 0.38
 -16 2 -2 12.51 0.34
 16 -2 -2 11.95 0.38
 -16 -2 -2 12.86 0.35
 16 -2 2 11.59 0.37
 -16 -2 -2 12.33 0.34
 16 -2 2 12.41 0.36
 -16 2 2 11.93 0.37
 16 2 -2 12.1 0.37
 -16 -2 3 1.82 0.1
 16 -2 -3 1.91 0.1
 16 2 3 2.01 0.09
 16 -2 -3 2.05 0.1
 -16 2 -3 1.83 0.08
 16 2 -3 1.97 0.1
 16 -2 3 1.95 0.09
 -16 2 3 1.99 0.1
 16 -2 3 1.93 0.08
 -16 -2 -3 2 0.08
 16 -2 -4 8.36 0.28
 -16 -2 4 8.28 0.28
 16 2 4 8.76 0.26
 -16 2 -4 8.12 0.26
 16 -2 -4 8.33 0.28
 -16 2 4 8.28 0.28
 16 -2 4 8.24 0.28
 -16 -2 -4 8.35 0.25
 16 2 -4 8.4 0.28
 -16 2 -5 6.46 0.21
 -16 -2 5 6.18 0.23
 16 2 5 6.14 0.21
 16 -2 -5 5.9 0.23
 -16 -2 5 6.31 0.23
 -16 -2 -5 6.2 0.21
 16 -2 5 6.24 0.22
 16 2 -5 6.76 0.23
 -16 2 5 6.12 0.23
 -16 2 -6 5.99 0.22
 16 2 6 5.57 0.21
 -16 -2 6 6.25 0.23
 -16 -2 6 6.45 0.23
 16 -2 -6 6.31 0.24
 -16 2 6 6.45 0.23
 -16 -2 -6 6.5 0.22
 16 -2 6 6.28 0.23
 -16 2 -7 3.06 0.14
 16 -2 -7 2.75 0.15
 -16 -2 7 2.64 0.14
 -16 -2 7 3.16 0.15
 -16 -2 -7 2.73 0.14
 16 -2 7 3.12 0.14
 -16 2 7 2.65 0.14
 -16 2 7 2.84 0.14
 -16 -2 8 5.26 0.21
 -16 -2 8 4.71 0.21
 -16 2 -8 5.18 0.21
 -16 -2 -8 5.26 0.21
 -16 2 8 5.21 0.21
 16 -2 8 4.89 0.21
 -16 2 8 5.15 0.22
 -16 3 0 8.7 0.24
 -16 -3 0 8.7 0.26
 16 3 0 8.69 0.26
 16 -3 0 7.7 0.27
 16 -3 0 9.22 0.28
 16 -3 -1 11.6 0.36
 16 3 1 11.3 0.34
 -16 -3 1 11.44 0.35
 -16 3 -1 11.71 0.32
 16 -3 -1 12.05 0.36
 16 -3 1 12.08 0.35
 16 3 -1 11.29 0.35
 -16 -3 -1 11.7 0.34
 16 -3 1 11.74 0.36
 -16 -3 -1 11.35 0.31
 -16 3 -2 2.16 0.09
 -16 -3 2 2.27 0.1
 16 -3 -2 1.92 0.1
 16 -3 -2 1.84 0.1
 16 3 2 2.25 0.09
 16 -3 2 2.31 0.1
 -16 -3 -2 2.19 0.08
 16 -3 2 2.25 0.1
 16 3 -2 2.43 0.1
 16 -3 -3 3.96 0.17
 16 3 3 4.51 0.15
 16 -3 -3 4.33 0.17
 -16 3 -3 4.46 0.15
 -16 -3 3 4.24 0.17
 16 -3 3 4.49 0.17
 -16 -3 -3 4.52 0.15
 -16 3 3 4.5 0.17
 16 -3 3 4.52 0.16
 16 3 -3 4.55 0.17
 16 -3 -4 1.74 0.1
 16 -3 -4 1.57 0.09
 -16 3 -4 1.56 0.08
 -16 -3 4 1.62 0.09
 16 3 4 1.57 0.07
 16 3 -4 1.44 0.09
 -16 3 4 1.53 0.09
 -16 -3 -4 1.67 0.08
 16 -3 4 1.43 0.09
 16 -3 4 1.49 0.07
 16 -3 -5 4.45 0.18
 -16 -3 5 4.29 0.17
 16 -3 -5 4.32 0.18
 -16 3 -5 4.46 0.16
 -16 -3 5 4.42 0.18
 -16 -3 -5 4.43 0.16
 16 3 -5 4.24 0.18
 -16 3 5 4.09 0.17
 16 -3 5 4.3 0.17
 16 -3 -6 1.17 0.09
 -16 -3 6 1.32 0.09
 -16 3 -6 1.27 0.09
 -16 -3 6 1.15 0.09
 -16 -3 -6 1.12 0.08
 16 -3 6 1.24 0.09
 -16 3 6 1.15 0.09
 -16 -3 7 4.96 0.2
 -16 -3 7 4.87 0.2
 -16 3 -7 4.85 0.19
 16 -3 -7 4.61 0.2
 -16 -3 -7 4.6 0.19
 -16 3 7 4.87 0.2
 -16 3 7 4.78 0.19
 16 -3 7 4.66 0.2
 -16 -3 8 2.03 0.12
 -16 -3 8 2.1 0.12
 -16 3 -8 1.9 0.12
 16 -3 8 2 0.12
 -16 3 8 1.96 0.11
 -16 3 8 2.11 0.13
 -16 -3 -8 2.06 0.12
 16 -4 0 0.23 0.04
 16 -4 0 0.22 0.04
 -16 -4 0 0.21 0.03
 16 4 0 0.27 0.03
 -16 4 0 0.24 0.03
 16 -4 -1 6.54 0.23
 -16 4 -1 6.71 0.2
 16 -4 -1 6.77 0.23
 -16 -4 1 6.38 0.22
 16 4 1 6.6 0.21
 16 4 -1 6.7 0.21
 -16 -4 -1 7.11 0.21
 -16 -4 -1 6.66 0.19
 16 -4 1 6.56 0.22
 16 -4 1 6.72 0.23
 16 -4 -2 6.16 0.23
 -16 4 -2 6.45 0.2
 -16 -4 2 6.24 0.22
 16 -4 -2 6.43 0.23
 16 4 -2 6.51 0.21
 16 -4 2 6.29 0.22
 16 -4 2 6.7 0.22
 -16 -4 -2 6.62 0.19
 16 -4 -3 19.6 0.58
 16 -4 -3 18.32 0.58
 -16 4 -3 19.37 0.53
 -16 -4 3 19.15 0.57
 16 4 -3 20.02 0.57
 -16 -4 -3 19.84 0.52
 16 -4 3 19.02 0.56
 16 -4 3 19.03 0.57
 16 -4 -4 0.89 0.07
 16 -4 -4 0.96 0.08
 -16 -4 4 1 0.07
 -16 4 -4 0.96 0.07
 -16 -4 4 0.93 0.07
 -16 -4 -4 0.98 0.06
 16 4 -4 1.03 0.07
 16 -4 4 0.93 0.07
 16 -4 4 1.06 0.06
 -16 4 4 1.06 0.08
 16 -4 -5 1.9 0.11
 16 -4 -5 1.89 0.11
 -16 -4 5 1.81 0.11
 -16 4 -5 1.73 0.1
 -16 -4 5 1.74 0.1
 -16 4 5 1.84 0.1
 -16 -4 -5 1.7 0.09
 16 -4 5 1.7 0.1
 16 -4 -6 0.16 0.05
 -16 4 -6 0.12 0.05
 -16 -4 6 0.12 0.05
 -16 -4 6 0.23 0.05
 16 -4 6 0.18 0.05
 -16 4 6 0.12 0.05
 -16 -4 -6 0.12 0.05
 -16 -4 7 5.2 0.21
 -16 4 -7 5.39 0.2
 16 -4 -7 5.01 0.21
 -16 -4 7 4.69 0.2
 -16 4 7 4.97 0.2
 -16 4 7 5.28 0.21
 -16 -4 -7 5.19 0.2
 16 -4 7 4.9 0.21
 -16 -4 8 1.16 0.1
 -16 4 -8 1.1 0.09
 -16 -4 8 1.11 0.09
 -16 -4 -8 1.25 0.09
 -16 4 8 1.11 0.09
 -16 4 8 1.12 0.09
 16 -4 8 1.17 0.1
 16 -5 0 15.29 0.48
 16 -5 0 15.06 0.47
 -16 5 0 16.08 0.43
 -16 -5 0 16.79 0.46
 -16 5 -1 2.29 0.09
 16 -5 -1 2.14 0.11
 -16 -5 1 2.04 0.1
 16 -5 -1 2.18 0.11
 16 5 -1 2.23 0.09
 -16 -5 -1 2.33 0.09
 -16 -5 -1 2.19 0.08
 16 -5 1 2.02 0.1
 16 -5 1 1.99 0.1
 -16 -5 2 13.64 0.43
 16 -5 -2 14.52 0.44
 16 -5 -2 13.97 0.44
 -16 5 -2 14.69 0.4
 -16 -5 -2 14.76 0.4
 16 -5 2 14.23 0.44
 16 -5 2 14.91 0.43
 16 5 -2 14.7 0.43
 16 -5 -3 9.17 0.31
 -16 -5 3 9.37 0.3
 16 -5 -3 8.92 0.3
 -16 5 -3 9.4 0.28
 -16 -5 3 9.37 0.29
 -16 -5 -3 8.96 0.27
 16 -5 3 9.23 0.29
 16 5 -3 9.01 0.29
 16 -5 3 8.9 0.3
 16 -5 -4 2.99 0.14
 16 -5 -4 2.94 0.14
 -16 -5 4 2.96 0.14
 -16 -5 4 3.01 0.13
 -16 5 -4 2.97 0.12
 -16 5 4 3.22 0.14
 16 -5 4 2.98 0.12
 16 -5 4 2.99 0.14
 -16 -5 -4 2.97 0.12
 16 -5 -5 0.59 0.07
 -16 -5 5 0.64 0.06
 16 -5 -5 0.63 0.06
 -16 -5 5 0.64 0.06
 -16 5 -5 0.64 0.06
 16 -5 5 0.69 0.07
 -16 -5 -5 0.58 0.06
 -16 5 5 0.67 0.07
 -16 5 -6 0.08 0.05
 -16 -5 6 0.13 0.05
 16 -5 -6 0.17 0.06
 -16 -5 6 0.19 0.05
 16 -5 -6 0.07 0.05
 -16 -5 -6 0.1 0.05
 -16 5 6 0.04 0.02
 16 -5 6 0.09 0.05
 -16 -5 7 0.71 0.08
 -16 5 -7 0.98 0.08
 -16 -5 7 0.87 0.08
 16 -5 -7 0.98 0.09
 -16 5 7 0.83 0.08
 -16 5 7 0.86 0.08
 -16 -5 -7 0.98 0.08
 16 -5 7 0.85 0.08
 -16 -5 8 0.18 0.06
 -16 5 -8 0.17 0.06
 -16 -5 -8 0.2 0.06
 16 -5 8 0.26 0.06
 -16 5 8 0.26 0.06
 -16 6 0 3 0.11
 16 -6 0 2.91 0.13
 16 -6 0 2.93 0.13
 -16 -6 0 3.05 0.12
 16 -6 -1 2.23 0.11
 -16 6 -1 2.34 0.1
 -16 -6 1 2.48 0.11
 16 -6 -1 2.25 0.11
 -16 -6 -1 2.51 0.09
 16 -6 1 2.3 0.11
 16 -6 1 2.08 0.11
 -16 -6 2 0.33 0.05
 -16 6 -2 0.4 0.04
 16 -6 -2 0.39 0.05
 16 -6 -2 0.42 0.05
 16 -6 2 0.4 0.05
 -16 -6 -2 0.42 0.04
 16 -6 2 0.42 0.05
 -16 6 -3 1.36 0.08
 16 -6 -3 1.4 0.09
 -16 -6 3 1.31 0.08
 -16 -6 3 1.33 0.07
 16 -6 -3 1.32 0.09
 -16 -6 -3 1.33 0.07
 16 -6 3 1.42 0.09
 16 -6 3 1.48 0.08
 -16 -6 4 2.87 0.12
 16 -6 -4 3.09 0.14
 -16 6 -4 2.72 0.12
 -16 -6 4 2.98 0.14
 16 -6 -4 2.46 0.13
 -16 -6 -4 2.78 0.12
 16 -6 4 2.87 0.13
 16 -6 4 2.81 0.12
 -16 6 -5 1.5 0.09
 -16 -6 5 1.41 0.1
 16 -6 -5 1.5 0.1
 -16 -6 5 1.32 0.08
 16 -6 -5 1.43 0.1
 -16 -6 -5 1.41 0.09
 16 -6 5 1.4 0.09
 -16 6 5 1.51 0.1
 16 -6 5 1.34 0.08
 -16 -6 6 0.49 0.07
 -16 6 -6 0.59 0.07
 16 -6 -6 0.71 0.07
 16 -6 -6 0.65 0.07
 -16 -6 6 0.47 0.07
 16 -6 6 0.59 0.07
 -16 6 6 0.53 0.07
 -16 -6 -6 0.48 0.06
 -16 6 -7 1.09 0.09
 -16 -6 7 1.5 0.11
 -16 -6 7 1.21 0.09
 16 -6 -7 1.33 0.1
 16 -6 7 1.21 0.1
 -16 6 7 1.28 0.1
 -16 -6 -7 1.3 0.09
 -16 6 7 1.26 0.09
 16 -7 0 1.3 0.08
 -16 -7 0 1.32 0.07
 -16 7 0 1.23 0.07
 16 -7 0 1.34 0.08
 -16 7 -1 4.77 0.16
 16 -7 -1 4.94 0.19
 -16 -7 1 4.39 0.17
 16 -7 -1 4.62 0.18
 -16 -7 -1 4.69 0.15
 16 -7 1 4.72 0.18
 -16 7 1 4.5 0.15
 16 -7 1 4.52 0.18
 -16 -7 2 2.06 0.1
 16 -7 -2 2.07 0.11
 -16 7 -2 2.17 0.1
 16 -7 -2 2.19 0.11
 16 -7 2 1.95 0.1
 16 -7 2 2.14 0.11
 -16 -7 -2 2.01 0.09
 16 -7 -3 9.05 0.31
 -16 -7 3 9.18 0.3
 16 -7 -3 9.43 0.31
 -16 7 -3 8.88 0.28
 16 -7 3 8.88 0.3
 16 -7 3 8.96 0.3
 -16 -7 -3 9.19 0.28
 -16 7 -4 2.37 0.12
 16 -7 -4 2.62 0.13
 -16 -7 4 2.7 0.13
 16 -7 -4 2.47 0.13
 16 -7 4 2.31 0.12
 16 -7 4 2.48 0.13
 -16 -7 -4 2.45 0.11
 -16 -7 5 4.86 0.2
 -16 7 -5 4.67 0.18
 16 -7 -5 4.55 0.19
 -16 -7 5 4.15 0.19
 16 -7 -5 4.9 0.2
 16 -7 5 4.74 0.19
 16 -7 5 4.24 0.18
 -16 -7 -5 4.7 0.18
 -16 7 5 4.88 0.19
 -16 -7 6 2.88 0.15
 16 -7 -6 2.47 0.13
 16 -7 -6 2.55 0.14
 -16 -7 6 2.59 0.13
 -16 7 -6 2.69 0.13
 -16 7 6 2.6 0.13
 -16 -7 -6 2.67 0.13
 16 -7 6 2.88 0.14
 -16 7 -7 1.06 0.09
 -16 -7 7 1.05 0.09
 16 -7 -7 1.16 0.1
 16 -7 -7 1.19 0.09
 -16 -7 7 1.24 0.09
 -16 -7 -7 1.27 0.1
 -16 7 7 1.04 0.09
 -16 7 7 1.16 0.09
 16 -7 7 1.09 0.09
 -16 8 0 0.08 0.03
 16 -8 0 0.07 0.04
 -16 8 -1 4.21 0.15
 -16 -8 1 4.21 0.16
 16 -8 -1 4.2 0.18
 16 -8 -1 4.5 0.17
 16 -8 1 4.09 0.17
 -16 8 1 4.16 0.15
 16 -8 1 4.17 0.17
 16 -8 -2 1.52 0.1
 -16 -8 2 1.47 0.09
 16 -8 -2 1.41 0.09
 -16 8 -2 1.46 0.08
 16 -8 2 1.58 0.1
 16 -8 2 1.62 0.09
 -16 -8 -2 1.43 0.08
 -16 -8 3 10.08 0.33
 16 -8 -3 10.19 0.34
 -16 8 -3 10 0.31
 16 -8 -3 9.47 0.33
 -16 -8 -3 9.54 0.3
 16 -8 3 9.61 0.33
 16 -8 3 9.95 0.33
 -16 -8 4 3.39 0.15
 16 -8 -4 3.14 0.15
 -16 8 -4 3.14 0.14
 16 -8 -4 2.89 0.14
 16 -8 4 3.15 0.14
 16 -8 4 3.12 0.15
 -16 -8 -4 3.22 0.13
 16 -8 -5 1.46 0.1
 16 -8 -5 1.41 0.1
 -16 8 -5 1.53 0.1
 -16 -8 5 1.55 0.1
 16 -8 5 1.59 0.1
 16 -8 5 1.36 0.09
 -16 8 5 1.52 0.1
 -16 -8 -5 1.56 0.09
 -16 8 -6 0.87 0.08
 16 -8 -6 0.7 0.08
 -16 -8 6 0.92 0.09
 16 -8 -6 0.78 0.08
 -16 -8 -6 0.96 0.08
 16 -8 6 0.87 0.08
 -16 8 6 0.9 0.08
 16 -9 0 0.05 0.04
 16 -9 0 0.14 0.04
 -16 9 0 0.14 0.04
 16 -9 -1 2.35 0.12
 -16 9 -1 2.21 0.1
 16 -9 -1 2.28 0.11
 -16 -9 1 1.89 0.1
 -16 9 1 2.05 0.1
 16 -9 1 2.19 0.11
 16 -9 1 2.24 0.12
 -16 9 -2 0.22 0.04
 16 -9 -2 0.28 0.06
 16 -9 -2 0.26 0.05
 -16 -9 2 0.17 0.04
 16 9 2 0.21 0.04
 -16 -9 -2 0.22 0.04
 16 -9 2 0.31 0.05
 16 -9 2 0.29 0.05
 -16 -9 3 5.37 0.2
 -16 9 -3 4.92 0.19
 16 -9 -3 5.2 0.21
 16 -9 -3 4.85 0.2
 16 -9 3 5.32 0.2
 -16 -9 -3 4.99 0.18
 16 -9 3 5.41 0.21
 -16 -9 4 0.6 0.07
 16 -9 -4 0.66 0.07
 -16 9 -4 0.61 0.07
 16 -9 -4 0.55 0.07
 16 -9 4 0.69 0.07
 -16 -9 -4 0.5 0.06
 16 -9 4 0.6 0.07
 16 -9 -5 0.94 0.09
 -16 9 -5 0.89 0.08
 -16 -9 5 0.93 0.09
 16 -9 -5 0.83 0.08
 -16 -9 -5 0.98 0.08
 16 -9 5 1.08 0.08
 16 -9 5 0.8 0.08
 -16 9 -6 0.09 0.05
 16 -9 -6 0.08 0.05
 -16 -9 6 0.03 0.02
 16 -9 6 0.01 0.02
 -16 9 6 0 0.02
 -16 -9 -6 0.12 0.05
 16 -10 0 2.08 0.11
 -16 10 0 2.05 0.1
 16 -10 0 2.23 0.12
 -16 10 -1 3.33 0.14
 16 -10 -1 3.54 0.16
 -16 -10 1 3.13 0.14
 16 -10 -1 3.35 0.15
 -16 10 1 3.07 0.13
 16 -10 1 3.27 0.14
 16 -10 1 3.45 0.16
 16 10 2 0.02 0.01
 -16 -10 2 0.06 0.04
 -16 10 -2 0.09 0.04
 16 -10 -2 0.13 0.05
 16 -10 -2 0.09 0.04
 16 -10 2 0.08 0.05
 16 -10 2 0.02 0.01
 -16 10 -3 2.49 0.12
 16 -10 -3 2.64 0.14
 16 -10 -3 2.58 0.13
 16 10 3 2.53 0.12
 -16 -10 3 2.63 0.13
 16 -10 3 2.77 0.13
 -16 -10 -3 2.6 0.12
 16 -10 3 2.72 0.14
 16 -10 -4 1.55 0.11
 -16 -10 4 1.53 0.1
 -16 10 -4 1.6 0.1
 16 -10 4 1.6 0.1
 16 -10 4 1.64 0.11
 -16 -10 -4 1.68 0.1
 -16 -10 5 1.31 0.1
 16 -10 -5 1.31 0.1
 -16 10 -5 1.36 0.1
 16 -10 5 1.42 0.1
 -16 -10 -5 1.38 0.09
 16 -10 5 1.47 0.1
 16 -11 0 0 0.01
 16 -11 0 0.08 0.04
 -16 11 0 -0.02 0.01
 16 -11 -1 3.28 0.15
 16 -11 -1 3.39 0.16
 -16 11 -1 3.59 0.15
 -16 11 1 3 0.13
 16 -11 1 3.2 0.15
 16 -11 1 3.36 0.16
 -16 11 -2 2.67 0.13
 16 -11 -2 2.53 0.14
 -16 -11 2 2.58 0.13
 16 -11 2 2.49 0.13
 16 -11 2 2.56 0.14
 -16 11 -3 4.04 0.17
 16 -11 -3 4.21 0.19
 -16 -11 3 4.58 0.19
 16 11 3 4.18 0.17
 16 -11 3 4.54 0.18
 -16 -11 -3 4.24 0.17
 16 -11 3 4.69 0.19
 -16 11 -4 1.2 0.09
 -16 -11 4 1.08 0.09
 16 11 4 1.16 0.08
 16 -11 -4 1.22 0.1
 -16 -11 -4 1.25 0.09
 16 -11 4 1.15 0.09
 16 -11 4 1.18 0.09
 -16 12 0 3.48 0.15
 16 -12 0 3.37 0.17
 -16 12 -1 5.03 0.19
 16 -12 -1 5.16 0.22
 16 -12 1 5.07 0.2
 16 -12 1 5.03 0.21
 -16 12 1 5.06 0.19
 -16 12 -2 0.37 0.06
 16 -12 -2 0.42 0.07
 16 -12 2 0.47 0.07
 16 -12 2 0.48 0.06
 -16 -12 3 0.83 0.08
 -16 12 -3 0.75 0.08
 16 12 3 0.67 0.07
 16 -12 -3 0.69 0.08
 16 -12 3 0.74 0.08
 16 -12 3 0.88 0.08
 -16 13 0 0.52 0.07
 17 0 1 0.09 0.03
 17 0 -1 0.08 0.03
 -17 0 -1 0.04 0.02
 17 0 -1 0.06 0.03
 17 0 -2 0 0.01
 -17 0 -2 0 0.01
 17 0 -2 0 0.01
 17 0 2 0.04 0.03
 -17 0 2 0.04 0.03
 17 0 2 0 0.01
 -17 0 3 -0.02 0.01
 -17 0 -3 0.01 0.01
 17 0 3 0.01 0.01
 17 0 -3 0.05 0.04
 17 0 -4 0 0.01
 -17 0 -4 -0.01 0.01
 -17 0 4 0 0.02
 17 0 4 0 0.01
 17 0 5 0 0.01
 17 0 -5 0 0.01
 -17 0 -5 -0.02 0.01
 -17 0 5 0.01 0.02
 -17 0 -6 0.01 0.02
 -17 0 6 -0.01 0.02
 17 0 6 -0.01 0.01
 17 0 -6 0.01 0.01
 -17 0 6 0.01 0.01
 -17 0 7 0.02 0.02
 -17 0 7 0.01 0.01
 -17 0 -7 0 0.02
 17 0 7 0 0.01
 -17 0 -8 -0.01 0.02
 -17 0 8 -0.02 0.02
 -17 0 8 0.01 0.02
 17 0 8 0.01 0.01
 -17 -1 0 17.89 0.51
 17 -1 0 17.54 0.51
 17 1 0 18.3 0.52
 17 -1 0 17.49 0.52
 17 1 0 17.18 0.51
 -17 1 -1 13.09 0.34
 17 1 1 12.77 0.38
 17 1 1 12.87 0.37
 17 -1 -1 11.68 0.38
 17 -1 -1 12.79 0.38
 -17 -1 1 12.3 0.38
 -17 1 1 12.46 0.38
 -17 -1 -1 12.64 0.37
 17 1 -1 12.93 0.38
 17 -1 1 12.41 0.38
 17 -1 1 12.23 0.37
 17 -1 -2 22.35 0.66
 -17 -1 2 22.19 0.66
 17 -1 -2 22.23 0.67
 -17 1 -2 23.32 0.6
 17 1 2 23.49 0.64
 17 1 2 22.06 0.65
 17 -1 2 23.33 0.64
 -17 -1 -2 24.05 0.64
 -17 -1 -2 23.15 0.6
 17 1 -2 23.55 0.67
 17 -1 2 23.19 0.66
 -17 1 2 21.85 0.66
 -17 1 -3 6.75 0.21
 17 1 3 7.26 0.23
 17 -1 -3 7.23 0.25
 -17 -1 3 6.75 0.24
 17 -1 -3 7.02 0.24
 17 -1 3 7.22 0.22
 17 1 -3 7.1 0.24
 -17 -1 -3 7.19 0.21
 17 -1 3 6.82 0.23
 -17 1 3 6.53 0.24
 17 1 4 20.29 0.59
 -17 1 -4 20.45 0.55
 -17 -1 4 20.5 0.6
 17 -1 -4 19.43 0.61
 17 -1 4 20.58 0.6
 -17 1 4 20.16 0.6
 17 1 -4 20.66 0.61
 -17 -1 -4 20.11 0.55
 -17 1 -5 6.1 0.21
 17 1 5 6.3 0.22
 17 -1 -5 6.07 0.23
 -17 -1 5 6.66 0.23
 -17 -1 -5 6.05 0.21
 -17 1 5 6.39 0.23
 17 1 -5 6.58 0.24
 17 -1 5 6.27 0.22
 17 -1 -6 5.26 0.21
 -17 -1 6 5.41 0.21
 -17 -1 6 5.6 0.21
 -17 1 -6 5.45 0.2
 17 1 6 4.95 0.19
 -17 1 6 5.45 0.21
 17 1 -6 5.01 0.21
 17 -1 6 5.29 0.2
 -17 -1 -6 5.34 0.19
 17 1 7 2.4 0.12
 17 -1 -7 2.7 0.14
 -17 -1 7 2.57 0.14
 -17 1 -7 2.56 0.13
 -17 -1 7 2.38 0.13
 -17 1 7 2.69 0.14
 -17 1 7 2.72 0.14
 17 -1 7 2.71 0.13
 -17 -1 -7 2.51 0.13
 -17 1 -8 1.94 0.12
 -17 -1 8 1.91 0.12
 -17 -1 8 1.85 0.12
 -17 1 8 1.82 0.11
 -17 -1 -8 1.91 0.11
 -17 1 8 1.81 0.12
 17 -1 8 1.82 0.11
 -17 -2 0 3.17 0.12
 17 -2 0 3.2 0.13
 17 2 0 3.17 0.12
 17 -2 0 3.07 0.13
 17 2 1 17.9 0.51
 -17 -2 1 17.03 0.51
 17 -2 -1 17.28 0.52
 -17 2 -1 17.83 0.46
 17 -2 -1 16.89 0.52
 17 2 -1 17.36 0.51
 17 -2 1 17.82 0.51
 -17 -2 -1 17.79 0.5
 17 -2 1 17.21 0.52
 -17 2 -2 2.3 0.09
 -17 -2 2 2.11 0.1
 17 2 2 2.4 0.09
 17 -2 -2 2.12 0.11
 17 -2 -2 2.27 0.11
 -17 2 2 2.21 0.11
 -17 -2 -2 2.25 0.09
 17 -2 2 2.32 0.1
 17 2 -2 2.35 0.1
 17 -2 2 2.46 0.1
 17 2 3 22.98 0.64
 -17 -2 3 22.27 0.65
 17 -2 -3 21.46 0.65
 -17 2 -3 22.19 0.6
 17 -2 -3 22.93 0.66
 -17 2 3 21.06 0.65
 -17 -2 -3 23.09 0.6
 17 -2 3 22.95 0.63
 17 -2 3 22.26 0.65
 17 2 -3 22.1 0.65
 -17 2 -4 2.1 0.1
 17 2 4 2.31 0.1
 -17 -2 4 2.21 0.11
 17 -2 -4 2.13 0.11
 17 -2 -4 2.29 0.12
 17 2 -4 2.41 0.12
 17 -2 4 2.4 0.11
 -17 2 4 2.16 0.11
 -17 -2 -4 1.98 0.1
 -17 2 -5 9.97 0.31
 -17 -2 5 10.12 0.33
 -17 -2 5 9.79 0.33
 17 -2 -5 10.08 0.34
 17 2 5 10.15 0.31
 17 -2 5 10.32 0.33
 -17 -2 -5 9.52 0.3
 -17 2 5 9.94 0.33
 17 2 -5 10.15 0.34
 -17 -2 6 2 0.11
 17 -2 -6 1.91 0.12
 -17 2 -6 2.02 0.11
 -17 -2 6 1.81 0.11
 17 -2 6 2 0.11
 -17 -2 -6 1.66 0.1
 -17 2 6 2.08 0.11
 -17 2 -7 6.96 0.25
 -17 -2 7 7 0.26
 -17 -2 7 7.12 0.26
 17 -2 -7 6.56 0.26
 -17 2 7 7.04 0.26
 17 -2 7 6.75 0.25
 -17 -2 -7 6.63 0.24
 -17 2 7 7.26 0.27
 -17 2 -8 0.2 0.06
 -17 -2 8 0.2 0.06
 -17 -2 8 0.25 0.06
 -17 2 8 0.21 0.06
 17 -2 8 0.24 0.06
 -17 2 8 0.23 0.06
 -17 -2 -8 0.13 0.06
 -17 -3 0 33.48 0.93
 17 3 0 33.81 0.95
 17 -3 0 34.43 0.95
 17 -3 0 33.77 0.96
 -17 3 -1 36.79 0.92
 17 -3 -1 36.55 1.01
 -17 -3 1 35.27 1
 17 3 1 37 1
 17 -3 -1 34.14 1.02
 -17 -3 -1 37.08 0.98
 17 3 -1 35.08 1.01
 17 -3 1 35.57 1
 17 -3 1 35.91 1.02
 17 3 2 16.52 0.47
 -17 -3 2 16.07 0.48
 17 -3 -2 16.23 0.49
 -17 3 -2 16.42 0.44
 17 -3 -2 15.58 0.49
 17 -3 2 15.8 0.47
 -17 -3 -2 16.58 0.43
 17 3 -2 16.19 0.48
 17 -3 2 15.93 0.49
 17 -3 -3 0.6 0.06
 17 -3 -3 0.61 0.06
 17 3 3 0.59 0.04
 -17 -3 3 0.55 0.05
 -17 3 -3 0.63 0.05
 -17 3 3 0.57 0.06
 17 3 -3 0.68 0.06
 17 -3 3 0.59 0.05
 -17 -3 -3 0.63 0.05
 17 -3 3 0.61 0.06
 17 -3 -4 2.66 0.13
 -17 -3 4 2.72 0.13
 17 -3 -4 2.61 0.13
 -17 3 -4 2.54 0.11
 -17 -3 -4 2.59 0.11
 17 -3 4 2.67 0.12
 -17 3 4 2.66 0.13
 17 3 -4 2.61 0.12
 17 -3 -5 9.41 0.32
 -17 -3 5 9.17 0.31
 -17 -3 5 8.94 0.31
 17 -3 -5 9.46 0.32
 -17 3 -5 8.89 0.29
 17 -3 5 9.63 0.31
 17 3 -5 9.62 0.32
 -17 -3 -5 9 0.29
 -17 3 5 9.22 0.31
 -17 3 -6 2.24 0.12
 17 -3 -6 2.12 0.13
 -17 -3 6 2.54 0.13
 -17 -3 6 2.45 0.13
 17 -3 6 2.69 0.13
 -17 -3 -6 1.96 0.11
 -17 3 6 2.32 0.12
 -17 -3 7 3.67 0.17
 -17 3 -7 3.78 0.16
 -17 -3 7 3.75 0.17
 17 -3 -7 3.86 0.18
 -17 3 7 4.01 0.18
 17 -3 7 3.77 0.17
 -17 3 7 3.73 0.17
 -17 -3 -7 3.56 0.16
 -17 3 -8 0.8 0.08
 -17 -3 8 0.83 0.08
 -17 -3 8 0.8 0.08
 17 -3 8 0.84 0.08
 -17 3 8 0.87 0.09
 -17 -3 -8 0.87 0.08
 -17 3 8 0.82 0.08
 -17 -4 0 15.65 0.45
 17 -4 0 15.42 0.47
 17 -4 0 15.21 0.46
 17 4 0 15.52 0.45
 -17 4 -1 6.39 0.19
 -17 -4 1 6.01 0.21
 17 -4 -1 6.08 0.22
 17 4 1 6.1 0.19
 17 -4 -1 6.1 0.22
 17 4 -1 6.35 0.2
 17 -4 1 5.69 0.21
 -17 -4 -1 6.23 0.19
 17 -4 1 5.81 0.21
 -17 4 -2 19.58 0.52
 17 -4 -2 19.15 0.58
 -17 -4 2 19.35 0.57
 17 -4 -2 19.62 0.58
 -17 -4 -2 19.48 0.52
 17 -4 2 19.67 0.56
 17 -4 2 19.1 0.58
 17 4 -2 19.52 0.57
 17 -4 -3 1.6 0.09
 -17 4 -3 1.57 0.08
 -17 -4 3 1.57 0.09
 17 -4 -3 1.61 0.09
 17 -4 3 1.54 0.09
 17 -4 3 1.42 0.08
 17 4 -3 1.42 0.08
 -17 -4 -3 1.69 0.08
 17 -4 -4 7.32 0.26
 -17 -4 4 7.33 0.25
 -17 4 -4 6.96 0.23
 -17 -4 4 7.28 0.25
 17 -4 -4 6.92 0.26
 -17 4 4 7.4 0.26
 -17 -4 -4 6.89 0.23
 17 -4 4 7.2 0.24
 17 -4 4 7.8 0.26
 17 4 -4 7.27 0.25
 -17 -4 5 1.88 0.11
 -17 -4 5 1.81 0.1
 -17 4 -5 1.94 0.1
 17 -4 -5 1.88 0.11
 17 -4 -5 1.84 0.11
 -17 -4 -5 1.78 0.09
 -17 4 5 1.99 0.11
 17 -4 5 1.85 0.11
 -17 -4 6 0.95 0.08
 -17 4 -6 0.85 0.08
 -17 -4 6 0.81 0.08
 17 -4 -6 0.86 0.08
 -17 4 6 1.03 0.08
 17 -4 6 0.85 0.08
 -17 -4 -6 1.04 0.08
 -17 4 -7 2.2 0.12
 -17 -4 7 2.22 0.13
 17 -4 -7 2.24 0.13
 -17 -4 7 2.23 0.13
 -17 4 7 2.27 0.13
 -17 -4 -7 2.41 0.12
 17 -4 7 2.21 0.13
 -17 4 7 2.26 0.12
 -17 -4 8 0.74 0.08
 -17 -4 8 0.67 0.08
 -17 4 -8 0.75 0.08
 -17 4 8 0.77 0.08
 17 -4 8 0.87 0.09
 -17 4 8 0.83 0.08
 -17 -4 -8 0.69 0.08
 17 -5 0 1.57 0.09
 17 -5 0 1.67 0.09
 -17 -5 0 1.73 0.08
 -17 5 -1 3.09 0.11
 17 -5 -1 2.96 0.13
 17 -5 -1 2.73 0.12
 -17 -5 1 2.79 0.12
 17 -5 1 2.64 0.12
 17 5 -1 2.92 0.11
 17 -5 1 2.61 0.12
 17 -5 -2 1.42 0.09
 -17 -5 2 1.57 0.09
 -17 5 -2 1.5 0.07
 17 -5 -2 1.54 0.09
 17 5 -2 1.56 0.08
 -17 -5 -2 1.54 0.07
 17 -5 2 1.61 0.09
 17 -5 2 1.6 0.09
 17 -5 -3 4.65 0.18
 -17 -5 3 4.56 0.16
 -17 -5 3 4.41 0.17
 17 -5 -3 4.47 0.18
 -17 5 -3 4.25 0.16
 17 -5 3 4.42 0.17
 17 -5 3 4.37 0.17
 -17 -5 -3 4.55 0.15
 17 5 -3 4.47 0.17
 -17 -5 4 3.23 0.14
 -17 5 -4 3.21 0.13
 17 -5 -4 3.2 0.15
 17 -5 -4 3.4 0.15
 -17 -5 4 3.2 0.15
 17 -5 4 3.44 0.15
 -17 -5 -4 3.11 0.13
 17 -5 4 3.02 0.13
 -17 5 4 3.46 0.15
 17 -5 -5 2.48 0.13
 -17 -5 5 2.32 0.12
 -17 5 -5 2.44 0.12
 17 -5 -5 2.57 0.13
 -17 -5 5 2.13 0.11
 17 -5 5 2.43 0.13
 -17 5 5 2.41 0.12
 -17 -5 -5 2.41 0.11
 -17 -5 6 0.2 0.05
 -17 -5 6 0.06 0.04
 17 -5 -6 0.19 0.06
 17 -5 -6 0.18 0.06
 -17 5 -6 0.1 0.05
 -17 5 6 0.16 0.05
 17 -5 6 0.15 0.05
 -17 -5 -6 0.13 0.05
 17 -5 -7 2.03 0.12
 -17 -5 7 2.11 0.13
 -17 -5 7 2.14 0.12
 -17 5 -7 1.9 0.12
 -17 5 7 1.8 0.12
 -17 5 7 1.84 0.11
 17 -5 7 2.33 0.13
 -17 -5 -7 2.06 0.12
 17 -6 0 0.2 0.04
 -17 -6 0 0.16 0.03
 17 -6 0 0.15 0.04
 -17 6 0 0.17 0.03
 17 -6 -1 22.67 0.66
 -17 6 -1 22.53 0.6
 -17 -6 1 22.25 0.64
 17 -6 -1 22.5 0.66
 17 -6 1 22.62 0.65
 17 -6 1 21.94 0.66
 17 -6 -2 1.45 0.09
 -17 6 -2 1.29 0.07
 -17 -6 2 1.21 0.08
 17 -6 -2 1.38 0.09
 17 -6 2 1.24 0.08
 17 -6 2 1.29 0.08
 -17 -6 -2 1.25 0.06
 -17 6 -3 0.25 0.04
 17 -6 -3 0.27 0.05
 17 -6 -3 0.25 0.05
 -17 -6 3 0.22 0.05
 17 -6 3 0.27 0.05
 -17 -6 -3 0.18 0.04
 17 -6 3 0.24 0.05
 17 -6 -4 6.93 0.26
 -17 -6 4 7.45 0.26
 17 -6 -4 7.14 0.26
 -17 6 -4 7.27 0.24
 -17 -6 4 7.12 0.24
 17 -6 4 6.79 0.24
 -17 -6 -4 7.04 0.23
 17 -6 4 7.3 0.26
 -17 -6 5 1.86 0.1
 17 -6 -5 2.13 0.12
 17 -6 -5 2.4 0.13
 -17 6 -5 2.33 0.11
 -17 -6 5 1.99 0.12
 -17 6 5 1.89 0.11
 17 -6 5 2.1 0.12
 -17 -6 -5 2.24 0.11
 -17 -6 6 4.51 0.19
 -17 6 -6 4.4 0.18
 -17 -6 6 4.2 0.18
 17 -6 -6 4.42 0.19
 17 -6 -6 4.63 0.19
 -17 6 6 4.49 0.19
 17 -6 6 4.37 0.19
 -17 -6 -6 4.18 0.17
 -17 -6 7 4.45 0.19
 -17 -6 7 4.65 0.2
 -17 6 -7 4.77 0.19
 17 -6 -7 4.57 0.2
 -17 6 7 4.73 0.2
 -17 -6 -7 4.42 0.18
 17 -6 7 4.41 0.2
 -17 6 7 4.61 0.19
 -17 -7 0 1.43 0.08
 17 -7 0 1.46 0.09
 -17 7 0 1.38 0.07
 17 -7 0 1.47 0.09
 -17 -7 1 2.83 0.12
 -17 7 -1 2.96 0.11
 17 -7 -1 2.8 0.14
 17 -7 -1 2.79 0.13
 17 -7 1 3 0.13
 17 -7 1 2.85 0.13
 17 -7 -2 0.34 0.06
 -17 -7 2 0.41 0.05
 17 -7 -2 0.46 0.06
 -17 7 -2 0.36 0.05
 17 -7 2 0.34 0.05
 17 -7 2 0.36 0.05
 -17 -7 -2 0.36 0.04
 -17 -7 3 0.4 0.06
 17 -7 -3 0.37 0.05
 -17 7 -3 0.31 0.05
 17 -7 -3 0.29 0.05
 17 -7 3 0.37 0.05
 17 -7 3 0.34 0.05
 -17 -7 -3 0.32 0.04
 -17 -7 4 0.3 0.06
 17 -7 -4 0.43 0.06
 17 -7 -4 0.24 0.05
 -17 7 -4 0.36 0.05
 17 -7 4 0.33 0.05
 -17 -7 -4 0.28 0.05
 17 -7 4 0.31 0.05
 -17 7 -5 0.01 0.02
 17 -7 -5 0.02 0.02
 -17 -7 5 0.02 0.02
 17 -7 -5 0.01 0.02
 17 -7 5 0.08 0.05
 17 -7 5 0.11 0.04
 -17 -7 -5 0.07 0.04
 -17 7 5 0.02 0.02
 17 -7 -6 0.49 0.07
 17 -7 -6 0.56 0.07
 -17 7 -6 0.55 0.07
 -17 -7 6 0.56 0.07
 -17 -7 6 0.51 0.07
 -17 7 6 0.55 0.07
 -17 -7 -6 0.52 0.06
 17 -7 6 0.42 0.07
 -17 -7 7 0.59 0.07
 -17 7 -7 0.7 0.08
 17 -7 -7 0.7 0.08
 -17 7 7 0.74 0.08
 -17 7 7 0.66 0.07
 -17 -7 -7 0.64 0.07
 17 -7 7 0.61 0.08
 -17 8 0 0.24 0.04
 17 -8 0 0.26 0.05
 17 -8 0 0.25 0.05
 17 -8 -1 1.8 0.1
 17 -8 -1 1.89 0.1
 -17 -8 1 1.63 0.09
 -17 8 -1 1.7 0.09
 17 -8 1 1.81 0.1
 17 -8 1 1.67 0.1
 -17 8 -2 0.34 0.05
 17 -8 -2 0.37 0.05
 17 -8 -2 0.41 0.06
 -17 -8 2 0.48 0.06
 17 -8 2 0.43 0.06
 -17 -8 -2 0.43 0.04
 17 -8 2 0.47 0.06
 17 -8 -3 0.28 0.05
 17 -8 -3 0.33 0.06
 -17 8 -3 0.25 0.05
 -17 -8 3 0.24 0.05
 17 -8 3 0.2 0.05
 -17 -8 -3 0.29 0.04
 17 -8 3 0.26 0.05
 -17 -8 4 0.1 0.05
 -17 8 -4 0.03 0.02
 17 -8 -4 0.12 0.05
 17 -8 -4 0.1 0.05
 17 -8 4 0.09 0.04
 17 -8 4 0.07 0.05
 -17 -8 -4 0.09 0.04
 -17 -8 5 2.75 0.14
 17 -8 -5 2.72 0.14
 -17 8 -5 2.74 0.13
 17 -8 -5 2.66 0.14
 17 -8 5 2.7 0.13
 -17 8 5 2.57 0.13
 17 -8 5 2.73 0.14
 -17 -8 -5 2.88 0.13
 17 -8 -6 0.1 0.05
 -17 8 -6 0.01 0.02
 -17 -8 6 0.03 0.02
 17 -8 -6 0.03 0.02
 17 -8 6 0.12 0.05
 -17 -8 -6 0.08 0.05
 -17 8 6 0.09 0.05
 17 -9 0 4 0.16
 17 -9 0 3.9 0.17
 -17 9 0 3.61 0.14
 17 -9 -1 9.27 0.31
 17 -9 -1 9.54 0.32
 -17 -9 1 8.73 0.29
 -17 9 -1 8.55 0.28
 17 -9 1 9.28 0.31
 17 -9 1 8.98 0.31
 17 -9 -2 1.14 0.08
 17 -9 -2 1.09 0.09
 -17 -9 2 1.1 0.08
 -17 9 -2 1.09 0.08
 17 -9 2 1.3 0.09
 17 -9 2 1.44 0.09
 17 -9 -3 0.82 0.08
 17 -9 -3 0.69 0.07
 -17 -9 3 0.78 0.07
 -17 9 -3 0.76 0.07
 -17 -9 -3 0.79 0.06
 17 -9 3 0.7 0.07
 17 -9 3 0.8 0.07
 17 -9 -4 0.13 0.05
 -17 -9 4 0.14 0.05
 17 -9 -4 0.1 0.05
 -17 9 -4 0.24 0.05
 -17 -9 -4 0.18 0.05
 17 -9 4 0.14 0.05
 17 -9 4 0.24 0.05
 -17 -9 5 2.47 0.14
 17 -9 -5 2.45 0.13
 -17 9 -5 2.83 0.14
 17 -9 -5 2.68 0.14
 -17 -9 -5 2.59 0.13
 17 -9 5 2.35 0.13
 17 -9 5 2.38 0.13
 17 -10 0 0.16 0.05
 -17 10 0 0.11 0.04
 17 -10 0 0.08 0.05
 -17 10 -1 3.1 0.13
 17 -10 -1 3.15 0.14
 17 -10 -1 3.29 0.16
 17 -10 1 3.37 0.16
 17 -10 1 3.07 0.14
 17 -10 -2 0.2 0.06
 17 -10 -2 0.22 0.05
 -17 10 -2 0.15 0.05
 -17 -10 2 0.23 0.05
 17 -10 2 0.21 0.05
 17 -10 2 0.25 0.05
 17 -10 -3 1.5 0.1
 -17 -10 3 1.47 0.1
 17 10 3 1.37 0.09
 17 -10 -3 1.63 0.11
 -17 10 -3 1.65 0.1
 -17 -10 -3 1.58 0.09
 17 -10 3 1.36 0.1
 17 -10 3 1.48 0.1
 17 -10 -4 0.74 0.08
 -17 10 -4 0.97 0.08
 -17 -10 4 0.8 0.08
 -17 -10 -4 0.86 0.07
 17 -10 4 0.75 0.08
 17 -10 4 0.86 0.08
 -17 10 -5 6.83 0.25
 -17 -10 5 6.43 0.26
 17 -10 -5 6.67 0.26
 -17 -10 -5 6.9 0.24
 17 -10 5 6.43 0.25
 17 -10 5 6.87 0.26
 -17 11 0 0.27 0.05
 17 -11 0 0.23 0.05
 17 -11 0 0.42 0.07
 17 -11 -1 -0.01 0.02
 17 -11 -1 0.08 0.04
 -17 11 -1 0.08 0.05
 17 -11 1 -0.01 0.02
 17 -11 1 0.01 0.01
 -17 -11 2 1.92 0.11
 17 -11 -2 1.78 0.12
 -17 11 -2 1.92 0.11
 17 -11 2 1.76 0.11
 17 -11 2 2.02 0.11
 17 -11 -3 1.28 0.1
 -17 -11 3 1.22 0.09
 -17 11 -3 1.19 0.09
 17 -11 3 1.28 0.09
 17 -11 3 1.24 0.1
 -17 11 -4 1.15 0.09
 -17 -11 4 1.17 0.09
 17 11 4 1.06 0.08
 17 -11 -4 1.05 0.09
 -17 -11 -4 1.15 0.08
 17 -11 4 0.88 0.09
 17 -11 4 1.13 0.09
 -17 12 0 0.81 0.07
 17 -12 0 0.9 0.09
 -17 12 -1 2.17 0.11
 17 -12 -1 1.87 0.12
 17 -12 1 1.91 0.11
 17 -12 1 1.89 0.12
 -17 12 -2 0.94 0.08
 17 -12 -2 0.98 0.09
 17 -12 2 0.96 0.09
 17 -12 2 1.14 0.08
 18 0 0 27.31 0.77
 -18 0 0 26.47 0.77
 18 0 0 28.22 0.78
 -18 0 -1 17.07 0.48
 18 0 -1 16.18 0.49
 18 0 1 16.89 0.49
 18 0 -1 16.29 0.49
 18 0 1 16.33 0.48
 -18 0 1 16.5 0.49
 18 0 -2 22 0.67
 -18 0 2 22.92 0.67
 18 0 2 23.75 0.65
 18 0 -2 22.69 0.68
 18 0 2 23.7 0.67
 -18 0 -2 24.03 0.65
 -18 0 -2 23.42 0.61
 18 0 3 29.3 0.81
 -18 0 -3 28.57 0.75
 -18 0 3 27.33 0.81
 18 0 -3 28 0.82
 -18 0 4 4.75 0.19
 18 0 4 4.77 0.18
 -18 0 -4 4.98 0.17
 18 0 -4 4.97 0.19
 18 0 5 2.81 0.12
 -18 0 5 2.86 0.14
 -18 0 -5 2.74 0.12
 18 0 -5 2.87 0.14
 -18 0 -6 7.68 0.26
 18 0 -6 8.01 0.29
 -18 0 6 7.75 0.28
 18 0 6 7.53 0.27
 -18 0 6 8.27 0.28
 -18 0 7 4.49 0.2
 18 0 7 4.43 0.18
 -18 0 -7 4.66 0.18
 -18 0 7 4.71 0.2
 -18 0 8 0.3 0.06
 -18 0 -8 0.29 0.06
 18 0 8 0.47 0.06
 -18 0 8 0.44 0.07
 18 -1 0 1.22 0.07
 -18 1 0 1.22 0.07
 18 1 0 1.21 0.07
 18 -1 0 1.19 0.07
 -18 -1 0 1.32 0.07
 18 1 0 1.24 0.07
 18 -1 -1 10.78 0.33
 -18 -1 1 9.96 0.32
 18 1 1 10.58 0.31
 18 1 1 9.89 0.32
 18 -1 -1 10.51 0.33
 -18 -1 -1 10.73 0.31
 18 -1 1 10.42 0.32
 18 -1 1 9.79 0.31
 18 1 -1 9.87 0.32
 -18 1 1 9.8 0.32
 18 -1 -2 0.42 0.05
 -18 -1 2 0.46 0.05
 18 1 2 0.47 0.04
 18 1 2 0.52 0.04
 -18 1 -2 0.47 0.04
 18 -1 -2 0.46 0.05
 18 -1 2 0.44 0.05
 -18 -1 -2 0.46 0.04
 18 -1 2 0.47 0.04
 -18 -1 -2 0.39 0.04
 18 1 -2 0.41 0.05
 -18 1 2 0.47 0.05
 18 -1 -3 14.03 0.44
 18 -1 -3 13.66 0.44
 18 1 3 13.98 0.42
 -18 -1 3 13.63 0.43
 -18 1 -3 14.53 0.39
 -18 1 3 13.8 0.43
 18 1 -3 14.12 0.44
 18 -1 3 14.53 0.43
 -18 -1 -3 14.44 0.39
 -18 1 -4 1.99 0.09
 -18 -1 4 1.9 0.11
 18 1 4 1.87 0.09
 18 -1 -4 1.99 0.11
 18 1 -4 2.07 0.11
 18 -1 4 2.14 0.1
 -18 -1 -4 2.02 0.09
 -18 1 4 1.92 0.11
 -18 1 -5 2.42 0.11
 -18 -1 5 2.59 0.13
 18 1 5 2.35 0.11
 18 -1 -5 2.62 0.13
 -18 1 5 2.79 0.13
 18 -1 5 2.48 0.12
 -18 -1 -5 2.33 0.11
 18 1 -5 2.72 0.13
 18 1 6 2.9 0.13
 -18 1 -6 3.39 0.14
 -18 -1 6 3.52 0.16
 18 -1 -6 3.4 0.16
 -18 -1 6 3.11 0.15
 18 -1 6 3.07 0.14
 -18 -1 -6 3.36 0.14
 -18 1 6 3.55 0.16
 18 1 -6 3.48 0.16
 18 -1 -7 1.73 0.12
 -18 -1 7 1.69 0.11
 -18 -1 7 1.58 0.11
 -18 1 -7 1.73 0.1
 -18 -1 -7 1.6 0.1
 18 -1 7 1.6 0.1
 -18 1 7 1.52 0.11
 -18 1 7 1.53 0.11
 -18 1 -8 0.42 0.07
 -18 -1 8 0.44 0.07
 -18 -1 8 0.4 0.07
 -18 1 8 0.48 0.07
 -18 -1 -8 0.44 0.07
 18 -1 8 0.52 0.07
 -18 1 8 0.45 0.07
 -18 -2 0 16.45 0.47
 18 -2 0 15.54 0.48
 18 2 0 16.46 0.48
 18 -2 0 16.2 0.48
 18 -2 -1 0.29 0.05
 18 2 1 0.36 0.04
 18 -2 -1 0.35 0.05
 -18 -2 1 0.38 0.04
 18 -2 1 0.3 0.04
 18 -2 1 0.33 0.04
 18 2 -1 0.32 0.04
 -18 -2 -1 0.36 0.04
 -18 -2 2 8.13 0.27
 18 -2 -2 8.21 0.28
 18 -2 -2 8.04 0.28
 -18 2 -2 8.23 0.24
 18 2 2 8.4 0.26
 18 -2 2 8.22 0.27
 18 -2 2 8.49 0.26
 18 2 -2 8.48 0.27
 -18 -2 -2 8.18 0.24
 -18 2 2 8.06 0.27
 18 2 3 4.51 0.16
 -18 -2 3 4.34 0.17
 18 -2 -3 4.52 0.18
 18 -2 -3 4.3 0.18
 -18 2 -3 4.49 0.15
 18 -2 3 4.47 0.16
 -18 -2 -3 4.57 0.15
 -18 2 3 4.48 0.18
 18 -2 3 4.43 0.17
 18 2 -3 4.42 0.17
 -18 2 -4 2.81 0.12
 18 2 4 2.95 0.12
 18 -2 -4 2.83 0.14
 18 -2 -4 2.87 0.14
 -18 -2 4 2.76 0.13
 -18 -2 -4 2.92 0.12
 18 2 -4 2.94 0.13
 -18 2 4 2.96 0.13
 18 -2 4 3.01 0.13
 -18 -2 5 1.38 0.09
 18 2 5 1.29 0.08
 18 -2 -5 1.46 0.1
 -18 2 -5 1.27 0.08
 -18 -2 5 1.38 0.09
 -18 -2 -5 1.26 0.08
 -18 2 5 1.49 0.09
 18 -2 5 1.24 0.08
 18 2 -5 1.42 0.09
 18 -2 -6 2.75 0.14
 -18 -2 6 2.71 0.14
 -18 -2 6 3.02 0.15
 -18 2 -6 2.65 0.13
 -18 2 6 2.88 0.14
 18 -2 6 2.9 0.14
 -18 -2 -6 2.77 0.13
 -18 -2 7 1.43 0.1
 18 -2 -7 1.45 0.11
 -18 -2 7 1.46 0.1
 -18 2 -7 1.4 0.1
 -18 2 7 1.33 0.1
 -18 2 7 1.35 0.1
 18 -2 7 1.49 0.1
 -18 -2 -7 1.51 0.1
 -18 2 -8 1.49 0.1
 -18 -2 8 1.37 0.11
 -18 -2 8 1.34 0.1
 -18 2 8 1.33 0.1
 18 -2 8 1.46 0.1
 -18 2 8 1.38 0.1
 -18 -2 -8 1.35 0.1
 18 -3 0 0.31 0.05
 -18 -3 0 0.32 0.04
 18 3 0 0.42 0.04
 18 -3 0 0.32 0.05
 18 -3 -1 4.24 0.17
 -18 -3 1 4.09 0.16
 18 -3 -1 4.17 0.16
 18 3 1 4.3 0.15
 18 -3 1 3.97 0.16
 18 3 -1 4.3 0.15
 -18 -3 -1 4.42 0.15
 18 -3 1 4.21 0.16
 18 3 2 5.02 0.17
 -18 -3 2 4.61 0.18
 18 -3 -2 4.65 0.18
 18 -3 -2 4.81 0.19
 -18 3 -2 4.61 0.15
 18 -3 2 5.02 0.17
 -18 -3 -2 5.01 0.15
 18 3 -2 4.99 0.18
 18 -3 2 4.67 0.18
 18 -3 -3 1.31 0.08
 -18 3 -3 1.2 0.07
 -18 -3 3 1.12 0.08
 18 -3 -3 1.1 0.08
 18 3 3 1.18 0.06
 -18 -3 -3 1.19 0.06
 18 -3 3 1.17 0.08
 18 3 -3 1.11 0.07
 -18 3 3 1.1 0.08
 18 -3 3 1.22 0.07
 -18 -3 4 3.12 0.14
 -18 3 -4 2.98 0.12
 18 -3 -4 3.22 0.15
 18 -3 -4 3.09 0.15
 18 3 -4 3.18 0.14
 -18 -3 -4 3.08 0.12
 -18 3 4 3.25 0.14
 18 -3 4 3.27 0.14
 -18 -3 5 0.37 0.06
 -18 -3 5 0.44 0.06
 -18 3 -5 0.37 0.05
 18 -3 -5 0.43 0.06
 18 -3 -5 0.49 0.06
 18 -3 5 0.38 0.06
 -18 -3 -5 0.41 0.05
 18 3 -5 0.41 0.06
 -18 3 5 0.4 0.06
 -18 -3 6 0.71 0.07
 -18 -3 6 0.71 0.07
 -18 3 -6 0.71 0.07
 18 -3 -6 0.66 0.08
 -18 -3 -6 0.61 0.07
 18 -3 6 0.79 0.08
 -18 3 6 0.8 0.08
 -18 -3 7 0.36 0.07
 18 -3 -7 0.27 0.06
 -18 3 -7 0.21 0.06
 -18 -3 7 0.24 0.06
 -18 3 7 0.28 0.06
 -18 3 7 0.36 0.06
 18 -3 7 0.28 0.06
 -18 -3 -7 0.35 0.06
 18 4 0 1.63 0.08
 -18 -4 0 1.59 0.08
 18 -4 0 1.54 0.09
 18 -4 0 1.67 0.09
 18 -4 -1 4.04 0.16
 18 4 1 4.06 0.15
 18 -4 -1 4.04 0.17
 -18 4 -1 4.22 0.14
 -18 -4 1 4.44 0.16
 18 4 -1 4.16 0.15
 18 -4 1 4.3 0.17
 18 -4 1 4.09 0.16
 -18 -4 2 2.72 0.12
 18 -4 -2 3.09 0.14
 -18 4 -2 3.09 0.11
 18 -4 2 2.8 0.13
 18 -4 2 2.86 0.12
 18 4 -2 3 0.12
 18 -4 -3 6.8 0.24
 18 -4 -3 6.57 0.24
 -18 -4 3 6.24 0.23
 -18 4 -3 7.02 0.22
 18 -4 3 6.66 0.24
 -18 -4 -3 6.9 0.21
 18 -4 3 6.77 0.23
 18 4 -3 6.65 0.23
 -18 4 3 7.01 0.24
 -18 4 -4 6.2 0.21
 -18 -4 4 6.54 0.24
 18 -4 -4 6.48 0.24
 18 -4 -4 6.94 0.25
 -18 -4 4 6.59 0.23
 -18 -4 -4 6.17 0.21
 -18 4 4 6.62 0.24
 18 -4 4 6.69 0.24
 18 -4 4 6.58 0.22
 18 4 -4 6.38 0.23
 18 -4 -5 1.46 0.1
 -18 -4 5 1.88 0.11
 18 -4 -5 1.57 0.1
 -18 4 -5 1.52 0.09
 -18 -4 5 1.61 0.1
 -18 4 5 1.69 0.1
 -18 -4 -5 1.45 0.09
 18 -4 5 1.65 0.1
 -18 -4 6 3.99 0.17
 -18 4 -6 3.54 0.16
 18 -4 -6 3.66 0.17
 -18 -4 6 3.73 0.17
 -18 4 6 3.86 0.17
 -18 -4 -6 3.53 0.15
 18 -4 6 3.84 0.17
 -18 4 -7 0.1 0.05
 -18 -4 7 0.04 0.02
 18 -4 -7 0.13 0.06
 -18 -4 7 0.11 0.05
 -18 -4 -7 0.13 0.05
 -18 4 7 0.12 0.05
 -18 4 7 0.03 0.02
 18 -4 7 0.09 0.05
 -18 -5 0 3.4 0.13
 18 -5 0 3.36 0.14
 18 -5 0 3.44 0.15
 -18 -5 1 1.81 0.09
 18 -5 -1 1.8 0.1
 -18 5 -1 1.82 0.08
 18 -5 -1 1.78 0.1
 18 -5 1 1.67 0.09
 18 5 -1 1.78 0.09
 18 -5 1 1.85 0.1
 -18 5 -2 4.42 0.15
 18 -5 -2 4.28 0.18
 18 -5 -2 4.2 0.18
 -18 -5 2 4.54 0.17
 18 -5 2 4.35 0.17
 18 5 -2 4.33 0.16
 18 -5 2 4.62 0.18
 18 -5 -3 2.34 0.12
 -18 -5 3 2.33 0.11
 18 -5 -3 2.34 0.12
 -18 5 -3 2.28 0.1
 -18 -5 3 2.42 0.12
 18 5 -3 1.98 0.1
 18 -5 3 2.49 0.12
 -18 -5 -3 2.27 0.1
 18 -5 3 2.38 0.11
 -18 5 -4 1.53 0.09
 18 -5 -4 1.71 0.11
 -18 -5 4 1.59 0.09
 -18 -5 4 1.71 0.1
 18 -5 -4 1.63 0.1
 18 -5 4 1.7 0.1
 -18 5 4 1.81 0.1
 18 -5 4 1.6 0.09
 -18 -5 -4 1.51 0.08
 -18 5 -5 1.54 0.09
 -18 -5 5 1.51 0.09
 -18 -5 5 1.72 0.1
 18 -5 -5 1.72 0.11
 18 -5 -5 1.81 0.11
 -18 5 5 1.82 0.1
 -18 -5 -5 1.61 0.09
 18 -5 5 1.73 0.11
 -18 -5 6 2.41 0.13
 -18 5 -6 2.41 0.12
 18 -5 -6 2.41 0.13
 18 -5 -6 2.32 0.13
 -18 -5 6 2.34 0.13
 -18 5 6 2.4 0.13
 18 -5 6 2.7 0.14
 -18 -5 -6 2.35 0.12
 -18 -5 7 1.45 0.11
 -18 -5 7 1.51 0.1
 -18 5 -7 1.59 0.1
 18 -5 -7 1.4 0.11
 -18 -5 -7 1.52 0.1
 -18 5 7 1.53 0.11
 18 -5 7 1.47 0.11
 -18 5 7 1.57 0.1
 18 -6 0 1.25 0.08
 -18 -6 0 1.33 0.07
 18 -6 0 1.27 0.08
 18 -6 -1 2.94 0.13
 -18 6 -1 2.89 0.11
 18 -6 -1 2.85 0.13
 -18 -6 1 2.74 0.12
 18 -6 1 2.95 0.13
 18 -6 1 2.82 0.13
 18 -6 -2 1.53 0.1
 -18 -6 2 1.42 0.08
 -18 6 -2 1.49 0.08
 18 -6 -2 1.41 0.09
 18 -6 2 1.49 0.09
 18 -6 2 1.57 0.09
 18 -6 -3 2.5 0.13
 18 -6 -3 2.67 0.13
 -18 6 -3 2.39 0.11
 -18 -6 3 2.56 0.12
 18 -6 3 2.54 0.12
 -18 -6 -3 2.31 0.1
 18 -6 3 2.56 0.13
 -18 -6 4 3.02 0.13
 18 -6 -4 3.77 0.16
 -18 -6 4 3.04 0.14
 18 -6 -4 3.08 0.15
 -18 6 -4 3.16 0.13
 18 -6 4 3.06 0.14
 18 -6 4 3.23 0.15
 -18 6 4 3.28 0.15
 -18 -6 -4 2.99 0.13
 18 -6 -5 2.02 0.12
 -18 -6 5 1.69 0.11
 18 -6 -5 1.81 0.11
 -18 6 -5 1.78 0.1
 -18 -6 5 1.53 0.1
 18 -6 5 1.93 0.11
 -18 6 5 1.93 0.11
 -18 -6 -5 1.85 0.1
 -18 -6 6 0.64 0.08
 -18 -6 6 0.72 0.07
 18 -6 -6 0.57 0.07
 18 -6 -6 0.53 0.07
 -18 6 -6 0.61 0.07
 18 -6 6 0.68 0.08
 -18 -6 -6 0.59 0.07
 -18 6 6 0.64 0.07
 -18 -6 7 0.16 0.05
 -18 6 -7 0.23 0.06
 -18 -6 7 0.14 0.06
 18 -6 -7 0.28 0.06
 -18 -6 -7 0.14 0.05
 18 -6 7 0.3 0.06
 -18 6 7 0.18 0.06
 18 -7 0 4.14 0.17
 18 -7 0 4.61 0.18
 -18 7 -1 2.09 0.09
 18 -7 -1 2.11 0.12
 -18 -7 1 2 0.1
 18 -7 -1 2.09 0.11
 18 -7 1 2.16 0.11
 18 -7 1 2.11 0.11
 18 -7 -2 2.44 0.12
 -18 -7 2 2.32 0.11
 18 -7 -2 2.58 0.13
 -18 7 -2 2.39 0.11
 18 -7 2 2.47 0.12
 18 -7 2 2.47 0.12
 18 -7 -3 8.87 0.3
 -18 7 -3 7.89 0.26
 -18 -7 3 8.4 0.28
 18 -7 -3 8 0.29
 18 -7 3 8.18 0.28
 18 -7 3 8.45 0.29
 -18 -7 -3 7.81 0.25
 -18 7 -4 3.47 0.15
 18 -7 -4 3.46 0.16
 18 -7 -4 3.62 0.16
 -18 -7 4 3.61 0.16
 18 -7 4 3.37 0.15
 18 -7 4 3.52 0.16
 -18 -7 -4 3.41 0.14
 18 -7 -5 0.42 0.07
 18 -7 -5 0.6 0.07
 -18 7 -5 0.6 0.07
 -18 -7 5 0.72 0.08
 -18 -7 -5 0.63 0.07
 18 -7 5 0.49 0.07
 -18 7 5 0.71 0.07
 18 -7 -6 5.8 0.23
 18 -7 -6 5.62 0.23
 -18 7 -6 5.48 0.21
 -18 -7 6 5.66 0.23
 -18 7 6 5.54 0.22
 -18 -7 -6 5.68 0.21
 18 -7 6 5.72 0.23
 18 -8 0 13.77 0.43
 18 -8 0 13.26 0.43
 -18 8 -1 3.48 0.14
 18 -8 -1 4 0.17
 -18 -8 1 3.45 0.15
 18 -8 -1 3.93 0.16
 18 -8 1 4 0.16
 18 -8 1 4.05 0.17
 -18 8 -2 4.3 0.17
 18 -8 -2 4.89 0.2
 -18 -8 2 4.77 0.18
 18 -8 -2 4.66 0.19
 18 -8 2 5.01 0.19
 18 -8 2 5.2 0.2
 -18 8 -3 2.55 0.12
 18 -8 -3 2.73 0.14
 18 -8 -3 3 0.14
 -18 -8 3 3.07 0.14
 18 -8 3 2.92 0.14
 -18 -8 -3 2.88 0.12
 18 -8 3 2.88 0.14
 18 -8 -4 0.89 0.08
 18 -8 -4 0.95 0.09
 -18 -8 4 0.83 0.08
 -18 8 -4 0.78 0.07
 18 -8 4 0.84 0.08
 -18 -8 -4 0.84 0.07
 18 -8 4 0.76 0.07
 18 -8 -5 0.17 0.06
 -18 -8 5 0.15 0.06
 -18 8 -5 0.17 0.06
 18 -8 -5 0.24 0.06
 -18 -8 -5 0.2 0.05
 18 -8 5 0.15 0.05
 18 -8 5 0.14 0.05
 -18 8 5 0.21 0.06
 18 -8 -6 5.11 0.21
 -18 -8 6 4.71 0.21
 18 -8 -6 4.84 0.21
 -18 8 -6 4.83 0.2
 -18 -8 -6 5.13 0.19
 -18 8 6 4.96 0.2
 18 -8 6 4.7 0.21
 18 -9 0 -0.01 0.02
 18 -9 0 0 0.01
 18 -9 -1 0.37 0.06
 -18 9 -1 0.43 0.05
 18 -9 -1 0.36 0.06
 18 -9 1 0.44 0.06
 18 -9 1 0.44 0.06
 -18 -9 2 0.71 0.07
 18 -9 -2 0.9 0.08
 -18 9 -2 0.76 0.07
 18 -9 -2 1 0.08
 18 -9 2 0.75 0.08
 18 -9 2 0.95 0.08
 -18 9 -3 1.99 0.11
 18 -9 -3 2.17 0.12
 -18 -9 3 1.94 0.11
 18 -9 -3 2.07 0.12
 18 -9 3 2.08 0.12
 18 -9 3 1.91 0.11
 -18 -9 4 0.39 0.07
 18 -9 -4 0.42 0.07
 -18 9 -4 0.39 0.06
 18 -9 -4 0.41 0.07
 18 -9 4 0.5 0.06
 18 -9 4 0.57 0.07
 -18 -9 -4 0.49 0.06
 18 -9 -5 0.51 0.07
 -18 9 -5 0.61 0.07
 -18 -9 5 0.56 0.08
 18 -9 -5 0.64 0.07
 18 -9 5 0.68 0.08
 -18 -9 -5 0.62 0.07
 18 -9 5 0.55 0.07
 -18 9 5 0.58 0.07
 18 -10 0 0.14 0.05
 18 -10 0 0.1 0.05
 18 -10 -1 1.63 0.1
 -18 10 -1 1.56 0.09
 18 -10 -1 1.73 0.11
 18 -10 1 1.72 0.1
 18 -10 1 1.83 0.11
 18 -10 -2 0.5 0.06
 -18 10 -2 0.55 0.06
 18 -10 -2 0.39 0.07
 -18 -10 2 0.47 0.06
 18 -10 2 0.5 0.06
 18 -10 2 0.42 0.07
 -18 -10 3 1.31 0.09
 -18 10 -3 1.23 0.09
 18 -10 -3 1.18 0.09
 18 -10 -3 1.37 0.1
 18 -10 3 1.44 0.1
 18 -10 3 1.53 0.1
 -18 -10 4 0.1 0.05
 -18 10 -4 0.05 0.02
 18 -10 -4 0.2 0.06
 18 -10 -4 0.11 0.05
 18 -10 4 0.13 0.05
 -18 -10 -4 0.19 0.05
 18 -10 4 0.1 0.05
 18 -11 0 3.31 0.15
 18 -11 0 3.39 0.16
 18 -11 -1 2.18 0.12
 -18 11 -1 2.16 0.11
 18 -11 -1 2.27 0.13
 18 -11 1 2.24 0.13
 18 -11 1 2.37 0.12
 18 -11 -2 0.2 0.06
 18 -11 -2 0.23 0.06
 -18 11 -2 0.33 0.06
 18 -11 2 0.19 0.05
 18 -11 2 0.29 0.06
 -18 11 -3 0.01 0.02
 18 -11 -3 0.01 0.02
 -18 -11 3 0.02 0.02
 18 -11 3 -0.01 0.02
 18 -11 3 0.02 0.02
 18 -12 0 0.24 0.06
 18 -12 -1 3.36 0.17
 -18 12 -1 3.51 0.15
 18 -12 1 3.37 0.16
 18 -12 1 3.33 0.17
 19 0 -1 0.09 0.04
 -19 0 1 0.09 0.04
 19 0 1 0.09 0.03
 19 0 2 0.08 0.03
 -19 0 2 0.05 0.04
 19 0 -2 0.08 0.04
 -19 0 3 0.12 0.04
 19 0 -3 0.07 0.04
 -19 0 4 -0.01 0.02
 -19 0 -4 -0.01 0.01
 19 0 -4 0.01 0.01
 19 0 4 0 0.01
 19 0 5 -0.01 0.01
 19 0 -5 0.01 0.02
 -19 0 5 0.06 0.05
 -19 0 -5 0 0.01
 -19 0 -6 0.09 0.05
 19 0 6 0 0.01
 -19 0 6 0 0.01
 -19 0 6 0.01 0.02
 19 0 -6 0.02 0.02
 19 0 7 0.01 0.01
 -19 0 7 -0.01 0.01
 -19 0 -7 0.01 0.02
 -19 0 7 0.01 0.02
 -19 -1 0 0.27 0.04
 19 1 0 0.26 0.04
 19 1 0 0.23 0.04
 -19 1 0 0.31 0.04
 19 -1 0 0.26 0.04
 19 -1 0 0.19 0.04
 -19 -1 1 5.9 0.2
 19 1 1 5.88 0.2
 19 -1 -1 5.72 0.21
 19 1 1 5.91 0.19
 19 -1 -1 5.88 0.21
 19 -1 1 5.54 0.2
 -19 -1 -1 6.05 0.19
 19 -1 1 5.61 0.2
 19 1 -1 5.82 0.2
 -19 1 1 5.77 0.2
 19 1 2 0.47 0.05
 -19 -1 2 0.47 0.05
 19 -1 -2 0.62 0.06
 19 -1 -2 0.54 0.06
 19 -1 2 0.58 0.05
 19 -1 2 0.58 0.05
 -19 1 2 0.56 0.06
 19 1 -2 0.54 0.06
 19 -1 -3 2.39 0.12
 -19 -1 3 2.42 0.12
 19 1 3 2.26 0.1
 -19 1 -3 2.3 0.1
 19 -1 -3 2.42 0.12
 19 1 -3 2.44 0.12
 19 -1 3 2.3 0.11
 -19 -1 -3 2.18 0.09
 -19 1 3 2.24 0.11
 -19 -1 4 2.46 0.12
 19 1 4 2.31 0.1
 19 -1 -4 2.37 0.12
 -19 1 -4 2.25 0.1
 19 1 -4 2.35 0.12
 -19 1 4 2.19 0.12
 19 -1 4 2.17 0.11
 -19 -1 -4 2.06 0.1
 -19 -1 5 0.09 0.04
 19 1 5 0.1 0.04
 -19 1 -5 0.08 0.04
 -19 1 5 0.01 0.02
 -19 1 -6 0.8 0.07
 19 1 6 0.72 0.06
 -19 -1 6 0.73 0.08
 19 -1 -6 0.61 0.08
 -19 -1 6 0.79 0.08
 19 1 -6 0.8 0.08
 19 -1 6 0.74 0.07
 -19 -1 -6 0.66 0.07
 -19 1 6 0.81 0.08
 -19 -1 7 0.1 0.05
 -19 1 -7 0 0.02
 19 -1 -7 -0.01 0.02
 -19 -1 7 0 0.02
 -19 1 7 0 0.02
 19 -1 7 0 0.01
 -19 -1 -7 0.02 0.02
 -19 1 7 0 0.02
 -19 -2 0 19.39 0.57
 19 -2 0 19.52 0.58
 19 -2 0 20.06 0.59
 19 2 0 20.1 0.58
 19 2 1 5.82 0.2
 19 -2 -1 5.75 0.21
 -19 -2 1 5.8 0.2
 19 -2 -1 6 0.21
 19 -2 1 5.57 0.2
 19 -2 1 6.04 0.21
 -19 -2 -1 6.03 0.19
 -19 2 1 5.61 0.2
 19 2 -1 5.77 0.2
 19 -2 -2 16.51 0.49
 19 2 2 15.75 0.47
 19 -2 -2 16.73 0.49
 -19 -2 2 15.08 0.47
 -19 2 2 14.98 0.48
 19 2 -2 16.19 0.48
 19 -2 2 15.83 0.48
 19 -2 2 15.41 0.46
 19 2 3 4.64 0.16
 -19 -2 3 4.53 0.18
 -19 2 -3 4.76 0.16
 19 -2 -3 4.61 0.19
 19 -2 -3 4.87 0.19
 19 2 -3 4.66 0.18
 -19 2 3 4.47 0.18
 -19 -2 -3 4.73 0.15
 19 -2 3 4.58 0.18
 19 -2 3 4.51 0.16
 -19 2 -4 2.28 0.11
 -19 -2 4 2.65 0.13
 19 -2 -4 2.55 0.13
 19 2 4 2.37 0.11
 19 -2 -4 2.48 0.13
 -19 2 4 2.79 0.13
 19 2 -4 2.78 0.13
 -19 -2 -4 2.34 0.11
 19 -2 4 2.69 0.12
 19 -2 -5 0.14 0.05
 -19 2 -5 0.15 0.04
 -19 -2 5 0.28 0.06
 19 -2 5 0.21 0.05
 19 2 -5 0.17 0.05
 -19 -2 -5 0.21 0.04
 -19 2 5 0.23 0.05
 -19 2 -6 1.75 0.1
 -19 -2 6 1.65 0.11
 19 -2 -6 1.52 0.11
 -19 -2 6 1.65 0.11
 19 -2 6 1.67 0.1
 -19 -2 -6 1.62 0.1
 19 2 -6 1.82 0.11
 -19 2 6 1.84 0.11
 -19 2 -7 0.09 0.05
 -19 -2 7 0.12 0.05
 -19 2 7 0.02 0.02
 -19 -2 -7 0.15 0.05
 19 -3 0 1.66 0.09
 19 -3 0 1.66 0.09
 -19 -3 0 1.53 0.08
 19 3 0 1.52 0.08
 -19 -3 1 3.89 0.15
 19 3 1 3.8 0.14
 19 -3 -1 3.84 0.16
 19 -3 -1 3.73 0.16
 19 -3 1 3.51 0.15
 19 3 -1 3.8 0.14
 19 -3 1 3.62 0.15
 -19 -3 -1 3.85 0.13
 19 -3 -2 1.06 0.08
 19 3 2 1.18 0.06
 -19 3 -2 1.12 0.06
 -19 -3 2 1.22 0.08
 19 -3 -2 1.18 0.08
 19 -3 2 1.17 0.08
 19 -3 2 1.17 0.07
 19 3 -2 1.16 0.07
 -19 3 2 1.18 0.08
 -19 3 -3 5.48 0.18
 -19 -3 3 5.79 0.21
 19 -3 -3 5.59 0.21
 19 -3 -3 5.7 0.21
 19 3 -3 5.67 0.2
 -19 3 3 5.44 0.21
 -19 -3 -3 5.47 0.18
 19 -3 3 5.51 0.19
 19 -3 3 5.67 0.21
 19 -3 -4 0.78 0.07
 -19 3 -4 0.86 0.06
 -19 -3 4 0.76 0.07
 19 -3 -4 0.8 0.08
 19 -3 4 0.79 0.07
 -19 3 4 0.89 0.08
 -19 -3 -4 0.83 0.06
 19 3 -4 0.79 0.07
 -19 -3 5 4.24 0.18
 -19 3 -5 4.17 0.16
 19 -3 -5 4.48 0.19
 19 -3 -5 4.32 0.19
 -19 -3 5 4.55 0.18
 19 3 -5 4.43 0.18
 19 -3 5 4.15 0.18
 -19 -3 -5 4.08 0.16
 -19 3 5 4.22 0.18
 -19 -3 6 0.32 0.06
 -19 -3 6 0.2 0.06
 -19 3 -6 0.27 0.06
 19 -3 -6 0.17 0.06
 -19 3 6 0.16 0.05
 19 -3 6 0.15 0.05
 -19 -3 -6 0.29 0.05
 -19 -3 7 0.25 0.06
 -19 -3 7 0.31 0.07
 -19 3 -7 0.39 0.06
 19 -3 -7 0.32 0.07
 -19 -3 -7 0.35 0.06
 19 -3 7 0.34 0.06
 -19 3 7 0.24 0.06
 -19 3 7 0.36 0.06
 19 -4 0 11.98 0.38
 19 -4 0 11.73 0.38
 -19 -4 0 12.42 0.36
 19 4 0 12.05 0.36
 19 -4 -1 3.22 0.14
 19 -4 -1 2.9 0.13
 -19 -4 1 3.1 0.13
 19 -4 1 3.07 0.13
 19 -4 1 3.02 0.14
 19 4 -1 3.23 0.12
 -19 4 -2 0.38 0.04
 19 -4 -2 0.32 0.05
 19 -4 -2 0.34 0.05
 -19 -4 2 0.31 0.05
 19 4 -2 0.29 0.05
 19 -4 2 0.29 0.05
 19 -4 2 0.4 0.05
 19 -4 -3 1.23 0.09
 -19 -4 3 1.18 0.08
 19 -4 -3 1.39 0.09
 -19 4 -3 1.18 0.07
 19 -4 3 1.05 0.07
 19 4 -3 1.14 0.08
 -19 -4 -3 1.1 0.06
 -19 4 3 1.28 0.09
 19 -4 3 1.28 0.08
 -19 4 -4 4.13 0.16
 -19 -4 4 4.48 0.18
 -19 -4 4 4.2 0.17
 19 -4 -4 4.3 0.18
 19 -4 -4 4.3 0.18
 -19 4 4 4.29 0.18
 -19 -4 -4 4.2 0.15
 19 4 -4 4.24 0.17
 19 -4 4 4.44 0.18
 -19 -4 5 0.43 0.06
 19 -4 -5 0.46 0.07
 -19 -4 5 0.51 0.06
 -19 4 -5 0.51 0.06
 19 -4 -5 0.51 0.07
 -19 -4 -5 0.46 0.05
 19 -4 5 0.5 0.06
 -19 4 5 0.5 0.07
 19 -4 -6 0.13 0.06
 -19 -4 6 0.2 0.06
 -19 -4 6 0.09 0.05
 -19 4 -6 0.1 0.05
 -19 -4 -6 0.11 0.05
 19 -4 6 0.13 0.05
 -19 4 6 0.13 0.05
 -19 -4 7 0.52 0.07
 -19 4 -7 0.38 0.07
 19 -4 -7 0.57 0.08
 -19 -4 7 0.41 0.07
 19 -4 7 0.61 0.07
 -19 -4 -7 0.61 0.07
 -19 4 7 0.58 0.07
 -19 4 7 0.56 0.07
 -19 -5 0 0.34 0.04
 19 -5 0 0.32 0.05
 19 -5 0 0.33 0.05
 -19 -5 1 0.11 0.04
 19 -5 -1 0.23 0.05
 19 -5 -1 0.19 0.04
 19 -5 1 0.22 0.05
 19 -5 1 0.24 0.05
 -19 5 -2 7.19 0.22
 19 -5 -2 7.86 0.26
 19 -5 -2 7.16 0.26
 -19 -5 2 6.99 0.25
 19 -5 2 7.2 0.25
 19 5 -2 7.37 0.24
 19 -5 2 7.01 0.25
 -19 5 -3 0.91 0.06
 19 -5 -3 0.82 0.08
 -19 -5 3 0.82 0.06
 19 -5 -3 0.87 0.08
 -19 -5 3 0.85 0.07
 -19 -5 -3 0.84 0.06
 19 -5 3 0.98 0.08
 19 5 -3 0.85 0.06
 19 -5 3 0.87 0.07
 19 -5 -4 3.21 0.15
 -19 5 -4 2.96 0.13
 19 -5 -4 3.16 0.15
 -19 -5 4 3.13 0.14
 -19 -5 4 2.83 0.13
 -19 -5 -4 2.94 0.12
 -19 5 4 2.86 0.14
 19 -5 4 3 0.13
 19 5 -4 2.96 0.13
 19 -5 4 3.2 0.14
 -19 -5 5 0.36 0.06
 -19 5 -5 0.43 0.06
 -19 -5 5 0.32 0.06
 19 -5 -5 0.43 0.07
 19 -5 -5 0.37 0.06
 -19 -5 -5 0.34 0.05
 19 -5 5 0.34 0.06
 -19 5 5 0.35 0.06
 19 -5 -6 7.27 0.28
 -19 -5 6 7.47 0.28
 19 -5 -6 7.59 0.28
 -19 -5 6 7.37 0.27
 -19 5 -6 7.35 0.26
 -19 5 6 7.45 0.27
 -19 -5 -6 7.43 0.25
 19 -5 6 7.54 0.28
 19 -5 -7 0.22 0.06
 -19 5 -7 0.3 0.06
 -19 -5 7 0.22 0.06
 -19 -5 7 0.32 0.06
 -19 5 7 0.2 0.06
 19 -5 7 0.32 0.06
 -19 -5 -7 0.26 0.06
 19 -6 0 5.83 0.22
 19 -6 0 5.91 0.22
 19 -6 -1 0.46 0.05
 19 -6 -1 0.55 0.06
 -19 -6 1 0.4 0.05
 19 -6 1 0.5 0.06
 19 -6 1 0.58 0.06
 -19 6 -2 0.89 0.06
 -19 -6 2 0.98 0.07
 19 -6 -2 0.99 0.08
 19 -6 -2 0.87 0.07
 19 -6 2 0.88 0.07
 19 -6 2 0.96 0.07
 19 -6 -3 0.93 0.08
 -19 6 -3 0.77 0.06
 19 -6 -3 0.79 0.08
 -19 -6 3 0.92 0.07
 19 -6 3 0.91 0.08
 19 -6 3 0.85 0.07
 -19 6 -4 3.74 0.15
 19 -6 -4 3.7 0.17
 -19 -6 4 3.88 0.17
 19 -6 -4 3.87 0.17
 19 -6 4 3.59 0.15
 -19 6 4 3.84 0.17
 19 -6 4 3.85 0.17
 -19 -6 -4 3.59 0.14
 -19 -6 5 1.37 0.09
 -19 -6 5 1.52 0.1
 -19 6 -5 1.54 0.09
 19 -6 -5 1.62 0.11
 19 -6 -5 1.63 0.11
 -19 -6 -5 1.47 0.09
 19 -6 5 1.57 0.1
 -19 6 5 1.5 0.1
 -19 -6 6 3.62 0.17
 19 -6 -6 3.64 0.17
 -19 6 -6 3.75 0.16
 -19 -6 6 3.62 0.16
 19 -6 -6 3.53 0.17
 19 -6 6 3.68 0.17
 -19 -6 -6 3.49 0.15
 -19 6 6 3.51 0.17
 19 -7 0 3.2 0.15
 19 -7 0 3.52 0.15
 19 -7 -1 1.46 0.09
 19 -7 -1 1.68 0.1
 -19 -7 1 1.5 0.09
 19 -7 1 1.49 0.09
 19 -7 1 1.55 0.1
 -19 -7 2 1.59 0.1
 -19 7 -2 1.66 0.09
 19 -7 -2 1.75 0.1
 19 -7 -2 1.72 0.11
 19 -7 2 1.74 0.1
 19 -7 2 1.69 0.1
 19 -7 -3 1.6 0.11
 19 -7 -3 1.68 0.1
 -19 -7 3 1.59 0.1
 -19 7 -3 1.62 0.09
 19 -7 3 1.55 0.1
 19 -7 3 1.7 0.1
 -19 7 -4 0.33 0.05
 -19 -7 4 0.44 0.06
 19 -7 -4 0.37 0.06
 19 -7 -4 0.37 0.06
 -19 -7 -4 0.4 0.05
 19 -7 4 0.5 0.06
 19 -7 4 0.49 0.06
 -19 -7 5 0.02 0.02
 19 -7 -5 -0.01 0.02
 -19 7 -5 0.02 0.02
 19 -7 -5 0.01 0.02
 -19 -7 -5 0.01 0.02
 19 -7 5 0.03 0.02
 -19 7 5 -0.01 0.02
 -19 -7 6 0.54 0.07
 -19 7 -6 0.61 0.07
 19 -7 -6 0.52 0.07
 19 -7 -6 0.58 0.08
 19 -7 6 0.61 0.07
 -19 -7 -6 0.51 0.07
 -19 7 6 0.48 0.07
 19 -8 0 0.49 0.07
 19 -8 0 0.56 0.06
 19 -8 -1 0.23 0.06
 -19 -8 1 0.23 0.04
 19 -8 -1 0.29 0.05
 19 -8 1 0.27 0.05
 19 -8 1 0.24 0.05
 19 -8 -2 1.57 0.1
 19 -8 -2 1.55 0.1
 -19 -8 2 1.5 0.09
 -19 8 -2 1.41 0.08
 19 -8 2 1.5 0.1
 19 -8 2 1.56 0.1
 -19 -8 3 0.31 0.06
 19 -8 -3 0.29 0.06
 19 -8 -3 0.22 0.05
 -19 8 -3 0.22 0.05
 19 -8 3 0.24 0.05
 19 -8 3 0.24 0.05
 19 -8 -4 3.58 0.16
 -19 -8 4 3.48 0.16
 19 -8 -4 3.53 0.17
 -19 8 -4 3.08 0.14
 19 -8 4 3.4 0.16
 19 -8 4 3.54 0.15
 -19 -8 -4 3.32 0.14
 -19 -8 5 3.1 0.16
 -19 8 -5 3.33 0.15
 19 -8 -5 3.05 0.16
 19 -8 -5 3.15 0.16
 -19 8 5 3.04 0.15
 -19 -8 -5 3.13 0.14
 19 -8 5 3.12 0.15
 19 -9 0 0.01 0.01
 19 -9 0 0.08 0.04
 19 -9 -1 1.67 0.11
 19 -9 -1 1.57 0.1
 19 -9 1 1.72 0.11
 19 -9 1 1.64 0.1
 -19 -9 2 7.39 0.27
 19 -9 -2 8.13 0.29
 19 -9 -2 8.43 0.3
 -19 9 -2 7.33 0.25
 19 -9 2 8.27 0.29
 19 -9 2 8.37 0.29
 -19 9 -3 0.19 0.05
 19 -9 -3 0.25 0.06
 -19 -9 3 0.23 0.05
 19 -9 -3 0.24 0.06
 19 -9 3 0.26 0.06
 19 -9 3 0.16 0.05
 19 -9 -4 4.7 0.2
 19 -9 -4 4.2 0.19
 -19 -9 4 4.72 0.2
 -19 9 -4 4.65 0.18
 19 -9 4 4.67 0.19
 19 -9 4 4.55 0.2
 19 -9 -5 0.78 0.08
 -19 9 -5 0.77 0.08
 19 -9 -5 0.73 0.08
 -19 -9 5 0.77 0.08
 19 -9 5 0.76 0.08
 -19 9 5 0.9 0.08
 -19 -9 -5 0.81 0.07
 19 -9 5 0.94 0.08
 19 -10 0 1.71 0.11
 19 -10 0 1.61 0.1
 19 -10 -1 1.52 0.11
 19 -10 -1 1.49 0.1
 19 -10 1 1.6 0.11
 19 -10 1 1.77 0.1
 19 -10 -2 0.34 0.06
 -19 -10 2 0.27 0.06
 19 -10 -2 0.28 0.06
 -19 10 -2 0.3 0.05
 19 -10 2 0.3 0.06
 19 -10 2 0.36 0.06
 -19 10 -3 0.95 0.08
 19 -10 -3 0.84 0.08
 -19 -10 3 0.83 0.08
 19 -10 -3 0.72 0.08
 19 -10 3 0.97 0.08
 19 -10 3 0.81 0.08
 19 -10 -4 3.24 0.17
 19 -10 -4 3.6 0.16
 -19 10 -4 3.41 0.15
 -19 -10 4 3.35 0.16
 19 -10 4 3.54 0.16
 19 -10 4 3.23 0.16
 19 -11 0 2.38 0.14
 19 -11 0 2.12 0.12
 19 -11 -1 4.06 0.18
 19 -11 -1 4.26 0.19
 19 -11 1 4.17 0.19
 19 -11 1 3.94 0.18
 -19 11 -2 2.04 0.11
 19 -11 -2 2.04 0.12
 19 -11 -2 1.93 0.13
 19 -11 2 2.05 0.12
 19 -11 2 2.09 0.13
 -19 11 -3 0.39 0.06
 -19 -11 3 0.44 0.07
 19 -11 -3 0.45 0.07
 19 -11 3 0.39 0.07
 19 -11 3 0.4 0.06
 -20 0 0 0.11 0.03
 20 0 0 0.13 0.04
 20 0 0 0.17 0.04
 20 0 1 3.84 0.15
 -20 0 1 3.56 0.15
 20 0 -1 3.77 0.15
 20 0 -1 3.85 0.15
 20 0 1 3.69 0.14
 -20 0 -1 4.01 0.14
 -20 0 2 9.28 0.3
 20 0 2 9.13 0.28
 20 0 -2 8.47 0.3
 20 0 -2 8.84 0.3
 20 0 2 9.21 0.29
 20 0 -3 8.22 0.29
 20 0 3 8.23 0.27
 -20 0 3 8.37 0.28
 -20 0 -4 0.39 0.05
 20 0 4 0.4 0.05
 -20 0 4 0.39 0.06
 20 0 -4 0.51 0.06
 20 0 -5 1.23 0.09
 20 0 5 1.11 0.08
 -20 0 -5 1.15 0.07
 -20 0 5 1.17 0.09
 20 0 6 9.96 0.34
 20 0 -6 10.69 0.36
 -20 0 -6 9.75 0.32
 -20 0 6 10.71 0.35
 20 0 7 1.75 0.11
 -20 0 7 1.84 0.12
 -20 0 -7 1.94 0.11
 -20 0 7 1.78 0.12
 20 0 -7 1.88 0.12
 -20 1 0 6.94 0.23
 20 1 0 6.94 0.23
 -20 -1 0 7.05 0.23
 20 -1 0 6.57 0.24
 20 -1 0 7.27 0.24
 20 -1 -1 5.93 0.22
 20 1 1 6.12 0.21
 -20 -1 1 6.17 0.21
 20 1 1 6.31 0.21
 20 -1 -1 6.26 0.22
 20 -1 1 6.02 0.22
 -20 1 1 6.34 0.22
 20 1 -1 6.24 0.22
 20 -1 1 5.98 0.21
 -20 -1 -1 6.16 0.2
 20 1 2 4.61 0.17
 -20 -1 2 4.45 0.17
 20 -1 -2 4.54 0.18
 20 -1 -2 4.71 0.18
 20 1 -2 4.7 0.18
 20 -1 2 4.74 0.18
 20 -1 2 4.61 0.17
 -20 1 2 4.65 0.18
 20 -1 -3 0.88 0.08
 -20 -1 3 0.92 0.07
 -20 1 -3 0.87 0.06
 20 1 3 0.87 0.06
 20 -1 -3 0.92 0.07
 -20 1 3 0.91 0.07
 20 -1 3 0.86 0.07
 20 1 -3 0.95 0.07
 20 -1 -4 1.01 0.08
 -20 -1 4 1.02 0.08
 -20 1 -4 1.01 0.07
 20 1 4 0.91 0.07
 20 -1 4 0.92 0.07
 -20 1 4 1.08 0.08
 -20 -1 -4 1.02 0.06
 20 1 -4 1.08 0.08
 20 1 5 0.91 0.07
 20 -1 -5 0.98 0.08
 -20 1 -5 0.84 0.07
 -20 -1 5 0.86 0.08
 -20 1 5 0.85 0.08
 -20 -1 -5 0.92 0.07
 20 1 -5 1.03 0.08
 20 -1 5 0.85 0.07
 -20 -1 6 5.93 0.23
 -20 1 -6 5.58 0.21
 -20 -1 6 5.93 0.23
 20 -1 -6 5.77 0.24
 -20 1 6 5.98 0.23
 20 1 -6 6.08 0.24
 -20 -1 -6 5.52 0.21
 20 -1 6 5.73 0.22
 -20 1 -7 0.14 0.05
 -20 -1 7 0.23 0.06
 20 -1 -7 0.24 0.06
 -20 -1 7 0.17 0.06
 -20 -1 -7 0.17 0.05
 -20 1 7 0.21 0.06
 -20 1 7 0.23 0.06
 20 -1 7 0.17 0.05
 20 2 0 0.5 0.05
 -20 -2 0 0.54 0.05
 20 -2 0 0.5 0.05
 20 -2 0 0.5 0.05
 -20 -2 1 1.8 0.1
 20 -2 -1 1.94 0.1
 20 2 1 1.87 0.09
 20 -2 -1 1.9 0.1
 -20 2 1 1.98 0.1
 20 -2 1 1.8 0.09
 20 2 -1 1.87 0.1
 20 -2 1 1.92 0.1
 -20 -2 -1 1.99 0.09
 20 -2 -2 1.19 0.08
 20 2 2 1.28 0.07
 20 -2 -2 1.2 0.08
 -20 -2 2 1.24 0.08
 -20 2 2 1.21 0.08
 20 -2 2 1.21 0.07
 20 -2 2 1.23 0.08
 20 2 -2 1.26 0.08
 20 2 3 2.55 0.11
 20 -2 -3 2.48 0.13
 -20 -2 3 2.67 0.12
 -20 2 -3 2.55 0.1
 20 -2 -3 2.56 0.13
 20 -2 3 2.36 0.12
 -20 2 3 2.57 0.13
 20 2 -3 2.59 0.12
 20 2 4 1.5 0.08
 20 -2 -4 1.63 0.1
 -20 -2 4 1.8 0.1
 -20 2 -4 1.78 0.09
 20 -2 -4 1.8 0.11
 -20 -2 -4 1.66 0.08
 -20 2 4 1.76 0.11
 20 2 -4 1.67 0.1
 20 -2 4 1.7 0.1
 20 -2 -5 1.32 0.1
 -20 -2 5 1.3 0.09
 -20 2 -5 1.3 0.08
 -20 -2 -5 1.21 0.08
 20 -2 5 1.27 0.09
 -20 2 5 1.51 0.1
 20 2 -5 1.21 0.09
 -20 -2 6 0.57 0.07
 -20 2 -6 0.64 0.07
 20 -2 -6 0.73 0.08
 -20 -2 6 0.67 0.07
 20 2 -6 0.6 0.07
 20 -2 6 0.69 0.07
 -20 -2 -6 0.58 0.06
 -20 2 6 0.68 0.08
 -20 2 -7 1.22 0.09
 20 -2 -7 1.13 0.1
 -20 -2 7 1.16 0.1
 -20 -2 7 1.22 0.1
 -20 -2 -7 1.22 0.09
 -20 2 7 1.32 0.1
 -20 2 7 1.27 0.1
 20 -2 7 1.08 0.09
 -20 -3 0 4.88 0.17
 20 -3 0 4.78 0.18
 20 -3 0 5.22 0.19
 20 3 0 4.95 0.17
 20 -3 -1 2.59 0.12
 20 -3 -1 2.65 0.13
 -20 -3 1 2.61 0.11
 20 3 1 2.65 0.11
 20 3 -1 2.53 0.11
 20 -3 1 2.45 0.12
 20 -3 1 2.4 0.12
 -20 -3 2 5.75 0.21
 20 -3 -2 5.44 0.22
 20 3 2 5.98 0.2
 20 -3 -2 5.98 0.22
 20 -3 2 6.03 0.21
 20 3 -2 5.72 0.21
 20 -3 2 6.01 0.22
 -20 3 2 5.82 0.22
 20 -3 -3 2.62 0.13
 20 -3 -3 2.51 0.13
 -20 -3 3 2.68 0.13
 -20 3 -3 2.63 0.11
 20 3 -3 2.47 0.12
 20 -3 3 2.62 0.11
 -20 3 3 2.57 0.13
 20 -3 3 2.46 0.12
 -20 3 -4 0.49 0.05
 20 -3 -4 0.46 0.07
 20 -3 -4 0.52 0.07
 -20 -3 4 0.44 0.06
 20 -3 4 0.58 0.06
 -20 3 4 0.52 0.06
 20 3 -4 0.44 0.06
 -20 -3 -4 0.44 0.05
 -20 -3 5 1.89 0.11
 -20 -3 5 1.91 0.11
 20 -3 -5 2.04 0.12
 -20 3 -5 1.77 0.1
 -20 3 5 2.1 0.12
 20 3 -5 1.83 0.11
 -20 -3 -5 1.75 0.09
 20 -3 5 2.09 0.11
 -20 3 -6 0.9 0.08
 -20 -3 6 0.98 0.09
 20 -3 -6 1.01 0.09
 -20 -3 6 0.96 0.08
 20 -3 6 1.02 0.09
 -20 -3 -6 1.01 0.08
 -20 3 6 0.84 0.08
 20 -3 -7 0.15 0.06
 -20 -3 7 0.1 0.06
 -20 3 -7 0.04 0.02
 -20 -3 7 0.15 0.06
 -20 -3 -7 0.01 0.02
 -20 3 7 0.08 0.06
 20 -3 7 0.07 0.05
 -20 3 7 0.11 0.06
 20 -4 0 0.52 0.06
 -20 -4 0 0.45 0.05
 20 4 0 0.4 0.04
 20 -4 0 0.47 0.06
 20 -4 -1 21.03 0.62
 -20 -4 1 21.01 0.61
 20 -4 -1 20.57 0.63
 20 -4 1 21.12 0.63
 20 4 -1 21.16 0.61
 20 -4 1 21.04 0.62
 20 -4 -2 4.94 0.19
 20 -4 -2 4.71 0.19
 -20 -4 2 4.85 0.18
 20 -4 2 4.86 0.18
 20 4 -2 4.51 0.17
 20 -4 2 4.66 0.19
 -20 4 -3 1.42 0.08
 -20 -4 3 1.51 0.09
 20 -4 -3 1.43 0.1
 20 -4 -3 1.41 0.1
 -20 4 3 1.39 0.09
 20 4 -3 1.35 0.09
 20 -4 3 1.75 0.1
 20 -4 3 1.49 0.08
 20 -4 -4 0.37 0.06
 -20 4 -4 0.39 0.05
 20 -4 -4 0.37 0.06
 -20 -4 4 0.39 0.05
 -20 -4 4 0.38 0.06
 -20 4 4 0.44 0.06
 20 4 -4 0.26 0.05
 -20 -4 -4 0.36 0.05
 20 -4 4 0.41 0.06
 -20 -4 5 1.73 0.11
 -20 -4 5 1.69 0.1
 -20 4 -5 1.78 0.1
 20 -4 -5 1.95 0.12
 20 -4 -5 1.82 0.12
 20 -4 5 1.72 0.11
 -20 -4 -5 1.82 0.1
 -20 4 5 1.69 0.11
 -20 -4 6 2.82 0.15
 20 -4 -6 2.9 0.15
 -20 4 -6 3.08 0.14
 -20 -4 6 3.06 0.15
 -20 4 6 3.18 0.15
 20 -4 6 2.88 0.15
 -20 -4 -6 2.98 0.14
 -20 4 -7 1.34 0.1
 -20 -4 7 1.39 0.1
 -20 -4 7 1.43 0.11
 20 -4 -7 1.36 0.11
 -20 4 7 1.45 0.1
 20 -4 7 1.34 0.1
 -20 4 7 1.63 0.11
 -20 -4 -7 1.48 0.1
 20 -5 0 0.16 0.04
 20 -5 0 0.13 0.04
 -20 -5 0 0.1 0.04
 20 -5 -1 3.07 0.14
 20 -5 -1 3.16 0.14
 -20 -5 1 2.72 0.12
 20 -5 1 3.01 0.14
 20 -5 1 2.98 0.13
 20 -5 -2 0.76 0.07
 -20 -5 2 0.9 0.07
 20 -5 -2 0.94 0.08
 20 -5 2 0.77 0.07
 20 5 -2 0.86 0.06
 20 -5 2 0.92 0.07
 20 -5 -3 1.14 0.09
 -20 5 -3 1.01 0.07
 -20 -5 3 1.01 0.08
 20 -5 -3 1.02 0.08
 20 -5 3 0.85 0.07
 20 -5 3 1.04 0.08
 20 5 -3 0.9 0.07
 -20 -5 4 0.21 0.04
 20 -5 -4 0.19 0.06
 -20 5 -4 0.28 0.05
 -20 -5 4 0.29 0.06
 20 -5 -4 0.28 0.06
 -20 5 4 0.4 0.06
 20 -5 4 0.28 0.06
 -20 -5 -4 0.2 0.04
 20 5 -4 0.19 0.05
 -20 5 -5 1.47 0.09
 -20 -5 5 1.68 0.11
 20 -5 -5 1.84 0.12
 -20 -5 5 1.56 0.1
 20 -5 -5 1.58 0.11
 -20 -5 -5 1.52 0.09
 -20 5 5 1.6 0.1
 20 -5 5 1.75 0.1
 -20 -5 6 2.24 0.12
 -20 5 -6 2.24 0.12
 20 -5 -6 2.26 0.13
 -20 -5 6 2.31 0.13
 20 -5 -6 2.3 0.13
 -20 5 6 2.3 0.13
 20 -5 6 2.28 0.13
 -20 -5 -6 2.23 0.12
 20 -6 0 9.18 0.32
 20 -6 0 9.64 0.32
 20 -6 -1 0.34 0.06
 -20 -6 1 0.48 0.05
 20 -6 -1 0.42 0.06
 20 -6 1 0.38 0.06
 20 -6 1 0.47 0.06
 -20 -6 2 1.91 0.1
 20 -6 -2 2.05 0.12
 20 -6 -2 1.79 0.11
 20 -6 2 1.97 0.11
 20 -6 2 1.86 0.11
 -20 -6 3 0.68 0.07
 -20 6 -3 0.58 0.06
 20 -6 -3 0.62 0.07
 20 -6 -3 0.77 0.08
 20 -6 3 0.69 0.07
 20 -6 3 0.57 0.06
 20 -6 -4 0.68 0.07
 -20 6 -4 0.58 0.06
 -20 -6 4 0.57 0.07
 20 -6 -4 0.72 0.08
 20 -6 4 0.53 0.06
 -20 6 4 0.58 0.07
 20 -6 4 0.7 0.07
 20 -6 -5 0.67 0.08
 -20 -6 5 0.66 0.08
 -20 6 -5 0.63 0.07
 20 -6 -5 0.63 0.08
 -20 -6 -5 0.57 0.06
 -20 6 5 0.61 0.07
 20 -6 5 0.62 0.07
 20 -6 -6 1.24 0.1
 -20 -6 6 1.14 0.09
 -20 -6 6 1.33 0.09
 20 -6 -6 1.43 0.1
 -20 6 -6 1.19 0.09
 -20 -6 -6 1.18 0.09
 -20 6 6 1.17 0.1
 20 -6 6 1.21 0.1
 20 -7 0 0.01 0.01
 20 -7 0 0.01 0.02
 20 -7 -1 0.88 0.08
 -20 -7 1 0.86 0.07
 20 -7 -1 0.85 0.07
 20 -7 1 0.96 0.08
 20 -7 1 0.83 0.07
 20 -7 -2 0.38 0.06
 20 -7 -2 0.28 0.05
 -20 -7 2 0.3 0.05
 20 -7 2 0.28 0.06
 20 -7 2 0.23 0.05
 20 -7 -3 1.12 0.09
 -20 7 -3 1.07 0.08
 20 -7 -3 1.17 0.09
 -20 -7 3 1.15 0.09
 20 -7 3 1.19 0.09
 20 -7 3 1.37 0.09
 -20 7 -4 0.98 0.08
 20 -7 -4 1.06 0.09
 20 -7 -4 1.12 0.09
 -20 -7 4 1.28 0.09
 20 -7 4 1.21 0.09
 -20 7 4 1.08 0.09
 20 -7 4 1.06 0.08
 20 -7 -5 0.21 0.06
 -20 -7 5 0.08 0.06
 -20 7 -5 0.16 0.05
 20 -7 -5 0.15 0.06
 -20 -7 -5 0.11 0.05
 -20 7 5 0.18 0.06
 20 -7 5 0.13 0.05
 20 -7 -6 2.47 0.14
 -20 7 -6 2.81 0.14
 20 -7 -6 2.65 0.14
 20 -7 6 2.65 0.15
 -20 -7 -6 2.71 0.13
 -20 7 6 2.7 0.14
 20 -8 0 0.59 0.07
 20 -8 0 0.74 0.08
 20 -8 -1 0.46 0.06
 20 -8 -1 0.54 0.06
 20 -8 1 0.45 0.06
 20 -8 1 0.43 0.06
 -20 -8 2 1 0.08
 20 -8 -2 1.27 0.1
 20 -8 -2 1.03 0.08
 20 -8 2 1.08 0.09
 20 -8 2 1.05 0.08
 20 -8 -3 2.52 0.14
 -20 8 -3 2.37 0.12
 -20 -8 3 2.65 0.13
 20 -8 -3 2.67 0.14
 20 -8 3 2.48 0.13
 20 -8 3 2.6 0.13
 -20 -8 4 0.92 0.08
 20 -8 -4 0.84 0.08
 -20 8 -4 0.91 0.08
 20 -8 -4 1 0.09
 20 -8 4 0.92 0.08
 20 -8 4 0.94 0.08
 20 -8 -5 1.28 0.1
 -20 -8 5 1.29 0.1
 -20 8 -5 1.36 0.09
 20 -8 -5 1.33 0.1
 -20 8 5 1.5 0.1
 20 -8 5 1.56 0.11
 20 -9 0 3.96 0.18
 20 -9 0 4.14 0.18
 20 -9 -1 0.47 0.06
 20 -9 -1 0.43 0.07
 20 -9 1 0.43 0.06
 20 -9 1 0.42 0.07
 20 -9 -2 0.07 0.05
 -20 -9 2 0.02 0.02
 20 -9 -2 0.14 0.05
 20 -9 2 0.12 0.05
 20 -9 2 0.06 0.05
 -20 9 -3 0.19 0.05
 20 -9 -3 0.22 0.06
 -20 -9 3 0.25 0.05
 20 -9 -3 0.24 0.06
 20 -9 3 0.33 0.06
 20 -9 3 0.23 0.06
 20 -9 -4 2.06 0.13
 -20 9 -4 2.02 0.11
 -20 -9 4 2.26 0.12
 20 -9 -4 1.9 0.12
 20 -9 4 2.04 0.12
 20 -9 4 2.06 0.12
 20 -10 0 -0.02 0.02
 20 -10 0 0.01 0.02
 20 -10 -1 0.81 0.08
 20 -10 -1 0.85 0.09
 20 -10 1 0.84 0.08
 20 -10 1 0.8 0.08
 20 -10 -2 6.52 0.25
 20 -10 -2 6.37 0.24
 20 -10 2 5.94 0.24
 20 -10 2 5.95 0.24
 20 -10 -3 1.1 0.1
 -20 -10 3 1.23 0.09
 20 -10 -3 1.17 0.09
 -20 10 -3 1.19 0.09
 20 -10 3 1.24 0.1
 20 -10 3 1.19 0.09
 20 -11 0 4.8 0.21
 20 -11 0 5.02 0.2
 20 -11 -1 0.52 0.07
 20 -11 -1 0.39 0.06
 20 -11 1 0.56 0.07
 20 -11 1 0.5 0.07
 20 -11 -2 1.27 0.1
 20 -11 2 1.33 0.11
 20 -11 2 1.25 0.1
 21 0 0 0.01 0.01
 -21 0 0 0 0.01
 21 0 0 0.01 0.01
 21 0 -1 0.11 0.04
 21 0 1 0.05 0.03
 21 0 1 0.09 0.03
 -21 0 1 0.13 0.04
 21 0 -1 0.07 0.04
 -21 0 -1 0.09 0.03
 21 0 2 0.02 0.01
 21 0 -2 0.07 0.04
 -21 0 2 0.01 0.02
 21 0 -3 0 0.01
 21 0 3 0 0.01
 -21 0 3 -0.02 0.02
 21 0 4 0.01 0.01
 -21 0 -4 0.01 0.01
 -21 0 4 -0.03 0.02
 21 0 -4 0.01 0.01
 -21 0 -5 -0.01 0.01
 21 0 -5 0.08 0.05
 -21 0 5 0 0.02
 21 0 5 0.01 0.01
 -21 0 6 0 0.02
 21 0 6 -0.01 0.01
 21 0 -6 0.01 0.02
 -21 0 -6 -0.01 0.01
 -21 0 -7 -0.03 0.01
 -21 0 7 0.01 0.02
 21 0 -7 0.13 0.06
 -21 0 7 0.01 0.02
 21 -1 0 0.71 0.06
 -21 1 0 0.64 0.06
 21 1 0 0.64 0.06
 -21 -1 0 0.63 0.06
 21 -1 0 0.71 0.06
 21 1 1 2.83 0.12
 21 -1 -1 2.81 0.13
 -21 -1 1 2.88 0.12
 21 -1 -1 2.68 0.13
 21 1 1 2.79 0.12
 -21 1 -1 2.83 0.12
 21 1 -1 2.72 0.12
 -21 -1 -1 2.84 0.12
 21 -1 1 2.91 0.13
 -21 1 1 2.67 0.12
 21 -1 1 2.72 0.12
 21 1 2 1.94 0.09
 21 -1 -2 1.81 0.1
 21 -1 -2 1.8 0.11
 -21 -1 2 1.72 0.1
 21 -1 2 1.92 0.1
 21 -1 2 1.91 0.09
 -21 1 2 1.8 0.1
 21 1 -2 1.78 0.1
 21 -1 -3 2.97 0.14
 21 1 3 2.91 0.13
 -21 -1 3 3 0.14
 21 -1 -3 3.17 0.15
 -21 1 3 3.04 0.14
 21 -1 3 2.93 0.13
 21 1 -3 3.04 0.14
 21 1 4 3.43 0.14
 -21 -1 4 3.77 0.16
 21 -1 -4 3.91 0.17
 -21 1 -4 3.44 0.14
 21 -1 4 3.61 0.15
 21 1 -4 3.97 0.17
 -21 1 4 3.59 0.16
 -21 1 -5 4.98 0.18
 21 1 5 4.74 0.19
 21 -1 -5 5.07 0.21
 -21 -1 5 5.5 0.21
 21 1 -5 5.51 0.21
 -21 1 5 5.45 0.21
 21 -1 5 5.35 0.2
 -21 -1 -5 4.79 0.18
 -21 1 -6 1.15 0.08
 -21 -1 6 1.27 0.1
 -21 -1 6 1.29 0.09
 21 -1 -6 1.2 0.1
 -21 -1 -6 1.21 0.09
 -21 1 6 1.18 0.1
 21 -1 6 1.16 0.09
 21 1 -6 1.25 0.1
 -21 1 -7 0.91 0.08
 -21 -1 7 1.02 0.09
 21 -1 -7 0.94 0.09
 -21 -1 7 0.87 0.09
 -21 1 7 1.01 0.09
 -21 1 7 0.89 0.09
 -21 -1 -7 0.94 0.08
 21 -1 7 1 0.08
 21 -2 0 2.68 0.13
 21 -2 0 2.96 0.13
 21 2 0 2.78 0.12
 -21 -2 0 2.9 0.12
 21 -2 -1 6.26 0.23
 -21 -2 1 6.46 0.23
 21 -2 -1 6.62 0.24
 21 2 1 6.36 0.22
 21 -2 1 6.57 0.23
 21 2 -1 6.65 0.23
 21 -2 1 6.77 0.23
 -21 2 1 6.51 0.23
 21 -2 -2 3.57 0.16
 -21 -2 2 3.54 0.15
 21 2 2 3.46 0.14
 21 -2 -2 3.75 0.16
 21 -2 2 3.43 0.14
 21 -2 2 3.89 0.15
 21 2 -2 3.41 0.15
 -21 2 2 3.58 0.15
 -21 -2 3 4.61 0.18
 21 2 3 4.07 0.16
 21 -2 -3 4.61 0.19
 21 2 -3 4.25 0.18
 -21 2 3 4.31 0.18
 21 -2 3 4.49 0.17
 -21 2 -4 1.45 0.08
 -21 -2 4 1.58 0.1
 21 -2 -4 1.58 0.1
 21 -2 -4 1.62 0.1
 -21 2 4 1.72 0.1
 21 -2 4 1.58 0.1
 21 2 -4 1.58 0.1
 -21 -2 5 3.66 0.17
 21 -2 -5 3.85 0.18
 -21 2 -5 3.78 0.15
 21 -2 5 3.77 0.16
 -21 -2 -5 3.63 0.15
 21 2 -5 4.25 0.18
 -21 2 5 3.83 0.17
 21 -2 -6 0.85 0.09
 -21 2 -6 0.84 0.07
 -21 -2 6 0.89 0.09
 -21 -2 6 0.9 0.08
 -21 2 6 0.87 0.08
 21 -2 6 0.77 0.08
 -21 -2 -6 0.82 0.07
 21 2 -6 0.86 0.09
 -21 -2 7 3.65 0.18
 -21 -2 7 3.69 0.17
 21 -2 -7 3.71 0.18
 -21 2 -7 3.58 0.16
 -21 2 7 3.83 0.18
 -21 2 7 3.54 0.17
 -21 -2 -7 3.8 0.16
 21 -2 7 3.78 0.17
 -21 -3 0 0.01 0.01
 21 -3 0 0.01 0.02
 21 -3 0 0 0.01
 21 3 0 0.06 0.03
 21 3 1 1.26 0.07
 -21 -3 1 1.28 0.08
 21 -3 -1 1.22 0.08
 21 -3 -1 1.31 0.09
 21 -3 1 1.38 0.09
 21 3 -1 1.28 0.08
 21 -3 1 1.17 0.08
 21 -3 -2 0.69 0.07
 -21 -3 2 0.64 0.06
 21 -3 -2 0.74 0.07
 -21 3 2 0.66 0.07
 21 -3 2 0.69 0.06
 21 3 -2 0.69 0.06
 21 -3 2 0.71 0.07
 -21 -3 3 3.26 0.15
 21 -3 -3 3.4 0.16
 21 -3 -3 3.45 0.16
 21 3 -3 3.12 0.14
 21 -3 3 3.16 0.14
 -21 3 3 3.68 0.16
 21 -3 -4 0.51 0.07
 -21 -3 4 0.42 0.06
 -21 3 -4 0.4 0.05
 21 -3 -4 0.46 0.06
 21 -3 4 0.5 0.06
 21 3 -4 0.33 0.06
 -21 3 4 0.47 0.06
 -21 -3 5 3.19 0.15
 -21 3 -5 2.97 0.13
 21 -3 -5 2.87 0.15
 -21 -3 5 3.03 0.14
 -21 -3 -5 2.76 0.13
 -21 3 5 3.26 0.15
 21 -3 5 3.23 0.15
 21 3 -5 2.88 0.15
 21 -3 -6 1.76 0.12
 -21 -3 6 1.95 0.11
 -21 -3 6 1.79 0.11
 -21 3 -6 1.73 0.1
 21 -3 6 1.57 0.11
 -21 3 6 1.78 0.11
 -21 -3 -6 1.66 0.1
 -21 3 -7 0.79 0.08
 21 -3 -7 0.63 0.08
 -21 -3 7 0.63 0.08
 -21 -3 -7 0.69 0.07
 -21 3 7 0.69 0.08
 -21 3 7 0.65 0.08
 21 -3 7 0.74 0.08
 21 -4 0 4.59 0.18
 -21 -4 0 4.25 0.16
 21 -4 0 4.15 0.17
 21 -4 -1 5.61 0.21
 -21 -4 1 5.12 0.19
 21 -4 -1 5.02 0.2
 21 4 -1 5.39 0.19
 21 -4 1 5.45 0.2
 21 -4 1 5.11 0.2
 -21 -4 2 0.82 0.07
 21 -4 -2 0.92 0.08
 21 -4 -2 1 0.08
 21 -4 2 0.99 0.08
 21 -4 2 0.93 0.07
 21 4 -2 0.78 0.07
 -21 -4 3 2.58 0.13
 21 -4 -3 2.7 0.14
 21 -4 -3 2.32 0.13
 21 -4 3 2.56 0.13
 21 4 -3 2.58 0.12
 21 -4 3 2.48 0.12
 -21 4 3 2.49 0.13
 21 -4 -4 0.35 0.06
 -21 4 -4 0.31 0.05
 -21 -4 4 0.22 0.06
 21 -4 -4 0.35 0.06
 -21 -4 4 0.31 0.05
 -21 4 4 0.36 0.06
 21 4 -4 0.34 0.06
 21 -4 4 0.32 0.05
 -21 -4 5 3.44 0.16
 21 -4 -5 3.36 0.16
 -21 -4 5 3.21 0.15
 21 -4 -5 3.27 0.16
 -21 4 -5 3.12 0.14
 21 4 -5 3.22 0.15
 -21 -4 -5 2.99 0.13
 -21 4 5 3.55 0.16
 21 -4 5 3.24 0.15
 -21 -4 6 1.9 0.12
 21 -4 -6 1.82 0.12
 -21 4 -6 1.97 0.11
 -21 -4 6 1.8 0.11
 21 -4 6 1.95 0.12
 -21 -4 -6 1.87 0.1
 -21 4 6 1.96 0.12
 21 -5 0 0.38 0.05
 21 -5 0 0.37 0.05
 21 -5 -1 6.43 0.23
 21 -5 -1 6.33 0.23
 -21 -5 1 5.9 0.21
 21 -5 1 5.98 0.22
 21 -5 1 6 0.23
 -21 -5 2 0.49 0.06
 21 -5 -2 0.57 0.07
 21 -5 -2 0.43 0.06
 21 -5 2 0.43 0.06
 21 -5 2 0.45 0.06
 21 -5 -3 10.58 0.37
 -21 -5 3 11.24 0.36
 21 -5 -3 11.21 0.37
 -21 5 3 10.98 0.36
 21 5 -3 10.15 0.35
 21 -5 3 11.93 0.37
 21 -5 3 10.34 0.35
 -21 -5 4 2.44 0.13
 21 -5 -4 2.57 0.14
 21 -5 -4 2.63 0.14
 -21 -5 4 2.44 0.12
 -21 5 -4 2.3 0.11
 21 -5 4 2.52 0.13
 21 5 -4 2.32 0.12
 -21 5 4 2.37 0.13
 21 -5 -5 0.43 0.07
 -21 5 -5 0.41 0.06
 -21 -5 5 0.38 0.07
 -21 -5 5 0.27 0.05
 21 -5 -5 0.39 0.07
 -21 5 5 0.29 0.06
 21 -5 5 0.33 0.06
 21 -5 -6 1.42 0.11
 -21 -5 6 1.41 0.1
 -21 -5 6 1.35 0.1
 -21 5 -6 1.42 0.09
 -21 5 6 1.31 0.1
 -21 -5 -6 1.3 0.09
 21 -5 6 1.33 0.1
 21 -6 0 0.24 0.05
 21 -6 0 0.17 0.05
 21 -6 -1 3.05 0.15
 -21 -6 1 2.77 0.12
 21 -6 -1 2.78 0.14
 21 -6 1 2.85 0.14
 21 -6 1 3.03 0.14
 21 -6 -2 1.62 0.1
 -21 -6 2 1.41 0.09
 21 -6 -2 1.62 0.11
 21 -6 2 1.58 0.1
 21 -6 2 1.52 0.1
 21 -6 -3 10.89 0.36
 -21 -6 3 10.17 0.34
 21 -6 -3 10.43 0.36
 21 -6 3 10.66 0.35
 21 -6 3 10.29 0.34
 21 -6 -4 0.83 0.09
 -21 -6 4 0.84 0.08
 -21 6 -4 0.9 0.07
 21 -6 -4 0.85 0.08
 -21 6 4 0.95 0.08
 21 -6 4 0.96 0.08
 21 -6 -5 4.17 0.19
 -21 6 -5 4.3 0.17
 -21 -6 5 4.1 0.19
 21 -6 -5 4.34 0.2
 -21 6 5 4.71 0.2
 21 -6 5 4.64 0.19
 21 -6 -6 0.01 0.02
 -21 6 -6 0.02 0.02
 -21 -6 6 0 0.02
 21 -6 -6 -0.01 0.02
 -21 6 6 0.02 0.02
 21 -6 6 0.02 0.02
 -21 -6 -6 0 0.02
 21 -7 0 0 0.02
 21 -7 0 0.01 0.01
 21 -7 -1 2.98 0.15
 21 -7 -1 3.18 0.15
 21 -7 1 3.33 0.15
 21 -7 1 3.16 0.15
 21 -7 -2 0.64 0.07
 21 -7 -2 0.71 0.08
 -21 -7 2 0.67 0.07
 21 -7 2 0.73 0.07
 21 -7 2 0.77 0.08
 21 -7 -3 0.34 0.06
 21 -7 -3 0.26 0.06
 -21 -7 3 0.47 0.06
 21 -7 3 0.34 0.06
 21 -7 3 0.31 0.06
 21 -7 -4 0.42 0.07
 21 -7 -4 0.33 0.07
 -21 7 -4 0.58 0.06
 -21 -7 4 0.48 0.07
 21 -7 4 0.43 0.07
 21 -7 4 0.5 0.06
 -21 7 4 0.42 0.07
 -21 7 -5 1.43 0.09
 21 -7 -5 1.43 0.11
 -21 -7 5 1.41 0.1
 21 -7 -5 1.44 0.11
 21 -7 5 1.4 0.1
 -21 7 5 1.43 0.1
 21 -8 0 0 0.02
 21 -8 0 0 0.01
 21 -8 -1 1.37 0.1
 21 -8 -1 1.51 0.11
 21 -8 1 1.49 0.1
 21 -8 1 1.42 0.1
 21 -8 -2 0.27 0.06
 21 -8 -2 0.25 0.06
 -21 -8 2 0.18 0.05
 21 -8 2 0.28 0.06
 21 -8 2 0.24 0.05
 -21 -8 3 0.5 0.07
 21 -8 -3 0.57 0.07
 21 -8 -3 0.51 0.07
 21 -8 3 0.57 0.07
 21 -8 3 0.57 0.07
 -21 8 -4 1.48 0.1
 21 -8 -4 1.63 0.11
 -21 -8 4 1.65 0.11
 21 -8 -4 1.81 0.12
 21 -8 4 1.77 0.11
 21 -8 4 1.76 0.11
 -21 -8 5 2.05 0.13
 -21 8 -5 2.35 0.12
 21 -8 -5 2.41 0.14
 21 -8 -5 2.21 0.14
 21 -8 5 2.34 0.13
 -21 8 5 2.26 0.13
 21 -9 0 0.36 0.07
 21 -9 0 0.38 0.06
 21 -9 -1 5.06 0.22
 21 -9 -1 5.1 0.21
 21 -9 1 5.57 0.22
 21 -9 1 5.53 0.22
 21 -9 -2 1.44 0.11
 -21 -9 2 1.5 0.1
 21 -9 -2 1.43 0.1
 21 -9 2 1.57 0.1
 21 -9 2 1.58 0.1
 21 -9 -3 1.54 0.11
 21 -9 -3 1.41 0.11
 -21 -9 3 1.28 0.09
 21 -9 3 1.4 0.1
 21 -9 3 1.22 0.1
 21 -9 -4 1.88 0.12
 21 -9 -4 1.93 0.12
 -21 -9 4 1.68 0.11
 -21 9 -4 1.82 0.11
 21 -9 4 1.85 0.11
 21 -9 4 1.64 0.11
 21 -10 0 3.74 0.17
 21 -10 0 3.73 0.18
 21 -10 -1 3.75 0.17
 21 -10 -1 3.54 0.18
 21 -10 1 4.1 0.18
 21 -10 1 3.91 0.17
 21 -10 -2 2.04 0.12
 21 -10 -2 2.1 0.13
 21 -10 2 2.17 0.13
 21 -10 2 2.11 0.12
 21 -10 -3 1.64 0.11
 21 -10 -3 1.59 0.13
 -21 -10 3 1.56 0.1
 21 -10 3 1.62 0.11
 21 -10 3 1.65 0.11
 21 -11 0 13.12 0.43
 22 0 0 0.38 0.05
 22 0 0 0.46 0.05
 -22 0 0 0.49 0.05
 -22 0 1 6.57 0.23
 22 0 -1 6.66 0.23
 22 0 1 6.43 0.22
 22 0 1 6.33 0.23
 -22 0 -1 6.58 0.22
 22 0 -1 6.26 0.23
 -22 0 2 5.13 0.2
 22 0 2 4.92 0.19
 22 0 -2 5.22 0.2
 22 0 -3 11.58 0.37
 22 0 3 10.14 0.34
 -22 0 3 10.84 0.36
 22 0 4 7.27 0.26
 22 0 -4 8.03 0.29
 -22 0 4 8.25 0.28
 22 0 5 0.65 0.07
 -22 0 5 0.76 0.08
 22 0 -5 0.82 0.08
 -22 0 -6 0.36 0.06
 22 0 6 0.4 0.06
 -22 0 6 0.36 0.07
 22 0 -6 0.36 0.07
 -22 0 -7 6.29 0.23
 22 0 -7 6.18 0.25
 -22 0 7 6.05 0.25
 -22 -1 0 1.74 0.09
 22 1 0 1.73 0.09
 22 -1 0 1.78 0.1
 -22 1 0 1.84 0.1
 22 -1 0 1.84 0.1
 -22 -1 1 5.87 0.21
 22 1 1 6.03 0.21
 22 -1 -1 6.35 0.22
 22 -1 -1 6.2 0.22
 -22 1 -1 5.69 0.21
 -22 1 1 5.79 0.21
 22 -1 1 5.67 0.21
 22 -1 1 5.79 0.21
 22 1 -1 5.96 0.22
 -22 -1 -1 5.89 0.2
 -22 -1 2 3.24 0.14
 22 -1 -2 3.39 0.15
 22 -1 -2 3.6 0.15
 22 1 2 3.11 0.13
 -22 1 2 3.22 0.15
 22 -1 2 3.32 0.14
 22 1 -2 3.2 0.14
 22 -1 2 3.17 0.13
 22 -1 -3 2.52 0.13
 -22 -1 3 2.61 0.13
 22 1 3 2.49 0.12
 22 1 -3 2.61 0.13
 22 -1 3 2.61 0.12
 -22 1 3 2.7 0.13
 22 -1 -4 3.29 0.16
 -22 -1 4 3.25 0.15
 22 1 4 2.78 0.13
 -22 1 4 3.15 0.15
 22 -1 4 3.06 0.14
 22 1 -4 3.34 0.15
 22 -1 -5 0.59 0.08
 -22 -1 5 0.66 0.07
 -22 1 5 0.71 0.08
 22 1 -5 0.54 0.07
 22 -1 5 0.56 0.06
 -22 -1 6 1.52 0.11
 -22 -1 6 1.33 0.1
 22 -1 -6 1.34 0.1
 -22 1 -6 1.29 0.09
 22 -1 6 1.3 0.09
 22 1 -6 1.36 0.1
 -22 -1 -6 1.39 0.09
 -22 1 6 1.23 0.1
 -22 -1 7 3.77 0.18
 -22 1 -7 4.13 0.17
 22 -1 -7 4.2 0.19
 22 -1 7 3.83 0.17
 -22 1 7 3.75 0.18
 -22 -1 -7 4.29 0.17
 -22 -2 0 0.97 0.07
 22 -2 0 0.94 0.07
 22 2 0 1 0.07
 22 -2 0 0.93 0.07
 -22 2 0 1.06 0.07
 22 2 1 2.08 0.1
 -22 -2 1 2.19 0.11
 22 -2 -1 2.04 0.11
 22 -2 -1 2.28 0.12
 -22 2 1 2.17 0.11
 22 -2 1 1.98 0.1
 22 -2 1 2.26 0.11
 22 2 -1 2.32 0.11
 22 -2 -2 0.26 0.06
 22 -2 -2 0.35 0.06
 -22 -2 2 0.3 0.05
 22 2 2 0.29 0.04
 22 2 -2 0.3 0.05
 22 -2 2 0.28 0.05
 22 -2 2 0.28 0.05
 -22 2 2 0.37 0.05
 22 -2 -3 2.27 0.12
 22 -2 -3 2.09 0.12
 22 2 3 1.92 0.1
 -22 -2 3 2.12 0.11
 22 -2 3 2.11 0.11
 22 2 -3 2.08 0.11
 -22 2 3 2.02 0.11
 -22 -2 4 1.4 0.09
 22 -2 -4 1.63 0.11
 -22 2 4 1.51 0.1
 22 2 -4 1.32 0.09
 22 -2 4 1.39 0.09
 22 -2 -5 0.03 0.02
 -22 2 -5 0.01 0.01
 -22 -2 5 -0.02 0.02
 22 -2 5 -0.01 0.01
 22 2 -5 0.02 0.02
 -22 2 5 0.01 0.02
 22 -2 -6 4.05 0.19
 -22 -2 6 3.75 0.17
 -22 -2 6 3.73 0.18
 -22 2 -6 3.87 0.16
 -22 2 6 3.96 0.18
 22 2 -6 4.2 0.18
 -22 -2 -6 3.61 0.15
 22 -2 6 3.7 0.17
 22 3 0 0.08 0.03
 -22 -3 0 0.1 0.04
 22 -3 0 0.01 0.02
 22 3 1 1.62 0.09
 -22 -3 1 1.59 0.09
 22 -3 -1 1.72 0.1
 22 -3 -1 1.79 0.1
 22 3 -1 1.63 0.09
 22 -3 1 1.57 0.09
 22 -3 1 1.5 0.1
 -22 3 1 1.65 0.1
 22 -3 -2 0.36 0.06
 22 -3 -2 0.38 0.06
 -22 -3 2 0.33 0.05
 22 3 -2 0.3 0.05
 -22 3 2 0.34 0.06
 22 -3 2 0.36 0.05
 22 -3 2 0.33 0.05
 -22 -3 3 2.67 0.13
 22 -3 -3 2.8 0.14
 22 -3 -3 2.72 0.14
 22 -3 3 2.64 0.13
 -22 3 3 2.78 0.14
 22 3 -3 2.53 0.13
 -22 -3 4 0.15 0.05
 22 -3 -4 0.1 0.05
 22 -3 -4 0.12 0.06
 22 3 -4 0.16 0.05
 -22 3 4 0.1 0.05
 22 -3 4 0.13 0.05
 -22 3 -5 0.79 0.07
 22 -3 -5 0.8 0.08
 -22 -3 5 0.81 0.08
 -22 -3 5 0.8 0.08
 22 -3 5 0.86 0.08
 -22 3 5 0.81 0.08
 22 3 -5 0.86 0.08
 -22 -3 6 0.14 0.05
 22 -3 -6 0.17 0.06
 -22 -3 6 0.1 0.05
 -22 -3 -6 0.19 0.05
 22 -3 6 0.19 0.05
 -22 3 6 0.08 0.03
 22 -4 0 2.65 0.13
 22 -4 0 2.81 0.13
 22 -4 -1 3.32 0.15
 22 -4 -1 3.46 0.16
 -22 -4 1 3.39 0.14
 22 -4 1 3.31 0.15
 22 4 -1 3.19 0.14
 22 -4 1 3.42 0.15
 22 -4 -2 0.23 0.05
 22 -4 -2 0.16 0.05
 -22 -4 2 0.24 0.05
 22 -4 2 0.19 0.05
 22 -4 2 0.14 0.04
 -22 4 2 0.29 0.05
 22 4 -2 0.21 0.05
 -22 -4 3 3.71 0.16
 22 -4 -3 4.11 0.18
 22 -4 -3 3.95 0.18
 22 4 -3 3.76 0.16
 22 -4 3 3.96 0.17
 22 -4 3 3.31 0.15
 -22 4 3 3.94 0.17
 22 -4 -4 0.18 0.06
 -22 -4 4 0.16 0.06
 22 -4 -4 0.15 0.06
 -22 4 4 0.14 0.05
 22 -4 4 0.2 0.05
 22 4 -4 0.22 0.05
 -22 -4 5 2.77 0.14
 -22 4 -5 2.86 0.13
 22 -4 -5 3.12 0.16
 22 -4 -5 3.05 0.16
 -22 -4 5 3.09 0.15
 -22 4 5 2.97 0.15
 22 4 -5 2.97 0.15
 22 -4 5 2.95 0.15
 -22 -4 6 0.25 0.06
 -22 -4 6 0.27 0.06
 -22 4 -6 0.27 0.06
 22 -4 -6 0.41 0.07
 -22 4 6 0.32 0.06
 22 -4 6 0.38 0.06
 22 -5 0 0.09 0.05
 22 -5 0 0.03 0.02
 -22 -5 1 1.2 0.08
 22 -5 -1 1.4 0.1
 22 -5 -1 1.31 0.09
 22 -5 1 1.27 0.09
 22 -5 1 1.41 0.09
 22 -5 -2 0.97 0.09
 -22 -5 2 0.8 0.07
 22 -5 -2 0.97 0.08
 22 -5 2 0.86 0.08
 22 -5 2 0.92 0.08
 -22 -5 3 1.02 0.08
 22 -5 -3 1.1 0.09
 22 -5 -3 1.11 0.09
 -22 5 3 1.05 0.09
 22 -5 3 1.07 0.08
 22 -5 3 0.91 0.07
 -22 -5 4 0.75 0.07
 22 -5 -4 0.82 0.08
 -22 -5 4 0.76 0.08
 22 -5 -4 0.94 0.08
 -22 5 4 0.66 0.08
 22 -5 4 0.84 0.08
 22 5 -4 0.68 0.07
 -22 -5 5 1.63 0.1
 22 -5 -5 1.88 0.12
 -22 -5 5 1.68 0.11
 -22 5 -5 1.93 0.1
 22 -5 -5 1.84 0.12
 -22 5 5 1.86 0.12
 22 -5 5 1.85 0.11
 -22 -5 6 0.15 0.05
 -22 -5 6 0.17 0.05
 -22 5 -6 0.27 0.06
 22 -5 -6 0.27 0.06
 22 -5 6 0.18 0.06
 -22 5 6 0.22 0.06
 22 -6 0 0.88 0.08
 22 -6 0 0.91 0.08
 22 -6 -1 2.04 0.12
 22 -6 -1 1.94 0.11
 -22 -6 1 1.6 0.09
 22 -6 1 1.8 0.11
 22 -6 1 1.82 0.11
 22 -6 -2 1.4 0.1
 -22 -6 2 1.4 0.09
 22 -6 -2 1.41 0.1
 22 -6 2 1.41 0.09
 22 -6 2 1.41 0.09
 22 -6 -3 1.92 0.12
 22 -6 -3 1.95 0.12
 -22 -6 3 1.82 0.11
 22 -6 3 1.88 0.11
 22 -6 3 1.9 0.11
 -22 -6 4 0.88 0.08
 22 -6 -4 0.81 0.08
 22 -6 -4 0.74 0.08
 22 -6 4 0.94 0.08
 -22 6 4 0.76 0.08
 22 -6 -5 6.06 0.25
 -22 6 -5 6.37 0.22
 -22 -6 5 5.98 0.24
 22 -6 -5 6.03 0.25
 22 -6 5 6.61 0.25
 -22 6 5 6.16 0.25
 22 -7 0 2.12 0.12
 22 -7 0 1.99 0.12
 22 -7 -1 4 0.17
 22 -7 -1 4.02 0.18
 22 -7 1 3.56 0.17
 22 -7 1 3.54 0.17
 22 -7 -2 1.59 0.11
 -22 -7 2 1.51 0.1
 22 -7 -2 1.46 0.11
 22 -7 2 1.64 0.1
 22 -7 2 1.63 0.1
 22 -7 -3 8.14 0.3
 -22 -7 3 8.17 0.29
 22 -7 -3 8.47 0.3
 22 -7 3 8.15 0.3
 22 -7 3 7.77 0.28
 22 -7 -4 0.12 0.06
 22 -7 -4 0.02 0.02
 -22 -7 4 0 0.02
 -22 7 4 0 0.02
 22 -7 4 0.01 0.01
 22 -7 -5 1.04 0.1
 -22 -7 5 0.84 0.09
 22 -7 -5 0.81 0.09
 -22 7 -5 0.86 0.08
 22 -7 5 0.84 0.08
 -22 7 5 0.84 0.09
 22 -8 0 0.2 0.06
 22 -8 0 0.13 0.05
 22 -8 -1 4.76 0.2
 22 -8 -1 4.83 0.2
 22 -8 1 4.56 0.2
 22 -8 1 4.68 0.2
 22 -8 -2 0.63 0.08
 -22 -8 2 0.54 0.07
 22 -8 -2 0.61 0.08
 22 -8 2 0.71 0.07
 22 -8 2 0.6 0.07
 22 -8 -3 5.01 0.21
 -22 -8 3 4.96 0.2
 22 -8 -3 4.95 0.21
 22 -8 3 5.12 0.2
 22 -8 3 4.7 0.21
 22 -8 -4 0.02 0.02
 -22 -8 4 0.01 0.02
 22 -8 -4 0.02 0.02
 -22 8 4 0.02 0.02
 22 -8 4 0.04 0.02
 22 -8 4 0.11 0.05
 22 -9 0 0.02 0.02
 22 -9 0 0.01 0.02
 22 -9 -1 0.54 0.08
 22 -9 -1 0.55 0.07
 22 -9 1 0.55 0.07
 22 -9 1 0.55 0.07
 22 -9 -2 0.47 0.07
 22 -9 -2 0.45 0.07
 22 -9 2 0.43 0.07
 22 -9 2 0.41 0.07
 22 -9 -3 1.15 0.09
 -22 -9 3 0.83 0.08
 22 -9 -3 0.96 0.09
 22 -9 3 0.76 0.08
 22 -9 3 0.91 0.09
 22 -10 0 2.79 0.14
 22 -10 0 2.56 0.15
 22 -10 -1 2.92 0.16
 22 -10 -1 2.95 0.15
 22 -10 1 2.75 0.15
 22 -10 1 3.1 0.15
 22 -10 -2 2.48 0.14
 22 -10 2 2.6 0.14
 22 -10 2 2.72 0.14
 23 0 0 0.08 0.04
 23 0 0 0.07 0.04
 -23 0 0 0.06 0.04
 23 0 1 0.1 0.04
 23 0 -1 0.11 0.04
 -23 0 -1 0.07 0.03
 23 0 -1 0.09 0.04
 23 0 -2 -0.01 0.01
 23 0 2 0.01 0.01
 -23 0 2 0.01 0.01
 23 0 3 0 0.01
 23 0 -3 0 0.01
 -23 0 3 0 0.02
 23 0 4 0.01 0.01
 -23 0 4 0 0.02
 23 0 -4 0.07 0.05
 -23 0 5 -0.02 0.02
 23 0 5 0.01 0.01
 23 0 -5 -0.01 0.02
 -23 0 6 0 0.02
 23 0 -6 0.09 0.06
 23 -1 0 8.51 0.29
 23 1 0 8.36 0.28
 23 -1 0 8.17 0.28
 -23 -1 0 8.07 0.27
 -23 1 0 7.99 0.27
 23 -1 -1 2.89 0.14
 -23 1 -1 2.79 0.12
 23 1 1 2.83 0.13
 23 -1 -1 2.98 0.14
 -23 -1 1 2.82 0.13
 23 -1 1 3.15 0.14
 23 -1 1 2.67 0.12
 -23 1 1 3.03 0.14
 23 1 -1 2.79 0.13
 23 1 2 0.4 0.05
 23 -1 -2 0.5 0.07
 -23 -1 2 0.46 0.06
 23 -1 -2 0.39 0.06
 -23 1 2 0.53 0.06
 23 -1 2 0.45 0.05
 23 1 -2 0.33 0.05
 23 -1 -3 0.7 0.07
 23 1 3 0.67 0.06
 -23 -1 3 0.77 0.07
 -23 1 3 0.62 0.07
 23 1 -3 0.65 0.07
 23 -1 3 0.79 0.07
 23 -1 -4 1.79 0.11
 -23 -1 4 1.68 0.11
 23 1 4 1.66 0.09
 23 -1 4 1.61 0.1
 23 1 -4 1.67 0.11
 -23 1 4 1.68 0.11
 23 -1 -5 0.43 0.07
 -23 -1 5 0.52 0.07
 23 -1 5 0.39 0.06
 23 1 -5 0.41 0.07
 -23 1 5 0.49 0.07
 -23 -1 6 1.08 0.09
 23 -1 -6 1.19 0.1
 -23 -1 6 1.08 0.09
 -23 1 6 1.17 0.1
 23 1 -6 1.16 0.1
 23 -1 6 1.08 0.09
 -23 -2 0 1.52 0.09
 -23 2 0 1.65 0.09
 23 2 0 1.58 0.09
 23 -2 0 1.76 0.1
 23 -2 0 1.63 0.1
 23 -2 -1 4.8 0.19
 -23 -2 1 4.72 0.18
 23 2 1 4.41 0.17
 23 -2 -1 4.96 0.19
 23 2 -1 4.35 0.18
 23 -2 1 4.62 0.18
 23 -2 1 4.85 0.19
 -23 2 1 4.56 0.18
 23 -2 -2 5.57 0.21
 23 2 2 5.3 0.19
 23 -2 -2 5.38 0.21
 -23 -2 2 5.49 0.21
 -23 2 2 5.51 0.21
 23 -2 2 5 0.19
 23 2 -2 5.35 0.2
 23 -2 2 5.46 0.21
 -23 -2 3 4.11 0.18
 23 -2 -3 4.23 0.18
 23 -2 -3 4.61 0.19
 -23 2 3 4.1 0.18
 23 -2 3 4.17 0.17
 23 2 -3 4.16 0.18
 23 -2 -4 0.57 0.07
 -23 -2 4 0.45 0.07
 -23 2 4 0.49 0.07
 23 2 -4 0.52 0.07
 23 -2 4 0.54 0.06
 23 -2 -5 0.19 0.06
 -23 -2 5 0.29 0.06
 -23 2 5 0.27 0.06
 23 2 -5 0.2 0.06
 23 -2 5 0.27 0.06
 -23 -2 6 3.53 0.17
 23 -2 -6 3.42 0.17
 -23 -2 6 3.4 0.17
 23 2 -6 3.57 0.17
 23 -2 6 3.85 0.17
 -23 2 6 3.5 0.17
 23 3 0 2.09 0.1
 23 -3 0 2.27 0.12
 -23 -3 0 2.07 0.1
 23 -3 0 2.14 0.11
 -23 -3 1 1.6 0.09
 23 -3 -1 1.84 0.11
 23 -3 -1 1.64 0.1
 23 -3 1 1.73 0.1
 23 3 -1 1.72 0.09
 23 -3 1 1.56 0.09
 -23 3 1 1.62 0.1
 23 -3 -2 1.91 0.11
 23 -3 -2 1.83 0.11
 -23 -3 2 1.89 0.1
 -23 3 2 1.94 0.11
 23 3 -2 1.98 0.11
 23 -3 2 1.77 0.11
 23 -3 2 1.81 0.1
 23 -3 -3 1.22 0.1
 -23 -3 3 1.12 0.08
 23 -3 -3 1.18 0.09
 23 3 -3 1.15 0.09
 23 -3 3 1.26 0.09
 -23 3 3 1.12 0.09
 -23 -3 4 9.03 0.3
 23 -3 -4 8.31 0.31
 23 -3 -4 8.22 0.31
 23 -3 4 8.34 0.3
 23 3 -4 8.42 0.3
 -23 3 4 8.44 0.3
 -23 -3 5 0.83 0.08
 -23 -3 5 0.81 0.08
 23 -3 -5 0.74 0.08
 -23 3 5 0.82 0.08
 23 3 -5 0.77 0.08
 23 -3 5 0.78 0.08
 -23 -3 6 0.12 0.06
 -23 3 -6 0.26 0.06
 23 -3 -6 0.1 0.06
 -23 -3 6 0.22 0.06
 23 -3 6 0.21 0.06
 -23 3 6 0.21 0.06
 23 -4 0 0.77 0.07
 23 -4 0 0.7 0.07
 23 -4 -1 0.29 0.06
 23 -4 -1 0.28 0.06
 -23 -4 1 0.24 0.05
 23 -4 1 0.26 0.05
 23 -4 1 0.35 0.05
 23 -4 -2 1.12 0.09
 23 -4 -2 1.03 0.09
 -23 -4 2 0.99 0.08
 23 -4 2 0.78 0.07
 23 -4 2 1.07 0.08
 -23 4 2 0.85 0.08
 23 4 -2 0.86 0.07
 23 -4 -3 1.14 0.09
 23 -4 -3 1.32 0.1
 -23 -4 3 1.13 0.09
 23 -4 3 1.24 0.09
 23 4 -3 1.09 0.08
 -23 4 3 1.02 0.08
 23 -4 -4 2.28 0.13
 23 -4 -4 2.34 0.13
 -23 -4 4 2.32 0.13
 23 4 -4 2.2 0.12
 -23 4 4 2.03 0.12
 23 -4 4 2.25 0.12
 23 -4 -5 -0.01 0.02
 -23 -4 5 0.1 0.05
 -23 -4 5 0 0.02
 23 -4 -5 0.02 0.02
 23 -4 5 0.07 0.05
 -23 4 5 0 0.02
 23 4 -5 -0.01 0.02
 23 -4 -6 0.13 0.06
 -23 -4 6 0.11 0.05
 -23 4 6 0.18 0.06
 23 -4 6 0.24 0.06
 23 -5 0 0.77 0.07
 23 -5 0 0.66 0.07
 -23 -5 1 1.71 0.1
 23 -5 -1 1.74 0.11
 23 -5 -1 1.83 0.11
 23 -5 1 2.04 0.12
 23 -5 1 1.76 0.11
 23 -5 -2 3.63 0.17
 -23 -5 2 3.49 0.15
 23 -5 -2 3.41 0.16
 23 -5 2 3.29 0.15
 23 -5 2 3.66 0.16
 23 -5 -3 1.28 0.1
 -23 -5 3 1.38 0.09
 23 -5 -3 1.38 0.1
 23 -5 3 1.33 0.1
 23 -5 3 1.23 0.08
 -23 5 3 1.31 0.1
 23 -5 -4 0.71 0.08
 -23 -5 4 0.63 0.07
 23 -5 -4 0.78 0.09
 23 5 -4 0.68 0.08
 23 -5 4 0.59 0.07
 -23 5 4 0.66 0.08
 23 -5 -5 1.93 0.13
 23 -5 -5 2.02 0.13
 -23 -5 5 1.84 0.11
 -23 -5 5 2.17 0.13
 -23 5 5 2.03 0.12
 23 -5 5 2.07 0.12
 23 -6 0 5.23 0.21
 23 -6 0 5.4 0.21
 23 -6 -1 0.11 0.05
 23 -6 -1 0.09 0.05
 23 -6 1 0.01 0.02
 23 -6 1 0.08 0.05
 -23 -6 2 0.16 0.05
 23 -6 -2 0.13 0.05
 23 -6 -2 0.09 0.05
 23 -6 2 0.08 0.05
 23 -6 2 0.03 0.02
 23 -6 -3 1.32 0.1
 23 -6 -3 1.27 0.1
 -23 -6 3 1.34 0.09
 -23 6 3 1.28 0.09
 23 -6 3 1.23 0.09
 23 -6 3 1.27 0.1
 23 -6 -4 4.05 0.19
 -23 -6 4 3.89 0.17
 23 -6 -4 3.92 0.19
 23 -6 4 3.98 0.18
 -23 6 4 3.71 0.18
 23 -6 -5 0.17 0.06
 23 -6 -5 0.14 0.06
 -23 -6 5 0.23 0.06
 23 -6 5 0.23 0.06
 -23 6 5 0.19 0.06
 23 -7 0 1.53 0.1
 23 -7 0 1.29 0.1
 23 -7 -1 1.76 0.11
 23 -7 -1 1.58 0.11
 23 -7 1 1.46 0.1
 23 -7 1 1.63 0.11
 23 -7 -2 0.89 0.08
 -23 -7 2 0.83 0.07
 23 -7 -2 0.8 0.09
 23 -7 2 0.88 0.08
 23 -7 2 0.92 0.08
 23 -7 -3 2.16 0.13
 23 -7 -3 1.9 0.12
 -23 -7 3 1.94 0.11
 23 -7 3 1.8 0.11
 23 -7 3 1.91 0.12
 23 -7 -4 0.62 0.08
 23 -7 -4 0.64 0.08
 -23 -7 4 0.76 0.08
 23 -7 4 0.66 0.08
 -23 7 4 0.65 0.08
 23 -8 0 0.8 0.08
 23 -8 0 0.87 0.08
 23 -8 -1 4.38 0.19
 23 -8 -1 4.55 0.2
 23 -8 1 4.52 0.19
 23 -8 1 4.27 0.19
 23 -8 -2 0.81 0.09
 23 -8 -2 0.81 0.08
 23 -8 2 0.75 0.08
 23 -8 2 0.62 0.08
 23 -8 -3 0.12 0.06
 23 -8 -3 0.15 0.06
 -23 -8 3 0.23 0.05
 23 -8 3 0.22 0.06
 23 -8 3 0.14 0.06
 23 -9 0 -0.01 0.02
 23 -9 0 0 0.02
 23 -9 -1 3.21 0.16
 23 -9 -1 2.99 0.16
 23 -9 1 3.26 0.16
 23 -9 1 3.45 0.16
 23 -9 -2 3.55 0.18
 23 -9 -2 4.37 0.19
 23 -9 2 4.32 0.19
 23 -9 2 4.26 0.19
 24 0 0 4.42 0.17
 -24 0 0 4.14 0.17
 24 0 0 4.23 0.17
 24 0 1 0.26 0.05
 24 0 1 0.23 0.04
 -24 0 1 0.22 0.05
 24 0 -1 0.25 0.05
 24 0 -2 2.63 0.13
 24 0 2 2.34 0.12
 -24 0 2 2.54 0.13
 24 0 -3 2.21 0.12
 24 0 3 1.98 0.11
 -24 0 3 2.1 0.12
 -24 0 4 2.82 0.15
 24 0 -4 3.21 0.15
 24 0 4 2.82 0.13
 24 0 -5 0.28 0.06
 24 0 5 0.28 0.05
 -24 0 5 0.34 0.06
 24 0 -6 7.64 0.3
 -24 0 6 7.93 0.3
 24 -1 0 1.87 0.1
 -24 1 0 2.02 0.1
 24 1 0 1.83 0.1
 -24 -1 0 1.91 0.1
 24 -1 0 1.83 0.11
 -24 1 -1 0.43 0.05
 24 -1 -1 0.46 0.06
 -24 -1 1 0.43 0.06
 24 1 1 0.36 0.05
 24 -1 -1 0.47 0.06
 24 -1 1 0.46 0.06
 24 1 -1 0.32 0.05
 24 -1 1 0.47 0.06
 -24 1 1 0.43 0.06
 24 1 2 0.81 0.07
 24 -1 -2 0.9 0.08
 -24 -1 2 0.77 0.07
 24 -1 -2 0.98 0.08
 -24 1 2 0.8 0.08
 24 1 -2 0.75 0.07
 24 -1 2 0.86 0.07
 -24 -1 3 0.66 0.07
 24 -1 -3 0.58 0.07
 24 1 3 0.55 0.06
 24 -1 3 0.59 0.06
 24 1 -3 0.57 0.07
 -24 1 3 0.52 0.07
 -24 -1 4 2.38 0.13
 24 -1 -4 2.43 0.13
 24 1 4 2.07 0.12
 -24 1 4 2.57 0.13
 24 1 -4 2.41 0.13
 24 -1 4 2.23 0.12
 24 -1 -5 0.84 0.09
 -24 -1 5 0.98 0.09
 24 -1 5 0.9 0.08
 -24 1 5 1.08 0.09
 24 1 -5 0.94 0.09
 24 -1 -6 0.62 0.08
 -24 -1 6 0.75 0.08
 -24 -1 6 0.74 0.08
 -24 1 6 0.83 0.09
 24 1 -6 0.73 0.08
 24 -1 6 0.66 0.07
 24 -2 0 0.31 0.06
 24 -2 0 0.34 0.05
 24 2 0 0.3 0.05
 -24 2 0 0.3 0.05
 -24 -2 0 0.33 0.05
 24 2 1 0.83 0.07
 -24 2 -1 0.89 0.07
 -24 -2 1 0.81 0.07
 24 -2 -1 0.99 0.08
 24 -2 -1 0.94 0.08
 24 2 -1 0.92 0.07
 24 -2 1 0.94 0.08
 24 -2 1 0.88 0.07
 -24 2 1 0.97 0.08
 24 -2 -2 5.05 0.2
 24 2 2 4.41 0.18
 24 -2 -2 4.91 0.2
 -24 -2 2 4.85 0.19
 24 -2 2 4.9 0.19
 -24 2 2 4.47 0.19
 24 2 -2 4.44 0.19
 -24 -2 3 0.94 0.08
 24 -2 -3 0.88 0.08
 24 -2 -3 1.11 0.09
 24 2 -3 1.05 0.09
 24 -2 3 0.88 0.08
 -24 2 3 0.95 0.08
 24 -2 -4 5.17 0.22
 -24 -2 4 5.1 0.21
 24 -2 4 5.49 0.21
 24 2 -4 5.13 0.21
 -24 2 4 5.11 0.21
 24 -2 -5 0.09 0.06
 -24 -2 5 0.14 0.06
 24 2 -5 0.13 0.06
 -24 2 5 0.05 0.03
 24 -2 5 0.07 0.05
 24 -2 -6 -0.01 0.02
 -24 -2 6 0.02 0.02
 24 -2 6 -0.01 0.01
 24 2 -6 0.08 0.06
 24 3 0 0.01 0.01
 -24 3 0 0.06 0.04
 24 -3 0 0.07 0.04
 24 -3 0 0 0.01
 24 -3 -1 1.99 0.12
 24 -3 -1 2.12 0.12
 -24 -3 1 2.02 0.11
 -24 3 1 2.08 0.11
 24 -3 1 1.83 0.11
 24 -3 1 2.07 0.12
 24 3 -1 1.79 0.1
 24 -3 -2 4.73 0.19
 24 -3 -2 4.61 0.19
 -24 -3 2 4.08 0.17
 -24 3 2 4.13 0.18
 24 -3 2 4.3 0.18
 24 3 -2 4 0.17
 24 -3 2 3.98 0.17
 24 -3 -3 0.82 0.08
 24 -3 -3 0.76 0.08
 -24 -3 3 0.73 0.07
 24 3 -3 0.78 0.07
 -24 3 3 0.78 0.08
 24 -3 3 0.67 0.07
 24 -3 -4 9.18 0.32
 24 -3 -4 8.41 0.31
 -24 -3 4 8.71 0.31
 -24 3 4 8.49 0.31
 24 -3 4 8.76 0.31
 24 3 -4 8.61 0.31
 -24 -3 5 0.39 0.07
 24 -3 -5 0.18 0.06
 -24 -3 5 0.31 0.06
 24 -3 5 0.38 0.06
 -24 3 5 0.37 0.07
 24 3 -5 0.29 0.06
 24 -4 0 4.68 0.19
 24 -4 0 4.5 0.19
 24 -4 -1 0.46 0.07
 24 -4 -1 0.56 0.07
 -24 -4 1 0.53 0.06
 24 -4 1 0.53 0.07
 24 -4 1 0.39 0.06
 24 -4 -2 6.49 0.25
 -24 -4 2 6.29 0.23
 24 -4 -2 6.61 0.25
 24 -4 2 6.43 0.23
 24 -4 2 6.51 0.25
 -24 4 2 6.54 0.25
 24 -4 -3 0.83 0.09
 24 -4 -3 0.87 0.08
 -24 -4 3 0.84 0.08
 -24 4 3 0.71 0.08
 24 -4 3 0.76 0.07
 24 4 -3 0.69 0.07
 24 -4 -4 2.14 0.13
 24 -4 -4 1.87 0.12
 -24 -4 4 2.25 0.13
 24 -4 4 2.39 0.13
 -24 4 4 2.29 0.13
 24 4 -4 1.88 0.12
 24 -4 -5 1.09 0.1
 -24 -4 5 1.04 0.08
 -24 -4 5 1 0.09
 24 4 -5 1.19 0.09
 24 -4 5 1.15 0.09
 -24 4 5 0.96 0.09
 24 -5 0 1.9 0.11
 24 -5 0 1.76 0.11
 24 -5 -1 1.9 0.12
 24 -5 -1 2.05 0.12
 24 -5 1 1.95 0.12
 24 -5 1 1.97 0.11
 24 -5 -2 2.05 0.12
 -24 -5 2 2.06 0.11
 24 -5 -2 2.06 0.12
 24 -5 2 1.99 0.11
 -24 5 2 1.88 0.12
 24 -5 2 2.09 0.12
 24 -5 -3 2.63 0.15
 -24 -5 3 2.56 0.13
 24 -5 -3 2.48 0.14
 24 -5 3 2.89 0.14
 -24 5 3 2.7 0.14
 -24 -5 4 2 0.12
 24 -5 -4 1.93 0.13
 24 -5 -4 1.79 0.12
 -24 5 4 1.95 0.12
 24 -5 4 1.91 0.12
 24 -5 -5 0.58 0.08
 24 -5 -5 0.44 0.08
 -24 -5 5 0.57 0.08
 -24 5 5 0.48 0.07
 24 -5 5 0.52 0.07
 24 -6 0 0.51 0.07
 24 -6 0 0.45 0.07
 24 -6 -1 0.09 0.05
 24 -6 -1 0.02 0.02
 24 -6 1 0.09 0.05
 24 -6 1 0.11 0.05
 -24 -6 2 1.76 0.1
 24 -6 -2 1.77 0.12
 24 -6 -2 1.99 0.12
 24 -6 2 1.81 0.11
 24 -6 2 1.76 0.11
 -24 -6 3 0 0.02
 24 -6 -3 0.09 0.06
 24 -6 -3 0.1 0.06
 24 -6 3 0 0.02
 24 -6 3 0 0.01
 -24 6 3 0.01 0.02
 24 -6 -4 1.06 0.1
 -24 -6 4 1.03 0.09
 24 -6 -4 1.15 0.1
 -24 6 4 1.12 0.1
 24 -6 4 1.2 0.09
 24 -7 0 1.54 0.11
 24 -7 0 1.38 0.1
 24 -7 -1 2.1 0.13
 24 -7 -1 2.08 0.13
 24 -7 1 2.15 0.12
 24 -7 1 2.17 0.13
 24 -7 -2 3.63 0.17
 -24 -7 2 3.49 0.16
 24 -7 -2 3.47 0.17
 24 -7 2 3.65 0.17
 24 -7 2 3.5 0.16
 24 -7 -3 0.75 0.09
 -24 -7 3 0.95 0.08
 24 -7 -3 0.86 0.09
 24 -7 3 0.87 0.08
[truncated: 13,399 more chars]
